# Supplementary material for: Does caste determine farmer access to quality information?
Source: PLoS One. 2019 Jan 25;14(1):e0210721. doi: 10.1371/journal.pone.0210721 (PMC6347220; doi:10.1371/journal.pone.0210721)
Supplement: S1 File — (XLSX) [file pone.0210721.s002.xlsx]

## Sheet: VARIABLES
VARIABLE NAME	DEFINITION
REGION	1: East India; 2: North India; 3: South India; 4: Semi Arid Tropics; 5: Rest of India
STATE	01 = Jammu & Kashmir; 02 = Himachal Pradesh; 03 = Punjab; 04 = Chandigarh; 05 = Uttaranchal; 06 = Haryana; 07 = Delhi; 08 = Rajasthan; 09 = Uttar Pradesh; 10 = Bihar; 11 = Sikkim; 12 =Arunachal Pradesh; 13 = Nagaland; 14 = Manipur; 15 = Mizoram; 16 = Tripura; 17 = Meghalaya; 18 = Assam; 19 = West Bengal; 20 = Jharkhand; 21 = Odisha; 22 = Chhattisgarh; 23 = Madhya Pradesh; 24 = Gujarat; 25 = Daman…
DISTRICT	District IDs
VILLAGE	Village IDs
HOUSEHOLD	Household IDs
SAMPLE_WEIGHT	Sampling weight provided by the NSSO
SC	Caste group: Scheduled castes
ST	Caste group: Scheduled tribes
OSMC_MUSLIM	Caste group: Other socially marginalized castes (Muslim)
OSMC_NONMUSLIM	Caste group: Other socially marginalized castes (Non-Muslim)
NON_MARGINALIZED	Caste group: Non-marginalized castes
CROP_INCOME	Crop income (Rs/household/year)
INCLUDE	1: Include the household in the analysis; 0: Do not include the household in the analysis
CROP_INCOME_THOUSAND_NOEXTREME	Crop income (thousand Rs/household/year; excluding the extreme values)
EXTN_CONTACT	Extension contact dummy
EXTN_FREQ	Extension contact frequncy (number)
HOMESTEAD	Homestead farming dummy
LAND_OWNED	Land owned by the household in hectares
HOUSEHOLD_SIZE	Household size (number)
HH_SIZE_AE	Household size (adult equivalents)
HOH_AGE	Age of household head
HOH_SEX	Sex of household head (1 = female; 0 = male)
HOH_EDUCATION	Household head’s education (scale; 1-13)
OWNED_DWELLING	Possesses owned dwelling (dummy)
TYPE_DWELLING	Type of dwelling (1 = bad/ kaccha, 2 = medium/ semi-pucca 3 = good/ pucca)
BPL	Household belongs to 'Below Poverty Line' (dummy)
CROPS_MAININCOME	Crop production is the main source of income (dummy)
LIVESTOCK_MAININCOME	Livestock production is the main source of income (dummy)
NONFARM_MAININCOME	Non_farm activities are the main source of income (dummy)
WAGE_MAININCOME	Wages are the main source of income (dummy)
PENSION_REM_MAININCOME	Pension/Remittance is the main source of income (dummy)
CEREAL	Household cultivates cereal crops (dummy)
LEGUME	Household cultivates legume crops (dummy)
SUGAR	Household cultivates sugar crops (dummy)
SPICE	Household cultivates spice crops (dummy)
FRUIT_NUT	Household cultivates fruit and nut crops (dummy)
ROOT_STARTCH	Household cultivates root and starch crops (dummy)
VEGETABLES	Household cultivates vegetable crops (dummy)
OILSEEDS	Household cultivates oil seed crops (dummy)
BEVERAGE	Household cultivates beverage crops (dummy)
OTHERS	Household cultivates crops outside the abovementioned categories (dummy)
NOT_AVAILABLE	Share of households not accessing extension services due to lack of their availability (0-1)
DISTRICT_MARGINALIZED_MINOR	Districts where marginalized castes form a minority (<33%) in the population (dummy)
DISTRICT_MARGINALIZED_MAJOR	Districts where marginalized castes form a majority (>66%) in the population (dummy)
DISTRICT_BPL_MINOR	Districts where BPL form a minority (<33%) in the population (dummy)
DISTRICT_BPL_MAJOR	Districts where BPL form a majority (>66%) in the population (dummy)

## Sheet: DATA
HOUSEHOLD	REGION	STATE	DISTRICT	VILLAGE	SAMPLE_WEIGHT	SC	ST	OSMC_MUSLIM	OSMC_NONMUSLIM	NON_MARGINALIZED	CROP_INCOME	INCLUDE	CROP_INCOME_THOUSAND_NOEXTREME	EXTN_CONTACT	EXTN_FREQ	HOMESTEAD	LAND_OWNED	HOUSEHOLD_SIZE	HH_SIZE_AE	HOH_AGE	HOH_SEX	HOH_EDUCATION	OWNED_DWELLING	TYPE_DWELLING	BPL	CROPS_MAININCOME	LIVESTOCK_MAININCOME	NONFARM_MAININCOME	WAGE_MAININCOME	PENSION_REM_MAININCOME	CEREAL	LEGUME	SUGAR	SPICE	FRUIT_NUT	ROOT_STARTCH	VEGETABLES	OILSEEDS	BEVERAGE	OTHERS	NOT_AVAILABLE	DISTRICT_MARGINALIZED_MINOR	DISTRICT_MARGINALIZED_MAJOR	DISTRICT_BPL_MINOR	DISTRICT_BPL_MAJOR
21817	5	1	101	24403	663	0	0	0	0	1	22100	1	22.1	0	0	0	0.202	3	2	37	0	5	1	2	0	0	0	0	1	0	1	0	0	0	1	1	0	0	0	0	0.0205863	0	0	0	0
21818	5	1	101	24403	663	0	0	0	0	1	17950	1	17.95	0	0	0	0.202	5	2.8	38	0	5	1	2	0	0	0	0	1	0	1	0	0	0	1	1	0	0	0	0	0.0205863	0	0	0	0
21819	5	1	101	24403	663	0	0	0	0	1	18750	1	18.75	0	0	0	0.303	6	3.5	48	0	7	1	2	0	0	0	0	1	0	1	0	0	0	1	1	0	0	0	0	0.0205863	0	0	0	0
21820	5	1	101	24403	663	0	0	0	0	1	6950	1	6.95	0	0	0	0.151	7	4	52	0	5	1	2	0	0	0	0	1	0	1	0	0	0	1	1	0	0	0	0	0.0205863	0	0	0	0
21821	5	1	101	24403	955.5	0	0	0	0	1	1000	1	1	0	0	0	0.29	6	3.1	42	0	1	1	2	1	0	0	0	1	0	1	0	0	0	0	1	0	0	0	0	0.0205863	0	0	0	0
21822	5	1	101	24403	955.5	0	0	0	0	1	6050	1	6.05	0	0	0	0.5	5	3	48	0	1	1	2	1	0	0	0	1	0	1	0	0	0	0	1	0	0	0	0	0.0205863	0	0	0	0
21823	5	1	101	24403	955.5	0	0	0	0	1	1300	1	1.3	0	0	0	0.303	5	3	51	0	1	1	2	1	0	0	0	1	0	1	0	0	0	0	1	0	0	0	0	0.0205863	0	0	0	0
21824	5	1	101	24403	955.5	0	0	0	0	1	2100	1	2.1	0	0	0	0.202	3	2	48	0	10	1	2	0	0	0	0	1	0	1	0	0	0	0	1	0	0	0	0	0.0205863	0	0	0	0
21841	5	1	101	24406	87.5	0	0	1	0	0	incomplete data	0				1	0.015	3	1.8	28	0	7	1	2		0	0	0	1	0	1	0	0	0	0	0	0	0	0	1	0.0205863	0	1	0	1
21842	5	1	101	24406	87.5	0	0	1	0	0	incomplete data	0				1	0.015	3	1.8	22	0	6	1	3		0	0	0	1	0	1	0	0	0	0	0	0	0	0	1	0.0205863	0	1	0	1
21843	5	1	101	24406	87.5	0	0	1	0	0	6650	1	6.65	0	0	0	0.175	6	2.9	40	0	8	1	3	0	0	0	0	1	0	1	0	0	0	0	0	1	0	0	0	0.0205863	0	0	0	0
21844	5	1	101	24406	87.5	0	0	1	0	0	3550	1	3.55	0	0	0	0.07	7	3.8	48	0	8	1	3	1	0	0	0	1	0	1	0	0	0	0	0	1	0	0	0	0.0205863	0	0	0	0
21845	5	1	101	24406	1387.5	0	0	1	0	0	incomplete data	0				1	0.017	5	2.4	35	0	7	1	3	0	0	0	1	0	0	1	0	0	0	0	0	1	0	0	0	0.0205863	0	1	0	1
21846	5	1	101	24406	1387.5	0	0	1	0	0	incomplete data	0				1	0.02	6	2.7	38	0	6	1	3	0	0	0	1	0	0	1	0	0	0	0	0	1	0	0	0	0.0205863	0	1	0	1
21847	5	1	101	24406	1387.5	0	0	1	0	0	3250	1	3.25	0	0	1	0.025	5	2.4	39	0	7	1	3	0	0	0	0	1	0	0	0	0	0	0	0	1	0	0	0	0.0205863	0	0	0	0
21848	5	1	101	24406	1387.5	0	0	1	0	0	8050	1	8.05	0	0	0	0.112	5	2.8	59	0	1	1	2	1	0	0	0	1	0	1	0	0	1	0	0	1	0	0	0	0.0205863	0	0	0	0
21865	5	1	101	24409	259	0	1	0	0	0	incomplete data	0				1	0.01	6	2.9	52	0	1	1	3	1	0	0	0	1	0	1	0	0	1	1	0	1	0	0	0	0.0205863	0	1	0	1
21866	5	1	101	24409	259	0	1	0	0	0	incomplete data	0				1	0.01	5	2.8	48	0	5	1	3	1	0	0	0	1	0	1	0	0	1	1	0	1	0	0	0	0.0205863	0	1	0	1
21867	5	1	101	24409	1187.09	0	1	0	0	0	5450	1	5.45	0	0	0	0.162	1	1	30	0	6	1	3		1	0	0	0	0	1	0	0	0	0	0	1	0	0	0	0.0205863	0	0	0	0
21868	5	1	101	24409	1187.09	0	1	0	0	0	11725	1	11.725	0	0	0	0.175	6	3.5	52	0	7	1	3	0	0	0	0	1	0	1	0	0	0	0	0	1	0	0	0	0.0205863	0	0	0	0
21869	5	1	101	24409	1187.09	0	1	0	0	0	7000	1	7	0	0	0	0.15	5	3	70	0	1	1	3	1	0	0	0	0	0	1	0	0	0	0	0	1	0	0	0	0.0205863	0	0	0	0
21870	5	1	101	24409	1187.09	0	1	0	0	0	32100	1	32.1	0	0	0	0.625	6	2.7	39	0	12	1	3	0	0	0	0	1	0	1	0	0	0	0	0	1	0	0	0	0.0205863	0	0	0	0
21871	5	1	101	24409	1187.09	0	1	0	0	0	19300	1	19.3	5	1	0	0.32	6	3.5	62	0	1	1	3	0	0	0	0	1	0	1	0	0	0	0	0	1	0	0	0	0.0205863	0	0	0	0
21872	5	1	101	24409	1187.09	0	1	0	0	0	7550	1	7.55	0	0	0	0.115	7	3.4	39	0	6	1	3	1	0	0	1	0	0	1	0	0	0	0	0	1	0	0	0	0.0205863	0	0	0	0
22096	5	1	101	24438	992.84	0	0	0	1	0	3930	1	3.93	0	0	0	0.125	5	3	58	0	7	1	3	0	0	0	0	1	0	1	0	0	0	0	0	0	0	0	0	0.0205863	0	0	0	0
22097	5	1	101	24438	992.84	0	0	1	0	0	10150	1	10.15	0	0	0	0.27	2	1.5	54	0	7	1	3	0	0	0	0	1	0	1	0	0	0	0	0	1	0	0	0	0.0205863	0	0	0	0
22098	5	1	101	24438	992.84	0	0	0	1	0	7120	1	7.12	0	0	0	0.17	8	3.9	59	0	5	1	3	0	0	0	0	1	0	1	0	0	0	0	0	1	0	0	0	0.0205863	0	0	0	0
22099	5	1	101	24438	992.84	0	0	0	1	0	7305	1	7.305	0	0	0	0.165	5	2.4	34	0	7	1	3	1	0	0	0	1	0	1	0	0	0	0	0	0	0	0	0	0.0205863	0	0	0	0
22100	5	1	101	24438	992.84	0	0	1	0	0	9285	1	9.285	0	0	0	0.265	6	2.9	40	0	7	1	3	0	0	0	1	0	0	1	0	0	0	0	0	1	0	0	0	0.0205863	0	0	0	0
22101	5	1	101	24438	992.84	0	0	0	1	0	8590	1	8.59	0	0	0	0.22	3	2	63	0	10	1	3	0	0	0	0	0	1	1	0	0	0	0	0	0	0	0	0	0.0205863	0	0	0	0
22102	5	1	101	24438	129.5	0	0	0	1	0	64150	1	64.15	0	0	0	1.125	3	2	59	0	7	1	3	0	0	0	0	0	1	1	0	0	0	0	0	0	0	0	0	0.0205863	0	0	0	0
22103	5	1	101	24438	129.5	0	0	0	1	0	29920	1	29.92	5	1	0	1.06	10	4.9	61	0	8	1	3	0	0	0	0	1	0	1	0	0	0	0	0	0	0	0	0	0.0205863	0	0	0	0
22280	5	1	101	24462	200	0	1	0	0	0	3480	1	3.48	0	0	0	0.075	7	3.4	44	0	12	1	3	0	0	0	0	1	0	1	0	0	0	0	0	1	0	0	0	0.0205863	0	0	0	0
22281	5	1	101	24462	200	0	1	0	0	0	8650	1	8.65	0	0	0	0.165	4	2.1	31	0	8	1	1	0	0	0	1	0	0	1	0	0	0	0	0	1	0	0	0	0.0205863	0	0	0	0
22282	5	1	101	24462	200	0	1	0	0	0	1590	1	1.59	0	0	0	0.04	2	1.5	60	0	1	1	3	1	0	0	0	0	1	0	0	0	0	0	0	1	0	0	0	0.0205863	0	0	0	0
22283	5	1	101	24462	12.5	0	1	0	0	0	82490	1	82.49	5	1	0	1.6	15	7	72	0	5	1	3	0	1	0	0	0	0	1	0	0	1	0	0	1	0	0	0	0.0205863	0	0	0	0
22284	5	1	101	24462	721.88	0	1	0	0	0	6750	1	6.75	0	0	0	0.115	7	3.4	39	0	6	1	3	1	0	0	0	1	0	1	0	0	1	0	0	1	0	0	0	0.0205863	0	0	0	0
22285	5	1	101	24462	721.88	0	1	0	0	0	46680	1	46.68	0	0	0	0.52	8	4.1	71	0	1	1	3	0	1	0	0	0	0	1	0	0	0	1	0	1	0	0	0	0.0205863	0	0	0	0
22286	5	1	101	24462	721.88	0	1	0	0	0	8540	1	8.54	0	0	0	0.165	6	2.7	40	0	6	1	3	1	0	0	0	1	0	1	0	0	0	0	0	1	0	0	0	0.0205863	0	0	0	0
22287	5	1	101	24462	721.88	0	1	0	0	0	8350	1	8.35	0	0	0	0.175	3	2	49	0	7	1	3	0	0	0	0	1	0	1	0	0	0	0	0	1	0	0	0	0.0205863	0	0	0	0
22296	5	1	101	24464	78	0	0	0	0	1	1210	1	1.21	0	0	0	0.075	4	2.1	35	0	1	1	3	1	0	0	0	1	0	0	0	0	0	0	0	1	0	0	1	0.0205863	0	0	0	0
22297	5	1	101	24464	715	0	0	0	0	1	540	1	0.54	0	0	0	0.225	3	2	30	1	5	1	3		0	0	0	0	1	1	0	0	0	0	0	1	0	0	1	0.0205863	0	0	0	0
22298	5	1	101	24464	715	0	0	0	0	1	-3800	1	-3.8	0	0	0	0.375	5	3	45	0	8	1	3	0	0	0	0	1	0	1	0	0	0	0	0	1	0	0	1	0.0205863	0	0	0	0
22299	5	1	101	24464	715	0	0	0	0	1	-2350	1	-2.35	0	0	0	0.175	7	3.2	45	0	1	1	3	1	0	0	0	1	0	1	0	0	0	0	0	1	0	0	1	0.0205863	0	0	0	0
22300	5	1	101	24464	156	0	0	0	0	1	1200	1	1.2	0	0	0	0.2	2	1.5	60	0	8	1	2	0	0	0	0	1	0	1	0	0	0	0	0	1	0	0	1	0.0205863	0	0	0	0
22301	5	1	101	24464	1404	0	0	0	0	1	2300	1	2.3	0	0	0	0.303	4	2.3	35	0	12	1	2	0	0	0	0	1	0	1	0	0	0	0	0	1	0	0	1	0.0205863	0	0	0	0
22302	5	1	101	24464	1404	0	0	0	0	1	8100	1	8.1	0	0	0	0.91	5	3	60	0	10	1	2	0	0	0	0	0	0	1	0	0	0	0	0	1	0	0	1	0.0205863	0	0	0	0
22303	5	1	101	24464	1404	0	0	0	0	1	900	1	0.9	0	0	0	0.15	3	2	40	0	1	1	2	1	0	0	0	1	0	1	0	0	0	0	0	1	0	0	1	0.0205863	0	0	0	0
21849	5	1	102	24407	1270.5	0	0	1	0	0	12000	1	12	0	0	0	0.91	7	3.8	47	0	1	1	3	1	0	0	0	1	0	1	0	0	1	0	0	1	0	0	0	0.0230406	0	0	0	0
21850	5	1	102	24407	1270.5	0	0	1	0	0	2980	1	2.98	0	0	0	0.253	5	2.8	45	0	5	1	3	1	0	0	0	1	0	1	0	0	1	0	0	1	0	0	0	0.0230406	0	0	0	0
21851	5	1	102	24407	1270.5	0	0	1	0	0	4000	1	4	0	0	0	0.303	7	3.8	52	1	1	1	3	1	0	0	0	1	0	1	0	0	1	0	0	1	0	0	0	0.0230406	0	0	0	0
21852	5	1	102	24407	1270.5	0	0	1	0	0	7170	1	7.17	0	0	0	0.607	3	2	40	1	1	1	3	1	0	0	0	1	0	1	0	0	1	0	0	1	0	0	0	0.0230406	0	0	0	0
21853	5	1	102	24407	1270.5	0	0	1	0	0	1760	1	1.76	0	0	0	0.202	4	2.5	40	1	1	1	3	1	0	0	0	1	0	1	0	0	1	0	0	1	0	0	0	0.0230406	0	0	0	0
21854	5	1	102	24407	1270.5	0	0	1	0	0	1990	1	1.99	0	0	0	0.202	3	2	43	1	1	1	3	1	0	0	0	1	0	1	0	0	1	0	0	1	0	0	0	0.0230406	0	0	0	0
21855	5	1	102	24407	181.5	0	0	1	0	0	23390	1	23.39	0	0	0	1.366	8	4.3	55	0	1	1	3	1	0	0	0	0	0	1	0	0	1	0	0	1	0	0	0	0.0230406	0	0	0	0
21856	5	1	102	24407	181.5	0	0	1	0	0	14175	1	14.175	0	0	0	0.91	6	3.5	44	0	1	1	3	1	0	0	0	0	0	1	0	0	1	0	0	1	0	0	0	0.0230406	0	0	0	0
21857	5	1	102	24408	2881.5	0	0	0	0	1	6425	1	6.425	0	0	0	0.16	6	3.3	60	0	5	1	3	1	0	0	0	1	0	1	0	0	1	0	1	1	0	0	0	0.0230406	0	0	0	0
21858	5	1	102	24408	226	0	0	0	0	1	89650	1	89.65	0	0	0	1.075	8	4.1	69	0	1	1	3	0	0	0	0	0	0	1	0	0	1	1	0	1	0	0	0	0.0230406	0	0	0	0
21859	5	1	102	24408	56.5	0	0	0	0	1	92820	1	92.82	0	0	0	2.275	8	4.1	65	0	1	1	3	0	1	0	0	0	0	1	0	0	1	0	0	1	0	0	0	0.0230406	0	0	0	0
21860	5	1	102	24408	56.5	0	0	0	0	1	268150	1	268.15	0	0	0	2.1	8	4.5	45	0	1	1	3	0	1	0	0	0	0	1	0	0	1	1	0	1	0	0	0	0.0230406	0	0	0	0
21861	5	1	102	24408	56.5	0	0	0	0	1	251408	1	251.408	10	1	0	1.765	9	5	45	0	7	1	3	0	0	0	0	0	0	1	0	0	1	1	0	1	0	0	0	0.0230406	0	0	0	0
21862	5	1	102	24408	56.5	0	0	0	0	1	62000	1	62	0	0	0	2.225	7	3.4	50	0	7	1	3	0	0	0	0	0	0	1	0	0	0	0	0	1	0	0	0	0.0230406	0	0	0	0
21863	5	1	102	24408	13842.5	0	0	0	0	1	4500	1	4.5	0	0	0	0.075	7	3.6	51	0	7	1	3	0	0	0	0	1	0	0	0	0	0	0	0	1	0	0	0	0.0230406	0	0	0	0
21864	5	1	102	24408	565	0	0	0	0	1	105400	1	105.4	0	0	0	1	8	4.1	65	0	1	1	3	0	0	0	0	0	0	1	0	0	1	1	0	1	0	0	0	0.0230406	0	0	0	0
22264	5	1	102	24460	2250	0	0	0	0	1	12500	1	12.5	0	0	0	0.175	6	2.9	30	0	7	1	2	1	0	0	0	1	0	1	0	0	0	1	0	0	0	0	1	0.0230406	0	0	0	0
22265	5	1	102	24460	37.5	0	0	0	0	1	53240	1	53.24	0	0	0	1.45	7	4	56	0	1	1	3	0	0	0	0	0	0	1	0	0	0	1	0	0	0	0	1	0.0230406	0	0	0	0
22266	5	1	102	24460	37.5	0	0	0	0	1	25900	1	25.9	0	0	0	1.475	6	3.3	36	0	7	1	3	0	0	0	0	1	0	1	0	0	0	0	0	0	0	0	1	0.0230406	0	0	0	0
22267	5	1	102	24460	37.5	0	0	0	0	1	42600	1	42.6	0	0	0	1.425	7	3.8	70	0	1	1	3	1	0	0	0	1	0	1	0	0	0	1	0	0	0	0	1	0.0230406	0	0	0	0
22268	5	1	102	24460	37.5	0	0	0	0	1	66000	1	66	0	0	0	1.075	11	5.4	70	0	1	1	3	1	0	0	0	0	0	1	0	0	0	1	0	0	0	0	1	0.0230406	0	0	0	0
22269	5	1	102	24460	225	0	0	0	0	1	31700	1	31.7	0	0	0	0.66	6	3.3	52	0	5	1	3	0	0	0	0	0	0	1	0	0	0	0	0	0	0	0	1	0.0230406	0	0	0	0
22270	5	1	102	24460	225	0	0	0	0	1	17200	1	17.2	0	0	0	0.22	6	3.5	56	0	10	1	3	0	0	0	0	1	0	1	0	0	0	0	0	0	0	0	1	0.0230406	0	0	0	0
22271	5	1	102	24460	11400	0	0	0	0	1	10900	1	10.9	0	0	0	0.156	3	2	38	0	10	1	3	0	0	0	0	1	0	1	0	0	0	0	0	0	0	0	1	0.0230406	0	0	0	0
22272	5	1	102	24461	1179.75	0	0	0	0	1	9800	1	9.8	0	0	0	0.506	6	3.5	50	0	6	1	2	0	0	0	0	0	0	1	0	0	0	0	0	0	0	0	1	0.0230406	0	0	0	0
22273	5	1	102	24461	1179.75	0	0	0	0	1	-150	1	-0.15	0	0	0	0.225	11	5.2	53	0	8	1	3	1	0	0	0	1	0	1	0	0	0	0	0	0	0	0	1	0.0230406	0	0	0	0
22274	5	1	102	24461	1179.75	0	0	0	0	1	2200	1	2.2	0	0	0	0.202	5	2.6	45	0	7	1	2	1	0	0	0	1	0	1	0	0	0	0	0	0	0	0	1	0.0230406	0	0	0	0
22275	5	1	102	24461	1179.75	0	0	0	0	1	450	1	0.45	0	0	0	0.101	4	2.5	50	0	1	1	2	1	0	0	0	1	0	1	0	0	0	0	0	0	0	0	1	0.0230406	0	0	0	0
22276	5	1	102	24461	1179.75	0	0	0	0	1	1800	1	1.8	4	1	0	0.154	8	4.5	40	0	1	1	2	1	0	0	0	1	0	1	0	0	0	0	0	0	0	0	1	0.0230406	0	0	0	0
22277	5	1	102	24461	1179.75	0	0	0	0	1	1800	1	1.8	0	0	0	0.154	6	3.5	38	0	7	1	2	1	0	0	0	1	0	1	0	0	0	0	0	0	0	0	1	0.0230406	0	0	0	0
22278	5	1	102	24461	1179.75	0	0	0	0	1	2100	1	2.1	0	0	0	0.202	5	3	45	0	7	1	3	1	0	0	0	1	0	1	0	0	0	0	0	0	0	0	1	0.0230406	0	0	0	0
22279	5	1	102	24461	1179.75	0	0	0	0	1	16300	1	16.3	0	0	0	0.91	7	3.4	67	0	1	1	2	1	0	0	0	1	0	1	0	0	0	0	0	0	0	0	1	0.0230406	0	0	0	0
22304	5	1	102	24465	2486	0	0	0	0	1	4010	1	4.01	0	0	0	0.075	4	2.5	48	0	1	1	3	0	0	0	0	1	0	1	0	0	0	0	0	1	0	0	0	0.0230406	0	0	0	0
22305	5	1	102	24465	4746	0	0	0	0	1	69000	1	69	0	0	0	0.825	6	3.1	64	0	7	1	3	0	0	0	0	1	0	1	0	0	0	1	0	1	0	0	0	0.0230406	0	0	0	0
22306	5	1	102	24465	4746	0	0	0	0	1	67850	1	67.85	0	0	0	0.619	7	3.8	49	0	8	1	3	0	0	0	0	1	0	1	0	0	1	1	0	1	0	0	0	0.0230406	0	0	0	0
22307	5	1	102	24465	226	0	0	0	0	1	89340	1	89.34	10	1	0	1.425	5	3	45	0	12	1	3	0	0	0	0	1	0	1	0	0	1	1	0	1	0	0	0	0.0230406	0	0	0	0
22308	5	1	102	24465	226	0	0	0	0	1	113150	1	113.15	5	1	0	1.325	8	4.3	53	0	5	1	3	0	1	0	0	0	0	1	0	0	1	1	0	1	0	0	0	0.0230406	0	0	0	0
22309	5	1	102	24465	226	0	0	0	0	1	30800	1	30.8	10	1	0	1.5	11	4.8	70	0	13	1	3	0	0	0	0	0	1	0	0	0	0	1	0	1	0	0	0	0.0230406	0	0	0	0
22310	5	1	102	24465	226	0	0	0	0	1	51380	1	51.38	10	1	0	0.25	5	3	50	0	6	1	3	0	1	0	0	0	0	0	0	0	1	1	0	1	0	0	0	0.0230406	0	0	0	0
22311	5	1	102	24465	226	0	0	0	0	1	106660	1	106.66	10	1	0	1.625	5	2.8	66	0	13	1	3	0	0	0	0	1	0	1	0	0	0	0	0	1	0	0	0	0.0230406	0	0	0	0
22457	5	1	102	24494	550	0	0	1	0	0	250	1	0.25	0	0	0	0.101	5	3	43	0	6	1	2	1	0	0	0	1	0	1	0	0	0	0	0	1	0	0	1	0.0230406	0	0	0	0
22458	5	1	102	24494	550	0	0	1	0	0	33800	1	33.8	0	0	0	0.202	5	2.6	40	0	1	1	2	1	0	0	0	1	0	1	0	0	0	1	0	1	0	0	1	0.0230406	0	0	0	0
22459	5	1	102	24494	550	0	0	1	0	0	79600	1	79.6	0	0	0	0.303	5	3	42	0	5	1	2	1	0	0	0	0	0	1	0	0	0	1	0	1	0	0	1	0.0230406	0	0	0	0
22460	5	1	102	24494	550	0	0	1	0	0	17500	1	17.5	0	0	0	0.151	7	4	55	0	5	1	2	1	0	0	0	1	0	1	0	0	0	0	0	1	0	0	1	0.0230406	0	0	0	0
22461	5	1	102	24494	3500	0	0	1	0	0	79900	1	79.9	0	0	0	0.354	5	3	45	0	5	1	2	1	0	0	0	0	0	1	0	0	0	1	0	1	0	0	1	0.0230406	0	0	0	0
22462	5	1	102	24494	3500	0	0	1	0	0	54600	1	54.6	0	0	0	0.202	6	3.5	48	0	1	1	2	1	0	0	0	1	0	1	0	0	0	1	0	1	0	0	1	0.0230406	0	0	0	0
22463	5	1	102	24494	3500	0	0	1	0	0	3500	1	3.5	0	0	0	0.202	3	2	42	0	1	1	2	1	0	0	0	1	0	1	0	0	0	0	0	1	0	0	1	0.0230406	0	0	0	0
22464	5	1	102	24494	3500	0	0	1	0	0	31900	1	31.9	0	0	0	0.151	3	2	38	0	7	1	2	1	0	0	0	1	0	1	0	0	0	1	0	1	0	0	1	0.0230406	0	0	0	0
22288	5	1	104	24463	963.5	0	0	1	0	0	3570	1	3.57	0	0	0	0.18	4	2.5	48	0	1	1	2	1	0	0	1	0	0	1	0	0	0	0	0	1	0	0	0	0.092107	0	0	0	0
22289	5	1	104	24463	963.5	0	0	1	0	0	700	1	0.7	0	0	0	0.125	7	3.2	35	0	1	1	2	1	0	0	1	0	0	1	0	0	0	0	0	1	0	0	0	0.092107	0	0	0	0
22290	5	1	104	24463	963.5	0	0	1	0	0	48800	1	48.8	0	0	0	0.625	5	2.4	37	0	7	1	3	1	0	0	0	1	0	1	0	0	0	0	0	1	0	0	1	0.092107	0	0	0	0
22291	5	1	104	24463	963.5	0	0	1	0	0	2420	1	2.42	0	0	0	0.2	6	3.1	44	0	1	1	1	1	0	0	0	1	0	1	0	0	0	0	0	1	0	0	1	0.092107	0	0	0	0
22292	5	1	104	24463	963.5	0	0	1	0	0	810	1	0.81	0	0	0	0.185	8	3.5	47	0	8	1	2	1	0	0	0	1	0	1	0	0	0	0	0	1	0	0	1	0.092107	0	0	0	0
22293	5	1	104	24463	963.5	0	0	1	0	0	4230	1	4.23	0	0	0	0.3	9	4.4	70	0	1	1	3	1	0	0	0	1	0	1	0	0	0	0	0	1	0	0	0	0.092107	0	0	0	0
22294	5	1	104	24463	963.5	0	0	1	0	0	12220	1	12.22	0	0	0	0.3	7	3.6	60	0	1	1	1	1	0	0	0	1	0	1	0	0	0	0	0	1	0	0	1	0.092107	0	0	0	0
22295	5	1	104	24463	963.5	0	0	1	0	0	8400	1	8.4	0	0	0	0.225	8	3.9	60	0	1	1	3	1	0	0	0	1	0	1	0	0	0	0	0	1	0	0	1	0.092107	0	0	0	0
22312	5	1	104	24466	1120.13	0	0	0	0	1	15900	1	15.9	0	0	0	0.25	6	3.3	45	0	1	1	2	1	0	1	0	0	0	1	0	0	0	0	0	0	1	0	0	0.092107	0	0	0	0
22313	5	1	104	24466	1120.13	0	0	0	0	1	19550	1	19.55	0	0	0	0.3	4	2.1	45	0	1	1	2	1	1	0	0	0	0	1	0	0	0	0	0	0	1	0	0	0.092107	0	0	0	0
22314	5	1	104	24466	1120.13	0	0	0	0	1	39200	1	39.2	0	0	0	0.55	5	2.6	40	0	1	1	2	1	1	0	0	0	0	1	0	0	0	0	0	0	1	0	0	0.092107	0	0	0	0
22315	5	1	104	24466	1120.13	0	1	0	0	0	52800	1	52.8	0	0	0	0.75	4	2.5	64	0	1	1	2	1	1	0	0	0	0	1	0	0	0	0	0	0	1	0	0	0.092107	0	0	0	0
22316	5	1	104	24466	2240.25	0	0	1	0	0	15400	1	15.4	0	0	0	0.25	6	2.7	45	0	1	1	2	0	0	0	1	0	0	1	0	0	0	0	0	0	1	0	0	0.092107	0	0	0	0
22317	5	1	104	24466	2240.25	0	0	1	0	0	19000	1	19	0	0	0	0.3	4	2.1	38	0	1	1	2	0	0	0	1	0	0	1	0	0	0	0	0	0	1	0	0	0.092107	0	0	0	0
22318	5	1	104	24466	2240.25	0	0	1	0	0	20950	1	20.95	0	0	0	0.3	8	3.3	35	0	1	1	2	0	0	0	1	0	0	1	0	0	0	0	0	0	1	0	0	0.092107	0	0	0	0
22319	5	1	104	24466	2240.25	0	0	1	0	0	10900	1	10.9	0	0	0	0.25	5	3	50	0	1	1	2	1	0	0	1	0	0	1	0	0	0	0	0	0	1	0	0	0.092107	0	0	0	0
22320	5	1	104	24467	408	0	0	1	0	0	20530	1	20.53	5	1	0	0.275	7	3.6	58	0	1	1	3	1	1	0	0	0	0	1	0	0	0	0	0	1	1	0	0	0.092107	0	0	0	0
22321	5	1	104	24467	408	0	0	1	0	0	10940	1	10.94	0	0	0	0.175	7	3.4	65	0	12	1	3	0	0	0	0	1	0	1	0	0	0	0	0	1	0	0	0	0.092107	0	0	0	0
22322	5	1	104	24467	408	0	0	1	0	0	940	1	0.94	0	0	0	0.075	7	4	55	0	8	1	3	0	0	0	0	1	0	0	0	0	0	0	1	1	0	0	0	0.092107	0	0	0	0
22323	5	1	104	24467	408	0	0	1	0	0	5800	1	5.8	0	0	0	0.07	4	2.1	37	0	1	1	3	0	0	0	0	1	0	1	0	0	0	0	0	1	1	0	0	0.092107	0	0	0	0
22324	5	1	104	24467	1908	0	0	1	0	0	795	1	0.795	0	0	0	0.025	6	2.9	42	0	6	1	3	1	0	0	0	1	0	0	0	0	0	0	1	1	1	0	0	0.092107	0	0	0	0
22325	5	1	104	24467	1908	0	0	1	0	0	940	0		0	0	1	0.03	8	3.9	55	0	1	1	3		0	0	0	1	0	0	0	0	0	0	0	0	0	0	0	0.092107	0	1	0	1
22326	5	1	104	24467	1908	0	0	1	0	0	2995	0		0	0	0	0.03	6	3.1	37	0	8	1	3	1	0	0	0	1	0	0	0	0	0	0	0	0	0	0	0	0.092107	0	1	0	1
22327	5	1	104	24467	1908	0	0	1	0	0	1460	1	1.46	0	0	0	0.02	5	3	40	0	1	1	3	1	0	0	0	1	0	0	0	0	0	0	0	1	0	0	0	0.092107	0	0	0	0
22433	5	1	104	24490	300	0	0	0	0	1	35340	1	35.34	0	0	0	0.4	7	4	54	0	1	1	2	0	1	0	0	0	0	1	0	0	0	0	0	0	1	0	0	0.092107	0	0	0	0
22434	5	1	104	24490	300	0	0	0	0	1	26140	1	26.14	0	0	0	0.3	6	3.5	48	0	1	1	1	0	1	0	0	0	0	1	0	0	0	0	0	0	1	0	0	0.092107	0	0	0	0
22435	5	1	104	24490	300	0	0	0	0	1	29790	1	29.79	0	0	0	0.35	6	2.9	38	0	1	1	2	0	1	0	0	0	0	1	0	0	0	0	0	0	1	0	0	0.092107	0	0	0	0
22436	5	1	104	24490	300	0	0	0	0	1	43620	1	43.62	0	0	0	0.4	7	3.6	48	0	1	1	2	0	1	0	0	0	0	1	0	0	0	0	0	0	0	0	1	0.092107	0	0	0	0
22437	5	1	104	24490	3024	0	0	0	0	1	46890	1	46.89	0	0	0	0.45	7	3.8	46	0	7	1	2	0	0	0	0	1	0	1	0	0	0	0	0	0	1	0	0	0.092107	0	0	0	0
22438	5	1	104	24490	3024	0	0	0	0	1	66140	1	66.14	0	0	0	0.6	10	4.5	75	0	1	1	3	0	0	0	0	1	0	1	0	0	0	0	0	0	1	0	0	0.092107	0	0	0	0
22439	5	1	104	24490	3024	0	0	0	0	1	64020	1	64.02	0	0	0	0.55	5	3	50	0	1	1	2	0	1	0	0	0	0	1	0	0	0	0	0	0	1	0	0	0.092107	0	0	0	0
22440	5	1	104	24490	3024	0	0	0	0	1	35720	1	35.72	0	0	0	0.3	6	2.9	50	0	1	1	2	0	1	0	0	0	0	1	0	0	0	0	0	0	1	0	0	0.092107	0	0	0	0
22441	5	1	104	24491	164	0	0	1	0	0	10500	1	10.5	0	0	0	0.26	4	2.5	70	0	1	1	2		1	0	0	0	0	1	0	0	0	0	0	0	1	0	0	0.092107	0	0	0	0
22442	5	1	104	24491	164	0	0	0	0	1	5300	1	5.3	0	0	0	0.3	4	2.5	56	0	1	1	2		0	0	0	1	0	1	0	0	0	0	0	0	1	0	0	0.092107	0	0	0	0
22443	5	1	104	24491	164	0	0	1	0	0	17280	1	17.28	0	0	0	0.367	7	4	38	0	5	1	2		1	0	0	0	0	1	0	0	0	1	0	0	1	0	0	0.092107	0	0	0	0
22444	5	1	104	24491	164	0	0	0	0	1	15040	1	15.04	0	0	0	0.36	4	2.5	45	0	1	1	2		0	0	1	0	0	1	0	0	0	0	0	0	1	0	0	0.092107	0	0	0	0
22445	5	1	104	24491	164	0	0	0	0	1	9800	1	9.8	0	0	0	0.175	4	2.1	38	0	1	1	2		1	0	0	0	0	1	0	0	0	0	0	0	1	0	1	0.092107	0	0	0	0
22446	5	1	104	24491	164	0	0	0	0	1	12250	1	12.25	0	0	0	0.3	5	2.4	38	0	7	1	3		1	0	0	0	0	1	0	0	0	0	0	0	1	0	1	0.092107	0	0	0	0
22447	5	1	104	24491	164	0	0	1	0	0	4900	1	4.9	0	0	0	0.15	6	3.1	43	0	7	1	3		1	0	0	0	0	1	0	0	0	0	0	0	1	0	0	0.092107	0	0	0	0
22448	5	1	104	24491	164	0	0	0	0	1	9200	1	9.2	0	0	0	0.3	8	4.1	70	0	1	1	3		1	0	0	0	0	1	0	0	0	0	0	0	1	0	0	0.092107	0	0	0	0
22465	5	1	104	24495	824	0	0	1	0	0	13600	1	13.6	0	0	0	0.4	3	2	72	0	12	1	3	0	0	0	0	0	1	1	0	0	0	0	1	1	0	0	0	0.092107	0	0	0	0
22466	5	1	104	24495	824	0	0	1	0	0	37480	1	37.48	0	0	0	1	9	4.4	62	0	1	1	3	0	0	0	0	1	0	1	0	0	0	0	1	1	1	0	0	0.092107	0	0	0	0
22467	5	1	104	24495	824	0	0	1	0	0	-20	1	-0.02	0	0	0	0.125	5	2.6	43	0	7	1	3	0	0	0	1	0	0	0	0	0	0	0	0	1	1	0	0	0.092107	0	0	0	0
22468	5	1	104	24495	51.5	0	0	1	0	0	110390	1	110.39	0	0	0	2.427	10	4.9	42	0	12	1	3	0	0	0	0	1	0	1	0	0	0	0	0	1	1	0	0	0.092107	0	0	0	0
22469	5	1	104	24495	51.5	0	0	1	0	0	44230	1	44.23	0	0	0	1.367	8	4.1	33	0	1	1	3	0	1	0	0	0	0	1	0	0	0	0	0	1	1	0	0	0.092107	0	0	0	0
22470	5	1	104	24495	1236	0	0	1	0	0	55770	1	55.77	0	0	0	0.7	7	3.8	52	0	1	1	3	0	0	0	0	1	0	1	0	0	0	0	1	1	1	0	0	0.092107	0	0	0	0
22471	5	1	104	24495	1236	0	0	1	0	0	3900	1	3.9	0	0	0	0.15	10	4.9	55	0	1	1	3	0	0	0	1	0	0	1	0	0	0	0	0	1	0	0	0	0.092107	0	0	0	0
22472	5	1	104	24495	1236	0	0	1	0	0	575	1	0.575	0	0	0	0.062	5	2.4	32	0	5	1	3	0	0	0	1	0	0	0	0	0	0	0	0	1	0	0	0	0.092107	0	0	0	0
22328	5	1	105	24468	259	0	0	0	0	1	76740	1	76.74	0	0	0	0.506	5	2.6	40	0	7	1	2	1	1	0	0	0	0	1	0	0	0	0	1	1	1	0	0	0.379586	1	0	1	0
22329	5	1	105	24468	259	0	0	0	0	1	17765	1	17.765	12	1	0	0.202	4	2.1	30	0	7	1	3	1	0	0	0	1	0	1	0	0	0	0	1	1	1	0	0	0.379586	1	0	1	0
22330	5	1	105	24468	8223.25	0	0	0	0	1	47350	1	47.35	0	0	0	0.454	4	2.5	65	0	1	1	3	0	1	0	0	0	0	1	0	0	0	0	1	1	1	0	0	0.379586	1	0	1	0
22331	5	1	105	24468	8223.25	0	0	0	0	1	139325	1	139.325	0	0	0	0.708	4	2.5	52	0	8	1	3	0	0	0	0	1	0	1	0	0	1	1	0	1	1	0	1	0.379586	1	0	1	0
22332	5	1	105	24468	388.5	0	0	0	0	1	198725	1	198.725	0	0	0	1.214	11	5.6	66	0	1	1	3	0	1	0	0	0	0	1	0	0	0	1	1	1	1	0	0	0.379586	1	0	1	0
22333	5	1	105	24468	388.5	0	0	0	0	1	256800	1	256.8	0	0	0	1.407	12	5.7	80	0	1	1	3	0	1	0	0	0	0	1	0	0	1	1	0	1	1	0	1	0.379586	1	0	1	0
22334	5	1	105	24468	388.5	0	0	0	0	1	20255	1	20.255	16	1	0	0.202	9	4.4	61	0	1	1	3	0	1	0	0	0	0	1	0	0	0	0	1	1	1	0	0	0.379586	1	0	1	0
22335	5	1	105	24468	388.5	0	0	0	0	1	175625	1	175.625	0	0	0	1.015	6	3.5	60	0	1	1	2		1	0	0	0	0	1	0	0	1	1	0	1	1	0	1	0.379586	1	0	1	0
22361	5	1	105	24474	724.5	0	0	0	0	1	133020	1	133.02	9	1	0	0.607	8	3.9	35	0	12	1	3	0	1	0	0	0	0	1	0	0	0	1	1	1	1	0	1	0.379586	1	0	1	0
22362	5	1	105	24474	724.5	0	0	0	0	1	43210	1	43.21	10	1	0	0.304	6	3.5	56	0	12	1	3	0	1	0	0	0	0	1	0	0	0	1	0	1	1	0	1	0.379586	1	0	1	0
22363	5	1	105	24474	724.5	0	0	0	0	1	35970	1	35.97	5	1	0	0.394	5	3	52	0	12	1	3	0	1	0	0	0	0	1	0	0	1	0	1	1	1	0	0	0.379586	1	0	1	0
22364	5	1	105	24474	6394.5	0	0	0	0	1	130540	1	130.54	9	1	0	0.607	8	4.5	52	0	13	1	3	0	0	0	0	1	0	1	0	0	0	1	1	1	1	0	1	0.379586	1	0	1	0
22365	5	1	105	24474	6394.5	0	0	0	0	1	40420	1	40.42	9	1	0	0.304	5	3	55	0	1	1	3	0	1	0	0	0	0	1	0	0	0	1	0	1	1	0	1	0.379586	1	0	1	0
22366	5	1	105	24474	220.5	0	0	0	0	1	59320	1	59.32	9	1	0	1.113	7	4	50	0	12	1	3	0	1	0	0	0	0	1	0	0	1	1	0	1	1	0	1	0.379586	1	0	1	0
22367	5	1	105	24474	220.5	0	0	0	0	1	53290	1	53.29	9	1	1	1.037	5	3	44	0	8	1	2	0	1	0	0	0	0	1	0	0	0	1	1	1	1	0	1	0.379586	1	0	1	0
22368	5	1	105	24474	220.5	0	0	0	0	1	68960	1	68.96	9	1	0	1.215	2	1.5	62	0	12	1	3	0	1	0	0	0	0	1	0	0	0	1	1	1	1	0	1	0.379586	1	0	1	0
22449	5	1	105	24493	630	0	0	0	0	1	2650	1	2.65	6	1	0	0.101	4	2.5	55	0	8	1	3	0	0	0	0	1	0	0	0	0	1	0	1	1	0	0	0	0.379586	1	0	1	0
22450	5	1	105	24493	630	0	0	0	0	1	30560	1	30.56	4	1	0	0.101	5	3	38	0	12	1	3	0	0	0	0	1	0	1	0	0	1	1	0	1	0	0	1	0.379586	1	0	1	0
22451	5	1	105	24493	630	0	0	0	0	1	47280	1	47.28	8	1	0	0.405	10	5.3	56	0	10	1	3	0	0	0	0	1	0	1	0	0	0	1	0	1	0	0	1	0.379586	1	0	1	0
22452	5	1	105	24493	2520	0	0	0	0	1	15828	1	15.828	0	0	0	0.202	5	2.4	38	0	12	1	3	0	0	0	0	1	0	1	0	0	0	0	0	1	0	0	1	0.379586	1	0	1	0
22453	5	1	105	24493	2520	0	0	0	0	1	15938	1	15.938	4	1	0	0.153	5	3	48	0	5	1	3	0	1	0	0	0	0	1	0	0	0	0	0	1	0	0	1	0.379586	1	0	1	0
22454	5	1	105	24493	126	0	0	0	0	1	108720	1	108.72	3	1	0	1.25	18	8.1	72	0	1	1	3	0	1	0	0	0	0	1	0	0	0	0	1	1	1	0	1	0.379586	1	0	1	0
22455	5	1	105	24493	126	0	0	0	0	1	133370	1	133.37	4	1	0	1.25	7	3.8	50	0	7	1	3	0	1	0	0	0	0	1	0	0	1	0	1	1	1	0	1	0.379586	1	0	1	0
22456	5	1	105	24493	126	0	0	0	0	1	82100	1	82.1	4	1	0	2.168	15	7.6	64	0	1	1	3	0	1	0	0	0	0	1	0	0	0	1	0	1	0	0	1	0.379586	1	0	1	0
22497	5	1	105	24499	1489.25	0	0	0	0	1	4710	1	4.71	0	0	0	0.051	9	4.8	60	0	1	1	2	1	0	0	0	1	0	0	0	0	1	0	1	1	0	0	0	0.379586	1	0	1	0
22498	5	1	105	24499	1489.25	0	0	0	0	1	84500	1	84.5	0	0	0	0.304	6	3.3	45	0	8	1	3	0	0	0	0	1	0	1	0	0	1	1	1	1	0	0	1	0.379586	1	0	1	0
22499	5	1	105	24499	1489.25	0	0	0	0	1	37250	1	37.25	0	0	0	0.379	6	3.5	49	0	1	1	1		1	0	0	0	0	1	0	0	1	0	1	1	0	0	1	0.379586	1	0	1	0
22500	5	1	105	24499	1489.25	0	0	0	0	1	16900	1	16.9	0	0	0	0.127	7	4	55	0	1	1	2	1	0	0	0	1	0	1	0	0	1	0	1	1	0	0	1	0.379586	1	0	1	0
22501	5	1	105	24499	1489.25	0	0	0	0	1	117575	1	117.575	14	1	0	0.961	8	4.5	58	0	8	1	3	0	0	0	0	1	0	1	0	0	0	1	1	1	1	0	0	0.379586	1	0	1	0
22502	5	1	105	24499	1489.25	0	0	0	0	1	47250	1	47.25	10	1	0	0.455	6	3.3	53	0	1	1	2	0	1	0	0	0	0	1	0	0	0	0	0	1	1	0	1	0.379586	1	0	1	0
22503	5	1	105	24499	129.5	0	0	0	0	1	498905	1	498.905	13	1	0	1.732	4	2.5	58	0	10	1	3	1	1	0	0	0	0	1	0	0	0	1	0	1	1	0	1	0.379586	1	0	1	0
22504	5	1	105	24499	129.5	1	0	0	0	0	405100	1	405.1	0	0	0	1.77	13	6.2	44	0	10	1	3	0	0	0	0	1	0	1	0	0	1	1	1	1	1	0	0	0.379586	1	0	1	0
22344	5	1	106	24471	612.25	0	0	0	0	1	38760	1	38.76	0	0	0	0.6	7	3.4	63	0	1	1	3	1	0	0	0	1	0	1	0	0	0	0	0	0	1	0	0	0.454209	1	0	0	0
22345	5	1	106	24471	612.25	0	0	0	0	1	27280	1	27.28	0	0	0	0.35	4	2.3	40	0	7	1	2	1	1	0	0	0	0	1	0	0	0	0	0	0	1	0	0	0.454209	1	0	0	0
22346	5	1	106	24471	612.25	0	0	0	0	1	18820	1	18.82	0	0	0	0.25	5	3	46	0	7	1	3	0	0	0	1	0	0	1	0	0	0	0	0	0	1	0	0	0.454209	1	0	0	0
22347	5	1	106	24471	612.25	0	0	0	0	1	22100	1	22.1	0	0	0	0.3	5	2.8	48	0	1	1	2	1	1	0	0	0	0	1	0	0	0	0	0	0	1	0	0	0.454209	1	0	0	0
22348	5	1	106	24471	2024.38	0	0	0	0	1	11040	1	11.04	0	0	0	0.2	2	1.5	80	0	1	1	2	1	1	0	0	0	0	1	0	0	0	0	0	0	1	0	0	0.454209	1	0	0	0
22349	5	1	106	24471	2024.38	0	0	0	0	1	36400	1	36.4	0	0	0	0.45	6	3.5	62	0	1	1	3	0	0	0	1	0	0	1	0	0	0	0	0	0	1	0	0	0.454209	1	0	0	0
22350	5	1	106	24471	2024.38	0	0	0	0	1	13840	1	13.84	0	0	0	0.2	7	3.8	65	0	1	1	3	1	0	0	1	0	0	1	0	0	0	0	0	0	1	0	0	0.454209	1	0	0	0
22351	5	1	106	24471	2024.38	0	0	0	0	1	19020	1	19.02	0	0	0	0.25	10	4.9	67	0	5	1	3	0	0	0	0	1	0	1	0	0	0	0	0	0	1	0	0	0.454209	1	0	0	0
22352	5	1	106	24472	8910	0	0	0	0	1	37955	1	37.955	0	0	0	0.225	6	3.1	41	0	7	1	3	1	0	0	1	0	0	0	0	0	0	1	0	1	0	0	0	0.454209	1	0	0	0
22353	5	1	106	24472	110	0	0	0	0	1	277325	1	277.325	11	1	0	1.415	6	3.1	42	0	8	1	3	0	1	0	0	0	0	1	0	0	0	1	0	1	1	0	0	0.454209	1	0	0	0
22354	5	1	106	24472	4986.67	0	0	0	0	1	41537	1	41.537	10	1	0	0.303	5	3	66	0	1	1	3	0	0	0	0	0	1	0	0	0	0	1	0	1	0	0	0	0.454209	1	0	0	0
22355	5	1	106	24472	4986.67	0	0	0	0	1	46550	1	46.55	0	0	0	0.257	5	2.8	60	0	1	1	2	1	1	0	0	0	0	1	0	0	1	1	1	1	1	0	0	0.454209	1	0	0	0
22356	5	1	106	24472	4986.67	0	0	0	0	1	68395	1	68.395	12	1	0	0.202	5	3	48	0	7	1	3	0	0	0	1	0	0	0	0	0	0	1	1	1	0	0	0	0.454209	1	0	0	0
22357	5	1	106	24472	220	0	0	0	0	1	360600	1	360.6	0	0	0	1.123	5	2.8	48	0	8	1	3	0	0	0	0	1	0	1	0	0	1	1	0	1	1	0	0	0.454209	1	0	0	0
22358	5	1	106	24472	220	0	0	0	0	1	267475	1	267.475	0	0	0	1.107	7	4	48	0	7	1	3	0	1	0	0	0	0	1	0	0	1	1	1	1	1	0	1	0.454209	1	0	0	0
22359	5	1	106	24472	220	0	0	0	0	1	182750	1	182.75	0	0	0	1.024	7	3.4	70	0	6	1	3	0	0	0	0	1	0	1	0	0	1	1	1	1	1	0	1	0.454209	1	0	0	0
22369	5	1	106	24475	344.25	0	0	0	0	1	43825	1	43.825	0	0	0	0.429	6	3.1	56	0	1	1	2	0	1	0	0	0	0	1	0	0	1	0	1	1	1	0	0	0.454209	1	0	0	0
22370	5	1	106	24475	344.25	0	0	0	0	1	18375	1	18.375	0	0	0	0.239	6	3.1	57	0	1	1	3	1	1	0	0	0	0	1	0	0	1	0	1	1	1	0	0	0.454209	1	0	0	0
22371	5	1	106	24475	344.25	0	0	0	0	1	25425	1	25.425	0	0	0	0.276	6	3.1	58	0	6	1	2	1	0	0	1	0	0	1	0	0	1	0	1	1	1	0	0	0.454209	1	0	0	0
22372	5	1	106	24475	344.25	0	0	0	0	1	10820	1	10.82	0	0	0	0.15	4	2.5	65	0	5	1	2	0	0	0	0	1	0	1	0	0	1	0	1	1	1	0	0	0.454209	1	0	0	0
22373	5	1	106	24475	2792.25	0	0	0	0	1	15475	1	15.475	0	0	0	0.158	5	3	51	0	8	1	2	1	0	0	1	0	0	1	0	0	1	0	1	1	1	0	0	0.454209	1	0	0	0
22374	5	1	106	24475	2792.25	0	0	0	0	1	7125	1	7.125	0	0	0	0.098	6	3.3	58	0	8	1	3	0	0	0	1	0	0	1	0	0	1	0	1	1	1	0	0	0.454209	1	0	0	0
22375	5	1	106	24475	2792.25	0	0	0	0	1	32650	1	32.65	0	0	0	0.336	6	3.3	45	0	8	1	3	0	0	0	0	1	0	1	0	0	1	0	1	1	1	0	0	0.454209	1	0	0	0
22376	5	1	106	24475	2792.25	0	0	0	0	1	13600	1	13.6	0	0	0	0.153	7	3.8	78	0	1	1	3	0	0	0	0	1	0	1	0	0	1	0	1	1	1	0	0	0.454209	1	0	0	0
22473	5	1	106	24496	1650	0	0	0	0	1	61112	1	61.112	0	0	0	0.506	4	2.1	40	0	5	1	2	0	0	0	1	0	0	1	0	0	1	0	1	1	1	0	1	0.454209	1	0	0	0
22474	5	1	106	24496	1650	0	0	0	0	1	39675	1	39.675	0	0	0	0.304	6	3.3	80	0	1	1	2	1	1	0	0	0	0	1	0	0	0	0	1	1	0	0	1	0.454209	1	0	0	0
22475	5	1	106	24496	1650	0	0	0	0	1	13185	1	13.185	0	0	0	0.202	5	2.6	41	0	10	1	3	0	0	0	0	1	0	1	0	0	1	0	0	1	0	0	1	0.454209	1	0	0	0
22476	5	1	106	24496	1650	0	0	0	0	1	49630	1	49.63	0	0	0	0.506	11	5.6	70	0	1	1	3	0	0	0	1	0	0	1	0	0	1	0	0	1	1	0	1	0.454209	1	0	0	0
22477	5	1	106	24496	2805	0	0	0	0	1	13845	1	13.845	0	0	0	0.253	6	3.3	45	0	1	1	3	0	0	0	0	1	0	1	0	0	1	0	1	1	0	0	1	0.454209	1	0	0	0
22478	5	1	106	24496	2805	0	0	0	0	1	60000	1	60	0	0	0	0.354	7	3.4	37	0	7	1	1	0	1	0	0	0	0	1	0	0	1	0	0	1	0	0	1	0.454209	1	0	0	0
22479	5	1	106	24496	2805	0	0	0	0	1	80910	1	80.91	0	0	0	0.607	6	3.5	68	0	5	1	2	0	1	0	0	0	0	1	0	0	1	0	1	1	1	0	0	0.454209	1	0	0	0
22480	5	1	106	24496	2805	0	0	0	0	1	31490	1	31.49	0	0	0	0.506	5	2.8	45	0	1	1	2	0	1	0	0	0	0	1	0	0	1	0	1	1	1	0	0	0.454209	1	0	0	0
22481	5	1	106	24497	2567.5	0	0	0	0	1	33175	1	33.175	4	1	0	0.202	7	3.4	57	0	5	1	3	1	1	0	0	0	0	1	0	0	0	0	1	1	0	0	0	0.454209	1	0	0	0
22482	5	1	106	24497	59.25	0	0	0	0	1	137659	1	137.659	4	1	0	1.212	7	3.8	59	0	8	1	3	0	1	0	0	0	0	1	0	0	0	0	0	1	1	0	0	0.454209	1	0	0	0
22483	5	1	106	24497	59.25	0	0	0	0	1	85220	1	85.22	2	1	0	0.505	10	4.9	61	0	1	1	3	0	1	0	0	0	0	1	0	0	0	1	0	1	1	0	1	0.454209	1	0	0	0
22484	5	1	106	24497	39.5	0	0	0	0	1	298490	1	298.49	2	1	0	2.169	18	7.7	62	0	5	1	3	0	1	0	0	0	0	1	0	0	1	1	0	1	0	0	1	0.454209	1	0	0	0
22485	5	1	106	24497	5135	0	0	0	0	1	18850	1	18.85	4	1	1	0.101	7	3	29	0	1	1	3	1	1	0	0	0	0	1	0	0	1	0	0	1	0	0	1	0.454209	1	0	0	0
22486	5	1	106	24497	5135	0	0	0	0	1	63550	1	63.55	2	1	0	0.506	8	4.3	47	0	8	1	3	0	1	0	0	0	0	1	0	0	1	1	1	1	0	0	0	0.454209	1	0	0	0
22487	5	1	106	24497	5135	0	0	0	0	1	27560	1	27.56	4	1	0	0.202	7	3.4	41	0	1	1	3	0	1	0	0	0	0	1	0	0	1	0	1	1	0	0	0	0.454209	1	0	0	0
22488	5	1	106	24497	237	0	0	0	0	1	16230	1	16.23	2	1	0	0.126	6	3.3	22	0	7	1	3	1	1	0	0	0	0	1	0	0	0	0	1	1	0	0	0	0.454209	1	0	0	0
22489	5	1	106	24498	1292	0	0	1	0	0	139275	1	139.275	0	0	0	0.556	6	2.9	40	0	8	1	3	1	1	0	0	0	0	1	0	0	0	1	1	1	0	0	1	0.454209	1	0	0	0
22490	5	1	106	24498	17	0	0	1	0	0	613520	0		2	1	0	1.374	6	3.5	54	0	8	1	3	0	1	0	0	0	0	1	0	0	0	1	0	1	1	0	1	0.454209	0	1	0	1
22491	5	1	106	24498	9248	0	0	1	0	0	65790	1	65.79	0	0	0	0.354	5	2.8	40	0	1	1	3	1	1	0	0	0	0	1	0	0	0	1	0	1	1	0	1	0.454209	1	0	0	0
22492	5	1	106	24498	136	0	0	0	0	1	486190	1	486.19	0	0	0	1.413	7	4	62	0	8	1	3	0	1	0	0	0	0	1	0	0	0	1	1	1	1	0	1	0.454209	1	0	0	0
22493	5	1	106	24498	136	0	0	1	0	0	739265	0		5	1	0	1.214	10	5.1	70	0	8	1	3	0	0	0	0	1	0	1	0	0	0	1	1	1	0	0	1	0.454209	0	1	0	1
22494	5	1	106	24498	136	0	0	1	0	0	178030	1	178.03	0	0	0	0.86	11	5.6	65	1	1	1	3	0	1	0	0	0	0	1	0	0	0	1	0	1	0	0	1	0.454209	1	0	0	0
22495	5	1	106	24498	136	0	0	1	0	0	517620	1	517.62	0	0	0	1.851	6	3.5	55	0	8	1	3	0	1	0	0	0	0	1	0	0	0	1	0	1	1	0	1	0.454209	1	0	0	0
22496	5	1	106	24498	136	0	0	1	0	0	158540	1	158.54	0	0	0	0.763	9	4.4	58	0	7	1	3	0	1	0	0	0	0	1	0	0	0	1	0	1	0	0	1	0.454209	1	0	0	0
22064	5	1	107	24434	144	0	1	0	0	0	670	1	0.67	0	0	0	0.506	4	2.5	44	0	12	1	2	1	0	0	0	1	0	1	1	0	0	0	0	1	1	0	1	0	0	1	0	0
22065	5	1	107	24434	144	0	1	0	0	0	-170	1	-0.17	0	0	0	0.253	6	3.3	70	0	1	1	3	0	0	0	0	0	0	1	0	0	0	0	0	1	1	0	1	0	0	1	0	0
22066	5	1	107	24434	144	0	1	0	0	0	6050	1	6.05	0	0	0	0.506	7	3.8	55	0	1	1	2	1	0	0	0	0	0	1	1	0	0	0	0	1	1	0	1	0	0	1	0	0
22067	5	1	107	24434	144	0	1	0	0	0	6040	1	6.04	0	0	0	0.506	5	2.8	52	0	10	1	2	0	0	0	0	1	0	1	1	0	0	0	0	1	1	0	1	0	0	1	0	0
22068	5	1	107	24434	144	0	1	0	0	0	2280	1	2.28	0	0	0	0.202	1	1	40	0	7	1	1		0	0	0	0	1	1	1	0	0	0	0	1	1	0	1	0	0	1	0	0
22069	5	1	107	24434	144	0	1	0	0	0	4680	1	4.68	0	0	0	0.277	5	3	65	0	10	1	2	0	0	0	0	1	0	1	1	0	0	0	0	1	1	0	1	0	0	1	0	0
22070	5	1	107	24434	54	0	1	0	0	0	7460	1	7.46	0	0	0	1.113	10	4.7	65	0	1	1	2	0	0	0	0	1	0	1	1	0	0	0	0	1	1	0	1	0	0	1	0	0
22071	5	1	107	24434	54	0	1	0	0	0	5740	1	5.74	0	0	0	1.62	5	3	78	0	1	1	2	1	0	0	0	1	0	1	1	0	0	0	0	1	1	0	1	0	0	1	0	0
22336	5	1	107	24470	904.5	0	1	0	0	0	20275	1	20.275	0	0	0	0.708	4	2.5	50	0	1	1	2	0	0	0	0	0	0	1	0	0	0	1	0	1	1	0	1	0	0	1	0	0
22337	5	1	107	24470	904.5	0	1	0	0	0	27840	1	27.84	0	0	0	0.607	4	2.5	58	0	1	1	2	0	0	0	0	0	0	1	0	0	0	1	0	1	1	0	1	0	0	1	0	0
22338	5	1	107	24470	904.5	0	1	0	0	0	11600	1	11.6	0	0	0	0.404	5	3	54	0	8	1	3	0	0	0	0	1	0	1	0	0	0	1	1	1	1	0	1	0	0	1	0	0
22339	5	1	107	24470	904.5	0	1	0	0	0	20460	1	20.46	6	1	0	0.759	4	2.5	59	0	1	1	3	0	0	0	0	0	0	1	0	0	0	1	1	1	1	0	1	0	0	1	0	0
22340	5	1	107	24470	1377	0	1	0	0	0	20580	1	20.58	0	0	0	0.607	3	2	42	1	1	1	2	1	0	0	0	0	0	1	0	0	0	1	0	1	1	0	1	0	0	1	0	0
22341	5	1	107	24470	1377	0	1	0	0	0	11750	1	11.75	0	0	0	0.809	4	2.5	52	0	1	1	2	0	0	0	0	1	0	1	0	0	0	1	0	1	1	0	1	0	0	1	0	0
22342	5	1	107	24470	1377	0	1	0	0	0	18380	1	18.38	0	0	0	0.809	4	2.5	58	0	1	1	2	1	0	0	0	0	0	1	0	0	0	1	0	1	1	0	1	0	0	1	0	0
22343	5	1	107	24470	1377	0	1	0	0	0	13930	1	13.93	0	0	0	0.455	4	2.5	63	0	1	1	2	0	0	0	0	0	0	1	0	0	0	1	0	1	1	0	1	0	0	1	0	0
22048	5	1	108	24432	838.5	0	1	0	0	0	12320	1	12.32	0	0	0	0.55	10	5.5	75	0	1	1	2	1	0	0	0	1	0	1	1	0	0	0	0	0	0	0	1	0	0	1	0	0
22049	5	1	108	24432	838.5	0	1	0	0	0	18720	1	18.72	0	0	0	0.85	8	4.5	70	0	1	1	2	1	0	0	0	0	0	1	1	0	0	0	0	0	0	0	1	0	0	1	0	0
22050	5	1	108	24432	838.5	0	1	0	0	0	8200	1	8.2	0	0	0	0.35	6	3.1	45	0	6	1	2	1	0	0	0	0	0	1	0	0	0	0	0	0	0	0	1	0	0	1	0	0
22051	5	1	108	24432	838.5	0	1	0	0	0	9950	1	9.95	0	0	0	0.45	10	5.1	65	0	1	1	2	1	0	0	0	1	0	1	0	0	0	0	0	0	0	0	1	0	0	1	0	0
22052	5	1	108	24432	1419	0	1	0	0	0	9900	1	9.9	0	0	0	0.8	10	5.1	50	0	7	1	2	1	0	0	0	0	0	1	0	0	0	0	0	0	0	0	1	0	0	1	0	0
22053	5	1	108	24432	1419	0	1	0	0	0	6400	1	6.4	0	0	0	0.375	9	4.6	50	0	1	1	2	1	0	0	0	1	0	1	0	0	0	0	0	0	0	0	1	0	0	1	0	0
22054	5	1	108	24432	1419	0	1	0	0	0	6400	1	6.4	0	0	0	0.7	10	4.9	85	0	1	1	2	1	0	0	0	0	0	1	0	0	0	0	0	0	0	0	1	0	0	1	0	0
22055	5	1	108	24432	1419	0	1	0	0	0	7250	1	7.25	0	0	0	0.3	5	2.4	49	0	5	1	2	1	0	0	0	0	0	1	0	0	0	0	0	0	0	0	1	0	0	1	0	0
22401	5	1	108	24479	757.88	0	1	0	0	0	12800	1	12.8	0	0	0	0.65	4	2.5	74	0	1	1	2	0	0	0	0	1	0	1	0	0	0	0	0	1	0	0	1	0	0	1	0	0
22402	5	1	108	24479	757.88	0	1	0	0	0	18250	1	18.25	0	0	0	0.75	8	3.9	40	0	7	1	3	1	0	0	0	1	0	1	0	0	0	0	0	1	0	0	1	0	0	1	0	0
22403	5	1	108	24479	757.88	0	1	0	0	0	13750	1	13.75	0	0	0	0.45	3	1.6	30	1	10	1	2	0	0	0	0	1	0	1	0	0	0	0	0	1	0	0	1	0	0	1	0	0
22404	5	1	108	24479	757.88	0	1	0	0	0	11000	1	11	0	0	0	0.5	5	3	45	0	8	1	2	0	0	0	0	1	0	1	0	0	0	0	0	1	0	0	1	0	0	1	0	0
22405	5	1	108	24479	2902.5	0	1	0	0	0	9100	1	9.1	0	0	0	0.95	5	2.8	42	0	12	1	2	0	0	0	0	1	0	1	0	0	0	0	0	1	0	0	1	0	0	1	0	0
22406	5	1	108	24479	2902.5	0	1	0	0	0	8900	1	8.9	0	0	0	1.025	4	2.5	50	0	10	1	2	0	0	0	0	0	1	1	0	0	0	0	0	1	0	0	1	0	0	1	0	0
22407	5	1	108	24479	2902.5	0	1	0	0	0	1700	1	1.7	0	0	0	0.325	14	6.3	57	0	8	1	1	0	0	0	0	1	0	1	0	0	0	0	0	1	0	0	1	0	0	1	0	0
22408	5	1	108	24479	2902.5	0	1	0	0	0	-100	1	-0.1	0	0	0	0.25	4	2.3	45	0	8	1	1	0	0	0	0	1	0	1	0	0	0	0	0	1	0	0	1	0	0	1	0	0
21873	5	1	109	24410	1088	0	0	0	0	1	18000	1	18	0	0	0	0.376	4	2.5	63	0	8	1	3	0	0	0	0	0	1	1	0	0	0	0	0	0	0	0	0	0.023179	1	0	1	0
21874	5	1	109	24410	124.67	0	0	0	0	1	39770	1	39.77	5	1	0	1.012	10	4.7	77	0	7	1	1	0	1	0	0	0	0	1	0	0	0	0	0	0	0	0	0	0.023179	1	0	1	0
21875	5	1	109	24410	124.67	0	0	0	0	1	18150	1	18.15	5	1	0	1.063	4	2.5	60	0	7	1	3	0	1	0	0	0	0	1	0	0	0	0	0	0	0	0	0	0.023179	1	0	1	0
21876	5	1	109	24410	124.67	1	0	0	0	0	18500	1	18.5	0	0	0	0.667	4	1.9	33	1	8	1	3	0	0	0	0	0	1	1	0	0	0	0	0	0	0	0	0	0.023179	1	0	1	0
21877	5	1	109	24410	4420	0	0	0	0	1	2758	1	2.758	5	1	0	0.152	5	3	46	0	10	1	2	0	0	0	0	0	0	1	0	0	0	0	0	0	0	0	0	0.023179	1	0	1	0
21878	5	1	109	24410	170	1	0	0	0	0	46200	1	46.2	5	1	0	1.063	3	2	65	0	8	1	3	0	1	0	0	0	0	1	0	0	0	0	0	0	0	0	0	0.023179	1	0	1	0
21879	5	1	109	24410	170	0	0	0	0	1	38950	1	38.95	6	1	1	2.804	6	3.5	85	0	6	1	3	0	0	0	1	0	0	1	0	0	0	0	0	1	0	0	0	0.023179	1	0	1	0
21880	5	1	109	24410	170	0	0	0	0	1	38450	1	38.45	9	1	0	1.985	4	2.3	52	0	8	1	3	0	0	0	0	1	0	1	0	0	0	0	0	0	0	0	0	0.023179	1	0	1	0
21912	5	1	109	24415	169	0	0	0	0	1	incomplete data	0				1	0.003	4	2.3	26	0	7	1	1	0	0	0	0	1	0	1	0	0	0	0	0	1	0	0	1	0.023179	0	1	0	1
21913	5	1	109	24415	7436	0	0	0	0	1	33800	1	33.8	0	0	0	0.404	5	2.4	34	0	7	1	1	0	1	0	0	0	0	1	1	0	0	0	1	0	0	0	0	0.023179	1	0	1	0
21914	5	1	109	24415	676	0	0	0	0	1	23750	1	23.75	0	0	0	1.25	1	1	50	0	1	1	2	0	1	0	0	0	0	1	1	0	0	0	0	0	0	0	0	0.023179	1	0	1	0
21915	5	1	109	24415	507	0	0	0	0	1	31250	1	31.25	0	0	0	1.417	4	2.5	40	0	5	1	1	0	1	0	0	0	0	1	1	0	0	0	1	0	0	0	0	0.023179	1	0	1	0
21916	5	1	109	24415	676	0	0	0	0	1	incomplete data	0				1	0.005	4	2.3	23	0	1	1	1	0	0	0	0	1	0	1	1	0	0	0	1	0	0	0	0	0.023179	0	1	0	1
21917	5	1	109	24415	35152	0	0	0	0	1	38250	1	38.25	0	0	0	0.464	4	2.5	40	0	7	1	1		1	0	0	0	0	1	1	0	0	0	0	0	0	0	0	0.023179	1	0	1	0
21918	5	1	109	24415	676	0	0	0	0	1	83000	1	83	0	0	0	1.309	5	2.6	35	0	1	1	1		1	0	0	0	0	1	1	0	0	0	1	0	0	0	0	0.023179	1	0	1	0
21919	5	1	109	24415	676	0	0	0	0	1	39800	1	39.8	0	0	0	1.417	4	2.5	40	0	5	1	1	0	1	0	0	0	0	1	1	0	0	0	1	0	0	0	1	0.023179	1	0	1	0
22120	5	1	109	24441	76.5	0	0	0	0	1	6900	1	6.9	0	0	0	0.152	3	1.6	30	1	7	1	3		0	0	0	0	1	1	0	0	0	0	0	0	0	0	0	0.023179	1	0	1	0
22121	5	1	109	24441	76.5	0	0	0	0	1	14930	1	14.93	0	0	0	0.152	5	2.8	42	0	7	1	3		0	0	0	1	0	1	0	0	0	0	0	0	0	0	0	0.023179	1	0	1	0
22122	5	1	109	24441	76.5	0	0	0	0	1	11200	1	11.2	0	0	0	0.177	7	3.2	40	0	7	1	3	0	0	0	0	1	0	1	0	0	0	0	0	0	0	0	0	0.023179	1	0	1	0
22123	5	1	109	24441	76.5	0	0	0	0	1	20960	1	20.96	0	0	0	0.455	4	2.3	59	0	7	1	3	0	0	0	0	0	1	1	0	0	0	0	0	0	0	0	0	0.023179	1	0	1	0
22124	5	1	109	24441	2057	0	0	0	0	1	950	1	0.95	0	0	0	0.152	7	3.4	75	0	12	1	3	0	0	0	0	1	0	1	0	0	0	0	0	0	0	0	0	0.023179	1	0	1	0
22125	5	1	109	24441	2057	0	0	0	0	1	5978	1	5.978	0	0	0	0.177	6	3.5	70	0	6	1	3	0	0	0	0	1	0	1	0	0	0	0	0	1	0	0	0	0.023179	1	0	1	0
22126	5	1	109	24441	2057	1	0	0	0	0	3230	1	3.23	0	0	0	0.177	4	2.1	40	0	10	1	3	1	1	0	0	0	0	1	0	0	0	0	0	1	0	0	0	0.023179	1	0	1	0
22127	5	1	109	24441	2057	0	0	0	0	1	1480	1	1.48	0	0	0	0.085	5	3	48	0	8	1	3	1	0	0	0	1	0	1	0	0	0	0	0	1	0	0	0	0.023179	1	0	1	0
22128	5	1	109	24442	7774	0	0	0	0	1	1350	1	1.35	0	0	0	0.3	6	3.3	48	0	7	1	3	0	0	0	0	1	0	1	0	0	0	0	0	0	0	0	1	0.023179	1	0	1	0
22129	5	1	109	24442	169	0	0	0	0	1	44100	1	44.1	0	0	0	1.568	7	3.8	80	0	5	1	1	1	1	0	0	0	0	1	1	0	0	0	0	0	0	0	1	0.023179	1	0	1	0
22130	5	1	109	24442	13182	0	0	0	0	1	2400	1	2.4	0	0	0	0.3	3	1.8	35	0	7	1	2	1	0	0	0	1	0	1	0	0	0	0	0	0	0	0	1	0.023179	1	0	1	0
22131	5	1	109	24442	422.5	0	0	0	0	1	24050	1	24.05	0	0	0	1.214	6	3.1	57	0	10	1	1	0	0	0	0	1	0	1	0	0	0	0	0	0	0	0	1	0.023179	1	0	1	0
22132	5	1	109	24442	422.5	0	0	0	0	1	26800	1	26.8	0	0	0	1.718	6	2.9	40	0	7	1	1	1	1	0	0	0	0	1	1	0	0	0	0	0	0	0	1	0.023179	1	0	1	0
22133	5	1	109	24442	422.5	0	0	0	0	1	27850	1	27.85	0	0	0	1.625	8	3.7	70	0	1	1	2	1	1	0	0	0	0	1	0	0	0	0	0	0	0	0	1	0.023179	1	0	1	0
22134	5	1	109	24442	422.5	0	0	0	0	1	12100	1	12.1	0	0	0	1.416	9	4.4	59	0	8	1	2	0	1	0	0	0	0	1	1	0	0	0	0	0	0	0	1	0.023179	1	0	1	0
22135	5	1	109	24442	338	0	0	0	0	1	46450	1	46.45	0	0	0	2.5	8	4.3	75	0	1	1	3	0	1	0	0	0	0	1	0	0	0	0	0	0	0	0	1	0.023179	1	0	1	0
21897	5	1	110	24413	1660	1	0	0	0	0	30650	1	30.65	0	0	0	1.91	8	3.9	60	0	1	1	1	1	0	0	0	1	0	1	0	0	0	0	0	0	1	0	0	0.0388889	0	0	1	0
21898	5	1	110	24413	622.5	0	0	0	0	1	44200	1	44.2	0	0	0	1.771	10	4.9	60	0	1	1	2	0	1	0	0	0	0	1	0	0	0	0	0	0	0	0	0	0.0388889	0	0	1	0
21899	5	1	110	24413	41.5	0	0	0	0	1	64950	1	64.95	0	0	0	2.428	8	3.9	75	0	6	1	2	0	1	0	0	0	0	1	0	0	0	0	0	0	1	0	0	0.0388889	0	0	1	0
21900	5	1	110	24413	41.5	1	0	0	0	0	43750	1	43.75	0	0	0	2.204	11	5.6	60	0	1	1	1	1	0	0	0	1	0	1	0	0	0	0	0	0	1	0	0	0.0388889	0	0	1	0
21901	5	1	110	24413	15064.5	1	0	0	0	0	4120	1	4.12	0	0	0	0.304	4	2.5	55	0	1	1	3	0	0	0	0	1	0	1	0	0	0	0	0	0	1	0	0	0.0388889	0	0	1	0
21902	5	1	110	24413	913	1	0	0	0	0	27000	1	27	0	0	0	1.214	8	4.1	70	0	1	1	3	0	0	0	0	1	0	1	0	0	0	0	0	0	1	0	0	0.0388889	0	0	1	0
21903	5	1	110	24413	913	0	0	0	0	1	35790	1	35.79	0	0	0	4.959	8	4.1	50	0	6	1	3	0	0	0	0	1	0	1	0	0	0	0	0	0	1	0	0	0.0388889	0	0	1	0
21944	5	1	110	24419	591.75	1	0	0	0	0	1890	1	1.89	0	0	0	0.25	6	3.3	42	0	7	1	3	0	0	0	1	0	0	1	0	0	0	0	0	0	0	0	0	0.0388889	0	0	1	0
21945	5	1	110	24419	591.75	0	0	0	0	1	550	1	0.55	0	0	0	0.25	6	3.5	65	0	1	1	2	0	0	0	0	1	0	1	0	0	0	0	0	0	0	0	0	0.0388889	0	0	1	0
21946	5	1	110	24419	591.75	1	0	0	0	0	2260	1	2.26	0	0	0	0.101	5	2.6	45	0	7	1	3	0	0	0	0	1	0	1	0	0	0	0	0	0	0	0	0	0.0388889	0	0	1	0
21947	5	1	110	24419	591.75	0	0	0	0	1	8310	1	8.31	0	0	0	0.6	5	3	62	0	1	1	2	1	0	0	0	1	0	1	0	0	0	0	0	0	0	0	0	0.0388889	0	0	1	0
21948	5	1	110	24419	263	0	0	0	0	1	incomplete data	0				1	0	5	2.6	36	1	5	0	3	0	0	0	0	0	1	1	0	0	0	0	0	0	0	0	0	0.0388889	0	1	0	1
21949	5	1	110	24419	1841	0	0	0	0	1	7372	1	7.372	0	0	0	0.16	5	2.8	49	0	7	1	3		0	0	1	0	0	1	0	0	0	0	0	0	0	0	0	0.0388889	0	0	1	0
21950	5	1	110	24419	1841	0	0	0	0	1	3165	1	3.165	0	0	0	0.087	14	6.5	65	0	7	1	3	0	0	0	1	0	0	1	0	0	0	0	0	1	0	0	0	0.0388889	0	0	1	0
21951	5	1	110	24419	1841	0	0	0	0	1	8820	1	8.82	0	0	0	0.404	8	4.1	62	0	1	1	2	0	0	0	0	1	0	1	0	0	0	0	0	0	0	0	0	0.0388889	0	0	1	0
22112	5	1	110	24440	1660	0	0	0	0	1	22700	1	22.7	0	0	0	0.8	5	3	56	0	1	1	1	0	1	0	0	0	0	1	0	0	0	0	0	0	0	0	0	0.0388889	0	0	1	0
22113	5	1	110	24440	124.5	1	0	0	0	0	18240	1	18.24	0	0	0	1.113	5	2.8	60	0	1	1	1	1	0	0	1	0	0	1	0	0	1	0	0	0	0	0	0	0.0388889	0	0	1	0
22114	5	1	110	24440	21165	0	0	0	0	1	3850	1	3.85	0	0	0	0.126	7	3.6	45	0	1	1	1	1	0	0	0	1	0	1	0	0	1	0	0	0	0	0	0	0.0388889	0	0	1	0
22115	5	1	110	24440	2178.75	0	0	0	0	1	9400	1	9.4	0	0	0	1.518	5	3	48	0	6	1	2	1	1	0	0	0	0	1	0	0	0	0	0	0	0	0	0	0.0388889	0	0	1	0
22116	5	1	110	24440	2178.75	0	0	0	0	1	24050	1	24.05	0	0	0	1.3	9	4	45	0	7	1	2	0	1	0	0	0	0	1	0	0	0	0	0	0	0	0	0	0.0388889	0	0	1	0
22117	5	1	110	24440	622.5	0	1	0	0	0	43282	1	43.282	0	0	0	1.669	9	4.8	50	0	6	1	1	1	1	0	0	0	0	1	0	0	1	0	0	0	0	0	0	0.0388889	0	0	1	0
22118	5	1	110	24440	622.5	0	0	0	0	1	56700	1	56.7	0	0	0	2.024	7	3.4	33	0	6	1	1	1	1	0	0	0	0	1	0	0	0	0	0	0	0	0	0	0.0388889	0	0	1	0
22119	5	1	110	24440	622.5	0	0	0	0	1	80600	1	80.6	0	0	0	2.277	9	4.6	65	0	5	1	1	1	1	0	0	0	0	1	0	0	1	0	0	0	0	0	0	0.0388889	0	0	1	0
22144	5	1	110	24445	6049	1	0	0	0	0	18350	1	18.35	0	0	0	0.404	6	3.3	40	0	8	1	2	0	0	0	0	1	0	1	0	0	0	0	0	0	0	0	0	0.0388889	0	0	1	0
22145	5	1	110	24445	219.16	1	0	0	0	0	incomplete data	0				0	1.568	5	2.4	52	0	4	1	3	0	0	0	0	1	0	1	0	0	0	0	0	0	0	0	0	0.0388889	0	1	0	1
22146	5	1	110	24445	219.16	1	0	0	0	0	25030	1	25.03	0	0	0	1.771	7	4	64	0	1	1	2	0	0	0	0	1	0	1	0	0	1	0	0	1	1	0	1	0.0388889	0	0	1	0
22147	5	1	110	24445	219.16	0	1	0	0	0	11050	1	11.05	0	0	0	1.982	9	4.4	80	0	1	1	3	0	1	0	0	0	0	1	0	0	0	0	0	0	0	0	0	0.0388889	0	0	1	0
22148	5	1	110	24445	12492.5	1	0	0	0	0	7400	1	7.4	0	0	0	0.353	5	2.8	48	0	6	1	2	0	0	0	0	1	0	1	0	0	0	0	0	0	0	0	1	0.0388889	0	0	1	0
22149	5	1	110	24445	657.5	0	0	0	0	1	36700	1	36.7	4	1	0	8.957	5	3	70	0	7	1	3	0	1	0	0	0	0	1	0	0	0	0	0	1	0	0	0	0.0388889	0	0	1	0
22150	5	1	110	24445	657.5	1	0	0	0	0	30860	1	30.86	0	0	0	1.619	6	3.5	49	0	13	1	3	0	0	0	0	1	0	1	0	0	1	0	0	1	0	0	1	0.0388889	0	0	1	0
22151	5	1	110	24445	657.5	1	0	0	0	0	8100	1	8.1	0	0	0	1.062	7	3.8	74	0	2	1	3	0	0	0	0	0	1	1	0	0	0	0	0	0	0	0	1	0.0388889	0	0	1	0
21920	5	1	111	24416	392.79	0	0	1	0	0	4555	1	4.555	0	0	0	0.215	5	2.4	40	0	1	1	2	0	0	0	0	1	0	1	0	0	0	0	0	0	0	0	0	0.378965	0	1	1	0
21921	5	1	111	24416	392.79	0	0	1	0	0	10650	1	10.65	0	0	0	0.52	5	2.6	37	1	1	1	2	0	0	0	0	0	1	1	0	0	0	0	0	0	0	0	1	0.378965	0	1	1	0
21922	5	1	111	24416	392.79	0	0	1	0	0	2200	1	2.2	0	0	0	0.185	5	2.8	58	0	1	1	3	0	0	0	0	1	0	1	0	0	0	0	0	0	0	0	0	0.378965	0	1	1	0
21923	5	1	111	24416	392.79	0	0	1	0	0	13225	1	13.225	0	0	0	0.45	12	5.7	55	0	1	1	2	1	0	0	0	1	0	1	0	0	0	0	0	0	0	0	1	0.378965	0	1	1	0
21924	5	1	111	24416	392.79	0	1	0	0	0	5790	1	5.79	0	0	0	0.157	9	4.4	40	0	1	1	2		0	0	0	1	0	1	0	0	0	0	0	0	0	0	0	0.378965	0	1	1	0
21925	5	1	111	24416	392.79	0	0	1	0	0	13340	1	13.34	0	0	0	0.516	5	2.8	73	0	1	1	2	0	0	0	0	1	0	1	0	0	0	0	0	0	0	0	1	0.378965	0	1	1	0
21926	5	1	111	24416	392.79	0	0	1	0	0	2070	1	2.07	0	0	0	0.125	3	2	60	0	12	1	3	0	0	0	0	0	1	1	0	0	0	0	0	0	0	0	0	0.378965	0	1	1	0
21927	5	1	111	24416	70.5	0	0	1	0	0	66870	1	66.87	0	0	0	7.4	8	4.3	70	0	1	1	3	1	1	0	0	0	0	1	0	0	0	0	0	0	0	0	1	0.378965	0	1	1	0
21928	5	1	111	24417	869.5	0	0	0	0	1	2954	1	2.954	0	0	0	0.153	9	4.4	65	0	6	1	2	0	0	0	0	1	0	1	0	0	0	0	0	0	0	0	0	0.378965	0	1	1	0
21929	5	1	111	24417	18.5	0	0	0	0	1	7780	1	7.78	0	0	0	0.75	5	2.6	85	1	1	1	3	0	0	0	0	1	0	1	0	0	0	0	0	0	1	0	0	0.378965	0	1	1	0
21930	5	1	111	24417	18.5	0	0	0	0	1	39650	1	39.65	0	0	0	1.5	8	4.1	58	0	13	1	3	0	0	0	1	0	0	1	0	0	0	0	0	0	1	0	0	0.378965	0	1	1	0
21931	5	1	111	24417	18.5	0	0	0	0	1	7180	1	7.18	0	0	0	2.353	10	4.3	66	0	1	1	2	1	0	0	0	1	0	1	0	0	0	0	0	0	0	0	0	0.378965	0	1	1	0
21932	5	1	111	24417	11100	0	0	1	0	0	28325	1	28.325	0	0	0	0.909	11	5.8	65	0	2	1	2	0	0	0	0	1	0	1	0	0	1	0	0	0	0	0	1	0.378965	0	1	1	0
21933	5	1	111	24417	1387.5	0	1	0	0	0	2650	1	2.65	0	0	0	1.15	3	2	60	0	7	1	3	0	0	0	0	0	1	1	0	0	0	0	0	0	0	0	0	0.378965	0	1	1	0
21934	5	1	111	24417	971.25	0	1	0	0	0	31540	1	31.54	0	0	0	2.15	7	3.8	50	0	2	1	3	0	1	0	0	0	0	1	0	0	0	0	0	0	0	0	0	0.378965	0	1	1	0
21935	5	1	111	24417	971.25	0	1	0	0	0	24250	1	24.25	7	1	0	2.15	5	3	59	0	13	1	2	0	0	0	0	0	1	1	0	0	0	0	0	0	1	0	0	0.378965	0	1	1	0
22136	5	1	111	24443	555	0	0	0	0	1	3440	1	3.44	0	0	0	0.11	6	3.1	45	0	8	1	3	1	0	0	0	1	0	1	0	0	0	0	0	0	0	0	0	0.378965	0	1	1	0
22137	5	1	111	24443	18.5	0	0	0	0	1	3350	1	3.35	0	0	0	1.01	7	3.8	49	0	13	1	2	0	0	0	0	1	0	1	0	0	0	0	0	0	0	0	0	0.378965	0	1	1	0
22138	5	1	111	24443	18.5	0	0	0	0	1	35150	1	35.15	0	0	0	1.77	5	2.2	30	1	7	1	3	0	1	0	0	0	0	1	0	0	0	0	0	0	0	0	0	0.378965	0	1	1	0
22139	5	1	111	24443	10989	0	1	0	0	0	7550	1	7.55	8	1	0	0.325	5	2.8	47	0	10	1	3	0	0	0	0	1	0	1	0	0	0	0	0	0	0	0	0	0.378965	0	1	1	0
22140	5	1	111	24443	407	0	1	0	0	0	28300	1	28.3	0	0	0	1.775	6	3.5	45	1	1	1	3	0	1	0	0	0	0	1	0	0	0	0	0	0	0	0	0	0.378965	0	1	1	0
22141	5	1	111	24443	407	0	1	0	0	0	2400	1	2.4	10	1	0	1.15	6	2.7	40	0	13	1	3	0	0	0	0	1	0	1	0	0	0	0	0	0	0	0	0	0.378965	0	1	1	0
22142	5	1	111	24443	407	0	1	0	0	0	13900	1	13.9	0	0	0	2.25	4	2.5	48	0	8	1	3	0	0	0	0	1	0	0	0	0	0	0	0	0	0	0	1	0.378965	0	1	1	0
22143	5	1	111	24443	407	0	1	0	0	0	48650	1	48.65	8	1	0	3.525	6	2.9	60	0	1	1	3	0	1	0	0	0	0	1	0	0	0	0	0	0	0	0	0	0.378965	0	1	1	0
22176	5	1	111	24449	2996.25	0	0	0	0	1	3855	1	3.855	0	0	0	0.158	2	1.5	48	0	5	1	1	0	1	0	0	0	0	1	0	0	0	0	0	0	0	0	0	0.378965	0	1	1	0
22177	5	1	111	24449	2996.25	0	0	1	0	0	5260	1	5.26	0	0	0	0.375	5	2.8	50	0	1	1	1	0	1	0	0	0	0	1	0	0	0	0	0	0	0	0	1	0.378965	0	1	1	0
22178	5	1	111	24449	155.1	0	1	0	0	0	8530	1	8.53	0	0	0	0.5	5	3	45	0	7	1	2	1	1	0	0	0	0	1	0	0	0	0	0	0	0	0	1	0.378965	0	1	1	0
22179	5	1	111	24449	155.1	0	0	0	0	1	17120	1	17.12	0	0	0	1.158	8	4.3	90	0	1	1	1	1	0	0	0	1	0	1	0	0	0	0	0	0	0	0	0	0.378965	0	1	1	0
22180	5	1	111	24449	155.1	0	0	1	0	0	15950	1	15.95	0	0	0	1.05	8	4.1	50	0	6	1	1	1	0	0	0	1	0	1	0	0	0	0	0	0	0	0	0	0.378965	0	1	1	0
22181	5	1	111	24449	155.1	0	1	0	0	0	18700	1	18.7	0	0	0	1.1	8	4.3	50	0	1	1	2	0	0	0	0	1	0	1	0	0	0	0	0	0	0	0	0	0.378965	0	1	1	0
22182	5	1	111	24449	155.1	0	0	1	0	0	15230	1	15.23	0	0	0	1.05	5	2.6	50	1	1	1	1	0	0	0	0	1	0	1	0	0	0	0	0	0	0	0	0	0.378965	0	1	1	0
22183	5	1	111	24449	70.5	0	0	0	0	1	6640	1	6.64	0	0	0	0.26	6	3.5	50	0	1	1	1	0	0	0	0	1	0	1	0	0	0	0	0	0	0	0	0	0.378965	0	1	1	0
21936	5	1	112	24418	1076.56	0	0	0	0	1	6540	1	6.54	0	0	0	0.227	5	2.6	40	0	8	1	3	0	0	0	0	1	0	1	0	0	0	0	0	0	0	0	0	0.357664	1	0	0	0
21937	5	1	112	24418	1076.56	0	1	0	0	0	5280	1	5.28	0	0	0	0.202	4	2.1	40	0	1	1	3	1	0	0	0	1	0	1	0	0	0	0	0	0	0	0	0	0.357664	1	0	0	0
21938	5	1	112	24418	1076.56	0	0	0	0	1	8630	1	8.63	6	1	0	0.556	6	3.5	50	0	8	1	3	0	0	0	0	1	0	1	0	0	0	0	0	0	0	0	0	0.357664	1	0	0	0
21939	5	1	112	24418	1076.56	0	1	0	0	0	12610	1	12.61	0	0	0	0.328	5	2.6	46	0	8	1	1	0	1	0	0	0	0	1	0	0	0	0	0	0	0	0	0	0.357664	1	0	0	0
21940	5	1	112	24418	1076.56	0	1	0	0	0	4890	1	4.89	0	0	0	0.188	9	4	48	0	1	1	1	1	0	0	0	1	0	1	0	0	0	0	0	0	0	0	0	0.357664	1	0	0	0
21941	5	1	112	24418	1076.56	0	1	0	0	0	10290	1	10.29	0	0	0	0.378	6	3.5	70	1	1	1	1	0	0	0	0	0	1	1	0	0	0	0	0	0	0	0	0	0.357664	1	0	0	0
21942	5	1	112	24418	1076.56	0	1	0	0	0	5960	1	5.96	0	0	0	0.303	5	2.8	45	0	7	1	3	0	0	0	0	1	0	1	0	0	0	0	0	0	0	0	0	0.357664	1	0	0	0
21943	5	1	112	24418	1076.56	0	1	0	0	0	4270	1	4.27	0	0	0	0.151	7	3.6	80	0	1	1	2	1	0	0	0	1	0	1	0	0	0	0	0	0	0	0	0	0.357664	1	0	0	0
22152	5	1	112	24446	3246.25	0	0	0	0	1	31036	1	31.036	10	1	0	0.959	7	3.8	55	0	7	1	3	0	0	0	0	1	0	1	0	0	0	0	0	0	0	0	1	0.357664	1	0	0	0
22153	5	1	112	24446	3246.25	0	0	0	0	1	7465	1	7.465	0	0	0	0.252	5	3	49	0	6	1	2	1	0	0	0	1	0	1	0	0	0	0	0	0	0	0	0	0.357664	1	0	0	0
22154	5	1	112	24446	371	0	0	0	0	1	23575	1	23.575	0	0	0	0.757	6	3.1	75	0	2	1	2	0	0	0	0	1	0	1	0	0	0	0	0	0	0	0	1	0.357664	1	0	0	0
22155	5	1	112	24446	371	0	0	0	0	1	26520	1	26.52	0	0	0	1.111	3	1.8	35	0	8	1	2		0	0	0	1	0	1	0	0	0	0	0	0	0	0	1	0.357664	1	0	0	0
22156	5	1	112	24446	371	0	0	0	0	1	29100	1	29.1	0	0	0	1.25	1	1	50	0	7	1	2	0	1	0	0	0	0	1	0	0	0	0	0	0	0	0	0	0.357664	1	0	0	0
22157	5	1	112	24446	371	0	0	0	0	1	42510	1	42.51	0	0	0	1.414	4	2.5	49	0	7	1	3	0	0	0	0	1	0	1	0	0	0	0	0	0	0	0	1	0.357664	1	0	0	0
22158	5	1	112	24446	371	0	0	0	0	1	8280	1	8.28	0	0	0	1.6	3	2	55	1	5	1	2	1	0	0	0	1	0	1	0	0	0	0	0	0	0	0	0	0.357664	1	0	0	0
22159	5	1	112	24446	132.5	0	0	0	0	1	25390	1	25.39	0	0	0	3.055	3	2	52	0	7	1	3	0	0	0	1	0	0	1	0	0	0	0	0	0	0	0	0	0.357664	1	0	0	0
22160	5	1	112	24447	718.88	0	1	0	0	0	18300	1	18.3	0	0	0	0.606	5	2.8	48	0	8	1	3	0	0	0	1	0	0	1	0	0	0	0	0	0	0	0	0	0.357664	1	0	0	0
22161	5	1	112	24447	718.88	0	1	0	0	0	7000	1	7	0	0	0	0.177	4	2.5	45	0	6	1	1		0	0	0	1	0	1	0	0	0	0	0	0	0	0	0	0.357664	1	0	0	0
22162	5	1	112	24447	718.88	0	0	0	0	1	11030	1	11.03	0	0	0	0.202	2	1.5	32	0	5	1	2	1	0	0	1	0	0	1	0	0	0	0	0	0	0	0	0	0.357664	1	0	0	0
22163	5	1	112	24447	718.88	0	1	0	0	0	11750	1	11.75	0	0	0	0.657	4	2.1	35	0	5	1	2	0	0	0	1	0	0	1	0	0	0	0	0	0	0	0	0	0.357664	1	0	0	0
22164	5	1	112	24447	5457.38	0	0	0	0	1	9875	1	9.875	0	0	0	0.272	3	2	45	0	5	1	1	1	0	0	0	1	0	1	0	0	0	0	0	0	0	0	0	0.357664	1	0	0	0
22165	5	1	112	24447	5457.38	0	0	0	0	1	6270	1	6.27	0	0	0	0.227	5	2.4	42	0	5	1	1	1	0	0	0	1	0	1	0	0	0	0	0	0	0	0	0	0.357664	1	0	0	0
22166	5	1	112	24447	5457.38	0	0	0	0	1	14020	1	14.02	0	0	0	0.378	4	2.1	34	0	5	1	1	1	1	0	0	0	0	1	0	0	0	0	0	0	0	0	0	0.357664	1	0	0	0
22167	5	1	112	24447	5457.38	0	0	0	0	1	6640	1	6.64	0	0	0	0.202	5	2.8	36	0	7	1	1	1	0	0	1	0	0	1	0	0	0	0	0	0	0	0	0	0.357664	1	0	0	0
22168	5	1	112	24448	585	0	0	0	0	1	3370	1	3.37	10	1	0	0.212	4	2.1	30	0	12	1	3	0	0	0	0	1	0	1	0	0	0	0	0	0	0	0	0	0.357664	1	0	0	0
22169	5	1	112	24448	19.5	0	1	0	0	0	13870	1	13.87	0	0	0	1.05	4	2.1	45	1	6	1	3	0	0	0	0	1	0	1	0	0	0	0	0	0	0	0	0	0.357664	1	0	0	0
22170	5	1	112	24448	19.5	0	1	0	0	0	18040	1	18.04	0	0	0	1.02	6	2.7	30	0	12	1	3	0	0	0	0	1	0	1	0	0	0	0	0	0	0	0	0	0.357664	1	0	0	0
22171	5	1	112	24448	19.5	0	1	0	0	0	8015	1	8.015	0	0	0	1.02	4	1.9	26	1	10	1	3	0	0	0	0	0	1	1	0	0	0	0	0	0	0	0	0	0.357664	1	0	0	0
22172	5	1	112	24448	19.5	0	1	0	0	0	10930	1	10.93	0	0	0	2.115	4	2.1	40	0	13	1	3	0	0	0	0	1	0	1	0	0	0	0	0	0	0	0	1	0.357664	1	0	0	0
22173	5	1	112	24448	19.5	0	1	0	0	0	24390	1	24.39	0	0	0	2.027	5	2.4	40	0	8	1	3	0	0	0	0	1	0	1	0	0	0	0	0	0	0	0	0	0.357664	1	0	0	0
22174	5	1	112	24448	19032	0	0	1	0	0	incomplete data	0				0	0.245	3	2	42	0	6	1	3	0	0	0	0	1	0	1	0	0	0	0	0	0	0	0	0	0.357664	0	1	0	1
22175	5	1	112	24448	312	0	0	0	0	1	14865	1	14.865	0	0	0	0.788	4	2.1	46	0	8	1	3	0	0	0	0	1	0	1	0	0	0	0	0	0	0	0	0	0.357664	1	0	0	0
22200	5	1	112	24452	741	0	0	0	0	1	24900	1	24.9	0	0	0	0.976	2	1.5	65	0	5	1	2	0	1	0	0	0	0	1	1	0	0	0	0	0	0	0	1	0.357664	1	0	0	0
22201	5	1	112	24452	429	0	0	0	0	1	40080	1	40.08	0	0	0	1.1	2	1.5	80	0	6	1	3	0	0	0	0	0	1	1	0	0	0	0	0	0	0	0	1	0.357664	1	0	0	0
22202	5	1	112	24452	29.25	0	0	0	0	1	65475	1	65.475	5	1	0	2.56	5	2.8	62	0	8	1	3	0	1	0	0	0	0	1	1	0	0	0	0	0	0	0	1	0.357664	1	0	0	0
22203	5	1	112	24452	29.25	0	0	0	0	1	50340	1	50.34	10	1	0	2.05	4	2.5	49	0	13	1	3	0	0	0	0	1	0	1	0	0	0	0	0	0	0	0	0	0.357664	1	0	0	0
22204	5	1	112	24452	19285.5	0	0	0	0	1	18140	1	18.14	10	1	0	0.525	8	4.3	49	0	6	1	3	1	1	0	0	0	0	1	0	0	0	0	0	0	0	0	1	0.357664	1	0	0	0
22205	5	1	112	24452	5830.5	0	0	0	0	1	43050	1	43.05	0	0	0	1.425	6	2.9	42	0	6	1	3	0	1	0	0	0	0	1	0	0	0	0	0	0	0	0	1	0.357664	1	0	0	0
22206	5	1	112	24452	448.5	0	0	0	0	1	60080	1	60.08	8	1	0	2.15	6	3.1	70	0	7	1	3	0	1	0	0	0	0	1	0	0	0	0	0	0	0	0	1	0.357664	1	0	0	0
22207	5	1	112	24452	448.5	0	0	0	0	1	49625	1	49.625	0	0	0	5.499	8	3.9	60	0	8	1	3	0	1	0	0	0	0	1	1	0	0	0	0	0	0	0	1	0.357664	1	0	0	0
22216	5	1	112	24454	708.75	0	0	0	0	1	23210	1	23.21	0	0	0	0.911	6	3.5	64	0	12	1	3	1	1	0	0	0	0	1	0	0	0	0	0	0	0	0	0	0.357664	1	0	0	0
22217	5	1	112	24454	708.75	0	0	0	0	1	14565	1	14.565	0	0	0	0.5	7	3.2	75	1	1	1	2	0	0	0	0	1	0	1	0	0	0	0	0	0	0	0	0	0.357664	1	0	0	0
22218	5	1	112	24454	40.5	0	0	0	0	1	19765	1	19.765	0	0	0	0.67	4	2.1	60	1	1	1	3	0	0	0	0	0	1	1	0	0	0	0	0	1	0	0	0	0.357664	1	0	0	0
22219	5	1	112	24454	40.5	0	0	0	0	1	30870	1	30.87	0	0	0	2.465	8	4.5	60	0	12	1	3	0	0	0	0	0	1	1	0	0	0	0	0	0	0	0	0	0.357664	1	0	0	0
22220	5	1	112	24454	4100.63	0	0	0	0	1	13800	1	13.8	0	0	0	0.71	10	4.9	58	0	5	1	2	1	0	0	0	1	0	1	0	0	0	0	0	0	0	0	0	0.357664	1	0	0	0
22221	5	1	112	24454	4100.63	0	0	0	0	1	27420	1	27.42	0	0	0	0.607	5	3	45	0	6	1	3	1	0	0	0	1	0	1	0	0	0	0	0	0	0	0	0	0.357664	1	0	0	0
22222	5	1	112	24454	4100.63	0	0	0	0	1	-910	1	-0.91	0	0	0	0.175	4	2.1	30	0	10	1	3	0	0	0	0	1	0	1	0	0	0	0	0	0	0	0	0	0.357664	1	0	0	0
22223	5	1	112	24454	4100.63	0	0	0	0	1	4770	1	4.77	0	0	0	0.25	5	2.8	45	0	5	1	1	1	0	0	0	1	0	1	0	0	0	0	0	0	0	0	0	0.357664	1	0	0	0
21960	5	1	113	24421	33.5	1	0	0	0	0	incomplete data	0				0	0.004	4	2.1	35	0	5	1	3	0	0	0	1	0	0	1	1	0	0	0	0	0	0	0	1	0.228392	0	1	0	1
21961	5	1	113	24421	1490.75	0	0	0	0	1	15460	1	15.46	0	0	0	0.215	4	2.1	34	0	10	1	3		0	0	0	1	0	1	0	0	0	0	0	0	0	0	1	0.228392	1	0	1	0
21962	5	1	113	24421	1490.75	0	0	0	0	1	incomplete data	0				1	0.909	4	2.3	37	1	1	1	3	0	0	1	0	0	0	1	0	0	0	0	0	0	0	0	1	0.228392	0	1	0	1
21963	5	1	113	24421	33.5	0	0	0	0	1	186541	1	186.541	8	1	0	2.676	5	2.6	38	0	6	1	3	0	1	0	0	0	0	1	0	0	0	0	0	0	0	0	1	0.228392	1	0	1	0
21964	5	1	113	24421	3417	1	0	0	0	0	14160	1	14.16	0	0	0	0.222	4	2.5	52	1	1	1	3	0	1	0	0	0	0	1	0	0	0	0	0	0	0	0	1	0.228392	1	0	1	0
21965	5	1	113	24421	3417	1	0	0	0	0	6720	1	6.72	0	0	0	0.078	4	2.5	55	0	7	1	3	0	0	0	0	0	1	1	0	0	0	0	0	0	0	0	0	0.228392	1	0	1	0
21966	5	1	113	24421	3417	0	0	0	0	1	incomplete data	0				0	0.442	2	1.5	45	0	7	1	3	0	0	0	0	1	0	1	0	0	0	0	0	0	0	0	0	0.228392	0	1	0	1
21967	5	1	113	24421	3417	1	0	0	0	0	31390	1	31.39	12	1	0	0.489	8	4.1	70	0	7	1	3	0	0	0	0	1	0	1	0	0	0	0	0	0	0	0	1	0.228392	1	0	1	0
21968	5	1	113	24422	2838	0	0	0	0	1	7365	1	7.365	0	0	0	0.45	3	2	50	0	1	1	3	0	0	0	0	1	0	1	0	0	0	0	0	1	0	0	0	0.228392	1	0	1	0
21969	5	1	113	24422	2838	0	0	0	0	1	6000	1	6	0	0	0	0.25	4	1.9	28	1	5	1	3	0	0	0	0	0	1	1	0	0	0	0	0	0	0	0	0	0.228392	1	0	1	0
21970	5	1	113	24422	86	0	0	0	0	1	5460	1	5.46	0	0	0	0.5	3	2	70	0	2	1	2	0	0	0	0	1	0	1	0	0	0	0	0	0	1	0	0	0.228392	1	0	1	0
21971	5	1	113	24422	86	0	0	0	0	1	15245	1	15.245	0	0	0	1.885	2	1.5	50	0	5	1	3	1	1	0	0	0	0	1	0	0	0	0	0	0	0	0	0	0.228392	1	0	1	0
21972	5	1	113	24422	86	0	0	0	0	1	2310	1	2.31	0	0	0	1.22	4	2.5	59	0	5	1	2	1	0	0	0	1	0	1	0	0	0	0	0	0	0	0	0	0.228392	1	0	1	0
21973	5	1	113	24422	86	0	0	0	0	1	26930	1	26.93	0	0	0	1.15	8	4.1	60	0	1	1	3	1	0	0	0	1	0	1	0	0	0	0	0	0	1	0	0	0.228392	1	0	1	0
21974	5	1	113	24422	86	0	0	0	0	1	9060	1	9.06	0	0	0	0.26	3	2	45	0	7	1	3	1	0	0	0	1	0	1	0	0	0	0	0	0	0	0	0	0.228392	1	0	1	0
21975	5	1	113	24422	86	0	0	0	0	1	5920	1	5.92	0	0	0	2.02	2	1.5	82	0	1	1	3	0	1	0	0	0	0	1	0	0	0	0	0	0	1	0	0	0.228392	1	0	1	0
21984	5	1	113	24424	3906.5	0	0	0	0	1	16020	1	16.02	8	1	0	0.354	3	2	50	0	7	1	3	0	1	0	0	0	0	1	0	0	0	0	0	1	0	0	1	0.228392	1	0	1	0
21985	5	1	113	24424	3906.5	0	0	0	0	1	24650	1	24.65	10	1	1	0.66	6	3.3	48	0	7	1	2	0	1	0	0	0	0	1	0	0	0	0	0	0	0	0	1	0.228392	1	0	1	0
21986	5	1	113	24424	601	0	0	0	0	1	46060	1	46.06	5	1	0	1.215	5	2.8	50	0	6	1	3	0	1	0	0	0	0	1	0	0	0	0	0	0	0	0	1	0.228392	1	0	1	0
21987	5	1	113	24424	601	0	0	0	0	1	61905	1	61.905	8	1	0	1.8	7	3.6	55	0	6	1	3	0	1	0	0	0	0	1	0	0	0	0	0	0	0	0	1	0.228392	1	0	1	0
21988	5	1	113	24424	601	0	0	0	0	1	46235	1	46.235	12	1	0	1.008	4	2.1	37	0	7	1	3	0	1	0	0	0	0	1	0	0	0	0	0	0	0	0	1	0.228392	1	0	1	0
21989	5	1	113	24424	300.5	0	0	0	0	1	127360	1	127.36	10	1	0	2.699	12	5.7	70	1	1	1	3	0	1	0	0	0	0	1	0	0	0	0	0	0	0	0	1	0.228392	1	0	1	0
21990	5	1	113	24424	300.5	0	0	0	0	1	162500	1	162.5	20	1	0	3.533	6	3.5	49	0	8	1	3	0	1	0	0	0	0	1	0	0	0	0	0	0	0	0	1	0.228392	1	0	1	0
21991	5	1	113	24424	300.5	0	0	0	0	1	97360	1	97.36	11	1	0	2.1	11	5	60	0	7	1	3	0	1	0	0	0	0	1	1	0	0	0	0	0	0	0	1	0.228392	1	0	1	0
22184	5	1	113	24450	67	1	0	0	0	0	incomplete data	0				1	0.003	4	2.1	32	0	1	1	3	0	0	0	0	1	0	1	0	0	0	0	0	0	0	0	0	0.228392	0	1	0	1
22185	5	1	113	24450	2010	1	0	0	0	0	21520	1	21.52	10	1	0	0.83	6	3.1	65	0	1	1	3	0	0	0	0	1	0	1	0	0	0	0	0	0	0	0	0	0.228392	1	0	1	0
22186	5	1	113	24450	134	0	0	0	0	1	49403	1	49.403	0	0	0	1.213	1	1	62	1	6	1	3	0	1	0	0	0	0	1	0	0	0	0	0	0	0	0	0	0.228392	1	0	1	0
22187	5	1	113	24450	134	1	0	0	0	0	20645	1	20.645	10	1	0	2.26	2	1.5	56	0	7	1	3	0	0	0	0	0	1	1	0	0	0	0	0	0	0	0	0	0.228392	1	0	1	0
22188	5	1	113	24450	402	1	0	0	0	0	incomplete data	0				1	0.003	3	2	82	0	1	1	1	0	0	0	0	1	0	1	0	0	0	0	0	0	0	0	0	0.228392	0	1	0	1
22189	5	1	113	24450	12060	0	0	0	0	1	11715	1	11.715	0	0	0	0.363	5	2.8	38	0	7	1	3	0	0	0	0	1	0	1	0	0	0	0	0	0	0	0	0	0.228392	1	0	1	0
22190	5	1	113	24450	603	0	0	0	0	1	53538	1	53.538	0	0	0	1.3	5	3	52	0	6	1	3	0	1	0	0	0	0	1	0	0	0	0	0	0	0	0	0	0.228392	1	0	1	0
22191	5	1	113	24450	603	0	0	0	0	1	87630	1	87.63	6	1	0	2.75	6	3.5	88	0	8	1	3	0	1	0	0	0	0	1	0	0	0	0	0	0	0	0	0	0.228392	1	0	1	0
22192	5	1	113	24451	1727.88	1	0	0	0	0	13915	1	13.915	0	0	0	0.212	7	3.8	47	0	1	1	3	0	0	0	0	1	0	1	0	0	0	0	0	0	0	0	1	0.228392	1	0	1	0
22193	5	1	113	24451	1727.88	1	0	0	0	0	8205	1	8.205	0	0	0	0.186	6	3.5	41	0	5	1	3	0	0	0	1	0	0	1	0	0	0	0	0	0	0	0	0	0.228392	1	0	1	0
22194	5	1	113	24451	1727.88	1	0	0	0	0	57675	1	57.675	0	0	0	0.934	6	3.1	50	0	8	1	3	0	0	0	0	0	1	1	0	0	0	0	0	0	0	0	1	0.228392	1	0	1	0
22195	5	1	113	24451	1727.88	0	0	0	0	1	19036	1	19.036	0	0	0	0.323	4	2.3	44	0	8	1	3	0	0	0	0	1	0	1	0	0	0	0	0	0	0	0	1	0.228392	1	0	1	0
22196	5	1	113	24451	1727.88	0	0	0	0	1	25953	1	25.953	0	0	0	0.564	9	4.6	59	0	7	1	3	0	0	0	0	1	0	1	0	0	0	0	0	0	0	0	1	0.228392	1	0	1	0
22197	5	1	113	24451	1727.88	1	0	0	0	0	8832	1	8.832	0	0	0	0.4	8	3.9	52	0	7	1	3	0	0	0	0	1	0	1	0	0	0	0	0	0	0	0	1	0.228392	1	0	1	0
22198	5	1	113	24451	1727.88	1	0	0	0	0	26220	1	26.22	0	0	0	0.403	4	2.5	65	0	1	1	3	0	0	0	1	0	0	1	0	0	0	0	0	0	0	0	1	0.228392	1	0	1	0
22199	5	1	113	24451	1727.88	1	0	0	0	0	850	1	0.85	0	0	0	0.181	10	4.9	52	1	5	1	3	0	0	0	0	0	1	0	0	0	0	0	0	1	0	0	1	0.228392	1	0	1	0
22224	5	1	113	24455	2551.34	0	0	0	0	1	11510	1	11.51	0	0	0	0.227	3	1.8	38	0	7	1	3	0	0	0	0	1	0	1	0	0	0	0	0	0	0	0	0	0.228392	1	0	1	0
22225	5	1	113	24455	2551.34	0	0	0	1	0	8180	1	8.18	0	0	0	0.151	6	3.1	72	0	1	1	3	0	0	0	0	1	0	1	0	0	0	0	0	0	0	0	0	0.228392	1	0	1	0
22226	5	1	113	24455	2551.34	0	0	0	1	0	incomplete data	0				1	0.037	6	3.3	60	0	7	1	3	0	0	0	0	1	0	1	0	0	0	0	0	0	0	0	0	0.228392	0	1	0	1
22227	5	1	113	24455	86	0	0	0	0	1	88625	1	88.625	24	1	0	1.257	5	2.6	70	0	6	1	3	0	1	0	0	0	0	1	0	0	0	0	0	0	0	0	1	0.228392	1	0	1	0
22228	5	1	113	24455	5676	0	0	0	0	1	400140	1	400.14	12	1	0	2.853	3	1.8	40	0	12	1	3	0	1	0	0	0	0	1	0	0	0	0	0	0	0	0	1	0.228392	1	0	1	0
22229	5	1	113	24455	5676	1	0	0	0	0	136390	1	136.39	12	1	0	1.262	4	2.5	42	0	8	1	3	0	1	0	0	0	0	1	0	0	0	0	0	0	0	0	1	0.228392	1	0	1	0
22230	5	1	113	24455	5676	0	0	0	0	1	13320	1	13.32	0	0	0	0.227	6	3.3	75	0	1	1	2	0	1	0	0	0	0	1	0	0	0	0	0	0	0	0	1	0.228392	1	0	1	0
22231	5	1	113	24455	5676	0	0	0	0	1	incomplete data	0				1	0.025	4	2.5	45	0	7	1	3	0	0	0	0	1	0	1	0	0	0	0	0	0	0	0	1	0.228392	0	1	0	1
21952	5	1	114	24420	4741.5	0	0	0	0	1	25250	1	25.25	0	0	0	0.657	5	3	49	0	8	1	3	0	1	0	0	0	0	1	0	0	0	0	0	0	0	0	1	0.299688	1	0	1	0
21953	5	1	114	24420	163.5	0	0	0	0	1	47610	1	47.61	0	0	0	1.13	3	2	55	0	1	1	3	0	1	0	0	0	0	1	0	0	0	0	0	0	0	0	0	0.299688	1	0	1	0
21954	5	1	114	24420	2289	0	0	0	0	1	2070	1	2.07	5	1	0	0.505	4	2.5	48	0	8	1	3	0	1	0	0	0	0	1	0	0	0	0	0	0	0	0	0	0.299688	1	0	1	0
21955	5	1	114	24420	545	0	0	0	0	1	52620	1	52.62	6	1	0	1.85	2	1.5	58	0	1	1	3	0	1	0	0	0	0	1	0	0	0	0	0	0	0	0	0	0.299688	1	0	1	0
21956	5	1	114	24420	218	0	0	0	0	1	39720	1	39.72	4	1	0	2.4	8	4.3	58	0	7	1	3	0	1	0	0	0	0	1	1	0	0	0	0	0	0	0	0	0.299688	1	0	1	0
21957	5	1	114	24420	218	0	0	0	0	1	46000	1	46	12	1	0	2.4	5	3	55	0	1	1	1	0	1	0	0	0	0	1	0	0	0	0	0	0	0	0	1	0.299688	1	0	1	0
21958	5	1	114	24420	218	0	0	0	0	1	52980	1	52.98	3	1	0	2.3	6	3.3	70	0	1	1	2	0	1	0	0	0	0	1	1	0	0	0	0	0	0	0	0	0.299688	1	0	1	0
21959	5	1	114	24420	218	0	0	0	0	1	55100	1	55.1	0	0	0	2.15	7	3.6	60	0	1	1	3	0	1	0	0	0	0	1	1	0	0	0	0	0	0	0	1	0.299688	1	0	1	0
21992	5	1	114	24425	510	0	0	0	1	0	7152	1	7.152	0	0	0	0.455	5	3	52	0	6	1	3	1	0	0	1	0	0	1	1	0	0	0	0	0	0	0	0	0.299688	1	0	1	0
21993	5	1	114	24425	510	0	0	0	1	0	17520	1	17.52	0	0	0	0.696	6	2.9	36	0	7	1	3	0	0	0	1	0	0	1	0	0	0	0	0	0	0	0	0	0.299688	1	0	1	0
21994	5	1	114	24425	850	0	0	0	0	1	57350	1	57.35	0	0	0	2.214	5	2.8	45	0	7	1	3	0	0	0	0	1	0	1	0	0	0	0	0	0	0	0	0	0.299688	1	0	1	0
21995	5	1	114	24425	850	0	0	0	0	1	68950	1	68.95	0	0	0	2.86	8	3.7	40	0	7	1	3	0	1	0	0	0	0	1	0	0	0	0	0	0	0	0	0	0.299688	1	0	1	0
21996	5	1	114	24425	850	0	0	0	0	1	17820	1	17.82	3	1	0	2.012	4	2.5	60	0	7	1	3	0	1	0	0	0	0	1	0	0	0	0	0	0	0	0	0	0.299688	1	0	1	0
21997	5	1	114	24425	850	0	0	0	0	1	150480	1	150.48	0	0	0	5.079	7	3.6	73	0	8	1	3	0	1	0	0	0	0	1	0	0	0	0	0	0	1	0	0	0.299688	1	0	1	0
21998	5	1	114	24425	850	0	0	0	0	1	incomplete data	0				0	2.226	3	2	46	1	7	1	3	0	0	0	0	0	1	1	0	0	0	0	0	0	1	0	0	0.299688	0	1	0	1
21999	5	1	114	24425	850	1	0	0	0	0	107740	1	107.74	0	0	0	2.075	4	2.5	52	0	6	1	3	0	1	0	0	0	0	1	0	0	0	0	0	0	0	0	0	0.299688	1	0	1	0
22024	5	1	114	24429	812	0	0	0	1	0	28260	1	28.26	0	0	0	0.9	2	1.5	32	0	7	1	2	0	1	0	0	0	0	1	1	0	0	0	0	0	1	0	1	0.299688	1	0	1	0
22025	5	1	114	24429	116	0	0	0	0	1	97615	1	97.615	0	0	0	1.1	8	4.3	71	0	8	1	3	0	1	0	0	0	0	1	1	0	0	0	0	0	1	0	1	0.299688	1	0	1	0
22026	5	1	114	24429	29	0	0	0	0	1	73910	1	73.91	0	0	0	2.06	6	3.5	68	0	1	1	3	0	1	0	0	0	0	1	0	0	0	0	0	0	1	0	1	0.299688	1	0	1	0
22027	5	1	114	24429	29	0	0	0	0	1	32480	1	32.48	0	0	0	1.465	7	4	51	0	8	1	3	0	0	0	0	1	0	1	1	0	0	0	0	0	0	0	1	0.299688	1	0	1	0
22028	5	1	114	24429	29	0	0	0	0	1	58358	1	58.358	0	0	0	2.32	13	6	68	0	5	1	3	0	1	0	0	0	0	1	0	0	0	0	0	0	1	0	1	0.299688	1	0	1	0
22029	5	1	114	24429	29	0	0	0	0	1	81415	1	81.415	10	1	0	2.108	10	4.9	75	0	10	1	3	0	0	0	0	1	0	1	1	0	0	0	0	1	1	0	1	0.299688	1	0	1	0
22030	5	1	114	24429	9541	0	0	0	0	1	19225	1	19.225	0	0	0	0.5	2	1.5	68	1	5	1	3	0	1	0	0	0	0	1	1	0	0	0	0	0	1	0	1	0.299688	1	0	1	0
22031	5	1	114	24429	406	0	0	0	0	1	39256	1	39.256	0	0	0	1.95	5	3	54	0	6	1	3	0	0	0	0	1	0	1	1	0	0	0	0	0	1	0	1	0.299688	1	0	1	0
22208	5	1	114	24453	5395.5	1	0	0	0	0	6850	1	6.85	0	0	0	0.364	3	2	76	0	1	1	3	1	0	0	0	1	0	1	0	0	0	0	0	0	0	0	0	0.299688	1	0	1	0
22209	5	1	114	24453	163.5	0	0	0	0	1	5550	1	5.55	0	0	0	1.1	1	1	78	1	1	1	3	0	0	0	0	0	1	1	0	0	0	0	0	0	0	0	0	0.299688	1	0	1	0
22210	5	1	114	24453	109	0	0	0	0	1	24660	1	24.66	0	0	0	2.025	4	2.3	45	0	1	1	3	1	1	0	0	0	0	1	0	0	0	0	0	0	0	0	1	0.299688	1	0	1	0
22211	5	1	114	24453	109	0	0	0	0	1	15215	1	15.215	0	0	0	2.07	3	2	51	0	7	1	3	0	0	0	0	1	0	1	1	0	0	0	0	0	1	0	1	0.299688	1	0	1	0
22212	5	1	114	24453	12753	0	0	0	1	0	2812	1	2.812	0	0	0	0.362	4	2.5	42	0	1	1	3	0	0	0	0	1	0	1	1	0	0	0	0	0	1	0	0	0.299688	1	0	1	0
22213	5	1	114	24453	981	0	0	0	0	1	4240	1	4.24	0	0	0	1.06	5	2.6	36	1	8	1	3	1	0	0	0	0	1	1	1	0	0	0	0	0	1	0	0	0.299688	1	0	1	0
22214	5	1	114	24453	245.25	0	0	0	0	1	61240	1	61.24	0	0	0	4.5	3	2	67	0	8	1	3	0	0	0	0	1	0	1	1	0	0	0	0	0	1	0	1	0.299688	1	0	1	0
22215	5	1	114	24453	245.25	0	0	0	0	1	96400	1	96.4	0	0	0	2.116	2	1.5	80	0	8	1	3	0	1	0	0	0	0	1	0	0	0	0	0	0	0	0	1	0.299688	1	0	1	0
22232	5	1	114	24456	2088	0	0	0	1	0	4850	1	4.85	0	0	0	0.176	2	1.5	70	0	1	1	2	0	1	0	0	0	0	1	0	0	0	0	0	0	0	0	1	0.299688	1	0	1	0
22233	5	1	114	24456	348	0	0	0	0	1	71565	1	71.565	0	0	0	1.588	4	2.1	40	0	10	1	3	0	1	0	0	0	0	1	1	0	0	0	0	0	0	0	1	0.299688	1	0	1	0
22234	5	1	114	24456	101.5	0	0	0	0	1	159750	1	159.75	9	1	0	4.746	8	4.3	70	0	1	1	3	0	1	0	0	0	0	1	0	0	0	0	0	0	0	0	1	0.299688	1	0	1	0
22235	5	1	114	24456	101.5	0	0	0	0	1	237488	1	237.488	5	1	0	4.04	4	2.3	67	0	8	1	3	0	1	0	0	0	0	1	0	0	0	0	0	0	0	0	1	0.299688	1	0	1	0
22236	5	1	114	24456	319	0	1	0	0	0	incomplete data	0				1	0.003	6	3.1	35	0	6	1	3	1	0	0	0	1	0	1	0	0	0	0	0	0	0	0	1	0.299688	0	1	0	1
22237	5	1	114	24456	28710	0	1	0	0	0	18390	1	18.39	0	0	0	0.429	6	3.1	42	0	7	1	3	0	0	0	0	1	0	1	0	0	0	0	0	0	0	0	1	0.299688	1	0	1	0
22238	5	1	114	24456	2233	0	0	0	0	1	46120	1	46.12	14	1	0	1.287	3	2	65	0	8	1	3	0	1	0	0	0	0	1	0	0	0	0	0	0	0	0	1	0.299688	1	0	1	0
22239	5	1	114	24456	638	0	0	0	0	1	77240	1	77.24	5	1	0	2.272	5	3	58	0	6	1	3	0	1	0	0	0	0	1	0	0	0	0	0	0	0	0	1	0.299688	1	0	1	0
22256	5	1	114	24459	5916	1	0	0	0	0	26000	1	26	8	1	0	0.83	5	2.8	65	0	1	1	3	0	1	0	0	0	0	1	0	0	0	0	0	0	0	0	1	0.299688	1	0	1	0
22257	5	1	114	24459	5916	0	0	0	0	1	incomplete data	0				1	0.02	4	2.1	38	0	13	1	3	0	0	0	0	1	0	1	0	0	0	0	0	0	0	0	1	0.299688	0	1	0	1
22258	5	1	114	24459	2754	0	0	0	0	1	33200	1	33.2	8	1	0	1.02	3	2	61	0	12	1	3	0	0	0	0	0	1	1	0	0	0	0	0	0	0	0	1	0.299688	1	0	1	0
22259	5	1	114	24459	2754	0	0	0	0	1	95000	1	95	0	0	0	1.2	4	2.1	45	0	12	1	3	0	0	0	0	1	0	1	0	0	0	0	0	0	0	0	1	0.299688	1	0	1	0
22260	5	1	114	24459	459	0	0	0	0	1	239000	1	239	8	1	0	3.025	6	3.3	52	0	8	1	3	0	1	0	0	0	0	1	0	0	0	0	0	0	0	0	1	0.299688	1	0	1	0
22261	5	1	114	24459	459	0	0	0	0	1	358450	1	358.45	8	1	0	2.85	11	5.6	76	0	1	1	3	0	1	0	0	0	0	1	0	0	0	0	0	0	0	0	1	0.299688	1	0	1	0
22262	5	1	114	24459	459	1	0	0	0	0	190050	1	190.05	8	1	0	3.22	9	4.6	65	0	1	1	3	0	1	0	0	0	0	1	0	0	0	0	0	0	0	0	1	0.299688	1	0	1	0
22263	5	1	114	24459	459	0	0	0	0	1	274550	1	274.55	4	1	0	3.2	8	4.1	70	0	1	1	3	0	1	0	0	0	0	1	0	0	0	0	0	0	0	0	1	0.299688	1	0	1	0
21976	5	1	115	24423	756.5	1	0	0	0	0	3380	1	3.38	0	0	0	0.121	9	4.4	70	0	1	1	1	1	0	0	0	1	0	0	0	0	0	0	0	0	1	0	0	0.290819	0	0	0	0
21977	5	1	115	24423	756.5	1	0	0	0	0	5530	1	5.53	0	0	0	0.212	6	3.3	42	0	8	1	1	1	0	0	0	1	0	1	0	0	0	0	0	0	0	0	0	0.290819	0	0	0	0
21978	5	1	115	24423	756.5	0	0	0	0	1	21140	1	21.14	0	0	0	0.354	4	2.5	50	0	7	1	1	1	1	0	0	0	0	1	0	0	0	0	0	0	0	0	0	0.290819	0	0	0	0
21979	5	1	115	24423	756.5	1	0	0	0	0	1025	1	1.025	0	0	0	0.085	5	2.4	60	0	1	1	1	1	0	0	0	1	0	1	0	0	0	0	0	0	0	0	0	0.290819	0	0	0	0
21980	5	1	115	24423	756.5	1	0	0	0	0	1750	1	1.75	0	0	0	0.075	8	3.3	35	0	8	1	1	1	0	0	0	1	0	1	0	0	0	0	0	0	0	0	1	0.290819	0	0	0	0
21981	5	1	115	24423	756.5	1	0	0	0	0	incomplete data	0				1	0.01	4	2.1	29	0	1	1	1	0	0	0	0	1	0	1	0	0	0	0	0	0	0	0	1	0.290819	0	1	0	1
21982	5	1	115	24423	133.5	0	0	0	0	1	4790	1	4.79	0	0	0	1.662	2	1.5	70	0	1	1	1	1	1	0	0	0	0	1	0	0	0	0	0	0	0	0	1	0.290819	0	0	0	0
21983	5	1	115	24423	133.5	0	0	0	0	1	20269	1	20.269	0	0	0	3.636	4	2.5	58	0	8	1	3	0	1	0	0	0	0	1	0	0	0	0	0	0	0	0	1	0.290819	0	0	0	0
22000	5	1	115	24426	2278.5	1	0	0	0	0	incomplete data	0				1	0.008	5	2.4	40	0	12	1	1	1	0	1	0	0	0	1	0	0	0	0	0	0	0	0	0	0.290819	0	1	0	1
22001	5	1	115	24426	24.5	0	0	0	0	1	7868	1	7.868	0	0	0	1.06	7	3.4	57	0	8	1	3	0	1	0	0	0	0	1	0	0	0	0	0	0	0	0	0	0.290819	0	0	0	0
22002	5	1	115	24426	24.5	0	0	0	1	0	38625	1	38.625	4	1	0	1.038	6	3.3	60	0	8	1	3	0	0	0	0	1	0	1	0	0	0	0	0	0	0	0	0	0.290819	0	0	0	0
22003	5	1	115	24426	24.5	0	0	0	1	0	5540	1	5.54	0	0	0	0.245	9	4.4	80	0	7	1	3	0	0	0	0	1	0	1	0	0	0	0	0	0	0	0	0	0.290819	0	0	0	0
22004	5	1	115	24426	24.5	0	0	0	0	1	46175	1	46.175	0	0	0	1.1	6	3.1	72	0	8	1	3	0	1	0	0	0	0	1	0	0	0	0	0	0	0	0	0	0.290819	0	0	0	0
22005	5	1	115	24426	24.5	0	0	0	0	1	58970	1	58.97	8	1	0	0.85	5	2.8	59	0	8	1	3	0	0	0	0	1	0	1	0	0	0	0	0	0	0	0	0	0.290819	0	0	0	0
22006	5	1	115	24426	1911	0	0	0	0	1	22310	1	22.31	0	0	0	0.6	2	1.5	55	0	12	1	3	0	1	0	0	0	0	1	0	0	0	0	0	0	0	0	0	0.290819	0	0	0	0
22007	5	1	115	24426	1911	0	0	0	0	1	14180	1	14.18	4	1	0	0.41	4	2.5	45	0	1	1	3	1	1	0	0	0	0	1	0	0	0	0	0	0	0	0	0	0.290819	0	0	0	0
22240	5	1	115	24457	3270.75	0	1	0	0	0	17090	1	17.09	0	0	0	0.43	12	5.9	58	0	1	1	1	1	1	0	0	0	0	1	0	0	0	0	0	0	0	0	0	0.290819	0	0	0	0
22241	5	1	115	24457	3270.75	0	0	0	0	1	1910	1	1.91	0	0	0	0.202	5	3	45	0	5	1	1	1	0	0	0	1	0	1	0	0	0	0	0	0	0	0	0	0.290819	0	0	0	0
22242	5	1	115	24457	233.63	0	0	0	0	1	18300	1	18.3	0	0	0	1.23	5	2.6	35	0	7	1	1	0	1	0	0	0	0	1	0	0	0	0	0	0	0	0	0	0.290819	0	0	0	0
22243	5	1	115	24457	233.63	0	0	0	0	1	18670	1	18.67	0	0	0	1.1	6	2.9	62	1	1	1	3	0	1	0	0	0	0	1	0	0	0	0	0	0	1	0	0	0.290819	0	0	0	0
22244	5	1	115	24457	233.63	0	0	0	0	1	28000	1	28	0	0	0	1.625	5	2.8	87	0	1	1	1	1	1	0	0	0	0	1	0	0	0	0	0	0	0	0	0	0.290819	0	0	0	0
22245	5	1	115	24457	233.63	0	0	0	0	1	23100	1	23.1	0	0	0	1.749	3	2	40	1	7	1	3	1	1	0	0	0	0	1	0	0	0	0	0	0	1	0	0	0.290819	0	0	0	0
22246	5	1	115	24457	133.5	0	0	0	0	1	31700	1	31.7	0	0	0	1.858	5	2.8	47	0	1	1	3	0	0	1	0	0	0	1	0	0	0	0	0	0	0	0	0	0.290819	0	0	0	0
22247	5	1	115	24457	133.5	0	0	0	0	1	67850	1	67.85	0	0	0	3.377	1	1	60	0	8	1	1	0	1	0	0	0	0	1	1	0	0	0	0	0	1	0	0	0.290819	0	0	0	0
22248	5	1	115	24458	1592.5	1	0	0	0	0	incomplete data	0				1	0.012	3	2	49	0	7	1	2	1	0	1	0	0	0	1	1	0	0	0	0	0	1	0	0	0.290819	0	1	0	1
22249	5	1	115	24458	269.5	1	0	0	0	0	88200	1	88.2	0	0	1	1.22	1	1	62	1	1	1	2	0	1	0	0	0	0	1	0	0	0	0	0	0	0	0	0	0.290819	0	0	0	0
22250	5	1	115	24458	159.25	1	0	0	0	0	166100	1	166.1	5	1	0	2.428	3	1.8	55	0	5	1	3	0	1	0	0	0	0	1	0	0	0	0	0	0	0	0	1	0.290819	0	0	0	0
22251	5	1	115	24458	159.25	1	0	0	0	0	33600	1	33.6	5	1	0	2.21	4	2.5	70	0	1	1	2	0	0	0	0	1	0	1	0	0	0	0	0	0	0	0	0	0.290819	0	0	0	0
22252	5	1	115	24458	3822	0	0	0	1	0	59650	1	59.65	0	0	0	0.9	4	2.1	35	0	7	1	3	0	1	0	0	0	0	1	0	0	0	0	0	0	0	0	1	0.290819	0	0	0	0
22253	5	1	115	24458	1323	1	0	0	0	0	19270	1	19.27	0	0	0	1.315	6	3.1	81	0	1	1	3	0	1	0	0	0	0	1	0	0	0	0	0	0	0	0	0	0.290819	0	0	0	0
22254	5	1	115	24458	404.25	1	0	0	0	0	106640	1	106.64	0	0	0	2.406	2	1.5	40	0	8	1	2	0	1	0	0	0	0	1	0	0	0	0	0	0	0	0	0	0.290819	0	0	0	0
22255	5	1	115	24458	404.25	1	0	0	0	0	incomplete data	0				0	2.262	6	3.3	60	0	6	1	3	0	0	1	0	0	0	1	0	0	0	0	0	0	0	0	0	0.290819	0	1	0	1
21825	5	1	116	24404	78.5	0	0	0	0	1	incomplete data	0				1	0	3	1.8	34	1	5	0	3	1	0	0	0	0	1	1	0	0	0	0	1	0	0	0	0	0.0483817	0	1	0	1
21826	5	1	116	24404	78.5	1	0	0	0	0	incomplete data	0				1	0	2	1.5	21	0	10	0	3		0	0	0	0	1	1	0	0	0	0	1	0	0	0	0	0.0483817	0	1	0	1
21827	5	1	116	24404	2747.5	0	0	0	0	1	6690	1	6.69	0	0	0	0.405	6	3.5	50	0	8	1	3	0	1	0	0	0	0	1	1	0	0	0	0	1	1	0	0	0.0483817	0	0	1	0
21828	5	1	116	24404	471	0	0	0	0	1	15950	1	15.95	0	0	0	0.7	8	3.7	70	1	1	1	3	0	0	0	0	0	1	1	1	0	0	0	0	1	0	0	1	0.0483817	0	0	1	0
21829	5	1	116	24404	78.5	0	0	0	0	1	26500	1	26.5	0	0	0	1.403	5	2.6	45	0	10	1	3	0	0	0	0	1	0	1	1	0	0	0	0	1	1	0	0	0.0483817	0	0	1	0
21830	5	1	116	24404	78.5	0	0	0	0	1	31050	1	31.05	0	0	0	3.113	5	2.6	71	0	7	1	3	0	1	0	0	0	0	1	1	0	0	0	0	1	0	0	1	0.0483817	0	0	1	0
21831	5	1	116	24404	43881.5	0	0	0	0	1	6890	1	6.89	0	0	0	0.202	6	3.1	60	0	1	1	3	0	0	0	0	0	1	1	0	0	0	0	0	1	0	0	1	0.0483817	0	0	1	0
21832	5	1	116	24404	5102.5	0	0	0	0	1	20690	1	20.69	0	0	0	1.113	3	2	85	0	8	1	3	0	0	0	0	0	1	1	0	0	0	0	0	0	0	0	1	0.0483817	0	0	1	0
22008	5	1	116	24427	78.5	0	1	0	0	0	29500	1	29.5	0	0	0	0.495	4	2.1	45	1	1	1	1	0	0	0	0	1	0	1	0	0	0	0	0	0	0	0	0	0.0483817	0	0	1	0
22009	5	1	116	24427	2983	0	1	0	0	0	6730	1	6.73	0	0	0	0.759	6	3.1	50	0	1	1	2	0	0	1	0	0	0	1	0	0	0	0	0	0	0	0	0	0.0483817	0	0	1	0
22010	5	1	116	24427	392.5	0	1	0	0	0	23250	1	23.25	0	0	1	1.27	8	3.7	36	0	7	1	1	1	1	0	0	0	0	1	0	0	0	0	0	0	0	0	1	0.0483817	0	0	1	0
22011	5	1	116	24427	78.5	0	1	0	0	0	20970	1	20.97	0	0	0	3.59	17	8	48	0	7	1	2	0	0	0	0	1	0	1	0	0	0	0	1	0	0	0	1	0.0483817	0	0	1	0
22012	5	1	116	24427	78.5	0	1	0	0	0	33000	1	33	0	0	0	1.037	13	6	70	0	7	1	3	0	0	0	0	1	0	1	0	0	0	0	0	0	0	0	0	0.0483817	0	0	1	0
22013	5	1	116	24427	5338	0	1	0	0	0	3550	1	3.55	0	0	0	0.2	6	3.1	40	0	1	1	1	1	0	0	0	1	0	1	0	0	0	0	0	0	0	0	0	0.0483817	0	0	1	0
22014	5	1	116	24427	785	0	1	0	0	0	11070	1	11.07	0	0	0	1.25	7	3.2	40	0	1	1	1		0	0	0	1	0	1	0	0	0	0	1	0	0	0	0	0.0483817	0	0	1	0
22015	5	1	116	24427	785	0	1	0	0	0	7840	1	7.84	0	0	0	1.25	11	5.4	60	0	6	1	3	0	0	0	1	0	0	1	0	0	0	0	1	0	0	0	1	0.0483817	0	0	1	0
21801	5	1	117	24401	1228.5	0	0	0	0	1	2170	1	2.17	0	0	0	0.379	7	3.6	42	0	1	1	2	0	0	0	0	1	0	1	0	0	0	0	0	0	0	0	0	0.0153061	1	0	0	0
21802	5	1	117	24401	19.5	0	0	0	0	1	15630	1	15.63	0	0	0	1.088	4	2.3	45	0	1	1	1	1	0	0	0	1	0	1	0	0	0	0	0	0	0	0	1	0.0153061	1	0	0	0
21803	5	1	117	24401	19.5	0	0	0	0	1	15960	1	15.96	0	0	0	1.062	5	2.8	64	0	7	1	3	0	0	0	0	1	0	1	0	0	0	0	0	0	0	0	0	0.0153061	1	0	0	0
21804	5	1	117	24401	19.5	0	0	0	0	1	7560	1	7.56	0	0	0	1.28	5	2.6	37	1	1	1	3	0	0	0	0	0	1	1	0	0	0	0	0	0	0	0	0	0.0153061	1	0	0	0
21805	5	1	117	24401	19.5	0	0	0	0	1	7750	1	7.75	0	0	0	1.265	5	3	45	0	1	1	3	1	0	0	0	1	0	1	0	0	0	0	0	0	0	0	0	0.0153061	1	0	0	0
21806	5	1	117	24401	19.5	0	0	0	0	1	23620	1	23.62	0	0	0	1.821	13	6	50	0	5	1	3	1	0	0	0	1	0	1	0	0	0	0	0	0	1	0	1	0.0153061	1	0	0	0
21807	5	1	117	24401	2886	0	0	0	0	1	2860	1	2.86	0	0	0	0.152	2	1.5	72	0	1	1	2	1	1	0	0	0	0	1	0	0	0	0	0	0	0	0	0	0.0153061	1	0	0	0
21808	5	1	117	24401	2886	0	0	0	1	0	3200	1	3.2	0	0	0	0.121	7	3.4	45	0	1	1	2	1	0	0	0	1	0	1	0	0	0	0	0	0	0	0	0	0.0153061	1	0	0	0
21809	5	1	117	24402	3996	0	0	0	0	1	7000	1	7	0	0	0	0.506	4	2.1	26	0	1	1	2	0	0	0	0	1	0	1	0	0	0	0	0	0	0	0	0	0.0153061	1	0	0	0
21810	5	1	117	24402	594	0	0	0	0	1	19100	1	19.1	0	0	0	1.012	2	1.5	27	0	7	1	1	1	1	0	0	0	0	1	0	0	0	0	1	0	0	0	0	0.0153061	1	0	0	0
21811	5	1	117	24402	594	0	0	0	0	1	39550	1	39.55	0	0	0	1.025	3	1.8	28	0	7	1	2	0	1	0	0	0	0	1	0	0	0	0	0	0	0	0	0	0.0153061	1	0	0	0
21812	5	1	117	24402	540	0	0	0	0	1	95000	1	95	0	0	0	1.27	4	2.5	98	0	5	1	2	0	0	0	0	1	0	1	0	0	0	0	0	0	0	0	1	0.0153061	1	0	0	0
21813	5	1	117	24402	540	0	0	0	0	1	4610	1	4.61	0	0	0	0.759	7	3.8	45	0	1	1	2	1	1	0	0	0	0	1	0	0	0	0	1	0	0	0	0	0.0153061	1	0	0	0
21814	5	1	117	24402	25380	0	0	0	0	1	15065	1	15.065	0	0	0	0.9	7	3	35	0	5	1	2	0	0	0	0	1	0	1	0	0	0	0	0	0	0	0	0	0.0153061	1	0	0	0
21815	5	1	117	24402	540	0	0	0	0	1	44475	1	44.475	0	0	0	1.3	7	3.6	58	0	2	1	1	0	0	0	0	0	1	1	0	0	0	0	0	0	0	0	0	0.0153061	1	0	0	0
21816	5	1	117	24402	540	0	0	0	0	1	36300	1	36.3	0	0	0	1.007	7	4	45	0	5	1	1	0	1	0	0	0	0	1	0	0	0	0	1	0	0	0	0	0.0153061	1	0	0	0
21904	5	1	117	24414	175.5	1	0	0	0	0	incomplete data	0				1	0.051	7	3.4	40	0	1	1	3		0	0	0	1	0	1	0	0	0	0	0	0	1	0	0	0.0153061	0	1	0	1
21905	5	1	117	24414	19.5	0	0	0	0	1	20675	1	20.675	12	1	0	1.644	5	3	56	0	8	1	3	0	0	0	1	0	0	1	0	0	0	0	0	1	0	0	0	0.0153061	1	0	0	0
21906	5	1	117	24414	19.5	1	0	0	0	0	7510	1	7.51	4	1	0	1.619	4	2.5	85	0	1	1	2	0	1	0	0	0	0	1	0	0	0	0	0	1	1	0	0	0.0153061	1	0	0	0
21907	5	1	117	24414	19.5	0	0	0	0	1	2770	1	2.77	8	1	0	2.581	5	2.6	78	0	1	1	3	0	0	0	0	1	0	1	0	0	0	0	0	1	0	0	0	0.0153061	1	0	0	0
21908	5	1	117	24414	6552	0	0	0	0	1	incomplete data	0				0	1.265	5	2.8	43	0	12	1	3	0	0	0	0	1	0	1	0	0	0	0	0	1	0	0	0	0.0153061	0	1	0	1
21909	5	1	117	24414	409.5	0	0	0	0	1	11370	1	11.37	0	0	0	1.566	5	2.4	38	0	7	1	3	0	1	0	0	0	0	1	0	0	0	0	0	0	0	0	1	0.0153061	1	0	0	0
21910	5	1	117	24414	409.5	0	1	0	0	0	12300	1	12.3	0	0	0	0.455	8	3.5	90	0	1	1	2	0	0	1	0	0	0	1	0	0	0	0	0	0	0	0	1	0.0153061	1	0	0	0
21911	5	1	117	24414	273	0	0	0	0	1	62010	1	62.01	4	1	0	2.176	7	3.6	67	0	8	1	3	0	1	0	0	0	0	1	0	0	0	0	0	1	0	0	1	0.0153061	1	0	0	0
22016	5	1	117	24428	1998	0	1	0	0	0	33260	1	33.26	0	0	0	1.012	5	2.8	65	0	5	1	1	1	1	0	0	0	0	1	0	0	0	0	0	0	0	0	0	0.0153061	1	0	0	0
22017	5	1	117	24428	1998	0	0	1	0	0	3600	1	3.6	0	0	0	0.303	2	1.5	30	0	1	1	1	1	0	0	0	1	0	1	0	0	0	0	0	0	0	0	0	0.0153061	1	0	0	0
22018	5	1	117	24428	972	0	0	1	0	0	29850	1	29.85	0	0	0	1.062	4	2.1	30	0	1	1	1		1	0	0	0	0	1	0	0	0	0	0	0	0	0	0	0.0153061	1	0	0	0
22019	5	1	117	24428	972	0	1	0	0	0	11980	1	11.98	0	0	0	0.91	4	2.3	45	0	5	1	1	1	1	0	0	0	0	1	0	0	0	0	0	0	0	0	0	0.0153061	1	0	0	0
22020	5	1	117	24428	135	0	0	0	0	1	69050	1	69.05	0	0	0	3.289	5	3	35	0	8	1	2		0	0	0	1	0	1	0	0	0	0	0	0	0	0	0	0.0153061	1	0	0	0
22021	5	1	117	24428	135	0	0	0	0	1	77060	1	77.06	0	0	0	4.933	8	4.1	42	0	6	1	1	0	0	0	1	0	0	1	0	0	0	0	1	0	0	0	0	0.0153061	1	0	0	0
22022	5	1	117	24428	135	0	0	0	0	1	23710	1	23.71	0	0	0	2.075	6	3.3	48	0	5	1	2	1	1	0	0	0	0	1	0	0	0	0	0	0	0	0	0	0.0153061	1	0	0	0
22023	5	1	117	24428	135	0	0	0	0	1	117400	1	117.4	0	0	0	5.058	7	4	62	0	6	1	1	1	1	0	0	0	0	1	0	0	1	0	1	0	0	0	0	0.0153061	1	0	0	0
21793	5	1	118	24400	10.5	0	0	0	0	1	6600	1	6.6	0	0	0	0.25	3	1.6	35	1	7	1	2	0	0	0	0	0	1	1	0	0	0	0	0	0	0	0	0	0.074922	1	0	1	0
21794	5	1	118	24400	735	0	0	0	0	1	16700	1	16.7	0	0	0	0.4	6	2.9	40	0	7	1	1		0	0	0	1	0	1	1	0	0	0	0	0	0	0	1	0.074922	1	0	1	0
21795	5	1	118	24400	9240	0	0	0	0	1	560	1	0.56	0	0	0	0.05	7	3.8	42	0	8	1	1	0	0	0	0	1	0	1	0	0	0	0	0	0	0	0	0	0.074922	1	0	1	0
21796	5	1	118	24400	168	0	0	0	0	1	23850	1	23.85	0	0	0	1.074	9	4	48	0	6	1	1	0	1	0	0	0	0	1	0	0	0	0	1	0	0	0	0	0.074922	1	0	1	0
21797	5	1	118	24400	168	0	0	0	0	1	27050	1	27.05	0	0	0	0.922	6	2.9	36	0	10	1	1	0	0	0	0	1	0	1	0	0	0	0	1	0	0	0	0	0.074922	1	0	1	0
21798	5	1	118	24400	168	0	0	0	0	1	26950	1	26.95	0	0	0	0.404	2	1.5	28	0	8	1	1		1	0	0	0	0	1	0	0	0	0	1	0	0	0	0	0.074922	1	0	1	0
21799	5	1	118	24400	168	0	0	0	0	1	5600	1	5.6	0	0	0	0.911	5	3	70	0	7	1	2	0	0	0	0	1	0	1	0	0	0	0	1	0	0	0	0	0.074922	1	0	1	0
21800	5	1	118	24400	168	0	0	0	0	1	35350	1	35.35	0	0	0	1.518	4	2.5	60	0	7	1	1	1	1	0	0	0	0	1	1	0	0	0	1	0	0	0	0	0.074922	1	0	1	0
21833	5	1	118	24405	255.06	0	1	0	0	0	18800	1	18.8	0	0	0	0.91	7	3.4	60	0	1	1	3	0	0	0	0	1	0	1	0	0	0	0	0	0	0	0	0	0.074922	1	0	1	0
21834	5	1	118	24405	255.06	0	1	0	0	0	770	1	0.77	0	0	0	0.19	3	1.8	28	0	10	1	1	0	0	0	0	1	0	1	0	0	0	0	0	0	0	0	0	0.074922	1	0	1	0
21835	5	1	118	24405	255.06	0	0	0	0	1	-850	0		0	0	0	0.165	4	2.1	35	0	7	1	2	1	0	0	0	1	0	0	0	0	0	0	0	0	0	0	0	0.074922	0	1	0	1
21836	5	1	118	24405	255.06	0	0	0	0	1	4925	1	4.925	0	0	0	0.152	10	4.5	42	0	5	1	1	1	0	0	0	1	0	1	0	0	0	0	0	0	0	0	0	0.074922	1	0	1	0
21837	5	1	118	24405	255.06	0	0	0	0	1	1350	1	1.35	0	0	0	0.15	2	1.5	66	0	1	1	2	0	0	1	0	0	0	1	0	0	0	0	0	0	0	0	0	0.074922	1	0	1	0
21838	5	1	118	24405	255.06	0	0	0	0	1	-240	1	-0.24	0	0	0	0.177	2	1.5	62	0	1	1	1	1	0	1	0	0	0	1	0	0	0	0	0	0	0	0	0	0.074922	1	0	1	0
21839	5	1	118	24405	255.06	0	0	0	0	1	-1800	1	-1.8	0	0	0	0.152	2	1.5	38	0	7	1	1	0	0	0	0	1	0	1	0	0	0	0	0	0	0	0	0	0.074922	1	0	1	0
21840	5	1	118	24405	255.06	0	1	0	0	0	3100	1	3.1	10	1	0	0.163	8	3.9	50	0	1	1	1		0	0	0	1	0	1	0	0	0	0	0	0	0	0	1	0.074922	1	0	1	0
21881	5	1	118	24411	346.5	0	0	0	0	1	2750	1	2.75	0	0	0	0.025	6	2.7	33	0	7	1	3	1	0	0	1	0	0	1	0	0	0	0	0	1	0	0	0	0.074922	1	0	1	0
21882	5	1	118	24411	21	0	0	0	0	1	2400	1	2.4	0	0	0	1.5	6	2.7	36	0	8	1	3	0	0	0	0	1	0	1	0	0	0	0	0	1	0	0	0	0.074922	1	0	1	0
21883	5	1	118	24411	31.5	0	0	0	0	1	28900	1	28.9	0	0	0	3.05	8	3.3	38	0	8	1	3	0	0	0	0	1	0	1	0	0	0	0	0	1	0	0	0	0.074922	1	0	1	0
21884	5	1	118	24411	31.5	0	0	0	0	1	72500	1	72.5	0	0	0	2.5	8	3.9	43	0	12	1	3	0	0	0	0	1	0	1	0	0	0	0	0	1	0	0	0	0.074922	1	0	1	0
21885	5	1	118	24411	3906	0	0	0	0	1	incomplete data	0				1	0.012	8	4.3	55	0	1	1	3	0	0	0	0	1	0	1	0	0	0	0	0	1	0	0	0	0.074922	0	1	0	1
21886	5	1	118	24411	630	0	0	0	0	1	8100	1	8.1	0	0	0	0.51	7	3.6	60	1	1	0	3	0	0	0	0	1	0	1	0	0	1	0	1	0	0	0	1	0.074922	1	0	1	0
21887	5	1	118	24411	126	0	0	0	0	1	29890	1	29.89	0	0	0	1.523	8	3.7	38	0	8	1	3		0	0	0	1	0	1	0	0	0	0	0	0	0	0	1	0.074922	1	0	1	0
21888	5	1	118	24411	126	0	0	0	0	1	34030	1	34.03	0	0	0	3.311	8	4.3	48	0	6	1	2	1	0	0	0	0	0	1	0	0	0	0	1	0	0	0	0	0.074922	1	0	1	0
21889	5	1	118	24412	847	0	0	0	0	1	16553	1	16.553	0	0	0	1.265	8	3.7	45	0	7	1	2	0	0	0	0	1	0	1	1	0	0	0	0	0	1	0	0	0.074922	1	0	1	0
21890	5	1	118	24412	269.5	0	0	0	0	1	4685	1	4.685	0	0	0	0.607	3	2	55	0	1	1	2	0	0	0	0	1	0	1	1	0	0	0	0	0	1	0	0	0.074922	1	0	1	0
21891	5	1	118	24412	57.75	0	0	0	0	1	13150	1	13.15	0	0	0	2.53	10	5.5	65	0	13	1	3	0	0	0	0	1	0	1	1	0	1	0	1	0	1	0	0	0.074922	1	0	1	0
21892	5	1	118	24412	57.75	0	0	0	0	1	6170	1	6.17	0	0	0	0.253	2	1.5	60	0	1	1	1	1	0	0	0	1	0	1	1	0	0	0	0	0	1	0	0	0.074922	1	0	1	0
21893	5	1	118	24412	57.75	0	0	0	0	1	30840	1	30.84	0	0	0	3.946	11	4.8	57	0	7	1	2	0	0	0	0	1	0	1	1	0	1	0	0	0	1	0	0	0.074922	1	0	1	0
21894	5	1	118	24412	57.75	0	0	0	0	1	8500	1	8.5	0	0	0	0.456	8	4.5	58	0	5	1	2	0	0	0	0	1	0	1	1	0	0	0	0	0	1	0	0	0.074922	1	0	1	0
21895	5	1	118	24412	4466	0	0	0	0	1	6880	1	6.88	0	0	0	0.506	5	2.8	60	0	1	1	1	1	0	0	0	1	0	1	1	0	1	0	0	0	1	0	0	0.074922	1	0	1	0
21896	5	1	118	24412	154	0	0	0	0	1	3410	1	3.41	0	0	0	0.253	4	2.3	20	0	1	1	1	0	0	0	0	1	0	1	1	0	1	0	0	0	1	0	0	0.074922	1	0	1	0
22040	5	1	119	24431	632.81	0	0	1	0	0	11500	1	11.5	0	0	0	0.162	6	3.5	47	0	6	1	2	1	0	0	0	0	0	1	0	0	0	0	0	1	1	0	1	0.0332589	0	1	0	1
22041	5	1	119	24431	632.81	0	0	1	0	0	12050	1	12.05	0	0	0	0.275	7	4	45	0	7	1	3	1	0	0	0	1	0	1	0	0	0	0	0	0	1	0	0	0.0332589	0	1	0	1
22042	5	1	119	24431	632.81	0	0	1	0	0	6460	1	6.46	0	0	0	0.15	8	4.3	45	0	1	1	3	1	0	0	1	0	0	1	0	0	0	0	0	1	1	0	0	0.0332589	0	1	0	1
22043	5	1	119	24431	632.81	0	0	1	0	0	2450	1	2.45	0	0	0	0.312	3	1.8	40	0	10	1	3		0	0	0	1	0	1	0	0	0	0	0	0	1	0	0	0.0332589	0	1	0	1
22044	5	1	119	24431	632.81	0	0	1	0	0	20000	1	20	2	1	0	0.35	5	2.8	32	0	7	1	3		0	0	0	0	0	1	0	0	0	0	0	1	1	0	0	0.0332589	0	1	0	1
22045	5	1	119	24431	632.81	0	0	1	0	0	10400	1	10.4	0	0	0	0.25	6	3.3	55	0	1	1	3	1	0	0	0	1	0	1	0	0	0	0	0	1	1	0	0	0.0332589	0	1	0	1
22046	5	1	119	24431	632.81	0	0	1	0	0	9500	1	9.5	0	0	0	0.225	5	2.8	58	0	1	1	3	1	0	0	0	1	0	1	0	0	0	0	0	1	1	0	0	0.0332589	0	1	0	1
22047	5	1	119	24431	632.81	0	0	1	0	0	8975	1	8.975	0	0	0	0.2	7	3.8	60	0	1	1	3	0	0	0	0	1	0	1	0	0	0	0	0	1	0	0	1	0.0332589	0	1	0	1
22360	5	1	119	24473	187.5	0	1	0	0	0	3120	1	3.12	0	0	0	0.1	3	1.8	32	0	1	0	2		0	0	0	1	0	1	0	0	0	0	0	1	0	0	0	0.0332589	0	1	0	1
22032	5	1	120	24430	2596	0	0	0	0	1	60725	1	60.725	0	0	0	0.705	8	4.3	50	0	8	1	2	0	0	0	0	1	0	1	0	0	1	0	1	1	1	0	1	0.496436	1	0	0	0
22033	5	1	120	24430	29.5	0	0	0	0	1	627650	0		5	1	0	1.518	20	10.1	69	0	8	1	3	0	0	0	0	1	0	1	0	0	0	1	1	1	1	0	1	0.496436	0	1	0	1
22034	5	1	120	24430	4680.67	0	0	0	0	1	237205	1	237.205	0	0	0	0.531	5	3	60	0	7	1	2	1	1	0	0	0	0	1	0	0	1	1	1	1	1	0	0	0.496436	1	0	0	0
22035	5	1	120	24430	4680.67	0	0	0	0	1	47650	1	47.65	5	1	0	0.455	14	7.1	48	0	1	1	3	0	0	0	1	0	0	1	0	0	1	0	1	1	1	0	1	0.496436	1	0	0	0
22036	5	1	120	24430	4680.67	0	0	0	0	1	16870	1	16.87	0	0	0	0.182	8	4.3	48	0	1	1	2	1	0	0	1	0	0	1	0	0	1	0	1	1	1	0	0	0.496436	1	0	0	0
22037	5	1	120	24430	206.5	0	0	0	0	1	270400	1	270.4	5	1	0	1.153	7	3.4	67	0	1	1	3	1	0	0	0	1	0	1	0	0	1	1	1	1	1	0	1	0.496436	1	0	0	0
22038	5	1	120	24430	206.5	0	0	0	0	1	258480	1	258.48	5	1	0	1.096	7	3.8	65	0	6	1	2	1	1	0	0	0	0	1	0	0	1	1	0	1	1	0	1	0.496436	1	0	0	0
22039	5	1	120	24430	206.5	0	0	0	0	1	313475	1	313.475	5	1	0	1.063	6	3.5	45	0	13	1	3	0	0	0	0	1	0	1	0	0	1	1	0	1	1	0	1	0.496436	1	0	0	0
22072	5	1	120	24435	912	0	0	0	0	1	176950	1	176.95	7	1	0	0.354	10	5.3	50	0	1	1	2	1	0	0	0	1	0	1	0	0	0	1	1	1	1	0	1	0.496436	1	0	0	0
22073	5	1	120	24435	912	0	0	0	0	1	701360	0		7	1	0	0.91	8	4.5	54	0	8	1	3	0	1	0	0	0	0	1	0	0	0	1	0	1	1	0	1	0.496436	0	1	0	1
22074	5	1	120	24435	532	0	0	0	0	1	85340	1	85.34	4	1	0	0.253	5	2.8	42	1	1	1	2	1	0	0	0	0	1	1	0	0	0	1	0	1	0	0	1	0.496436	1	0	0	0
22075	5	1	120	24435	532	0	0	0	0	1	689850	0		7	1	0	0.86	4	2.3	42	0	8	1	3	0	1	0	0	0	0	1	0	0	0	1	1	1	1	0	1	0.496436	0	1	0	1
22076	5	1	120	24435	532	0	0	0	0	1	148530	1	148.53	7	1	0	0.961	16	8.1	57	0	7	1	3	0	1	0	0	0	0	1	0	0	0	1	1	1	1	0	1	0.496436	1	0	0	0
22077	5	1	120	24435	114	0	0	0	0	1	157520	1	157.52	7	1	0	0.961	5	3	40	0	6	1	3	0	1	0	0	0	0	1	0	0	0	1	1	1	1	0	1	0.496436	1	0	0	0
22078	5	1	120	24435	114	0	0	0	0	1	769990	0		7	1	0	0.909	6	3.5	50	0	6	1	3	0	1	0	0	0	0	1	0	0	0	1	0	1	1	0	1	0.496436	0	1	0	1
22079	5	1	120	24435	114	0	0	0	0	1	2700000	0		7	1	0	3.08	5	2.4	37	0	12	1	3	1	1	0	0	0	0	1	0	0	0	1	1	1	1	0	1	0.496436	0	1	0	1
22377	5	1	120	24476	798	0	0	0	0	1	193455	1	193.455	16	1	0	0.455	4	2.5	47	0	12	1	3	0	1	0	0	0	0	1	0	0	0	1	1	1	1	0	1	0.496436	1	0	0	0
22378	5	1	120	24476	798	0	0	0	0	1	87130	1	87.13	15	1	0	0.531	12	5.9	65	0	1	1	2	0	1	0	0	0	0	1	0	0	0	1	0	1	1	0	0	0.496436	1	0	0	0
22379	5	1	120	24476	798	0	0	0	0	1	112000	1	112	8	1	0	0.455	5	3	55	0	7	1	3	0	1	0	0	0	0	1	0	0	0	1	1	1	1	0	1	0.496436	1	0	0	0
22380	5	1	120	24476	798	0	0	0	0	1	442420	1	442.42	11	1	0	0.353	13	6.2	60	0	1	1	3	0	1	0	0	0	0	1	0	0	0	1	0	1	1	0	1	0.496436	1	0	0	0
22381	5	1	120	24476	798	0	0	0	0	1	36390	1	36.39	16	1	0	0.405	4	2.5	45	0	1	1	3	0	1	0	0	0	0	1	0	0	0	1	0	1	0	0	1	0.496436	1	0	0	0
22382	5	1	120	24476	798	0	0	0	0	1	193455	1	193.455	16	1	0	0.455	5	2.8	45	0	6	1	3	0	1	0	0	0	0	1	0	0	1	1	1	1	1	0	0	0.496436	1	0	0	0
22383	5	1	120	24476	798	0	0	0	0	1	73850	1	73.85	16	1	0	0.405	3	2	46	0	6	1	3	1	1	0	0	0	0	1	0	0	0	1	1	1	1	0	1	0.496436	1	0	0	0
22384	5	1	120	24476	114	0	0	0	0	1	104280	1	104.28	16	1	0	0.848	9	4.8	55	0	1	1	3	0	0	0	0	1	0	1	0	0	1	1	1	1	1	0	0	0.496436	1	0	0	0
22385	5	1	120	24477	806.34	0	0	0	0	1	13025	1	13.025	0	0	0	0.171	5	2.8	48	0	1	1	3	1	0	0	1	0	0	1	0	0	1	0	1	1	0	0	1	0.496436	1	0	0	0
22386	5	1	120	24477	806.34	0	0	0	0	1	83800	1	83.8	0	0	0	0.715	5	3	59	0	12	1	3	0	0	0	0	1	0	1	0	0	1	1	1	1	0	0	1	0.496436	1	0	0	0
22387	5	1	120	24477	806.34	0	0	0	0	1	258625	1	258.625	0	0	0	0.757	5	3	62	0	13	1	3	0	1	0	0	0	0	1	0	0	1	1	1	1	0	0	1	0.496436	1	0	0	0
22388	5	1	120	24477	29.5	0	0	0	0	1	361050	1	361.05	0	0	0	1.532	13	6.2	64	0	12	1	3	0	1	0	0	0	0	1	0	0	1	1	0	1	1	0	1	0.496436	1	0	0	0
22389	5	1	120	24477	2910.67	0	0	0	0	1	54550	1	54.55	4	1	0	0.404	5	3	48	0	1	1	3	1	1	0	0	0	0	1	0	0	0	0	1	1	1	0	0	0.496436	1	0	0	0
22390	5	1	120	24477	2910.67	0	0	0	0	1	38585	1	38.585	8	1	0	0.353	4	2.1	38	0	5	1	3	1	0	0	1	0	0	1	0	0	0	0	0	1	1	0	0	0.496436	1	0	0	0
22391	5	1	120	24477	2910.67	0	0	0	0	1	30300	1	30.3	4	1	0	0.303	8	4.1	50	0	1	1	3	1	1	0	0	0	0	1	0	0	0	1	0	1	1	0	0	0.496436	1	0	0	0
22392	5	1	120	24477	118	0	0	0	0	1	72500	1	72.5	0	0	0	0.679	6	3.5	59	0	8	1	3	1	1	0	0	0	0	1	0	0	0	1	0	1	1	0	0	0.496436	1	0	0	0
22056	5	1	121	24433	1598	0	0	1	0	0	36875	1	36.875	12	1	0	0.303	4	2.3	40	0	7	1	3	1	1	0	0	0	0	0	0	0	0	1	1	1	0	0	0	0.489356	1	0	1	0
22057	5	1	121	24433	35.25	0	0	1	0	0	131060	1	131.06	9	1	0	0.555	9	4.8	52	0	7	1	3	0	1	0	0	0	0	0	0	0	1	1	1	1	0	0	0	0.489356	1	0	1	0
22058	5	1	121	24433	35.25	0	0	1	0	0	58340	1	58.34	9	1	0	0.303	4	2.3	38	0	7	1	3	0	1	0	0	0	0	1	0	0	0	1	1	1	0	0	0	0.489356	1	0	1	0
22059	5	1	121	24433	35.25	0	0	1	0	0	83650	1	83.65	16	1	0	0.303	6	3.5	45	0	7	1	3	0	1	0	0	0	0	1	0	0	1	1	1	1	0	0	0	0.489356	1	0	1	0
22060	5	1	121	24433	35.25	0	0	1	0	0	104710	1	104.71	0	0	0	0.809	9	4.6	50	0	8	1	3	0	1	0	0	0	0	0	0	0	1	1	1	1	0	0	0	0.489356	1	0	1	0
22061	5	1	121	24433	70.5	0	0	1	0	0	1670	1	1.67	0	0	0	0.005	4	2.3	39	0	1	0	1	1	1	0	0	0	0	0	0	0	1	0	0	1	0	0	0	0.489356	1	0	1	0
22062	5	1	121	24433	4159.5	0	0	1	0	0	273500	1	273.5	0	0	0	0.455	8	3.9	64	1	1	1	3	1	1	0	0	0	0	1	0	0	1	1	0	1	1	0	0	0.489356	1	0	1	0
22063	5	1	121	24433	70.5	0	0	1	0	0	542900	1	542.9	0	0	0	1.265	8	4.3	48	0	1	1	3	0	1	0	0	0	0	1	0	0	1	1	0	1	1	0	1	0.489356	1	0	1	0
22104	5	1	121	24439	2534	0	0	0	0	1	476634	1	476.634	0	0	0	0.365	5	2.6	49	0	13	1	3	0	0	0	0	1	0	0	0	0	1	1	0	1	0	0	0	0.489356	1	0	1	0
22105	5	1	121	24439	2534	0	0	0	0	1	509400	1	509.4	0	0	0	0.607	4	2.1	40	0	10	1	3	0	1	0	0	0	0	1	0	0	0	1	0	1	0	0	1	0.489356	1	0	1	0
22106	5	1	121	24439	90.5	0	0	0	0	1	978400	0		0	0	0	1.048	8	3.9	34	0	8	1	3	0	1	0	0	0	0	0	0	0	0	1	0	1	0	0	0	0.489356	0	1	0	1
22107	5	1	121	24439	90.5	0	0	0	0	1	1400000	0		0	0	0	0.932	9	4.6	59	0	8	1	3	0	1	0	0	0	0	0	0	0	0	1	1	1	0	0	0	0.489356	0	1	0	1
22108	5	1	121	24439	1719.5	0	0	0	0	1	507900	1	507.9	0	0	0	0.405	7	3.8	58	0	6	1	3		1	0	0	0	0	1	0	0	0	1	0	1	0	0	1	0.489356	1	0	1	0
22109	5	1	121	24439	1719.5	0	0	0	0	1	283870	1	283.87	4	1	0	0.253	5	3	42	0	8	1	3	0	0	0	0	1	0	0	0	0	0	1	0	1	0	0	0	0.489356	1	0	1	0
22110	5	1	121	24439	1719.5	0	0	0	0	1	468400	1	468.4	0	0	0	0.354	6	3.1	60	0	1	1	3	0	1	0	0	0	0	0	0	0	1	1	1	1	0	0	1	0.489356	1	0	1	0
22111	5	1	121	24439	1719.5	0	0	0	0	1	390900	1	390.9	4	1	0	0.304	3	1.8	33	0	7	1	3	0	1	0	0	0	0	0	0	0	0	1	1	1	0	0	1	0.489356	1	0	1	0
22393	5	1	121	24478	893.69	0	0	0	0	1	399260	1	399.26	13	1	0	0.506	7	3.6	55	0	1	1	3	0	1	0	0	0	0	0	0	0	1	1	0	1	0	0	1	0.489356	1	0	1	0
22394	5	1	121	24478	893.69	0	0	0	0	1	219000	1	219	11	1	0	0.153	4	2.3	45	0	7	1	3	1	1	0	0	0	0	0	0	0	1	1	0	1	0	0	1	0.489356	1	0	1	0
22395	5	1	121	24478	893.69	0	0	0	0	1	430050	1	430.05	10	1	0	0.353	7	3.8	48	0	8	1	3	0	1	0	0	0	0	0	0	0	1	1	0	1	0	0	1	0.489356	1	0	1	0
22396	5	1	121	24478	893.69	0	0	0	0	1	311800	1	311.8	14	1	0	0.202	7	3.8	50	0	6	1	3	1	1	0	0	0	0	0	0	0	0	1	1	1	0	0	1	0.489356	1	0	1	0
22397	5	1	121	24478	893.69	0	0	0	0	1	363290	1	363.29	12	1	0	0.405	4	2.5	46	1	7	1	3	0	1	0	0	0	0	0	0	0	1	1	0	1	0	0	1	0.489356	1	0	1	0
22398	5	1	121	24478	893.69	0	0	0	0	1	329070	1	329.07	10	1	0	0.303	7	3.4	38	0	7	1	3	0	1	0	0	0	0	0	0	0	0	1	0	1	0	0	1	0.489356	1	0	1	0
22399	5	1	121	24478	893.69	0	0	0	0	1	248810	1	248.81	12	1	0	0.253	7	3.2	40	0	1	1	3	0	1	0	0	0	0	0	0	0	0	1	1	1	0	0	1	0.489356	1	0	1	0
22400	5	1	121	24478	893.69	0	0	0	0	1	220350	1	220.35	7	1	0	0.101	5	2.4	38	0	1	1	3	0	1	0	0	0	0	0	0	0	0	1	0	1	0	0	1	0.489356	1	0	1	0
22425	5	1	121	24484	446.5	0	0	0	0	1	30355	1	30.355	16	1	0	0.506	4	2.5	50	0	7	1	3	0	0	0	0	1	0	1	0	0	0	1	0	1	1	0	1	0.489356	1	0	1	0
22426	5	1	121	24484	446.5	0	0	0	0	1	65140	1	65.14	16	1	0	0.506	4	2.1	34	0	8	1	3	1	0	0	0	0	0	1	0	0	0	1	1	1	1	0	0	0.489356	1	0	1	0
22427	5	1	121	24484	446.5	0	0	0	0	1	111060	1	111.06	16	1	0	0.759	6	3.3	58	0	10	1	3	0	0	0	0	1	0	1	0	0	0	1	1	1	1	0	1	0.489356	1	0	1	0
22428	5	1	121	24484	446.5	0	0	0	0	1	195220	1	195.22	16	1	0	0.353	3	1.8	32	0	12	1	3	0	0	0	0	1	0	1	0	0	0	1	1	1	1	0	1	0.489356	1	0	1	0
22429	5	1	121	24484	2432.25	0	0	0	0	1	36030	1	36.03	16	1	0	0.304	7	3.8	55	0	8	1	3	0	0	0	0	1	0	1	0	0	0	1	0	1	0	0	1	0.489356	1	0	1	0
22430	5	1	121	24484	2432.25	0	0	0	0	1	111775	1	111.775	16	1	0	0.455	9	4.8	58	0	1	1	3	0	0	0	0	1	0	1	0	0	1	1	1	1	1	0	1	0.489356	1	0	1	0
22431	5	1	121	24484	2432.25	0	0	0	0	1	197570	1	197.57	16	1	0	0.353	4	2.5	50	1	1	1	3	0	0	0	0	1	0	1	0	0	0	1	1	1	1	0	1	0.489356	1	0	1	0
22432	5	1	121	24484	2432.25	0	0	0	0	1	65170	1	65.17	16	1	0	0.304	4	2.1	34	0	6	1	3	1	0	0	0	0	0	1	0	0	1	1	1	1	1	0	0	0.489356	1	0	1	0
22080	5	1	122	24436	1525	0	0	1	0	0	81280	1	81.28	0	0	0	0.875	10	4.7	65	0	1	1	3	0	1	0	0	0	0	1	0	0	1	1	0	1	0	0	0	0.0020319	0	0	0	0
22081	5	1	122	24436	1525	0	0	1	0	0	7000	1	7	0	0	0	0.075	4	2.5	56	0	1	1	3	0	0	0	0	1	0	0	0	0	0	0	0	1	0	0	0	0.0020319	0	0	0	0
22082	5	1	122	24436	100	0	0	1	0	0	98550	1	98.55	10	1	0	1.55	6	3.5	68	0	7	1	3	0	1	0	0	0	0	1	0	0	1	0	0	1	0	0	0	0.0020319	0	0	0	0
22083	5	1	122	24436	100	0	0	1	0	0	37250	1	37.25	0	0	0	0.885	8	4.1	40	0	1	1	3	0	1	0	0	0	0	1	0	0	1	0	0	1	0	0	0	0.0020319	0	0	0	0
22084	5	1	122	24436	100	0	0	1	0	0	23395	1	23.395	5	1	0	0.825	12	5.7	55	0	7	1	3	0	1	0	0	0	0	1	0	0	1	0	0	1	0	0	0	0.0020319	0	0	0	0
22085	5	1	122	24436	100	0	0	1	0	0	59170	1	59.17	10	1	0	1.05	9	4.8	58	0	1	1	3	0	0	0	0	1	0	1	0	0	1	0	0	1	0	0	0	0.0020319	0	0	0	0
22086	5	1	122	24436	50	0	0	1	0	0	94480	1	94.48	0	0	0	2.327	10	4.5	67	0	1	1	3	0	1	0	0	0	0	1	0	0	1	1	0	1	0	0	0	0.0020319	0	0	0	0
22087	5	1	122	24436	50	0	0	1	0	0	68090	1	68.09	0	0	0	2.124	7	3.4	70	0	1	1	3	0	1	0	0	0	0	1	0	0	1	0	0	1	0	0	0	0.0020319	0	0	0	0
22088	5	1	122	24437	975	0	0	0	0	1	5700	1	5.7	0	0	0	0.303	3	2	40	0	5	1	3	1	0	0	0	1	0	1	0	0	1	0	0	1	0	0	0	0.0020319	0	0	0	0
22089	5	1	122	24437	12.5	0	0	0	0	1	26400	1	26.4	0	0	0	1.163	5	2.8	45	0	8	1	3	0	0	0	0	0	0	1	0	0	1	0	0	1	0	0	0	0.0020319	0	0	0	0
22090	5	1	122	24437	12.5	0	0	0	0	1	25800	1	25.8	0	0	0	1.113	3	2	40	0	5	1	3	0	0	0	0	0	0	1	0	0	1	0	0	1	0	0	0	0.0020319	0	0	0	0
22091	5	1	122	24437	12.5	0	0	0	0	1	28900	1	28.9	0	0	0	1.265	3	2	42	0	5	1	3	1	0	0	0	0	0	1	0	0	1	0	0	1	0	0	0	0.0020319	0	0	0	0
22092	5	1	122	24437	12.5	0	0	0	0	1	25900	1	25.9	0	0	0	1.057	5	2.8	45	0	5	1	3	1	0	0	0	0	0	1	0	0	1	0	0	1	0	0	0	0.0020319	0	0	0	0
22093	5	1	122	24437	2325	0	0	0	0	1	8000	1	8	0	0	0	0.303	5	3	52	0	5	1	3	1	0	0	0	1	0	1	0	0	1	0	0	1	0	0	0	0.0020319	0	0	0	0
22094	5	1	122	24437	2325	0	0	0	0	1	5600	1	5.6	0	0	0	0.253	5	3	48	0	7	1	3	1	0	0	0	1	0	1	0	0	1	0	0	1	0	0	0	0.0020319	0	0	0	0
22095	5	1	122	24437	2325	0	0	0	0	1	12200	1	12.2	0	0	0	0.354	6	3.5	55	0	5	1	3	1	0	0	0	1	0	1	0	0	1	0	0	1	0	0	0	0.0020319	0	0	0	0
22409	5	1	122	24481	512.5	0	0	0	0	1	8650	1	8.65	0	0	0	0.455	10	4.7	50	0	1	1	2	1	0	0	0	1	0	1	0	0	0	0	0	1	0	0	1	0.0020319	0	0	0	0
22410	5	1	122	24481	512.5	0	0	0	0	1	9550	1	9.55	0	0	0	0.445	9	4.2	42	0	1	1	2	1	0	0	0	1	0	1	0	0	0	0	0	1	0	0	1	0.0020319	0	0	0	0
22411	5	1	122	24481	12.5	0	0	0	0	1	47800	1	47.8	0	0	0	1	7	3.8	60	0	1	1	3	1	0	0	0	0	0	1	0	0	0	1	0	1	0	0	1	0.0020319	0	0	0	0
22412	5	1	122	24481	2850	0	0	0	0	1	7050	1	7.05	0	0	0	0.175	8	3.9	43	0	1	1	2	1	0	0	0	1	0	1	0	0	0	0	0	1	0	0	1	0.0020319	0	0	0	0
22413	5	1	122	24481	2850	0	0	0	0	1	14300	1	14.3	0	0	0	0.36	5	2.4	45	0	10	1	2	0	0	0	0	1	0	1	0	0	0	0	0	1	0	0	1	0.0020319	0	0	0	0
22414	5	1	122	24481	2850	0	0	0	0	1	16400	1	16.4	0	0	0	0.425	5	2.6	45	0	12	1	3	0	0	0	0	1	0	1	0	0	0	1	0	1	0	0	1	0.0020319	0	0	0	0
22415	5	1	122	24481	150	1	0	0	0	0	205100	1	205.1	0	0	0	2.25	11	5.6	89	0	1	1	3	0	0	0	0	0	0	1	0	0	0	1	0	1	0	0	1	0.0020319	0	0	0	0
22416	5	1	122	24481	150	1	0	0	0	0	22100	1	22.1	0	0	0	1.075	7	3.6	70	0	10	1	3	0	0	0	0	0	0	1	0	0	0	0	0	1	0	0	1	0.0020319	0	0	0	0
22417	5	1	122	24482	837.5	0	1	0	0	0	21950	1	21.95	0	0	0	0.357	5	2.8	51	1	1	1	3	0	0	0	0	1	0	1	1	0	0	0	1	0	0	0	0	0.0020319	0	0	0	0
22418	5	1	122	24482	837.5	0	1	0	0	0	1390	1	1.39	0	0	0	0.016	4	2.3	45	0	1	1	3	1	0	0	0	1	0	0	1	0	0	0	1	0	0	0	0	0.0020319	0	0	0	0
22419	5	1	122	24482	837.5	0	1	0	0	0	11745	1	11.745	0	0	0	0.207	4	2.1	39	0	1	1	3	0	0	0	0	1	0	1	1	0	0	0	1	0	0	0	0	0.0020319	0	0	0	0
22420	5	1	122	24482	837.5	0	1	0	0	0	7814	1	7.814	0	0	0	0.107	6	3.3	45	0	5	1	3	1	0	0	0	1	0	1	1	0	0	0	1	0	0	0	0	0.0020319	0	0	0	0
22421	5	1	122	24482	2287.5	0	1	0	0	0	incomplete data	0				0	0.01	7	3.8	48	0	1	1	3		0	0	0	1	0	1	1	0	0	0	1	0	0	0	0	0.0020319	0	1	0	1
22422	5	1	122	24482	2287.5	0	1	0	0	0	10360	1	10.36	0	0	0	0.157	5	3	45	1	1	1	3	1	0	0	0	1	0	1	1	0	0	0	1	0	0	0	0	0.0020319	0	0	0	0
22423	5	1	122	24482	2287.5	0	1	0	0	0	12250	1	12.25	0	0	0	0.113	4	2.5	29	0	5	1	3	1	0	0	0	1	0	0	1	0	0	0	1	0	0	0	0	0.0020319	0	0	0	0
22424	5	1	122	24482	2287.5	0	1	0	0	0	180	1	0.18	0	0	0	0.015	9	5	58	0	1	1	3	1	0	0	0	1	0	0	1	0	0	0	0	0	0	0	0	0.0020319	0	0	0	0
20646	2	2	201	24210	126.5	0	0	0	1	0	incomplete data	0				0	0.04	4	2.5	69	0	7	1	3	0	0	0	1	0	0	1	0	0	0	0	0	1	1	0	0	0.0418949	0	1	0	1
20647	2	2	201	24210	126.5	0	0	0	0	1	incomplete data	0				0	0.172	6	3.1	52	0	7	1	3	1	0	0	1	0	0	1	0	0	0	0	0	1	1	0	0	0.0418949	0	1	0	1
20648	2	2	201	24213	384	1	0	0	0	0	13475	1	13.475	0	0	0	0.32	3	2	62	0	8	1	3	1	0	0	0	1	0	1	1	0	0	0	0	0	0	0	0	0.0418949	0	0	0	0
20649	2	2	201	24213	384	0	0	0	0	1	6410	1	6.41	0	0	0	0.21	7	4	56	0	7	1	3	1	0	0	0	1	0	1	1	0	0	0	0	0	1	0	0	0.0418949	0	0	0	0
20650	2	2	201	24213	384	1	0	0	0	0	7520	1	7.52	0	0	0	0.19	3	2	42	1	8	1	3	0	0	0	0	0	1	1	0	0	0	0	0	0	1	0	0	0.0418949	0	0	0	0
20651	2	2	201	24213	384	0	0	0	0	1	7130	1	7.13	0	0	0	0.22	5	3	52	0	1	1	3	1	0	0	0	1	0	1	1	0	0	0	0	0	1	0	0	0.0418949	0	0	0	0
20652	2	2	201	24213	768	0	0	0	0	1	7955	1	7.955	0	0	0	0.235	6	2.7	28	0	1	1	2	1	0	0	0	1	0	1	1	0	0	0	0	0	1	0	0	0.0418949	0	0	0	0
20653	2	2	201	24213	768	1	0	0	0	0	10885	1	10.885	0	0	0	0.485	3	2	70	0	1	1	2	1	0	0	0	1	0	1	0	0	0	0	0	0	1	0	0	0.0418949	0	0	0	0
20654	2	2	201	24213	768	1	0	0	0	0	11970	1	11.97	0	0	0	0.34	4	2.3	68	0	1	1	3	1	0	0	0	0	1	1	1	0	0	0	0	0	0	0	0	0.0418949	0	0	0	0
20655	2	2	201	24213	768	1	0	0	0	0	10143	1	10.143	0	0	0	0.45	7	3.8	58	0	1	1	2	1	0	0	0	1	0	1	1	0	0	0	0	0	1	0	0	0.0418949	0	0	0	0
20680	2	2	201	24219	3780	0	0	0	0	1	11100	1	11.1	0	0	0	0.2	6	3.1	70	0	1	1	3	0	0	0	0	1	0	1	0	0	0	0	0	0	0	0	0	0.0418949	0	0	0	0
20681	2	2	201	24219	3780	0	0	0	0	1	0	1	0	0	0	0	0.12	2	1.5	42	1	5	1	3	0	0	0	0	0	1	1	0	0	0	0	0	0	0	0	0	0.0418949	0	0	0	0
20682	2	2	201	24219	98	0	0	0	0	1	1080	1	1.08	0	0	0	1.09	5	2.6	65	1	1	1	3	1	1	0	0	0	0	1	0	0	0	0	0	0	0	0	0	0.0418949	0	0	0	0
20683	2	2	201	24219	98	1	0	0	0	0	3130	1	3.13	0	0	0	0.28	5	2.8	68	0	1	1	2	0	1	0	0	0	0	1	0	0	0	0	0	0	0	0	0	0.0418949	0	0	0	0
20684	2	2	201	24219	98	0	0	0	0	1	3600	1	3.6	6	1	0	1.04	6	3.3	55	0	7	1	3	0	0	0	0	1	0	1	0	0	0	0	0	0	0	0	0	0.0418949	0	0	0	0
20685	2	2	201	24219	98	1	0	0	0	0	7305	1	7.305	12	1	0	1.44	7	3.8	65	0	7	1	3	0	0	0	0	1	0	1	0	0	1	0	0	0	1	0	1	0.0418949	0	0	0	0
20686	2	2	201	24219	98	1	0	0	0	0	7560	1	7.56	0	0	0	1.056	5	2.8	65	0	1	1	3	0	1	0	0	0	0	1	1	0	0	0	0	0	0	0	0	0.0418949	0	0	0	0
20687	2	2	201	24219	98	0	0	0	0	1	12180	1	12.18	12	1	0	1.78	3	2	57	0	11	1	3	0	0	1	0	0	0	1	0	0	1	0	0	1	0	0	1	0.0418949	0	0	0	0
20736	2	2	201	24237	664.13	0	1	0	0	0	2005	1	2.005	0	0	0	0.19	5	2.8	65	0	1	1	3	0	0	0	0	0	1	1	0	0	0	0	0	1	0	0	1	0.0418949	0	0	0	0
20737	2	2	201	24237	664.13	0	1	0	0	0	3225	1	3.225	0	0	0	0.28	6	3.3	46	0	7	1	2	0	0	0	1	0	0	1	0	0	1	0	0	1	0	0	0	0.0418949	0	0	0	0
20738	2	2	201	24237	664.13	0	1	0	0	0	1505	1	1.505	0	0	0	0.35	5	2.6	40	0	1	1	3	0	0	0	0	1	0	1	0	0	0	0	0	1	0	0	1	0.0418949	0	0	0	0
20739	2	2	201	24237	664.13	0	1	0	0	0	2675	1	2.675	0	0	0	0.32	6	3.3	50	0	1	1	2	1	0	0	0	1	0	1	0	0	1	0	0	1	0	0	0	0.0418949	0	0	0	0
20740	2	2	201	24237	664.13	0	1	0	0	0	1535	1	1.535	0	0	0	0.19	4	2.5	50	0	1	1	3	1	0	0	0	1	0	1	0	0	0	0	0	1	0	0	1	0.0418949	0	0	0	0
20741	2	2	201	24237	664.13	0	1	0	0	0	1070	1	1.07	0	0	0	0.12	6	2.7	36	0	6	1	2	0	0	0	0	1	0	1	0	0	0	0	0	1	0	0	0	0.0418949	0	0	0	0
20742	2	2	201	24237	664.13	0	1	0	0	0	1855	1	1.855	0	0	0	0.4	3	2	60	0	1	1	3	1	0	0	0	1	0	1	0	0	1	0	0	0	0	0	0	0.0418949	0	0	0	0
20743	2	2	201	24237	664.13	0	1	0	0	0	1805	1	1.805	0	0	0	0.72	5	2.8	70	0	1	1	2	1	0	0	0	0	1	1	0	0	1	0	0	1	0	0	0	0.0418949	0	0	0	0
20744	2	2	201	24238	3024	0	0	0	0	1	9470	1	9.47	0	0	0	0.32	3	2	47	0	8	1	3	1	0	0	0	1	0	1	0	0	0	0	0	0	0	0	0	0.0418949	0	0	0	0
20745	2	2	201	24238	84	0	0	0	0	1	27465	1	27.465	0	0	0	1.226	4	2.5	49	0	6	1	3	0	1	0	0	0	0	1	0	0	1	0	0	1	0	0	1	0.0418949	0	0	0	0
20746	2	2	201	24238	84	0	0	0	0	1	12620	1	12.62	0	0	0	1.275	4	2.5	65	0	12	1	3	0	0	0	0	0	1	1	0	0	0	1	0	0	0	0	1	0.0418949	0	0	0	0
20747	2	2	201	24238	2520	0	0	0	0	1	3110	1	3.11	0	0	0	0.16	4	2.3	55	0	5	1	3	1	0	0	0	1	0	1	0	0	1	0	0	1	0	0	1	0.0418949	0	0	0	0
20748	2	2	201	24238	2520	0	0	0	0	1	4275	1	4.275	0	0	0	0.22	4	2.1	34	0	8	1	3	0	0	0	0	1	0	1	0	0	1	0	0	1	0	0	0	0.0418949	0	0	0	0
20749	2	2	201	24238	168	0	0	0	0	1	25190	1	25.19	0	0	0	1.035	2	1.5	52	0	1	1	3	0	0	0	1	0	0	1	0	0	0	0	0	0	0	0	1	0.0418949	0	0	0	0
20750	2	2	201	24238	168	0	0	0	0	1	22280	1	22.28	0	0	0	1.576	5	2.8	48	0	8	1	3	0	0	0	0	1	0	1	0	0	1	0	0	1	0	0	0	0.0418949	0	0	0	0
20751	2	2	201	24238	168	0	0	0	0	1	18261	1	18.261	3	1	0	1.08	2	1.5	56	0	7	1	3	0	0	0	1	0	0	1	0	0	1	0	0	1	0	0	1	0.0418949	0	0	0	0
20859	2	2	201	24264	1296	0	0	0	0	1	140	1	0.14	0	0	0	0.48	3	2	41	1	6	1	3	0	0	0	0	0	1	1	0	0	0	0	0	0	0	0	0	0.0418949	0	0	0	0
20860	2	2	201	24264	80	0	0	0	0	1	820	1	0.82	0	0	0	1.18	3	1.8	37	0	10	1	3	0	0	0	0	1	0	1	0	0	0	0	0	0	0	0	0	0.0418949	0	0	0	0
20861	2	2	201	24264	80	0	0	0	0	1	765	1	0.765	0	0	0	1.32	4	2.5	50	0	8	1	3	0	0	0	0	1	0	1	0	0	0	0	0	0	0	0	0	0.0418949	0	0	0	0
20862	2	2	201	24264	80	0	0	0	0	1	13560	1	13.56	4	1	0	1.125	4	2.5	47	0	8	1	3	0	0	0	0	0	1	1	1	0	0	0	0	0	0	0	0	0.0418949	0	0	0	0
20863	2	2	201	24264	5040	0	0	0	0	1	8360	1	8.36	0	0	0	0.36	5	2.6	54	0	1	1	2	0	0	0	0	1	0	1	0	0	0	0	0	0	0	0	0	0.0418949	0	0	0	0
20864	2	2	201	24264	288	0	0	0	0	1	20780	1	20.78	0	0	0	1.8	5	2.6	35	0	6	1	2	0	0	0	0	0	1	1	1	0	0	0	0	0	1	0	1	0.0418949	0	0	0	0
20865	2	2	201	24264	288	0	0	0	0	1	27320	1	27.32	0	0	0	1.44	4	2.5	54	0	7	1	2	0	0	0	1	0	0	1	0	0	0	0	0	0	0	0	0	0.0418949	0	0	0	0
20866	2	2	201	24264	288	0	0	0	0	1	13200	1	13.2	4	1	0	1.52	6	3.1	73	0	7	1	3	0	0	0	0	1	0	1	0	0	0	0	0	0	0	0	0	0.0418949	0	0	0	0
20656	2	2	202	24216	1184.17	1	0	0	0	0	2790	1	2.79	5	1	0	0.28	4	2.5	52	0	8	1	2	1	0	0	0	1	0	1	0	0	0	0	0	0	0	0	0	0.076074	0	0	1	0
20657	2	2	202	24216	1184.17	1	0	0	0	0	4745	1	4.745	5	1	0	0.28	4	2.5	41	1	6	1	2	0	0	0	0	0	1	1	0	0	0	0	0	0	0	0	0	0.076074	0	0	1	0
20658	2	2	202	24216	1184.17	0	0	0	1	0	2650	1	2.65	0	0	0	0.32	3	1.8	60	1	1	1	2	1	0	0	0	1	0	1	0	0	0	0	0	0	0	0	0	0.076074	0	0	1	0
20659	2	2	202	24216	1184.17	1	0	0	0	0	9360	1	9.36	5	1	0	0.72	7	3.8	72	0	1	1	2	1	1	0	0	0	0	1	0	0	0	0	0	0	0	0	0	0.076074	0	0	1	0
20660	2	2	202	24216	1184.17	0	0	0	1	0	5544	1	5.544	0	0	0	0.47	5	3	53	0	7	1	2	1	0	0	0	1	0	1	0	0	0	0	0	0	1	0	0	0.076074	0	0	1	0
20661	2	2	202	24216	1184.17	1	0	0	0	0	3887	1	3.887	0	0	0	0.28	3	2	56	0	7	1	2	1	0	0	0	1	0	1	0	0	0	0	0	0	0	0	0	0.076074	0	0	1	0
20662	2	2	202	24216	1015	1	0	0	0	0	3594	1	3.594	0	0	0	1.012	7	3.8	50	0	12	1	3	0	0	0	0	1	0	1	0	0	0	0	0	0	0	0	0	0.076074	0	0	1	0
20663	2	2	202	24216	1015	0	0	0	0	1	7040	1	7.04	0	0	0	1.196	2	1.5	51	1	5	1	3	0	0	0	0	0	1	1	0	0	0	1	0	1	0	0	0	0.076074	0	0	1	0
20664	2	2	202	24217	3748.5	0	0	0	1	0	9968	1	9.968	0	0	0	0.84	5	3	52	0	7	1	2	0	0	0	1	0	0	1	0	0	0	0	0	0	1	0	1	0.076074	0	0	1	0
20665	2	2	202	24217	3748.5	0	0	0	1	0	2845	1	2.845	0	0	0	0.2	4	2.3	60	1	6	1	3	0	1	0	0	0	0	1	0	0	0	0	0	0	1	0	1	0.076074	0	0	1	0
20666	2	2	202	24217	3748.5	0	0	0	1	0	14280	1	14.28	0	0	0	0.8	4	2.3	50	0	1	1	2	0	0	0	0	1	0	1	0	0	0	0	0	0	0	0	1	0.076074	0	0	1	0
20667	2	2	202	24217	3748.5	0	0	0	1	0	2640	1	2.64	0	0	0	0.28	4	2.5	60	0	11	1	3	0	0	0	1	0	0	1	0	0	0	0	0	0	0	0	1	0.076074	0	0	1	0
20668	2	2	202	24217	357	0	0	0	1	0	17645	1	17.645	0	0	0	1.94	5	2.4	80	1	1	1	3	0	0	0	0	0	1	1	0	0	1	0	0	1	0	0	1	0.076074	0	0	1	0
20669	2	2	202	24217	357	0	0	0	1	0	20562	1	20.562	0	0	0	1.125	9	4.2	58	0	7	1	2	1	0	0	0	1	0	1	0	0	1	0	0	0	1	0	0	0.076074	0	0	1	0
20670	2	2	202	24217	357	0	0	0	1	0	9909	1	9.909	0	0	0	1.982	10	4.9	63	0	8	1	3	0	0	0	0	1	0	1	0	0	1	0	0	1	0	0	0	0.076074	0	0	1	0
20671	2	2	202	24217	357	0	0	0	1	0	21460	1	21.46	0	0	0	4.802	6	2.9	62	1	6	1	2	0	1	0	0	0	0	1	0	0	1	0	0	1	1	0	0	0.076074	0	0	1	0
20672	2	2	202	24218	6669	0	0	0	1	0	6890	1	6.89	0	0	0	0.18	4	2.3	69	1	1	1	2	0	0	0	0	1	0	1	0	0	0	0	1	0	0	0	0	0.076074	0	0	1	0
20673	2	2	202	24218	6669	0	0	0	1	0	11653	1	11.653	0	0	0	0.32	2	1.5	40	1	6	1	2	0	0	0	1	0	0	1	0	0	0	0	1	0	0	0	0	0.076074	0	0	1	0
20674	2	2	202	24218	234	0	0	0	1	0	20273	1	20.273	0	0	0	1.072	6	2.9	70	1	1	1	2	0	0	0	0	1	0	1	0	0	0	0	0	1	0	0	0	0.076074	0	0	1	0
20675	2	2	202	24218	234	0	0	0	0	1	11513	1	11.513	0	0	0	0.55	4	2.5	60	0	8	1	3	0	0	0	0	1	0	1	0	0	0	0	1	1	1	0	0	0.076074	0	0	1	0
20676	2	2	202	24218	234	0	0	0	0	1	9485	1	9.485	0	0	0	1.082	4	2.5	47	0	8	1	2	1	0	1	0	0	0	1	0	0	0	0	1	0	1	0	1	0.076074	0	0	1	0
20677	2	2	202	24218	234	0	0	0	0	1	31980	1	31.98	11	1	0	1.445	7	3.8	57	1	8	1	3	0	0	0	0	1	0	1	0	0	0	0	0	0	0	0	0	0.076074	0	0	1	0
20678	2	2	202	24218	234	0	1	0	0	0	2815	1	2.815	0	0	0	0.632	6	3.1	72	0	1	1	2	1	0	0	1	0	0	1	1	0	0	0	1	1	0	0	0	0.076074	0	0	1	0
20679	2	2	202	24218	234	0	0	0	1	0	16453	1	16.453	0	0	0	0.69	6	3.5	42	0	8	1	3	0	0	0	0	1	0	1	0	0	0	0	1	1	0	0	1	0.076074	0	0	1	0
20768	2	2	202	24251	2817.5	0	0	0	1	0	3805	1	3.805	0	0	0	0.24	8	3.9	72	0	8	1	3	0	0	0	0	0	1	1	0	0	0	0	0	1	0	0	0	0.076074	0	0	1	0
20769	2	2	202	24251	57.5	0	0	0	1	0	1950	1	1.95	0	0	0	0	3	2	65	0	8	1	2	1	0	0	0	1	0	1	0	0	0	0	0	1	0	0	0	0.076074	0	0	1	0
20770	2	2	202	24251	57.5	0	0	0	1	0	34330	1	34.33	0	0	0	0.19	5	2.8	54	1	6	1	2	0	0	0	0	1	0	1	0	0	0	0	0	0	1	0	0	0.076074	0	0	1	0
20771	2	2	202	24251	7647.5	0	0	0	1	0	8400	1	8.4	0	0	0	0.4	2	1.5	56	0	8	1	2	1	1	0	0	0	0	1	0	0	0	0	0	0	0	0	1	0.076074	0	0	1	0
20772	2	2	202	24251	503.13	0	0	0	0	1	62900	1	62.9	0	0	0	0.72	10	4.5	65	0	8	1	3	0	0	0	0	0	1	1	0	0	0	0	0	0	1	0	1	0.076074	0	0	1	0
20773	2	2	202	24251	503.13	0	0	0	1	0	6035	1	6.035	0	0	0	1.24	3	2	70	1	6	1	3	0	0	0	0	1	0	1	0	0	0	0	0	0	0	0	0	0.076074	0	0	1	0
20774	2	2	202	24251	503.13	0	0	0	0	1	54085	1	54.085	0	0	0	0.71	7	3.6	65	0	1	1	1	0	0	0	1	0	0	1	0	0	0	0	0	0	1	0	1	0.076074	0	0	1	0
20775	2	2	202	24251	503.13	0	0	0	0	1	28605	1	28.605	0	0	0	1.06	5	2.6	65	1	5	1	2	0	0	0	1	0	0	1	0	0	0	0	0	1	1	0	1	0.076074	0	0	1	0
20776	2	2	202	24252	749	0	0	0	1	0	8481	1	8.481	0	0	0	0.12	2	1.5	55	0	7	1	3	0	0	0	0	0	1	1	0	0	0	0	0	0	0	0	0	0.076074	0	0	1	0
20777	2	2	202	24252	749	0	0	0	0	1	3130	1	3.13	0	0	0	0.16	2	1.5	38	0	6	1	2	0	0	0	0	1	0	1	0	0	0	0	0	0	0	0	0	0.076074	0	0	1	0
20778	2	2	202	24252	749	0	0	0	1	0	18730	1	18.73	0	0	0	0.64	9	4.2	56	0	8	1	3	0	0	0	0	1	0	1	0	0	0	0	0	0	0	0	0	0.076074	0	0	1	0
20779	2	2	202	24252	749	0	0	0	1	0	3580	1	3.58	0	0	0	0.145	3	2	62	0	8	1	2	1	0	0	0	1	0	1	0	0	0	0	0	0	0	0	0	0.076074	0	0	1	0
20780	2	2	202	24252	1926	0	0	0	1	0	838	1	0.838	0	0	0	0.06	4	2.1	40	0	10	1	3	0	1	0	0	0	0	1	0	0	0	0	0	0	0	0	0	0.076074	0	0	1	0
20781	2	2	202	24252	1926	0	0	0	1	0	17320	1	17.32	0	0	0	0.4	11	5.2	70	0	6	1	3	0	0	0	0	1	0	1	0	0	0	0	0	0	0	0	0	0.076074	0	0	1	0
20782	2	2	202	24252	1926	0	0	0	1	0	2505	1	2.505	0	0	0	0.105	4	2.5	45	0	8	1	3	0	0	0	0	1	0	1	0	0	0	0	0	0	0	0	0	0.076074	0	0	1	0
20783	2	2	202	24252	1926	0	0	0	1	0	9921	1	9.921	0	0	0	0.18	2	1.5	60	0	7	1	2	1	0	0	0	1	0	1	0	0	0	0	0	0	0	0	0	0.076074	0	0	1	0
20792	2	2	202	24254	8150	0	0	0	1	0	7730	1	7.73	0	0	0	0.18	6	3.1	70	0	5	1	3	0	0	0	0	1	0	1	0	0	0	0	0	0	0	0	0	0.076074	0	0	1	0
20793	2	2	202	24254	8150	0	0	0	0	1	4220	1	4.22	0	0	0	0.12	3	1.8	70	1	1	1	2	0	1	0	0	0	0	1	0	0	0	0	0	0	0	0	0	0.076074	0	0	1	0
20794	2	2	202	24254	489	0	0	0	0	1	22080	1	22.08	0	0	1	0.84	5	2.8	55	0	1	1	3	0	0	1	0	0	0	1	0	0	0	0	0	0	0	0	1	0.076074	0	0	1	0
20795	2	2	202	24254	489	0	0	0	1	0	19070	1	19.07	0	0	0	0.84	3	2	46	0	7	1	3	0	0	0	0	1	0	1	0	0	0	0	0	0	0	0	0	0.076074	0	0	1	0
20796	2	2	202	24254	489	0	0	0	0	1	82620	1	82.62	5	1	0	1.095	8	4.1	64	0	8	1	3	0	1	0	0	0	0	1	0	0	0	1	0	0	0	0	1	0.076074	0	0	1	0
20797	2	2	202	24254	163	0	0	0	0	1	260035	1	260.035	0	0	0	3.23	5	3	42	0	6	1	3	0	0	0	0	1	0	1	0	0	0	0	0	1	1	0	1	0.076074	0	0	1	0
20798	2	2	202	24254	163	0	0	0	0	1	141760	1	141.76	10	1	0	5.78	5	2.6	43	0	10	1	2	0	1	0	0	0	0	1	0	0	0	1	0	0	1	0	1	0.076074	0	0	1	0
20799	2	2	202	24254	163	0	0	0	0	1	143232	1	143.232	10	1	0	5.97	3	2	55	0	6	1	3	0	1	0	0	0	0	1	0	0	0	1	0	0	1	0	1	0.076074	0	0	1	0
20835	2	2	202	24260	5705	0	0	0	1	0	4339	1	4.339	0	0	0	0.208	10	4.7	57	0	5	1	2	1	0	0	0	1	0	1	0	0	1	0	0	0	0	0	0	0.076074	0	0	1	0
20836	2	2	202	24260	5705	0	0	0	1	0	1055	1	1.055	0	0	0	0.088	2	1.5	70	0	6	1	2	1	0	0	0	1	0	1	0	0	0	0	0	1	0	0	0	0.076074	0	0	1	0
20837	2	2	202	24260	815	0	0	0	0	1	45210	1	45.21	0	0	0	1.96	6	3.3	44	0	8	1	3	0	1	0	0	0	0	1	0	0	0	0	1	1	0	0	1	0.076074	0	0	1	0
20838	2	2	202	24260	815	0	0	0	0	1	1599	1	1.599	0	0	0	1.02	5	2.8	57	0	8	1	2	0	1	0	0	0	0	1	0	0	0	0	1	0	0	0	0	0.076074	0	0	1	0
20839	2	2	202	24260	244.5	0	0	0	0	1	1022	1	1.022	0	0	0	3.364	4	2.3	77	1	1	1	3	1	1	0	0	0	0	1	0	0	0	0	0	0	0	0	0	0.076074	0	0	1	0
20840	2	2	202	24260	244.5	0	0	0	0	1	4200	1	4.2	0	0	0	4.24	2	1.5	42	1	7	1	2	0	0	0	0	1	0	1	0	0	0	0	1	1	0	0	1	0.076074	0	0	1	0
20841	2	2	202	24260	244.5	0	0	0	1	0	1495	1	1.495	0	0	0	3.302	3	2	44	0	7	1	2	0	0	0	0	1	0	1	0	0	1	0	0	1	0	0	0	0.076074	0	0	1	0
20842	2	2	202	24260	244.5	0	0	0	0	1	-1660	1	-1.66	0	0	0	3.364	4	2.3	52	0	8	1	3	0	1	0	0	0	0	1	0	0	0	0	1	0	0	0	1	0.076074	0	0	1	0
20843	2	2	202	24261	2975	0	0	0	0	1	2720	1	2.72	0	0	0	0.62	3	2	60	0	8	1	3	0	0	0	0	0	1	1	0	0	0	0	0	0	0	0	0	0.076074	0	0	1	0
20844	2	2	202	24261	2975	1	0	0	0	0	5065	1	5.065	0	0	0	0.455	3	2	63	0	7	1	3	1	0	0	0	0	1	1	0	0	0	0	0	0	0	0	1	0.076074	0	0	1	0
20845	2	2	202	24261	2975	0	0	0	0	1	5280	1	5.28	0	0	0	0.085	3	1.8	37	1	7	1	3	0	0	0	0	0	1	1	0	0	0	0	0	0	0	0	0	0.076074	0	0	1	0
20846	2	2	202	24261	2975	0	0	0	0	1	1970	1	1.97	0	0	0	0.08	2	1.5	47	1	8	1	3	0	0	0	0	0	1	1	0	0	0	0	0	0	0	0	0	0.076074	0	0	1	0
20847	2	2	202	24261	2975	0	0	0	1	0	4255	1	4.255	0	0	0	0.4	3	2	40	1	6	1	3	0	0	0	0	0	1	1	0	0	0	0	0	0	0	0	1	0.076074	0	0	1	0
20848	2	2	202	24261	2975	1	0	0	0	0	2275	1	2.275	0	0	0	0.24	3	2	68	0	6	1	3	0	0	0	0	0	1	1	0	0	0	0	0	0	0	0	0	0.076074	0	0	1	0
20849	2	2	202	24261	357	0	0	0	0	1	12445	1	12.445	0	0	0	1.205	5	2.6	58	1	10	1	3	0	0	0	0	1	0	1	1	0	0	0	0	0	1	0	0	0.076074	0	0	1	0
20850	2	2	202	24261	357	0	0	0	0	1	6537	1	6.537	4	1	0	1.665	5	2.6	55	1	6	1	3	0	0	0	0	0	1	1	0	0	0	0	0	0	0	0	0	0.076074	0	0	1	0
20851	2	2	202	24263	575	1	0	0	0	0	19440	1	19.44	0	0	0	0.408	7	3.4	78	1	1	1	3	1	0	0	0	1	0	1	0	0	0	1	0	0	0	0	0	0.076074	0	0	1	0
20852	2	2	202	24263	287.5	0	0	0	0	1	24960	1	24.96	0	0	0	1.29	4	2.3	45	0	10	1	3	0	0	0	0	1	0	1	0	0	0	1	0	0	1	0	0	0.076074	0	0	1	0
20853	2	2	202	24263	100.63	0	0	0	0	1	67910	1	67.91	0	0	0	3.18	6	3.3	58	0	8	1	3	0	1	0	0	0	0	1	0	0	0	1	0	0	0	0	1	0.076074	0	0	1	0
20854	2	2	202	24263	100.63	0	0	0	0	1	79050	1	79.05	0	0	0	3.01	5	3	62	0	12	1	3	0	0	0	0	1	0	1	0	0	0	1	0	0	0	0	1	0.076074	0	0	1	0
20855	2	2	202	24263	100.63	0	0	0	0	1	102540	1	102.54	0	0	0	3.008	7	3.6	66	0	8	1	3	0	1	0	0	0	0	1	0	0	0	1	0	0	1	0	1	0.076074	0	0	1	0
20856	2	2	202	24263	100.63	0	0	0	0	1	98241	1	98.241	0	0	0	3.12	5	3	86	0	8	1	3	0	0	0	0	1	0	1	0	0	0	1	0	0	1	0	1	0.076074	0	0	1	0
20857	2	2	202	24263	9257.5	0	0	0	1	0	6120	1	6.12	0	0	0	0.118	8	4.3	52	0	8	1	3	0	0	0	0	1	0	0	0	0	0	1	0	0	1	0	1	0.076074	0	0	1	0
20858	2	2	202	24263	2415	1	0	0	0	0	36595	1	36.595	0	0	0	1.6	4	2.1	43	0	10	1	3	0	1	0	0	0	0	1	0	0	0	1	0	0	1	0	1	0.076074	0	0	1	0
20867	2	2	202	24265	1287	0	1	0	0	0	15472	1	15.472	6	1	0	0.3	7	3.4	75	0	1	1	3	0	0	0	0	1	0	1	0	0	0	0	1	0	1	0	0	0.076074	0	0	1	0
20868	2	2	202	24265	1287	0	1	0	0	0	9391	1	9.391	0	0	0	0.441	4	2.3	62	1	1	1	3	1	0	0	0	1	0	1	0	0	0	0	0	0	0	0	0	0.076074	0	0	1	0
20869	2	2	202	24265	1287	0	1	0	0	0	13656	1	13.656	5	1	0	0.39	5	3	56	0	1	1	3	0	0	0	0	1	0	1	0	0	0	0	1	0	1	0	0	0.076074	0	0	1	0
20870	2	2	202	24265	1287	1	0	0	0	0	5130	1	5.13	0	0	0	0.162	6	3.1	60	1	1	1	3	0	0	0	0	0	1	1	0	0	0	0	1	0	0	0	0	0.076074	0	0	1	0
20871	2	2	202	24265	1287	1	0	0	0	0	5795	1	5.795	0	0	0	0.12	8	3.9	62	0	8	1	3	0	0	0	0	1	0	1	0	0	0	0	0	0	0	0	0	0.076074	0	0	1	0
20872	2	2	202	24265	1287	0	1	0	0	0	14235	1	14.235	0	0	0	0.341	2	1.3	42	1	1	1	2	1	0	0	0	0	1	1	0	0	0	0	1	0	0	0	0	0.076074	0	0	1	0
20873	2	2	202	24265	1287	0	1	0	0	0	19366	1	19.366	5	1	0	0.532	9	4.4	53	1	1	1	3	0	0	0	0	1	0	1	0	0	0	0	1	0	1	0	0	0.076074	0	0	1	0
20874	2	2	202	24265	1287	0	1	0	0	0	10760	1	10.76	0	0	0	0.48	5	3	58	0	1	1	3	0	0	0	0	1	0	1	0	0	0	0	1	0	1	0	0	0.076074	0	0	1	0
20891	2	2	202	24269	214	0	1	0	0	0	3283	1	3.283	0	0	0	0.09	3	1.8	31	0	5	1	3	1	0	0	0	1	0	1	0	0	0	0	0	0	0	0	0	0.076074	0	0	1	0
20892	2	2	202	24269	214	0	1	0	0	0	12285	1	12.285	0	0	0	0.255	4	2.1	40	0	13	1	3	0	0	0	0	1	0	1	0	0	0	0	0	0	0	0	0	0.076074	0	0	1	0
20893	2	2	202	24269	214	0	0	0	0	1	7165	1	7.165	0	0	0	0.24	2	1.5	42	1	8	0	3	0	0	0	0	0	1	1	0	0	0	0	0	0	0	0	0	0.076074	0	0	1	0
20894	2	2	202	24269	214	0	1	0	0	0	8720	1	8.72	0	0	0	0.168	6	3.1	75	0	1	1	3	1	0	0	0	1	0	1	0	0	0	0	0	0	0	0	0	0.076074	0	0	1	0
20895	2	2	202	24269	1498	0	0	0	1	0	12220	1	12.22	0	0	0	0.24	5	3	56	0	7	1	3	0	0	0	0	1	0	1	0	0	0	0	0	0	0	0	0	0.076074	0	0	1	0
20896	2	2	202	24269	1498	0	0	0	1	0	7490	1	7.49	0	0	0	0.16	5	3	45	0	8	1	3	0	0	1	0	0	0	1	0	0	0	0	0	0	0	0	0	0.076074	0	0	1	0
20897	2	2	202	24269	1498	0	0	0	1	0	8330	1	8.33	0	0	0	0.16	3	2	51	1	8	1	3	0	0	0	0	1	0	1	0	0	0	0	0	0	0	0	0	0.076074	0	0	1	0
20898	2	2	202	24269	1498	0	0	0	1	0	18120	1	18.12	0	0	0	0.52	5	3	70	1	1	1	3	0	0	0	0	1	0	1	0	0	0	0	0	0	0	0	0	0.076074	0	0	1	0
20800	2	2	203	24255	260.5	0	1	0	0	0	24700	1	24.7	0	0	0	0.016	3	1.8	50	0	1	0	2	1	0	0	0	0	0	1	0	0	0	0	1	1	1	0	1	0	0	1	0	0
20801	2	2	203	24255	260.5	0	1	0	0	0	30650	1	30.65	0	0	0	0.64	4	2.3	80	0	1	1	2	0	0	0	0	0	0	1	0	0	0	0	1	1	1	0	1	0	0	1	0	0
20802	2	2	203	24255	260.5	0	1	0	0	0	68950	1	68.95	0	0	0	1.28	3	2	52	0	1	1	2	0	0	0	0	0	0	1	0	0	0	0	1	1	1	0	1	0	0	1	0	0
20760	2	2	204	24250	2550	1	0	0	0	0	4500	1	4.5	0	0	0	0.668	6	3.5	45	0	8	1	3	0	0	0	1	0	0	1	1	0	0	0	0	0	0	0	0	0.10659	1	0	1	0
20761	2	2	204	24250	50	0	0	0	0	1	18650	1	18.65	0	0	0	1.068	7	3.6	70	0	5	1	3	0	1	0	0	0	0	1	1	0	0	0	0	1	0	0	0	0.10659	1	0	1	0
20762	2	2	204	24250	50	1	0	0	0	0	30400	1	30.4	0	0	0	1.12	10	5.1	46	0	8	1	3	1	1	0	0	0	0	1	1	0	0	0	0	1	0	0	0	0.10659	1	0	1	0
20763	2	2	204	24250	50	1	0	0	0	0	25000	1	25	0	0	0	1.12	7	3.8	45	0	6	1	3	0	1	0	0	0	0	1	1	0	0	0	0	1	0	0	0	0.10659	1	0	1	0
20764	2	2	204	24250	50	0	0	0	0	1	19200	1	19.2	0	0	0	2.16	6	3.5	45	0	8	1	3	0	1	0	0	0	0	1	1	0	0	0	0	0	0	0	0	0.10659	1	0	1	0
20765	2	2	204	24250	5200	1	0	0	0	0	1425	1	1.425	0	0	0	0.16	6	3.3	60	0	1	1	3	0	1	0	0	0	0	1	0	0	0	0	0	1	0	0	0	0.10659	1	0	1	0
20766	2	2	204	24250	100	0	0	0	0	1	18450	1	18.45	0	0	0	1.43	12	5.9	40	0	6	1	3	1	1	0	0	0	0	1	1	0	0	0	0	1	0	0	0	0.10659	1	0	1	0
20767	2	2	204	24250	100	0	0	0	0	1	20800	1	20.8	0	0	0	1.133	10	4.9	34	0	8	1	3	0	0	0	1	0	0	1	1	0	0	0	0	1	0	0	0	0.10659	1	0	1	0
20784	2	2	204	24253	756	0	0	0	0	1	30600	1	30.6	0	0	0	0.56	8	4.3	85	0	1	1	3	0	1	0	0	0	0	1	0	0	1	0	1	1	0	0	0	0.10659	1	0	1	0
20785	2	2	204	24253	12	0	0	0	0	1	139300	1	139.3	0	0	0	1.898	11	5.6	66	0	6	1	3	0	1	0	0	0	0	1	0	0	1	0	1	1	0	0	0	0.10659	1	0	1	0
20786	2	2	204	24253	12	0	0	0	0	1	17225	1	17.225	0	0	0	1.328	6	3.1	60	0	6	1	3	0	1	0	0	0	0	1	0	0	1	0	1	1	0	0	0	0.10659	1	0	1	0
20787	2	2	204	24253	12	0	0	0	0	1	178390	1	178.39	0	0	0	2.022	7	3.6	45	0	7	1	3	0	1	0	0	0	0	1	0	0	1	0	1	1	0	0	0	0.10659	1	0	1	0
20788	2	2	204	24253	12	0	0	0	0	1	13580	1	13.58	0	0	0	2.132	4	2.5	50	0	6	1	3	1	1	0	0	0	0	1	0	0	1	0	1	1	0	0	0	0.10659	1	0	1	0
20789	2	2	204	24253	12	0	0	0	0	1	incomplete data	0				0	1.372	3	2	48	0	6	1	3	0	0	1	0	0	0	1	0	0	1	0	1	1	0	0	0	0.10659	0	1	0	1
20790	2	2	204	24253	12672	0	0	0	0	1	10050	1	10.05	0	0	0	0.32	5	2.4	36	0	6	1	3	0	1	0	0	0	0	1	0	0	1	0	1	1	0	0	0	0.10659	1	0	1	0
20791	2	2	204	24253	192	0	0	0	0	1	79120	1	79.12	0	0	0	1.386	6	3.3	80	0	1	1	3	0	1	0	0	0	0	1	0	0	1	0	1	1	0	0	0	0.10659	1	0	1	0
20827	2	2	204	24259	282	0	0	0	0	1	95900	1	95.9	0	0	0	0.168	4	2.1	36	0	10	1	3	0	1	0	0	0	0	0	0	0	0	0	0	1	0	0	0	0.10659	1	0	1	0
20828	2	2	204	24259	282	0	0	0	0	1	374650	1	374.65	0	0	0	0.568	9	4.6	55	0	1	1	3	0	1	0	0	0	0	1	0	0	1	0	0	1	0	0	0	0.10659	1	0	1	0
20829	2	2	204	24259	282	0	0	0	0	1	344300	1	344.3	0	0	0	0.44	3	2	43	0	10	1	3	0	0	0	0	1	0	0	0	0	1	0	0	1	0	0	0	0.10659	1	0	1	0
20830	2	2	204	24259	282	0	0	0	0	1	27750	1	27.75	0	0	0	0.4	2	1.5	70	1	1	1	3	0	1	0	0	0	0	1	0	0	0	0	0	1	0	0	0	0.10659	1	0	1	0
20831	2	2	204	24259	423	0	1	0	0	0	600	1	0.6	0	0	0	0.672	5	3	62	0	5	1	3	0	0	0	1	0	0	1	0	0	0	0	0	1	0	0	0	0.10659	1	0	1	0
20832	2	2	204	24259	423	0	0	0	1	0	-11050	1	-11.05	0	0	0	0.18	4	2.5	40	0	7	1	3	0	0	0	0	0	0	0	0	0	0	1	0	0	0	0	0	0.10659	1	0	1	0
20833	2	2	204	24259	423	0	0	0	0	1	1000	1	1	0	0	0	0.192	3	2	52	0	13	1	3	0	0	0	0	1	0	0	0	0	0	1	0	0	0	0	0	0.10659	1	0	1	0
20834	2	2	204	24259	423	0	0	0	0	1	incomplete data	0				0	0.008	4	2.5	54	1	1	1	3	0	0	1	0	0	0	0	0	0	0	1	0	0	0	0	0	0.10659	0	1	0	1
20875	2	2	204	24267	1016.67	1	0	0	0	0	6300	1	6.3	0	0	0	0.128	2	1.5	65	1	1	1	3	0	0	0	0	1	0	1	1	0	0	0	0	1	0	0	0	0.10659	1	0	1	0
20876	2	2	204	24267	1016.67	1	0	0	0	0	4150	1	4.15	10	1	0	0.248	2	1.5	65	0	1	1	3	0	1	0	0	0	0	1	1	0	0	0	0	1	0	0	0	0.10659	1	0	1	0
20877	2	2	204	24267	1016.67	0	0	0	0	1	7250	1	7.25	0	0	0	0.7	8	4.1	57	0	8	1	3	0	0	0	0	1	0	1	1	0	0	0	1	1	0	0	0	0.10659	1	0	1	0
20878	2	2	204	24267	50	0	0	0	0	1	20800	1	20.8	0	0	0	1.228	7	3.6	45	0	6	1	3	0	1	0	0	0	0	1	1	0	0	0	0	1	0	0	1	0.10659	1	0	1	0
20879	2	2	204	24267	2500	0	0	0	1	0	8770	1	8.77	0	0	0	0.96	5	2.8	60	0	1	1	3	0	1	0	0	0	0	1	1	0	0	0	0	1	0	0	0	0.10659	1	0	1	0
20880	2	2	204	24267	2500	1	0	0	0	0	17490	1	17.49	0	0	0	0.48	8	4.3	70	0	1	1	3	0	0	0	0	1	0	1	1	0	0	0	1	1	0	0	0	0.10659	1	0	1	0
20881	2	2	204	24267	2500	1	0	0	0	0	3030	1	3.03	0	0	0	0.16	7	3.4	45	0	1	1	3	0	0	0	1	0	0	1	1	0	0	0	1	0	0	0	0	0.10659	1	0	1	0
20882	2	2	204	24267	150	1	0	0	0	0	32080	1	32.08	10	1	0	1.208	6	3.1	64	0	1	1	3	0	1	0	0	0	0	1	1	0	0	0	0	1	0	0	1	0.10659	1	0	1	0
20883	2	2	204	24268	1057.5	0	0	0	0	1	6350	1	6.35	0	0	0	0.24	6	3.3	52	0	7	1	3	1	1	0	0	0	0	1	1	0	0	0	0	0	0	0	0	0.10659	1	0	1	0
20884	2	2	204	24268	58.75	0	0	0	0	1	29470	1	29.47	0	0	0	1.18	3	2	70	1	1	1	3	0	1	0	0	0	0	1	1	0	0	0	0	0	0	0	1	0.10659	1	0	1	0
20885	2	2	204	24268	58.75	0	0	0	0	1	35040	1	35.04	0	0	0	1.04	2	1.5	65	0	1	1	3	0	1	0	0	0	0	1	1	0	0	0	0	0	0	0	0	0.10659	1	0	1	0
20886	2	2	204	24268	23.5	0	0	0	0	1	77200	1	77.2	0	0	0	2.88	6	3.5	50	0	1	1	3	0	1	0	0	0	0	1	0	0	0	1	1	1	0	0	1	0.10659	1	0	1	0
20887	2	2	204	24268	23.5	0	0	0	0	1	9650	1	9.65	0	0	0	3.212	4	2.5	68	0	8	1	3	0	1	0	0	0	0	1	0	0	0	0	1	0	0	0	0	0.10659	1	0	1	0
20888	2	2	204	24268	7332	0	0	0	0	1	4900	1	4.9	0	0	0	0.16	6	3.3	47	0	10	1	3	0	0	0	0	1	0	1	0	0	0	0	0	0	0	0	0	0.10659	1	0	1	0
20889	2	2	204	24268	188	0	0	0	0	1	11900	1	11.9	0	0	0	1.388	2	1.5	59	0	6	1	2	0	1	0	0	0	0	1	0	0	0	0	1	0	0	0	1	0.10659	1	0	1	0
20890	2	2	204	24268	188	0	0	0	0	1	16100	1	16.1	20	1	0	7.022	3	2	62	0	13	1	3	0	1	0	0	0	0	1	0	0	0	0	1	1	0	0	1	0.10659	1	0	1	0
20931	2	2	204	24274	432	0	0	0	0	1	2050	1	2.05	0	0	0	0.16	4	2.5	71	0	7	1	3	0	0	0	0	1	0	1	0	0	1	1	0	1	0	0	0	0.10659	1	0	1	0
20932	2	2	204	24274	30	0	0	0	0	1	48000	1	48	0	0	0	1.6	4	2.5	82	0	8	1	3	0	1	0	0	0	0	1	0	0	1	1	0	1	0	0	0	0.10659	1	0	1	0
20933	2	2	204	24274	30	0	0	0	0	1	incomplete data	0				0	1.204	2	1.5	80	0	6	1	3	0	0	0	0	0	1	1	0	0	1	1	0	1	0	0	0	0.10659	0	1	0	1
20934	2	2	204	24274	12	0	0	0	0	1	186790	1	186.79	8	1	0	2.16	7	3.6	70	0	8	1	3	0	1	0	0	0	0	0	0	0	0	1	0	0	0	0	0	0.10659	1	0	1	0
20935	2	2	204	24274	12	0	0	0	0	1	325700	1	325.7	0	0	0	2.4	5	2.8	52	1	7	1	3	0	1	0	0	0	0	0	0	0	0	1	0	0	0	0	0	0.10659	1	0	1	0
20936	2	2	204	24274	12	0	0	0	0	1	496600	1	496.6	0	0	0	3.2	5	2.8	71	1	13	1	3	0	1	0	0	0	0	0	0	0	0	1	0	0	0	0	0	0.10659	1	0	1	0
20937	2	2	204	24274	12	0	0	0	0	1	459668	1	459.668	0	0	0	2.944	2	1.5	76	0	8	1	3	0	1	0	0	0	0	0	0	0	0	1	0	0	0	0	0	0.10659	1	0	1	0
20938	2	2	204	24274	2304	0	1	0	0	0	3100	1	3.1	0	0	0	0.148	6	3.5	87	0	1	1	3	0	1	0	0	0	0	0	0	0	0	1	0	0	0	0	0	0.10659	1	0	1	0
20574	2	2	205	24201	55	0	0	0	0	1	4795	1	4.795	0	0	0	0.48	5	3	52	0	10	1	3	0	0	0	0	1	0	1	0	0	0	0	0	1	0	0	0	0.0760342	1	0	1	0
20575	2	2	205	24201	55	0	0	0	0	1	545	0		0	0	0	0.02	3	2	42	1	8	1	3	0	0	0	0	1	0	0	0	0	0	0	0	0	0	0	0	0.0760342	0	1	0	1
20576	2	2	205	24201	55	0	0	0	0	1	2860	1	2.86	0	0	0	0.24	7	3.8	74	0	8	1	3	0	0	0	1	0	0	0	0	0	0	1	0	1	0	0	0	0.0760342	1	0	1	0
20577	2	2	205	24201	7058.34	0	0	0	0	1	15600	1	15.6	0	0	0	0.1	11	5.2	58	1	7	1	3	0	0	0	0	1	0	0	0	0	0	1	0	0	0	0	0	0.0760342	1	0	1	0
20578	2	2	205	24201	7058.34	0	0	0	0	1	2280	1	2.28	0	0	0	0.04	7	3.2	38	0	7	1	3	0	0	0	0	1	0	1	0	0	0	0	0	1	0	0	0	0.0760342	1	0	1	0
20579	2	2	205	24201	7058.34	1	0	0	0	0	1025	1	1.025	0	0	0	0.16	8	3.5	35	0	6	1	3	1	0	0	0	1	0	1	0	0	0	0	0	1	0	0	0	0.0760342	1	0	1	0
20580	2	2	205	24201	605	0	0	0	0	1	4820	1	4.82	0	0	0	1.14	1	1	59	1	1	1	3	0	0	0	0	1	0	1	0	0	1	0	0	1	0	0	0	0.0760342	1	0	1	0
20581	2	2	205	24201	605	0	0	0	0	1	14580	1	14.58	0	0	1	1.148	4	2.5	47	1	1	1	3	0	1	0	0	0	0	1	0	0	0	0	0	0	0	0	0	0.0760342	1	0	1	0
20582	2	2	205	24202	3007	0	0	0	0	1	24050	1	24.05	0	0	0	0.68	4	2.5	39	0	8	1	3	0	1	0	0	0	0	1	1	0	1	1	0	1	0	0	0	0.0760342	1	0	1	0
20583	2	2	205	24202	3007	1	0	0	0	0	4920	1	4.92	0	0	0	0.2	2	1.5	38	1	6	1	3	0	0	0	0	1	0	1	0	0	0	0	0	0	0	0	0	0.0760342	1	0	1	0
20584	2	2	205	24202	97	0	0	0	0	1	19100	1	19.1	0	0	0	1.019	6	3.3	60	1	6	1	2	1	1	0	0	0	0	1	0	0	0	0	0	1	0	0	0	0.0760342	1	0	1	0
20585	2	2	205	24202	97	0	0	0	0	1	6350	1	6.35	0	0	0	2.152	4	2.3	62	1	1	1	3	0	1	0	0	0	0	1	0	0	0	0	0	0	0	0	0	0.0760342	1	0	1	0
20586	2	2	205	24202	2279.5	0	0	0	0	1	14320	1	14.32	0	0	0	0.12	4	2.5	39	0	6	1	3	0	0	0	0	1	0	1	0	0	0	0	0	1	0	0	0	0.0760342	1	0	1	0
20587	2	2	205	24202	2279.5	1	0	0	0	0	7350	1	7.35	12	1	0	0.14	4	2.5	43	0	8	1	3	0	1	0	0	0	0	1	0	0	0	0	0	1	0	0	0	0.0760342	1	0	1	0
20588	2	2	205	24202	2279.5	0	0	0	0	1	1250	1	1.25	0	0	0	0.16	5	2.4	31	0	7	1	3	0	1	0	0	0	0	1	0	0	0	0	0	0	0	0	0	0.0760342	1	0	1	0
20589	2	2	205	24202	2279.5	1	0	0	0	0	3560	1	3.56	0	0	0	0.24	2	1.5	71	0	1	1	3	0	1	0	0	0	0	1	0	0	0	0	0	1	0	0	0	0.0760342	1	0	1	0
20598	2	2	205	24204	3068.8	1	0	0	0	0	16265	1	16.265	0	0	0	0.48	2	1.5	59	0	7	1	3	0	1	0	0	0	0	1	0	0	1	0	1	1	0	0	0	0.0760342	1	0	1	0
20599	2	2	205	24204	3068.8	1	0	0	0	0	2605	1	2.605	0	0	0	0.094	6	2.9	46	1	1	1	3	1	0	0	0	1	0	1	0	0	0	0	1	1	0	0	0	0.0760342	1	0	1	0
20600	2	2	205	24204	3068.8	1	0	0	0	0	4565	1	4.565	0	0	0	0.2	6	3.1	53	0	5	1	3	1	0	0	0	1	0	1	0	0	1	0	1	1	0	0	0	0.0760342	1	0	1	0
20601	2	2	205	24204	3068.8	1	0	0	0	0	4420	1	4.42	0	0	0	0.36	10	4.5	59	0	1	1	3	0	0	0	0	1	0	1	0	0	0	0	0	1	0	0	0	0.0760342	1	0	1	0
20602	2	2	205	24204	3068.8	0	0	0	0	1	11025	1	11.025	0	0	0	0.968	5	3	85	0	1	1	3	0	0	0	0	1	0	1	0	0	0	0	1	1	0	0	1	0.0760342	1	0	1	0
20603	2	2	205	24204	137	0	0	0	0	1	17770	1	17.77	0	0	0	1.54	2	1.5	69	0	8	1	3	0	1	0	0	0	0	1	0	0	1	0	1	1	0	0	0	0.0760342	1	0	1	0
20604	2	2	205	24204	137	0	0	0	0	1	29025	1	29.025	0	0	0	1.632	6	3.3	64	0	8	1	3	0	0	0	0	1	0	1	0	0	0	0	0	1	0	0	0	0.0760342	1	0	1	0
20605	2	2	205	24204	137	0	0	0	0	1	12730	1	12.73	0	0	0	1.288	2	1.5	66	0	13	1	3	0	1	0	0	0	0	1	0	0	0	0	0	1	0	0	0	0.0760342	1	0	1	0
20803	2	2	205	24256	7896.5	0	0	0	0	1	15450	1	15.45	0	0	0	0.34	6	3.1	35	0	7	1	3	1	1	0	0	0	0	1	1	0	1	0	0	0	0	0	0	0.0760342	1	0	1	0
20804	2	2	205	24256	7896.5	0	0	0	0	1	7710	1	7.71	0	0	0	0.196	2	1.5	65	0	1	1	3	0	1	0	0	0	0	1	0	0	1	0	1	1	0	0	0	0.0760342	1	0	1	0
20805	2	2	205	24256	1393.5	0	0	0	0	1	30665	1	30.665	0	0	0	1.44	4	2.5	40	0	5	1	3	0	1	0	0	0	0	1	1	0	0	0	1	1	0	0	0	0.0760342	1	0	1	0
20806	2	2	205	24256	1393.5	0	0	0	0	1	36020	1	36.02	0	0	0	1.6	1	1	52	0	1	1	3	0	1	0	0	0	0	1	1	0	1	0	0	1	0	0	0	0.0760342	1	0	1	0
20807	2	2	205	24256	1393.5	0	0	0	0	1	25610	1	25.61	0	0	0	1.728	4	2.1	31	0	8	1	3	0	1	0	0	0	0	1	1	0	1	0	0	0	0	0	0	0.0760342	1	0	1	0
20808	2	2	205	24256	1393.5	0	0	0	0	1	39170	1	39.17	0	0	0	1.126	6	2.9	35	0	1	1	3	0	1	0	0	0	0	1	1	0	1	0	1	1	0	0	0	0.0760342	1	0	1	0
20809	2	2	205	24256	929	0	0	0	0	1	71380	1	71.38	0	0	0	3.542	9	4.2	55	0	1	1	3	0	1	0	0	0	0	1	1	0	1	0	1	1	0	0	0	0.0760342	1	0	1	0
20810	2	2	205	24256	929	0	0	0	0	1	37945	1	37.945	0	0	0	3.056	3	1.8	70	0	1	1	3	0	1	0	0	0	0	1	1	0	1	0	0	1	0	0	0	0.0760342	1	0	1	0
20811	2	2	205	24257	3517.5	0	0	0	0	1	4960	1	4.96	0	0	0	0.24	4	2.3	75	1	1	1	3	0	1	0	0	0	0	1	0	0	0	0	0	0	0	0	0	0.0760342	1	0	1	0
20812	2	2	205	24257	3517.5	0	0	0	0	1	1040	1	1.04	0	0	0	0.56	2	1.5	82	0	5	1	3	0	1	0	0	0	0	1	0	0	0	0	0	0	0	0	0	0.0760342	1	0	1	0
20813	2	2	205	24257	3517.5	0	0	0	0	1	-1680	1	-1.68	0	0	0	0.16	1	1	56	0	6	1	3	0	1	0	0	0	0	1	0	0	0	0	0	0	0	0	0	0.0760342	1	0	1	0
20814	2	2	205	24257	3517.5	0	0	0	0	1	10650	1	10.65	0	0	0	0.64	6	3.1	68	0	7	1	3	0	0	0	0	1	0	1	0	0	0	0	0	0	0	0	0	0.0760342	1	0	1	0
20815	2	2	205	24257	3517.5	0	0	0	0	1	3060	1	3.06	0	0	0	0.4	5	2.6	34	0	13	1	3	0	0	0	0	1	0	1	0	0	0	0	0	0	0	0	0	0.0760342	1	0	1	0
20816	2	2	205	24257	262.5	0	0	0	0	1	7050	1	7.05	0	0	0	1.25	4	2.5	52	0	7	1	3	0	1	0	0	0	0	1	0	0	0	0	0	0	0	0	0	0.0760342	1	0	1	0
20817	2	2	205	24257	262.5	0	0	0	0	1	2350	1	2.35	0	0	0	1.097	3	2	60	0	8	1	3	0	1	0	0	0	0	1	0	0	0	0	0	0	0	0	0	0.0760342	1	0	1	0
20818	2	2	205	24257	262.5	0	0	0	0	1	11170	1	11.17	0	0	0	1.105	2	1.5	49	0	8	1	3	0	1	0	0	0	0	1	0	0	0	0	0	0	0	0	0	0.0760342	1	0	1	0
20819	2	2	205	24258	1831.15	0	0	0	0	1	8865	1	8.865	0	0	0	0.32	6	3.3	66	0	1	1	3	1	1	0	0	0	0	1	1	0	0	0	0	1	0	0	0	0.0760342	1	0	1	0
20820	2	2	205	24258	1831.15	0	0	0	0	1	19324	1	19.324	0	0	0	0.64	5	3	62	0	1	1	3	0	1	0	0	0	0	1	1	0	0	0	0	1	0	0	0	0.0760342	1	0	1	0
20821	2	2	205	24258	1831.15	0	0	0	0	1	4750	1	4.75	0	0	0	0.24	6	3.1	45	0	1	1	3	1	1	0	0	0	0	1	0	0	0	0	0	1	0	0	0	0.0760342	1	0	1	0
20822	2	2	205	24258	1831.15	1	0	0	0	0	6670	1	6.67	0	0	0	0.36	5	2.6	57	0	1	1	3	0	0	0	0	0	1	1	0	0	0	0	0	0	0	0	0	0.0760342	1	0	1	0
20823	2	2	205	24258	1831.15	1	0	0	0	0	260	1	0.26	0	0	0	0.08	4	2.3	25	0	7	1	3	0	0	0	0	1	0	1	0	0	0	0	0	0	0	0	0	0.0760342	1	0	1	0
20824	2	2	205	24258	1831.15	1	0	0	0	0	12480	1	12.48	0	0	0	0.4	4	2.5	45	0	6	1	3	0	1	0	0	0	0	1	0	0	0	0	0	0	0	0	0	0.0760342	1	0	1	0
20825	2	2	205	24258	1831.15	0	0	0	0	1	3590	1	3.59	0	0	0	0.16	5	2.6	31	0	7	1	3	0	0	0	0	1	0	1	0	0	0	0	0	0	0	0	0	0.0760342	1	0	1	0
20826	2	2	205	24258	188.5	1	0	0	0	0	13150	1	13.15	0	0	0	1.37	6	2.9	60	1	1	1	3	0	1	0	0	0	0	1	0	0	0	0	0	1	0	0	0	0.0760342	1	0	1	0
20899	2	2	205	24270	5411.5	0	0	0	0	1	23370	1	23.37	0	0	0	0.968	10	5.3	82	0	1	1	3	1	1	0	0	0	0	1	0	0	0	0	0	0	0	0	1	0.0760342	1	0	1	0
20900	2	2	205	24270	5411.5	0	0	0	0	1	9950	1	9.95	10	1	0	0.728	6	3.1	63	0	6	1	3	0	1	0	0	0	0	1	0	0	0	0	0	0	0	0	1	0.0760342	1	0	1	0
20901	2	2	205	24270	1438.5	0	0	0	0	1	10650	1	10.65	10	1	0	1.208	4	2.5	51	0	8	1	3	0	1	0	0	0	0	1	0	0	0	0	0	0	0	0	1	0.0760342	1	0	1	0
20902	2	2	205	24270	1438.5	0	0	0	0	1	41590	1	41.59	0	0	0	1.6	4	2.1	32	0	8	1	3	0	1	0	0	0	0	1	0	0	0	0	0	0	0	0	0	0.0760342	1	0	1	0
20903	2	2	205	24270	171.25	0	0	0	0	1	12200	1	12.2	0	0	0	2.08	10	4.7	63	0	1	1	3	0	0	0	1	0	0	1	0	0	0	0	0	0	1	0	0	0.0760342	1	0	1	0
20904	2	2	205	24270	171.25	0	0	0	0	1	25720	1	25.72	0	0	0	2.112	6	3.3	54	0	1	1	3	0	0	0	1	0	0	1	0	0	0	0	0	0	1	0	1	0.0760342	1	0	1	0
20905	2	2	205	24270	171.25	0	0	0	0	1	24250	1	24.25	0	0	0	2.36	5	3	62	1	1	1	3	0	0	0	1	0	0	1	0	0	0	1	0	0	0	0	1	0.0760342	1	0	1	0
20906	2	2	205	24270	171.25	0	0	0	0	1	21100	1	21.1	0	0	0	2.224	9	4.4	60	0	5	1	3	0	0	0	0	1	0	1	0	0	0	0	0	0	0	0	1	0.0760342	1	0	1	0
20907	2	2	205	24271	393.75	0	0	0	0	1	incomplete data	0				0	0	4	1.9	31	1	8	1	3	0	0	1	0	0	0	1	0	0	0	0	0	0	0	0	1	0.0760342	0	1	0	1
20908	2	2	205	24271	393.75	0	0	0	0	1	incomplete data	0				1	0	1	1	81	0	1	1	3	0	0	1	0	0	0	1	0	0	0	0	0	0	0	0	1	0.0760342	0	1	0	1
20909	2	2	205	24271	5775	0	0	0	0	1	1670	1	1.67	0	0	0	0.2	4	2.1	35	0	10	1	3	0	0	0	1	0	0	1	0	0	0	0	0	0	0	0	0	0.0760342	1	0	1	0
20910	2	2	205	24271	5775	0	0	0	0	1	11160	1	11.16	0	0	0	0.32	3	2	44	0	7	1	3	0	1	0	0	0	0	1	0	0	0	0	0	0	0	0	0	0.0760342	1	0	1	0
20911	2	2	205	24271	5775	1	0	0	0	0	2875	1	2.875	0	0	0	0.01	4	2.5	45	0	6	1	3	1	0	0	0	1	0	1	0	0	0	0	0	0	0	0	0	0.0760342	1	0	1	0
20912	2	2	205	24271	262.5	0	0	0	0	1	25650	1	25.65	0	0	0	1.075	5	3	48	0	8	1	3	0	0	0	0	1	0	1	0	0	0	0	0	0	0	0	0	0.0760342	1	0	1	0
20913	2	2	205	24271	262.5	0	0	0	0	1	15750	1	15.75	0	0	0	1.351	5	3	53	1	5	1	3	1	1	0	0	0	0	1	0	0	0	0	0	0	0	0	0	0.0760342	1	0	1	0
20914	2	2	205	24271	262.5	0	0	0	0	1	12350	1	12.35	0	0	0	1.454	5	2.8	55	0	7	1	3	0	0	0	0	1	0	1	0	0	0	0	0	0	0	0	0	0.0760342	1	0	1	0
20915	2	2	205	24272	5574	1	0	0	0	0	5800	1	5.8	0	0	0	0.3	4	2.1	35	0	6	1	3	0	1	0	0	0	0	1	1	0	0	0	0	0	0	0	0	0.0760342	1	0	1	0
20916	2	2	205	24272	5574	0	0	0	0	1	4650	1	4.65	0	0	0	0.4	3	1.8	33	0	8	1	3	0	1	0	0	0	0	1	0	0	0	1	0	0	0	0	0	0.0760342	1	0	1	0
20917	2	2	205	24272	5574	1	0	0	0	0	2200	1	2.2	0	0	0	0.12	4	2.1	36	0	10	1	3	0	0	0	0	1	0	1	1	0	0	0	0	0	0	0	0	0.0760342	1	0	1	0
20918	2	2	205	24272	5574	1	0	0	0	0	incomplete data	0				1	0.08	3	2	65	1	1	1	3	0	0	0	0	1	0	1	1	0	0	0	0	0	0	0	0	0.0760342	0	1	0	1
20919	2	2	205	24272	5574	1	0	0	0	0	-200	1	-0.2	0	0	0	0.16	2	1.5	57	0	1	1	3	0	1	0	0	0	0	1	0	0	0	0	0	0	0	0	0	0.0760342	1	0	1	0
20920	2	2	205	24272	5574	1	0	0	0	0	330	1	0.33	0	0	0	0.4	1	1	70	1	1	1	3	0	1	0	0	0	0	0	0	0	0	0	0	1	0	0	0	0.0760342	1	0	1	0
20921	2	2	205	24272	5574	1	0	0	0	0	5100	1	5.1	0	0	0	0.24	4	2.5	45	0	5	1	3	0	1	0	0	0	0	1	1	0	0	0	0	0	0	0	0	0.0760342	1	0	1	0
20922	2	2	205	24272	929	0	0	0	0	1	37850	1	37.85	0	0	0	1.371	12	5.7	36	0	6	1	3	0	1	0	0	0	0	1	1	0	0	0	0	0	0	0	0	0.0760342	1	0	1	0
20923	2	2	205	24273	898.34	0	0	0	0	1	15610	1	15.61	0	0	0	0.328	4	2.5	40	0	8	1	3	0	0	0	0	1	0	1	0	0	0	0	0	1	0	0	0	0.0760342	1	0	1	0
20924	2	2	205	24273	898.34	0	0	0	0	1	53200	1	53.2	0	0	0	0.28	7	3.8	79	0	1	1	3	0	1	0	0	0	0	1	0	0	1	0	0	1	0	0	0	0.0760342	1	0	1	0
20925	2	2	205	24273	898.34	0	0	0	0	1	35910	1	35.91	22	1	0	0.24	4	2.1	36	0	13	1	3	0	0	0	0	1	0	1	1	0	1	0	0	1	0	0	0	0.0760342	1	0	1	0
20926	2	2	205	24273	55	0	0	0	0	1	101000	1	101	20	1	0	1.896	6	3.1	80	0	5	1	3	0	1	0	0	0	0	1	0	0	1	0	0	1	0	0	0	0.0760342	1	0	1	0
20927	2	2	205	24273	2310	0	0	0	0	1	26850	1	26.85	0	0	0	0.72	4	2.3	38	0	6	1	3	1	1	0	0	0	0	1	0	0	1	0	0	1	0	0	0	0.0760342	1	0	1	0
20928	2	2	205	24273	2310	1	0	0	0	0	6110	1	6.11	0	0	0	0.12	6	3.3	35	0	6	1	3	0	0	0	0	1	0	0	0	0	1	0	0	1	0	0	0	0.0760342	1	0	1	0
20929	2	2	205	24273	2310	1	0	0	0	0	12580	1	12.58	0	0	0	0.2	7	3.4	63	0	1	1	3	0	0	0	1	0	0	1	0	0	0	0	0	1	0	0	0	0.0760342	1	0	1	0
20930	2	2	205	24273	165	0	0	0	0	1	73770	1	73.77	0	0	0	1.08	4	2.5	42	0	7	1	3	0	1	0	0	0	0	1	0	0	1	0	0	1	0	0	0	0.0760342	1	0	1	0
20939	2	2	205	24275	188.5	0	0	0	0	1	incomplete data	0				1	0.004	1	1	75	1	1	1	3	0	0	1	0	0	0	0	0	0	0	1	0	0	0	0	0	0.0760342	0	1	0	1
20940	2	2	205	24275	2073.5	1	0	0	0	0	3550	1	3.55	0	0	0	0.32	4	2.5	55	0	13	1	3	0	1	0	0	0	0	1	0	0	0	0	0	0	0	0	0	0.0760342	1	0	1	0
20941	2	2	205	24275	2073.5	1	0	0	0	0	990	1	0.99	0	0	0	0.036	7	3.4	58	0	5	1	3	1	0	0	0	1	0	1	0	0	0	0	0	0	0	0	0	0.0760342	1	0	1	0
20942	2	2	205	24275	2073.5	0	0	0	0	1	1030	1	1.03	0	0	0	0.09	3	2	80	0	5	1	3	0	1	0	0	0	0	1	0	0	1	0	0	1	0	0	0	0.0760342	1	0	1	0
20943	2	2	205	24275	2073.5	0	0	0	0	1	5780	1	5.78	0	0	0	0.64	4	2.1	54	1	1	1	3	0	1	0	0	0	0	1	0	0	1	0	0	1	0	0	0	0.0760342	1	0	1	0
20944	2	2	205	24275	2073.5	0	0	0	0	1	1460	1	1.46	0	0	0	0.16	4	2.1	34	0	7	1	3	1	1	0	0	0	0	1	0	0	0	0	0	0	0	0	0	0.0760342	1	0	1	0
20945	2	2	205	24275	2073.5	0	0	0	0	1	2370	1	2.37	0	0	0	0.32	3	1.8	26	0	13	1	3	1	1	0	0	0	0	1	0	0	0	0	0	0	0	0	0	0.0760342	1	0	1	0
20946	2	2	205	24275	2073.5	0	0	0	0	1	2100	1	2.1	0	0	0	0	4	2.1	35	1	8	1	3	0	1	0	0	0	0	1	0	0	0	0	0	0	0	0	0	0.0760342	1	0	1	0
20963	2	2	205	24279	5141	1	0	0	0	0	590	1	0.59	0	0	0	0.12	4	2.1	35	0	8	1	3	1	0	0	0	1	0	1	0	0	0	0	0	0	0	0	0	0.0760342	1	0	1	0
20964	2	2	205	24279	97	0	0	0	0	1	4000	1	4	0	0	0	1.256	5	2.8	73	0	8	1	3	0	1	0	0	0	0	1	0	0	0	0	0	1	0	0	0	0.0760342	1	0	1	0
20965	2	2	205	24279	97	0	0	0	0	1	16400	1	16.4	5	1	0	1.346	5	2.8	58	0	6	1	3	0	1	0	0	0	0	1	0	0	0	0	0	1	0	0	1	0.0760342	1	0	1	0
20966	2	2	205	24279	97	0	0	0	0	1	8250	1	8.25	0	0	0	1.2	2	1.5	64	0	10	1	3	0	1	0	0	0	0	1	0	0	0	0	0	0	0	0	0	0.0760342	1	0	1	0
20967	2	2	205	24279	97	0	0	0	0	1	18900	1	18.9	0	0	0	1.904	2	1.5	63	0	8	1	3	0	1	0	0	0	0	1	0	0	0	0	0	1	1	0	0	0.0760342	1	0	1	0
20968	2	2	205	24279	97	0	0	0	0	1	4680	1	4.68	0	0	0	2.22	3	2	60	0	13	1	3	0	1	0	0	0	0	1	0	0	0	0	0	1	0	0	0	0.0760342	1	0	1	0
20969	2	2	205	24279	5626	0	0	0	0	1	5250	1	5.25	0	0	0	0.64	7	3.6	62	0	8	1	3	0	1	0	0	0	0	1	0	0	0	0	0	0	0	0	1	0.0760342	1	0	1	0
20970	2	2	205	24279	5626	1	0	0	0	0	-1430	1	-1.43	0	0	0	0.12	6	3.3	59	0	1	1	3	1	0	0	0	1	0	1	0	0	0	0	0	0	0	0	0	0.0760342	1	0	1	0
20566	2	2	206	24200	6922.5	0	0	0	0	1	2510	1	2.51	0	0	0	0.134	4	2.5	43	0	6	1	3	1	0	0	0	1	0	1	0	0	0	0	0	1	0	0	1	0.172477	1	0	1	0
20567	2	2	206	24200	6922.5	0	0	0	0	1	17360	1	17.36	5	1	0	0.422	4	2.3	65	1	6	1	2	1	0	0	0	1	0	1	0	0	0	0	0	0	0	0	1	0.172477	1	0	1	0
20568	2	2	206	24200	1170	0	0	0	0	1	2940	1	2.94	0	0	0	1.152	4	2.5	55	0	11	1	3	0	0	0	0	1	0	1	0	0	0	0	0	0	0	0	1	0.172477	1	0	1	0
20569	2	2	206	24200	1170	0	0	0	0	1	12180	1	12.18	0	0	0	1.305	4	2.5	79	0	2	1	3	0	1	0	0	0	0	1	0	0	0	0	0	0	0	0	1	0.172477	1	0	1	0
20570	2	2	206	24200	243.75	0	0	0	0	1	33682	1	33.682	4	1	0	3.064	4	2.5	68	0	12	1	3	0	0	0	0	0	1	1	0	0	0	0	0	1	0	0	1	0.172477	1	0	1	0
20571	2	2	206	24200	243.75	0	0	0	0	1	21945	1	21.945	7	1	0	13.405	3	2	53	0	8	1	3	0	1	0	0	0	0	1	0	0	1	0	0	0	0	0	1	0.172477	1	0	1	0
20572	2	2	206	24200	243.75	0	0	0	0	1	32305	1	32.305	8	1	0	3.562	2	1.5	60	0	10	1	3	0	1	0	0	0	0	1	0	0	1	0	0	1	1	0	1	0.172477	1	0	1	0
20573	2	2	206	24200	243.75	0	0	0	0	1	27935	1	27.935	8	1	0	3.932	7	3.8	78	1	6	1	3	0	0	0	0	1	0	1	0	0	0	0	1	1	0	0	1	0.172477	1	0	1	0
20606	2	2	206	24205	843.75	1	0	0	0	0	465	1	0.465	0	0	0	0	4	2.1	37	1	7	0	3	0	0	1	0	0	0	1	0	0	0	0	0	1	0	0	1	0.172477	1	0	1	0
20607	2	2	206	24205	843.75	1	0	0	0	0	7515	1	7.515	0	0	0	0.383	4	2.3	79	0	1	1	3	0	1	0	0	0	0	1	0	0	0	0	0	0	1	0	1	0.172477	1	0	1	0
20608	2	2	206	24205	562.5	0	0	0	0	1	-80	1	-0.08	0	0	0	0.919	3	2	65	0	7	1	3	0	1	0	0	0	0	1	0	0	0	0	0	0	0	0	0	0.172477	1	0	1	0
20609	2	2	206	24205	562.5	0	0	0	0	1	2205	1	2.205	0	0	0	1.703	7	3.8	59	0	12	1	3	0	0	0	0	1	0	1	0	0	0	0	0	1	0	0	0	0.172477	1	0	1	0
20610	2	2	206	24205	562.5	0	0	0	0	1	3525	1	3.525	0	0	0	1.63	3	1.8	46	1	6	1	3	0	1	0	0	0	0	1	0	0	0	0	0	0	0	0	1	0.172477	1	0	1	0
20611	2	2	206	24205	562.5	0	0	0	0	1	2690	1	2.69	0	0	0	1.093	7	3.4	65	0	6	1	3	0	1	0	0	0	0	1	0	0	0	0	0	1	0	0	1	0.172477	1	0	1	0
20612	2	2	206	24205	562.5	0	0	0	0	1	11665	1	11.665	0	0	0	2.703	5	3	70	0	6	1	3	0	1	0	0	0	0	1	0	0	0	0	0	1	0	0	1	0.172477	1	0	1	0
20613	2	2	206	24205	562.5	0	0	0	0	1	8925	1	8.925	0	0	0	2.106	4	2.5	43	0	8	1	3	0	0	0	0	1	0	1	0	0	0	0	0	0	0	0	0	0.172477	1	0	1	0
20638	2	2	206	24209	3454	0	0	0	1	0	1866	1	1.866	8	1	0	0.205	7	3.4	62	1	2	1	3	0	0	0	0	0	1	1	0	0	0	0	0	0	0	0	1	0.172477	1	0	1	0
20639	2	2	206	24209	628	0	0	0	0	1	19420	1	19.42	8	1	0	1.14	5	2.6	45	0	8	1	3	0	0	0	0	1	0	1	0	0	1	1	1	0	0	0	1	0.172477	1	0	1	0
20640	2	2	206	24209	78.5	0	0	0	0	1	12630	1	12.63	0	0	0	2.298	4	2.3	69	0	13	1	3	0	0	0	0	0	1	1	0	0	0	0	0	1	0	0	0	0.172477	1	0	1	0
20641	2	2	206	24209	78.5	0	0	0	0	1	28690	1	28.69	8	1	0	1.581	2	1.5	58	0	13	1	3	0	0	0	0	1	0	1	0	0	0	1	0	1	0	0	1	0.172477	1	0	1	0
20642	2	2	206	24209	78.5	0	0	0	0	1	8600	1	8.6	0	0	0	2.679	3	2	60	0	8	1	3	0	0	0	0	1	0	1	0	0	1	0	0	1	1	0	0	0.172477	1	0	1	0
20643	2	2	206	24209	4710	1	0	0	0	0	755	0		0	0	0	0.651	3	2	56	0	7	1	2	1	0	0	1	0	0	0	0	0	0	0	0	0	0	0	0	0.172477	0	1	0	1
20644	2	2	206	24209	157	0	0	0	0	1	8085	1	8.085	0	0	0	2.489	4	2.3	63	0	13	1	3	0	0	0	0	0	1	1	0	0	0	0	0	1	0	0	1	0.172477	1	0	1	0
20645	2	2	206	24209	157	0	0	0	1	0	5770	1	5.77	0	0	0	1.278	5	3	85	0	6	1	3	0	1	0	0	0	0	1	0	0	0	0	0	1	1	0	0	0.172477	1	0	1	0
20947	2	2	206	24277	3510	0	0	0	0	1	5980	1	5.98	0	0	0	0.383	4	2.1	72	0	7	1	3	0	0	0	0	0	1	1	0	0	0	0	0	0	0	0	1	0.172477	1	0	1	0
20948	2	2	206	24277	3510	0	0	0	0	1	6340	1	6.34	0	0	0	0.574	3	2	53	0	8	1	3	0	0	0	0	1	0	1	0	0	0	0	0	0	0	0	1	0.172477	1	0	1	0
20949	2	2	206	24277	975	0	0	0	0	1	4665	1	4.665	0	0	0	1.915	4	1.9	36	1	8	1	3	0	0	0	0	0	1	1	0	0	0	0	0	0	0	0	1	0.172477	1	0	1	0
20950	2	2	206	24277	975	0	0	0	0	1	7668	1	7.668	0	0	0	1.034	2	1.5	56	0	10	1	3	0	0	1	0	0	0	1	0	0	0	0	0	1	0	0	1	0.172477	1	0	1	0
20951	2	2	206	24277	975	0	0	0	0	1	1385	1	1.385	0	0	0	1.34	3	2	70	1	1	1	3	1	0	0	1	0	0	1	0	0	0	0	0	0	0	0	0	0.172477	1	0	1	0
20952	2	2	206	24277	195	0	0	0	0	1	3180	1	3.18	0	0	0	0	1	1	80	1	4	0	3	0	0	0	0	0	1	1	0	0	0	1	0	0	0	0	0	0.172477	1	0	1	0
20953	2	2	206	24277	195	0	0	0	0	1	27865	1	27.865	0	0	0	5.481	3	2	65	0	8	1	3	0	0	0	0	0	1	1	0	0	1	0	1	1	0	0	1	0.172477	1	0	1	0
20954	2	2	206	24277	195	0	0	0	0	1	920	1	0.92	0	0	0	4.685	2	1.5	59	0	8	1	3	0	0	1	0	0	0	1	0	0	0	0	0	0	0	0	0	0.172477	1	0	1	0
20955	2	2	206	24278	3611	0	0	0	0	1	1940	1	1.94	0	0	0	0.095	3	1.8	71	1	1	1	3	1	0	0	0	1	0	1	0	0	0	0	0	0	0	0	1	0.172477	1	0	1	0
20956	2	2	206	24278	130.84	0	0	0	0	1	37730	1	37.73	15	1	0	1.71	4	2.3	58	0	8	1	3	0	1	0	0	0	0	1	0	0	0	1	0	1	0	0	1	0.172477	1	0	1	0
20957	2	2	206	24278	130.84	0	0	0	0	1	23040	1	23.04	0	0	0	1.026	5	2.8	66	1	1	1	3	1	0	0	0	1	0	1	0	0	0	1	0	1	0	0	1	0.172477	1	0	1	0
20958	2	2	206	24278	130.84	0	0	0	0	1	4272	1	4.272	6	1	0	1.71	10	4.9	82	1	1	1	3	0	0	0	0	0	1	1	0	0	0	0	0	0	0	0	1	0.172477	1	0	1	0
20959	2	2	206	24278	8242.5	1	0	0	0	0	1940	1	1.94	0	0	0	0.503	5	2.6	75	0	8	1	3	0	0	0	0	0	1	1	0	0	0	0	0	0	0	0	1	0.172477	1	0	1	0
20960	2	2	206	24278	628	0	0	0	0	1	5270	1	5.27	0	0	0	2.496	4	2.5	92	0	6	1	3	0	0	0	0	1	0	1	1	0	0	1	0	0	0	0	1	0.172477	1	0	1	0
20961	2	2	206	24278	628	0	0	0	0	1	10570	1	10.57	0	0	0	1.152	5	2.8	68	0	12	1	3	0	0	0	1	0	0	1	0	0	1	0	1	1	1	0	0	0.172477	1	0	1	0
20962	2	2	206	24278	628	0	0	0	0	1	6650	1	6.65	0	0	0	1.92	7	3.6	70	1	1	1	3	0	0	0	0	0	1	1	0	0	1	0	0	1	0	0	1	0.172477	1	0	1	0
20590	2	2	207	24203	565	0	0	0	0	1	3345	1	3.345	0	0	0	0.322	5	2.8	64	1	1	1	3	1	0	0	1	0	0	1	0	0	0	0	0	1	0	0	0	0.112165	0	0	1	0
20591	2	2	207	24203	565	0	0	0	1	0	3320	1	3.32	0	0	0	0	4	2.3	50	1	6	0	3	0	0	0	0	0	1	1	0	0	0	0	0	1	1	0	0	0.112165	0	0	1	0
20592	2	2	207	24203	565	0	0	0	0	1	3490	1	3.49	0	0	0	0	3	2	41	1	7	0	3	0	0	0	0	0	1	1	0	0	1	0	0	1	0	0	1	0.112165	0	0	1	0
20593	2	2	207	24203	565	0	0	0	0	1	5565	1	5.565	0	0	0	0.269	6	3.1	40	0	6	1	3	0	1	0	0	0	0	1	0	0	0	0	1	0	0	0	0	0.112165	0	0	1	0
20594	2	2	207	24203	565	0	0	0	1	0	2080	1	2.08	0	0	0	0.095	4	2.5	67	0	6	1	2	0	0	0	1	0	0	1	0	0	0	0	0	0	1	0	0	0.112165	0	0	1	0
20595	2	2	207	24203	565	0	0	0	0	1	1785	1	1.785	0	0	0	0.574	3	1.8	34	1	6	1	2	1	0	0	0	1	0	1	0	0	0	0	0	0	0	0	0	0.112165	0	0	1	0
20596	2	2	207	24203	565	0	0	0	0	1	14718	1	14.718	0	0	0	0.383	2	1.5	59	0	12	1	1	0	0	0	0	0	1	1	0	0	0	0	0	0	0	0	0	0.112165	0	0	1	0
20597	2	2	207	24203	282.5	0	0	0	0	1	16895	1	16.895	0	0	0	2.305	7	3.8	43	0	7	1	2	0	1	0	0	0	0	1	0	0	0	0	1	0	0	0	0	0.112165	0	0	1	0
20614	2	2	207	24206	561	0	0	0	0	1	2505	1	2.505	0	0	0	0.456	5	3	65	0	7	1	3	0	0	0	0	0	1	1	0	0	0	0	0	0	0	0	1	0.112165	0	0	1	0
20615	2	2	207	24206	561	0	0	0	1	0	12975	1	12.975	0	0	0	0.684	3	2	62	0	1	1	3	0	0	0	1	0	0	1	0	0	0	1	1	0	0	0	0	0.112165	0	0	1	0
20616	2	2	207	24206	561	1	0	0	0	0	525	1	0.525	0	0	0	0.076	2	1.5	50	0	10	1	3	0	0	0	0	0	1	1	0	0	0	0	0	0	1	0	0	0.112165	0	0	1	0
20617	2	2	207	24206	561	1	0	0	0	0	2000	1	2	0	0	0	0.057	7	3.6	58	0	6	1	3	1	0	0	0	1	0	1	0	0	0	0	0	0	1	0	1	0.112165	0	0	1	0
20618	2	2	207	24206	1353	1	0	0	0	0	2340	1	2.34	0	0	0	0.072	4	2.3	42	0	5	1	2	1	0	0	0	1	0	1	0	0	0	0	0	0	1	0	0	0.112165	0	0	1	0
20619	2	2	207	24206	1353	1	0	0	0	0	3320	1	3.32	0	0	0	0.133	6	3.5	42	0	7	1	3	0	0	0	0	1	0	1	0	0	0	0	0	1	0	0	0	0.112165	0	0	1	0
20620	2	2	207	24206	1353	1	0	0	0	0	19720	1	19.72	0	0	0	0.722	2	1.5	65	0	5	1	3	0	0	0	0	0	1	1	0	0	1	1	0	0	1	0	0	0.112165	0	0	1	0
20621	2	2	207	24206	1353	0	0	0	0	1	6862	1	6.862	0	0	0	0.38	4	2.5	68	0	6	1	3	0	0	0	0	0	1	1	0	0	0	0	0	0	0	0	0	0.112165	0	0	1	0
20622	2	2	207	24207	1725	0	0	0	1	0	15950	1	15.95	10	1	0	0.574	10	4.7	77	0	4	1	3	1	0	0	1	0	0	1	0	0	0	0	0	0	0	0	1	0.112165	0	0	1	0
20623	2	2	207	24207	112.5	0	0	0	1	0	54780	1	54.78	8	1	0	1.532	6	3.1	57	0	6	1	3	0	1	0	0	0	0	1	0	0	0	0	1	1	0	0	1	0.112165	0	0	1	0
20624	2	2	207	24207	112.5	0	0	0	1	0	77900	1	77.9	7	1	0	1.532	6	3.5	40	0	8	1	3	0	1	0	0	0	0	1	0	0	0	0	1	1	0	0	0	0.112165	0	0	1	0
20625	2	2	207	24207	7500	0	0	0	1	0	1768	1	1.768	8	1	0	0.421	4	2.5	51	0	5	1	3	1	0	0	1	0	0	1	0	0	0	0	0	0	0	0	0	0.112165	0	0	1	0
20626	2	2	207	24207	234.38	0	0	0	0	1	127450	1	127.45	10	1	0	4.046	6	3.1	58	0	12	1	3	0	1	0	0	0	0	1	0	0	0	0	0	1	0	0	1	0.112165	0	0	1	0
20627	2	2	207	24207	234.38	0	0	0	0	1	69135	1	69.135	8	1	0	2.681	4	2.5	48	0	7	1	3	0	1	0	0	0	0	1	0	0	1	0	0	1	0	0	0	0.112165	0	0	1	0
20628	2	2	207	24207	234.38	0	0	0	0	1	728150	0		4	1	0	6.135	5	2.8	46	0	8	1	3	0	1	0	0	0	0	1	1	0	1	0	0	1	0	0	0	0.112165	0	1	0	1
20629	2	2	207	24207	234.38	0	0	0	0	1	210360	1	210.36	0	0	0	6.575	4	2.3	30	0	10	1	3	0	1	0	0	0	0	1	0	0	0	0	0	1	1	0	1	0.112165	0	0	1	0
20630	2	2	207	24208	903	0	0	0	0	1	23730	1	23.73	0	0	0	0.383	5	3	52	0	8	1	3	1	0	1	0	0	0	1	0	0	0	0	0	0	1	0	1	0.112165	0	0	1	0
20631	2	2	207	24208	21	0	0	0	1	0	77070	1	77.07	0	0	0	1.267	6	3.1	64	0	8	1	3	0	0	0	1	0	0	1	0	0	0	0	0	1	0	0	1	0.112165	0	0	1	0
20632	2	2	207	24208	21	0	0	0	1	0	6730	1	6.73	0	0	0	0	4	2.5	50	0	8	0	3	0	0	0	0	1	0	1	0	0	0	0	0	0	1	0	1	0.112165	0	0	1	0
20633	2	2	207	24208	7056	0	0	0	1	0	11735	1	11.735	0	0	0	0	2	1.5	45	1	6	1	2	1	0	0	0	0	1	1	0	0	1	0	1	1	0	0	1	0.112165	0	0	1	0
20634	2	2	207	24208	147	0	0	0	1	0	10985	1	10.985	0	0	0	1.34	3	1.8	79	0	7	1	3	0	0	0	0	1	0	1	0	0	0	0	0	0	0	0	0	0.112165	0	0	1	0
20635	2	2	207	24208	147	0	0	0	1	0	16350	1	16.35	0	0	0	1.532	4	2.5	65	0	6	1	3	0	1	0	0	0	0	1	0	0	0	0	0	0	0	0	0	0.112165	0	0	1	0
20636	2	2	207	24208	147	0	0	0	1	0	35200	1	35.2	5	1	0	1.82	3	2	78	0	10	1	3	0	0	0	0	0	1	1	1	0	0	0	0	1	1	0	0	0.112165	0	0	1	0
20637	2	2	207	24208	147	0	0	0	1	0	22130	1	22.13	4	1	0	1.064	3	2	60	0	8	1	3	0	0	0	0	1	0	1	0	0	0	0	0	0	0	0	1	0.112165	0	0	1	0
20979	2	2	207	24281	468.75	1	0	0	0	0	5140	1	5.14	0	0	0	0.076	6	3.1	60	0	6	1	1	1	0	0	0	1	0	1	0	0	0	0	0	0	0	0	1	0.112165	0	0	1	0
20980	2	2	207	24281	468.75	0	0	0	1	0	incomplete data	0				0	0.005	3	2	59	0	6	1	2	0	0	0	0	1	0	1	0	0	0	0	0	0	0	0	1	0.112165	0	1	0	1
20981	2	2	207	24281	468.75	0	0	0	0	1	4570	1	4.57	0	0	0	0	3	2	43	1	7	0	3	0	0	1	0	0	0	1	0	0	0	0	0	0	0	0	1	0.112165	0	0	1	0
20982	2	2	207	24281	468.75	0	0	0	0	1	8670	1	8.67	0	0	0	0	3	1.6	35	1	8	0	3	0	0	0	0	0	1	1	0	0	0	0	0	0	0	0	1	0.112165	0	0	1	0
20983	2	2	207	24281	2125	0	0	0	0	1	240	1	0.24	0	0	0	0.134	5	3	78	1	1	1	3	0	0	0	0	1	0	1	0	0	0	0	0	0	1	0	1	0.112165	0	0	1	0
20984	2	2	207	24281	2125	0	0	0	0	1	9140	1	9.14	0	0	0	0.614	2	1.5	75	0	8	1	2	0	0	0	0	0	1	1	0	0	0	0	0	0	1	0	0	0.112165	0	0	1	0
20985	2	2	207	24281	2125	0	0	0	0	1	-750	1	-0.75	0	0	0	0	3	2	47	1	8	1	3	0	0	0	0	0	1	1	0	0	0	0	0	0	1	0	1	0.112165	0	0	1	0
20986	2	2	207	24281	187.5	0	0	0	0	1	5590	1	5.59	0	0	0	0.017	5	3	45	0	6	1	3	1	0	0	1	0	0	1	0	0	0	0	0	0	1	0	1	0.112165	0	0	1	0
20987	2	2	207	24282	1452	0	0	0	0	1	10755	1	10.755	0	0	0	0.306	5	2.8	65	0	6	1	3	0	1	0	0	0	0	1	0	0	0	0	0	1	0	0	1	0.112165	0	0	1	0
20988	2	2	207	24282	396	0	0	0	1	0	25460	1	25.46	0	0	0	0.919	4	2.3	65	1	1	1	3	0	1	0	0	0	0	1	0	0	0	0	1	1	0	0	1	0.112165	0	0	1	0
20989	2	2	207	24282	198	0	0	0	0	1	19940	1	19.94	0	0	0	2.298	3	2	61	0	12	1	3	0	0	0	0	0	1	1	0	0	0	1	0	0	0	0	0	0.112165	0	0	1	0
20990	2	2	207	24282	198	0	0	0	0	1	95900	1	95.9	4	1	0	0.613	6	3.3	73	0	1	1	3	0	1	0	0	0	0	1	0	0	0	0	1	0	0	0	0	0.112165	0	0	1	0
20991	2	2	207	24282	4752	0	0	0	1	0	2110	1	2.11	0	0	0	0.114	4	2.5	44	0	1	1	3	1	0	0	1	0	0	1	0	0	0	0	0	0	0	0	0	0.112165	0	0	1	0
20992	2	2	207	24282	132	0	0	0	1	0	12020	1	12.02	0	0	0	1.084	4	2.1	66	1	5	1	3	0	1	0	0	0	0	1	0	0	1	0	0	1	1	0	0	0.112165	0	0	1	0
20993	2	2	207	24282	132	0	0	0	0	1	239900	1	239.9	6	1	0	3.064	7	4	46	0	8	1	3	0	1	0	0	0	0	1	0	0	0	0	1	1	0	0	0	0.112165	0	0	1	0
20994	2	2	207	24282	132	0	0	0	0	1	535900	1	535.9	6	1	0	2.296	4	2.3	66	0	8	1	3	0	1	0	0	0	0	1	0	0	1	0	0	1	0	0	0	0.112165	0	0	1	0
21003	2	2	207	24284	4614.17	1	0	0	0	0	170	1	0.17	0	0	0	0.383	3	1.8	41	1	6	1	3	0	0	0	0	0	1	1	0	0	0	0	0	0	0	0	1	0.112165	0	0	1	0
21004	2	2	207	24284	4614.17	1	0	0	0	0	incomplete data	0				0	0.536	1	1	40	0	6	1	2	1	0	0	0	1	0	1	0	0	0	0	0	0	0	0	1	0.112165	0	1	0	1
21005	2	2	207	24284	4614.17	1	0	0	0	0	-815	1	-0.815	0	0	0	0.076	5	2.6	45	0	10	1	3	0	0	0	0	1	0	1	0	0	1	0	0	0	0	0	0	0.112165	0	0	1	0
21006	2	2	207	24284	282.5	0	0	0	0	1	10790	1	10.79	0	0	0	1.525	4	2.5	60	1	1	1	3	0	0	0	0	0	1	1	0	0	0	0	1	0	0	0	0	0.112165	0	0	1	0
21007	2	2	207	24284	282.5	0	0	0	0	1	11640	1	11.64	0	0	0	1.532	4	2.3	65	1	1	1	3	0	0	0	0	0	1	1	1	0	1	0	0	1	0	0	1	0.112165	0	0	1	0
21008	2	2	207	24284	282.5	1	0	0	0	0	5195	1	5.195	0	0	0	1.241	4	2.5	70	0	5	1	2	0	0	0	0	0	1	1	0	0	0	0	0	0	0	0	1	0.112165	0	0	1	0
21009	2	2	207	24284	282.5	1	0	0	0	0	26750	1	26.75	4	1	0	1.624	8	3.9	66	0	7	1	3	0	0	0	0	0	1	1	0	0	0	0	0	0	1	0	1	0.112165	0	0	1	0
21010	2	2	207	24284	282.5	1	0	0	0	0	2795	1	2.795	0	0	0	1.537	7	3.4	63	0	13	1	3	0	0	0	0	0	1	1	0	0	0	0	0	1	0	0	1	0.112165	0	0	1	0
21011	2	2	207	24285	1029	0	0	0	1	0	24050	1	24.05	0	0	0	0.268	6	3.3	65	0	8	1	3	0	0	0	0	1	0	1	0	0	0	0	0	1	1	0	1	0.112165	0	0	1	0
21012	2	2	207	24285	5481	0	0	0	1	0	6250	1	6.25	0	0	0	0.344	4	2.3	49	0	8	1	1	0	1	0	0	0	0	1	0	0	0	0	0	0	0	0	1	0.112165	0	0	1	0
21013	2	2	207	24285	330.75	0	0	0	1	0	106990	1	106.99	0	0	0	2.451	6	3.1	65	0	13	1	3	0	1	0	0	0	0	1	0	0	0	0	0	0	0	0	1	0.112165	0	0	1	0
21014	2	2	207	24285	330.75	0	0	0	1	0	51270	1	51.27	0	0	0	1.111	6	3.1	58	0	8	1	3	0	1	0	0	0	0	1	0	0	1	0	0	1	0	0	1	0.112165	0	0	1	0
21015	2	2	207	24285	330.75	0	0	0	0	1	34740	1	34.74	0	0	0	0.957	5	3	51	0	6	1	3	0	0	0	0	0	0	1	0	0	1	0	0	0	1	0	1	0.112165	0	0	1	0
21016	2	2	207	24285	330.75	0	0	0	0	1	43150	1	43.15	0	0	0	1.455	7	4	75	0	5	1	3	0	1	0	0	0	0	1	0	0	0	0	0	0	1	0	1	0.112165	0	0	1	0
21017	2	2	207	24285	378	0	0	0	0	1	68650	1	68.65	0	0	0	2.298	11	5.4	52	0	8	1	3	0	1	0	0	0	0	1	0	0	0	0	0	0	0	0	1	0.112165	0	0	1	0
20971	2	2	208	24280	1674	0	0	0	0	1	1650	1	1.65	0	0	0	0.225	4	2.1	42	0	7	1	3	0	0	0	1	0	0	1	0	0	0	0	0	0	0	0	0	0.0389565	1	0	0	0
20972	2	2	208	24280	1674	0	0	0	0	1	4610	1	4.61	0	0	1	0	1	1	50	0	1	1	3	0	0	0	0	0	1	1	0	0	0	0	0	0	1	0	1	0.0389565	1	0	0	0
20973	2	2	208	24280	1674	0	0	0	0	1	8205	1	8.205	0	0	0	0.3	4	2.1	38	0	7	1	3	0	1	0	0	0	0	1	0	0	1	0	0	0	0	0	1	0.0389565	1	0	0	0
20974	2	2	208	24280	1674	1	0	0	0	0	2705	1	2.705	0	0	0	0.225	8	4.1	65	1	1	1	3	0	0	0	0	1	0	1	0	0	1	0	0	0	1	0	0	0.0389565	1	0	0	0
20975	2	2	208	24280	1674	0	0	0	0	1	21730	1	21.73	0	0	0	0.526	6	3.1	63	0	7	1	3	1	1	0	0	0	0	1	0	0	0	0	0	0	0	0	1	0.0389565	1	0	0	0
20976	2	2	208	24280	1674	0	0	0	0	1	2920	1	2.92	0	0	0	0.225	2	1.5	39	0	10	1	3	1	1	0	0	0	0	1	0	0	0	0	0	0	0	0	0	0.0389565	1	0	0	0
20977	2	2	208	24280	1674	0	0	0	0	1	17860	1	17.86	0	0	0	0.716	9	4	63	1	7	1	3	0	1	0	0	0	0	1	0	0	0	0	0	0	0	0	0	0.0389565	1	0	0	0
20978	2	2	208	24280	378	0	0	0	0	1	38570	1	38.57	0	0	0	6.118	7	3.6	58	0	5	1	3	1	1	0	0	0	0	1	0	0	1	0	1	1	1	0	0	0.0389565	1	0	0	0
20995	2	2	208	24283	1147.5	0	0	0	0	1	2805	1	2.805	0	0	0	0.32	4	2.3	29	0	8	1	3	0	0	0	0	1	0	1	0	0	1	0	1	0	0	0	0	0.0389565	1	0	0	0
20996	2	2	208	24283	382.5	0	0	0	0	1	3155	1	3.155	0	0	0	0	4	2.1	32	0	8	0	2	1	0	0	1	0	0	1	0	0	0	0	0	0	0	0	1	0.0389565	1	0	0	0
20997	2	2	208	24283	127.5	0	0	0	0	1	20403	1	20.403	0	0	0	2	7	3.6	50	1	1	1	3	1	0	0	0	0	1	1	0	0	1	0	1	0	1	0	1	0.0389565	1	0	0	0
20998	2	2	208	24283	127.5	0	0	0	0	1	32850	1	32.85	4	1	0	3.064	12	6.1	75	0	1	1	3	0	0	0	0	1	0	1	0	0	1	0	1	1	0	0	0	0.0389565	1	0	0	0
20999	2	2	208	24283	127.5	0	0	0	0	1	44370	1	44.37	0	0	0	1.44	17	8	63	0	1	1	3	0	0	0	0	1	0	1	1	0	0	0	0	0	1	0	1	0.0389565	1	0	0	0
21000	2	2	208	24283	7310	0	0	0	0	1	53680	1	53.68	0	0	0	0.727	6	3.3	62	0	8	1	3	0	0	0	0	1	0	1	0	0	1	0	1	0	0	0	0	0.0389565	1	0	0	0
21001	2	2	208	24283	1020	0	0	0	0	1	16870	1	16.87	0	0	0	1.34	5	2.6	68	1	1	1	3	1	1	0	0	0	0	1	0	0	0	0	0	0	0	0	0	0.0389565	1	0	0	0
21002	2	2	208	24283	170	0	0	0	0	1	88775	1	88.775	4	1	0	2.588	12	5.9	59	0	6	1	3	0	1	0	0	0	0	1	0	0	1	0	1	0	1	0	0	0.0389565	1	0	0	0
21042	2	2	208	24289	4840	0	0	0	0	1	6480	1	6.48	0	0	0	0	2	1.5	44	0	8	1	3	0	0	0	0	1	0	1	0	0	1	0	1	0	0	0	0	0.0389565	1	0	0	0
21043	2	2	208	24289	4840	1	0	0	0	0	1860	1	1.86	0	0	0	0.3	2	1.5	48	0	8	1	3	1	0	0	1	0	0	1	0	0	1	0	1	1	0	0	0	0.0389565	1	0	0	0
21044	2	2	208	24289	550	0	0	0	0	1	1690	1	1.69	0	0	0	2.03	4	2.5	47	0	7	1	3	0	0	0	0	1	0	1	0	0	0	0	1	1	1	0	0	0.0389565	1	0	0	0
21045	2	2	208	24289	550	0	0	0	0	1	7920	1	7.92	0	0	0	1.625	4	2.3	50	1	1	1	2	0	0	1	0	0	0	1	0	0	0	1	1	0	0	0	0	0.0389565	1	0	0	0
21046	2	2	208	24289	137.5	0	0	0	0	1	11210	1	11.21	0	0	0	2.632	3	2	49	0	10	1	3	0	0	1	0	0	0	1	1	0	1	0	1	1	0	0	0	0.0389565	1	0	0	0
21047	2	2	208	24289	137.5	0	0	0	0	1	24980	1	24.98	0	0	0	2.632	4	2.5	70	0	1	1	3	1	0	0	0	0	1	1	0	0	1	1	0	0	1	0	1	0.0389565	1	0	0	0
21048	2	2	208	24289	137.5	0	0	0	0	1	14770	1	14.77	0	0	0	2.105	2	1.5	46	0	7	1	3	0	1	0	0	0	0	1	1	0	1	0	1	0	1	0	0	0.0389565	1	0	0	0
21049	2	2	208	24289	137.5	1	0	0	0	0	17220	1	17.22	0	0	0	1.88	5	2.8	58	0	7	1	1	0	0	0	1	0	0	1	0	0	1	0	1	0	0	0	0	0.0389565	1	0	0	0
21058	2	2	208	24291	1041.25	0	0	0	0	1	520	1	0.52	0	0	0	0	2	1.5	47	1	7	0	3	1	0	0	0	0	1	1	0	0	0	1	0	0	0	0	1	0.0389565	1	0	0	0
21059	2	2	208	24291	1041.25	1	0	0	0	0	7430	1	7.43	0	0	0	0.3	9	4.4	62	0	11	1	3	1	0	0	0	0	1	1	0	0	0	0	0	0	0	0	0	0.0389565	1	0	0	0
21060	2	2	208	24291	42.5	0	0	0	0	1	23160	1	23.16	12	1	0	1.128	7	3.6	64	0	5	1	3	0	1	0	0	0	0	1	1	0	1	0	0	1	0	0	0	0.0389565	1	0	0	0
21061	2	2	208	24291	6346.67	0	0	0	0	1	1990	1	1.99	0	0	0	0.601	2	1.5	65	0	8	1	3	0	0	0	0	0	1	1	0	0	1	1	0	1	0	0	1	0.0389565	1	0	0	0
21062	2	2	208	24291	6346.67	0	0	0	0	1	630	1	0.63	0	0	0	0.15	5	2.6	65	1	1	1	3	0	0	0	1	0	0	1	0	0	0	0	0	0	0	0	0	0.0389565	1	0	0	0
21063	2	2	208	24291	6346.67	0	0	0	0	1	66450	1	66.45	0	0	0	1.278	1	1	88	0	2	1	2	0	1	0	0	0	0	1	0	0	0	1	0	0	0	0	1	0.0389565	1	0	0	0
21064	2	2	208	24291	595	0	0	0	0	1	68750	1	68.75	0	0	0	1.901	4	2.5	72	0	11	1	3	0	0	0	0	0	1	1	0	0	1	1	0	1	0	0	1	0.0389565	1	0	0	0
21065	2	2	208	24291	595	0	0	0	0	1	34365	1	34.365	0	0	0	0	1	1	43	1	6	0	2	0	1	0	0	0	0	1	0	0	0	1	1	0	1	0	1	0.0389565	1	0	0	0
21066	2	2	208	24292	4070	0	0	0	0	1	16245	1	16.245	0	0	0	0.676	3	2	79	1	1	1	2	1	0	0	0	0	1	1	0	0	1	0	1	0	0	0	1	0.0389565	1	0	0	0
21067	2	2	208	24292	4070	0	0	0	0	1	801	1	0.801	0	0	0	0.239	2	1.5	78	1	1	1	3	1	0	0	0	0	1	1	0	0	1	0	0	0	0	0	0	0.0389565	1	0	0	0
21068	2	2	208	24292	176	0	0	0	0	1	27050	1	27.05	10	1	0	3.192	7	3.6	68	0	7	1	3	1	0	0	0	1	0	1	1	0	1	0	0	1	0	0	0	0.0389565	1	0	0	0
21069	2	2	208	24292	176	0	0	0	0	1	12950	1	12.95	0	0	0	1.504	5	3	57	0	8	1	3	0	0	0	0	0	1	1	0	0	1	0	1	1	0	0	1	0.0389565	1	0	0	0
21070	2	2	208	24292	176	0	0	0	0	1	-173	1	-0.173	0	0	0	1.353	5	2.8	36	0	7	1	2	1	0	0	1	0	0	1	0	0	1	0	1	0	0	0	0	0.0389565	1	0	0	0
21071	2	2	208	24292	176	0	0	0	0	1	14720	1	14.72	0	0	0	1.504	5	2.6	70	0	1	1	3	1	1	0	0	0	0	1	0	0	0	0	1	1	1	0	0	0.0389565	1	0	0	0
21072	2	2	208	24292	176	0	0	0	0	1	13830	1	13.83	0	0	0	2.356	3	2	77	0	1	1	3	0	1	0	0	0	0	1	0	0	0	1	1	0	0	0	0	0.0389565	1	0	0	0
21073	2	2	208	24292	110	0	0	0	0	1	25030	1	25.03	0	0	0	3.485	6	3.3	85	0	1	1	3	0	0	0	0	0	1	1	1	0	1	0	0	0	1	0	1	0.0389565	1	0	0	0
21082	2	2	208	24294	693	0	0	0	1	0	3805	1	3.805	0	0	0	0.574	4	2.5	67	0	8	1	3	0	0	0	0	0	1	0	0	0	0	1	1	0	0	0	1	0.0389565	1	0	0	0
21083	2	2	208	24294	693	0	0	0	1	0	6038	1	6.038	0	0	0	0.301	8	4.3	55	0	6	1	3	1	0	0	0	1	0	1	0	0	0	0	1	0	1	0	1	0.0389565	1	0	0	0
21084	2	2	208	24294	693	0	0	0	1	0	18960	1	18.96	0	0	0	0.978	2	1.5	95	0	1	1	3	0	1	0	0	0	0	1	0	0	1	0	1	0	0	0	1	0.0389565	1	0	0	0
21085	2	2	208	24294	693	0	0	0	1	0	100	1	0.1	0	0	0	1.119	9	4.4	55	0	1	1	3	1	0	0	0	1	0	1	0	0	0	0	0	0	1	0	1	0.0389565	1	0	0	0
21086	2	2	208	24294	693	0	0	0	1	0	3640	1	3.64	0	0	0	0.901	3	2	49	0	2	1	2	1	0	0	0	1	0	1	0	0	1	0	1	0	1	0	0	0.0389565	1	0	0	0
21087	2	2	208	24294	693	0	0	0	0	1	12710	1	12.71	0	0	0	0.353	3	2	64	0	13	1	3	0	0	0	0	0	1	1	0	0	1	1	0	0	1	0	0	0.0389565	1	0	0	0
21088	2	2	208	24294	378	0	0	0	1	0	22980	1	22.98	0	0	0	1.14	2	1.5	66	0	11	1	3	0	0	0	0	0	1	1	0	0	1	0	1	0	1	0	0	0.0389565	1	0	0	0
21089	2	2	208	24294	378	0	0	0	1	0	7322	1	7.322	0	0	0	0.488	6	3.5	57	0	8	1	3	1	0	0	0	1	0	1	0	0	0	0	0	0	1	0	0	0.0389565	1	0	0	0
20209	2	2	209	24144	2576	0	0	0	0	1	75740	1	75.74	4	1	0	0.88	8	4.1	60	0	7	1	3	1	0	0	1	0	0	1	0	0	1	0	0	1	0	0	1	0.0397509	0	0	1	0
20210	2	2	209	24144	161	0	0	0	0	1	10100	1	10.1	5	1	0	1.76	5	2.6	45	0	8	1	3	0	0	0	0	1	0	1	1	0	0	0	0	0	1	0	0	0.0397509	0	0	1	0
20211	2	2	209	24144	161	0	0	0	0	1	2060	1	2.06	0	0	0	1.2	4	2.1	36	0	8	1	3	0	1	0	0	0	0	1	0	0	0	0	0	0	1	0	0	0.0397509	0	0	1	0
20212	2	2	209	24144	230	0	0	0	0	1	2335	1	2.335	5	1	0	2.08	5	3	70	0	8	1	3	0	0	0	0	1	0	1	0	0	0	0	1	1	0	0	0	0.0397509	0	0	1	0
20213	2	2	209	24144	230	0	0	0	0	1	-900	1	-0.9	0	0	0	2.08	7	3.6	65	0	5	1	3	1	1	0	0	0	0	1	1	0	0	0	0	0	0	0	0	0.0397509	0	0	1	0
20214	2	2	209	24144	4508	0	0	0	0	1	4780	1	4.78	4	1	0	0.32	5	2.8	38	0	7	1	3	0	1	0	0	0	0	1	0	0	1	0	1	0	0	0	0	0.0397509	0	0	1	0
20215	2	2	209	24144	276	1	0	0	0	0	8620	1	8.62	0	0	0	2.56	4	2.5	45	0	10	1	3	1	1	0	0	0	0	1	1	0	0	0	0	0	0	0	1	0.0397509	0	0	1	0
20216	2	2	209	24144	276	1	0	0	0	0	8380	1	8.38	0	0	0	2.24	4	2.5	58	0	7	1	3	0	0	0	0	1	0	1	0	0	1	0	1	0	0	0	1	0.0397509	0	0	1	0
21018	2	2	209	24286	855	1	0	0	0	0	2350	1	2.35	0	0	0	0.84	5	2.6	60	1	1	1	3	1	0	0	1	0	0	1	0	0	0	0	0	0	0	0	0	0.0397509	0	0	1	0
21019	2	2	209	24286	855	0	0	0	0	1	20595	1	20.595	0	0	0	0	5	2.8	50	0	6	1	3		1	0	0	0	0	1	0	0	1	0	0	1	0	0	0	0.0397509	0	0	1	0
21020	2	2	209	24286	855	0	0	0	0	1	-3987	1	-3.987	0	0	0	0	5	2.6	28	0	1	0	2		0	0	0	1	0	1	0	0	1	0	0	1	0	0	0	0.0397509	0	0	1	0
21021	2	2	209	24286	855	0	0	0	0	1	9260	1	9.26	0	0	0	0.682	9	3.6	45	0	8	1	3	0	1	0	0	0	0	1	1	0	0	0	0	1	0	0	0	0.0397509	0	0	1	0
21022	2	2	209	24286	855	1	0	0	0	0	1475	1	1.475	0	0	0	0.709	7	3.4	77	0	5	1	3	1	0	1	0	0	0	1	1	0	1	0	0	1	0	0	0	0.0397509	0	0	1	0
21023	2	2	209	24286	855	0	0	0	0	1	955	1	0.955	0	0	0	0	2	1.5	50	0	1	0	1		0	0	0	1	0	0	0	0	1	0	0	1	0	0	0	0.0397509	0	0	1	0
21024	2	2	209	24286	855	0	0	0	0	1	8110	1	8.11	0	0	0	0	4	2.1	36	0	1	0	3		1	0	0	0	0	1	0	0	1	0	0	1	0	0	0	0.0397509	0	0	1	0
21025	2	2	209	24286	855	0	0	0	0	1	35825	1	35.825	0	0	0	2.905	11	5.6	72	0	8	1	3	0	0	1	0	0	0	0	0	0	1	0	0	1	0	0	1	0.0397509	0	0	1	0
21026	2	2	209	24287	1375	0	0	0	0	1	incomplete data	0				0	0.772	4	2.5	61	0	13	1	3	0	0	1	0	0	0	0	0	0	1	0	0	1	0	0	1	0.0397509	0	1	0	1
21027	2	2	209	24287	1375	0	0	0	0	1	incomplete data	0				0	0.436	1	1	50	1	8	1	3	0	0	0	0	0	1	0	0	0	1	0	0	1	0	0	1	0.0397509	0	1	0	1
21028	2	2	209	24287	1375	1	0	0	0	0	-1875	1	-1.875	5	1	0	0.756	6	3.3	88	0	1	1	3	1	0	0	0	1	0	0	0	0	0	0	0	1	0	0	1	0.0397509	0	0	1	0
21029	2	2	209	24287	1375	0	0	0	0	1	110235	1	110.235	0	0	0	1.77	4	2.5	82	0	7	1	3	0	1	0	0	0	0	0	0	0	1	0	0	1	0	0	0	0.0397509	0	0	1	0
21030	2	2	209	24287	250	0	0	0	0	1	13290	1	13.29	0	0	0	1.232	8	4.3	63	0	12	1	3	0	0	0	0	1	0	1	0	0	0	0	0	1	0	0	1	0.0397509	0	0	1	0
21031	2	2	209	24287	250	0	0	0	0	1	86740	1	86.74	0	0	0	2.184	8	4.1	58	0	7	1	3	1	0	1	0	0	0	1	0	0	0	0	0	1	0	0	1	0.0397509	0	0	1	0
21032	2	2	209	24287	250	0	0	0	0	1	121250	1	121.25	0	0	0	3.352	3	2	51	0	8	1	3	0	0	0	0	1	0	1	0	0	1	0	0	1	0	0	1	0.0397509	0	0	1	0
21033	2	2	209	24287	250	0	0	0	0	1	incomplete data	0				0	7.2	14	7.1	80	0	7	1	3	0	0	0	0	1	0	1	0	0	1	0	0	1	0	0	1	0.0397509	0	1	0	1
21034	2	2	209	24288	1521	0	1	0	0	0	2080	1	2.08	0	0	0	0.168	9	4.2	36	0	1	1	2	1	0	0	0	1	0	1	0	0	0	0	0	1	0	0	0	0.0397509	0	0	1	0
21035	2	2	209	24288	1521	1	0	0	0	0	3250	1	3.25	0	0	0	0	5	3	44	0	1	1	2	0	0	0	0	1	0	1	0	0	0	0	0	0	0	0	0	0.0397509	0	0	1	0
21036	2	2	209	24288	1521	0	0	0	0	1	5610	1	5.61	0	0	0	0.42	4	2.5	65	1	1	1	3	1	1	0	0	0	0	1	0	0	0	0	0	1	0	0	0	0.0397509	0	0	1	0
21037	2	2	209	24288	1521	1	0	0	0	0	-1515	1	-1.515	0	0	0	0.096	5	2.6	48	0	1	1	2	0	0	0	0	1	0	1	0	0	0	0	0	0	0	0	0	0.0397509	0	0	1	0
21038	2	2	209	24288	1521	0	0	0	0	1	6150	1	6.15	0	0	0	0.336	6	3.1	47	0	7	1	3	0	0	0	0	1	0	1	0	0	1	0	1	1	0	0	0	0.0397509	0	0	1	0
21039	2	2	209	24288	117	0	0	0	0	1	40720	1	40.72	11	1	0	0.564	5	3	44	0	13	1	3	0	0	0	0	1	0	1	0	0	1	0	0	0	0	0	0	0.0397509	0	0	1	0
21040	2	2	209	24288	117	0	0	0	0	1	17910	1	17.91	0	0	0	1.192	6	3.3	46	0	1	1	3	0	1	0	0	0	0	1	0	0	1	0	0	1	0	0	0	0.0397509	0	0	1	0
21041	2	2	209	24288	117	0	0	0	0	1	21050	1	21.05	0	0	0	1.884	10	4.7	59	0	6	1	3	0	0	0	0	1	0	1	0	0	0	0	0	0	0	0	0	0.0397509	0	0	1	0
21050	2	2	209	24290	3625	1	0	0	0	0	15635	1	15.635	0	0	0	0.168	4	2.3	41	0	6	1	3	0	0	0	0	1	0	0	0	0	1	0	0	1	0	0	0	0.0397509	0	0	1	0
21051	2	2	209	24290	3625	1	0	0	0	0	7265	1	7.265	6	1	0	0.336	3	2	62	0	1	1	3	0	0	0	0	1	0	1	0	0	0	0	0	0	0	0	0	0.0397509	0	0	1	0
21052	2	2	209	24290	625	1	0	0	0	0	-8620	1	-8.62	0	0	0	1.04	2	1.5	50	0	5	1	3	1	0	1	0	0	0	1	1	0	0	0	0	0	0	0	0	0.0397509	0	0	1	0
21053	2	2	209	24290	625	1	0	0	0	0	25365	1	25.365	0	0	0	0.421	4	2.5	45	0	5	1	3	1	0	0	0	1	0	1	0	0	0	0	0	1	0	0	1	0.0397509	0	0	1	0
21054	2	2	209	24290	437.5	0	0	0	0	1	32040	1	32.04	10	1	0	3.789	5	3	50	0	8	1	3	0	0	0	0	1	0	1	0	0	1	0	0	1	0	0	0	0.0397509	0	0	1	0
21055	2	2	209	24290	437.5	1	0	0	0	0	18770	1	18.77	5	1	0	2.189	5	2.6	39	0	12	1	3	0	0	0	0	1	0	1	0	0	1	0	1	1	0	0	0	0.0397509	0	0	1	0
21056	2	2	209	24290	437.5	0	0	0	0	1	9100	1	9.1	11	1	0	1.684	4	2.5	48	0	8	1	3	0	1	0	0	0	0	1	0	0	0	0	1	1	0	0	1	0.0397509	0	0	1	0
21057	2	2	209	24290	437.5	1	0	0	0	0	7590	1	7.59	9	1	0	1.596	4	2.5	45	0	10	1	3	0	0	0	0	1	0	1	0	0	1	0	1	1	0	0	1	0.0397509	0	0	1	0
21074	2	2	209	24293	1012	0	0	0	0	1	3555	1	3.555	0	0	0	0.42	5	3	43	0	6	1	3	0	0	0	1	0	0	1	0	0	0	0	0	0	0	0	0	0.0397509	0	0	1	0
21075	2	2	209	24293	69	0	0	0	0	1	35372	1	35.372	0	0	0	1.512	8	3.9	69	0	7	1	3	0	0	0	0	0	1	1	0	0	0	0	1	1	0	0	1	0.0397509	0	0	1	0
21076	2	2	209	24293	69	0	0	0	0	1	40510	1	40.51	0	0	0	1.548	7	4	72	0	8	1	3	0	0	0	0	1	0	1	0	0	0	0	1	1	0	0	1	0.0397509	0	0	1	0
21077	2	2	209	24293	46	0	0	0	0	1	19380	1	19.38	3	1	0	0.756	5	3	46	0	8	1	3	0	0	0	0	1	0	1	0	0	0	0	1	0	0	0	0	0.0397509	0	0	1	0
21078	2	2	209	24293	46	0	0	0	0	1	37010	1	37.01	0	0	0	2.318	10	4.7	86	0	5	1	3	0	1	0	0	0	0	1	0	0	0	0	1	1	0	0	0	0.0397509	0	0	1	0
21079	2	2	209	24293	4968	1	0	0	0	0	incomplete data	0				0	0.84	9	4.4	60	0	6	1	3	0	0	0	0	0	1	1	0	0	0	0	1	1	0	0	0	0.0397509	0	1	0	1
21080	2	2	209	24293	184	0	0	0	0	1	7050	1	7.05	0	0	0	0.908	4	2.5	40	0	5	1	3	0	0	0	0	1	0	1	0	0	0	0	0	0	0	0	1	0.0397509	0	0	1	0
21081	2	2	209	24293	184	0	0	0	0	1	2375	1	2.375	4	1	0	2.011	12	6.1	51	0	13	1	3	0	0	0	0	1	0	1	0	0	0	0	0	0	0	0	1	0.0397509	0	0	1	0
21108	2	2	209	24299	3861	0	0	0	0	1	51240	1	51.24	0	0	0	0.42	4	2.1	38	0	7	1	3	1	0	0	0	1	0	1	0	0	0	0	0	0	0	0	0	0.0397509	0	0	1	0
21109	2	2	209	24299	117	1	0	0	0	0	777690	0		0	0	0	2.192	5	3	67	0	8	1	3	0	1	0	0	0	0	1	0	0	0	0	1	1	1	0	0	0.0397509	0	1	0	1
21110	2	2	209	24299	117	0	1	0	0	0	298500	1	298.5	0	0	0	1.412	7	4	80	0	1	1	3	0	1	0	0	0	0	1	0	0	0	0	0	1	0	0	0	0.0397509	0	0	1	0
21111	2	2	209	24299	1326	0	0	0	0	1	-120	1	-0.12	0	0	0	0.336	6	2.9	35	0	6	1	3	1	1	0	0	0	0	1	0	0	0	0	0	0	0	0	0	0.0397509	0	0	1	0
21112	2	2	209	24299	1326	0	1	0	0	0	31550	1	31.55	0	0	0	0.294	4	2.5	39	0	6	1	3	0	0	0	0	1	0	1	0	0	0	0	0	0	0	0	0	0.0397509	0	0	1	0
21113	2	2	209	24299	1326	0	1	0	0	0	incomplete data	0				0	0.756	2	1.5	53	1	1	1	3	0	0	0	0	0	0	1	0	0	0	0	0	0	0	0	0	0.0397509	0	1	0	1
21114	2	2	209	24299	234	0	1	0	0	0	-13800	1	-13.8	0	0	0	1.344	10	4.7	75	0	5	1	3	0	1	0	0	0	0	1	0	0	0	0	0	0	0	0	0	0.0397509	0	0	1	0
21115	2	2	209	24299	234	0	1	0	0	0	21600	1	21.6	0	0	0	1.468	11	5	55	0	6	1	3	0	1	0	0	0	0	1	0	0	0	0	0	0	0	0	0	0.0397509	0	0	1	0
20178	2	2	210	24140	275	0	0	1	0	0	-420	1	-0.42	0	0	0	0.048	6	3.1	60	0	5	1	3	0	0	0	0	1	0	1	0	0	0	0	0	0	0	0	1	0.122599	0	0	1	0
20179	2	2	210	24140	275	0	0	0	1	0	820	1	0.82	0	0	0	0.042	5	2.4	38	0	7	1	3	1	0	0	0	1	0	1	0	0	0	0	0	0	0	0	1	0.122599	0	0	1	0
20180	2	2	210	24140	25	0	0	0	1	0	48540	1	48.54	0	0	0	2.256	5	3	40	0	6	1	3	0	0	0	1	0	0	1	0	0	0	0	0	0	1	0	0	0.122599	0	0	1	0
20181	2	2	210	24140	25	0	0	0	1	0	41832	1	41.832	0	0	0	1.848	5	2.6	67	0	10	1	3	0	0	0	1	0	0	1	0	1	0	0	0	0	0	0	0	0.122599	0	0	1	0
20182	2	2	210	24140	37.5	0	0	0	1	0	37550	1	37.55	0	0	0	2.52	10	4.9	65	0	7	1	3	0	0	0	0	1	0	1	0	0	0	0	0	0	0	0	0	0.122599	0	0	1	0
20183	2	2	210	24140	37.5	0	0	0	1	0	10910	1	10.91	0	0	0	0.613	4	2.5	43	0	7	1	3	0	0	0	1	0	0	1	0	1	0	0	0	0	0	0	0	0.122599	0	0	1	0
20184	2	2	210	24140	37.5	0	0	0	1	0	7510	1	7.51	0	0	0	1.932	8	3.7	70	0	1	1	3	1	0	0	0	1	0	1	0	0	0	0	0	0	0	0	0	0.122599	0	0	1	0
20185	2	2	210	24140	37.5	0	0	0	1	0	14385	1	14.385	0	0	0	2.1	9	4.6	60	1	1	1	3	1	0	0	0	1	0	1	0	1	0	0	0	0	0	0	0	0.122599	0	0	1	0
20186	2	2	210	24141	3030	0	0	0	1	0	-763	1	-0.763	0	0	0	0.092	1	1	60	1	1	1	3	0	1	0	0	0	0	1	0	0	0	0	0	0	0	0	0	0.122599	0	0	1	0
20187	2	2	210	24141	909	0	0	0	1	0	85830	1	85.83	0	0	0	1.44	6	3.5	70	0	1	1	3	0	1	0	0	0	0	1	0	1	0	0	0	1	0	0	1	0.122599	0	0	1	0
20188	2	2	210	24141	202	0	0	0	1	0	160344	1	160.344	0	0	0	2.56	8	3.7	70	0	7	1	3	0	1	0	0	0	0	1	0	1	0	0	0	1	0	0	1	0.122599	0	0	1	0
20189	2	2	210	24141	202	0	0	0	1	0	145170	1	145.17	0	0	0	2.56	7	3.4	65	0	7	1	3	0	1	0	0	0	0	1	0	1	0	0	0	1	0	0	1	0.122599	0	0	1	0
20190	2	2	210	24141	202	0	0	0	1	0	54835	1	54.835	0	0	0	1.5	7	4	52	0	8	1	3	0	1	0	0	0	0	1	0	0	1	0	0	1	0	0	0	0.122599	0	0	1	0
20191	2	2	210	24141	4444	0	0	0	1	0	11685	1	11.685	0	0	0	0.83	6	3.3	69	0	1	1	3	0	1	0	0	0	0	1	0	0	0	0	1	0	0	0	1	0.122599	0	0	1	0
20192	2	2	210	24141	1212	0	0	0	1	0	20970	1	20.97	0	0	0	1.04	6	3.1	65	0	7	1	3	0	1	0	0	0	0	1	0	0	0	0	0	0	0	0	1	0.122599	0	0	1	0
20193	2	2	210	24141	202	1	0	0	0	0	54065	1	54.065	0	0	0	1.64	10	4.7	60	0	1	1	3	0	1	0	0	0	0	1	0	1	0	0	0	0	0	0	1	0.122599	0	0	1	0
20194	2	2	210	24142	307.5	0	0	0	0	1	1000	1	1	0	0	0	0.708	4	2.5	46	0	1	1	3	0	1	0	0	0	0	0	0	0	1	0	0	1	1	0	0	0.122599	0	0	1	0
20195	2	2	210	24142	307.5	0	0	0	0	1	19480	1	19.48	0	0	0	0.74	7	3.6	50	0	5	1	3	0	1	0	0	0	0	1	0	0	1	0	0	1	0	0	0	0.122599	0	0	1	0
20196	2	2	210	24142	307.5	0	0	0	0	1	76290	1	76.29	0	0	0	0.736	3	2	44	0	1	1	3	0	1	0	0	0	0	1	0	0	1	0	0	1	0	0	0	0.122599	0	0	1	0
20197	2	2	210	24142	307.5	0	0	0	0	1	106480	1	106.48	0	0	0	0.976	4	2.5	44	0	7	1	3	0	1	0	0	0	0	0	0	0	1	0	0	1	0	0	0	0.122599	0	0	1	0
20198	2	2	210	24142	307.5	0	0	0	0	1	20500	1	20.5	0	0	0	0.74	4	2.5	52	0	6	1	3	0	0	0	0	1	0	0	0	0	1	0	0	1	0	0	0	0.122599	0	0	1	0
20199	2	2	210	24142	307.5	0	0	0	0	1	129700	1	129.7	0	0	0	1.508	10	4.9	75	0	5	1	3	0	1	0	0	0	0	1	0	0	1	0	0	1	1	0	0	0.122599	0	0	1	0
20200	2	2	210	24142	307.5	0	0	0	0	1	164600	1	164.6	0	0	0	3.232	10	4.5	34	0	7	1	3	0	1	0	0	0	0	1	0	0	0	0	0	1	1	0	0	0.122599	0	0	1	0
20217	2	2	210	24145	572	0	0	0	0	1	24040	1	24.04	0	0	0	1.428	6	3.3	46	0	7	1	3	0	0	0	0	1	0	1	0	0	1	0	1	1	0	0	0	0.122599	0	0	1	0
20218	2	2	210	24145	572	1	0	0	0	0	3381	1	3.381	0	0	0	0.588	5	3	47	0	6	1	3	1	0	0	0	1	0	1	0	0	1	0	0	0	1	0	0	0.122599	0	0	1	0
20219	2	2	210	24145	572	0	0	0	0	1	10095	1	10.095	0	0	0	0.462	7	3.4	55	0	1	1	3	0	0	0	0	1	0	1	0	0	1	0	0	0	0	0	0	0.122599	0	0	1	0
20220	2	2	210	24145	2418	1	0	0	0	0	7070	1	7.07	0	0	0	0.672	14	6.7	60	0	1	1	3	0	0	0	0	1	0	1	0	0	1	0	0	0	1	0	0	0.122599	0	0	1	0
20221	2	2	210	24145	2418	1	0	0	0	0	3660	1	3.66	0	0	0	0.42	6	2.9	38	0	1	1	3	1	0	0	0	1	0	1	0	0	1	0	0	0	1	0	0	0.122599	0	0	1	0
20222	2	2	210	24145	156	0	0	0	0	1	-6320	1	-6.32	0	0	0	1.23	1	1	51	1	1	1	3	0	0	0	0	0	1	1	0	0	1	0	0	0	0	0	0	0.122599	0	0	1	0
20223	2	2	210	24145	156	1	0	0	0	0	9210	1	9.21	0	0	0	0.972	16	6.9	24	0	6	1	3	1	0	0	0	1	0	1	0	0	1	0	1	0	0	0	0	0.122599	0	0	1	0
20224	2	2	210	24145	156	0	0	0	0	1	8685	1	8.685	0	0	0	2.003	9	4.2	32	0	6	1	3	0	0	0	0	1	0	1	0	0	1	0	0	0	0	0	0	0.122599	0	0	1	0
20720	2	2	210	24234	1125	0	0	0	0	1	4575	1	4.575	0	0	0	0.42	3	2	35	1	6	1	3	0	0	0	0	0	1	1	0	0	0	0	0	0	0	0	0	0.122599	0	0	1	0
20721	2	2	210	24234	50	0	0	0	0	1	8525	1	8.525	0	0	0	1.008	10	4.1	40	0	7	1	3	0	1	0	0	0	0	1	0	0	0	0	0	0	1	0	0	0.122599	0	0	1	0
20722	2	2	210	24234	37.5	0	0	0	0	1	13270	1	13.27	0	0	0	2.184	7	4	48	0	1	1	3	0	0	0	0	1	0	1	0	0	0	0	0	0	0	0	0	0.122599	0	0	1	0
20723	2	2	210	24234	37.5	0	0	0	0	1	6220	1	6.22	0	0	0	2.016	8	4.5	50	0	1	1	3	0	1	0	0	0	0	1	0	0	0	0	0	1	0	0	0	0.122599	0	0	1	0
20724	2	2	210	24234	5250	1	0	0	0	0	11025	1	11.025	0	0	0	0.42	6	2.9	26	0	5	1	3	0	0	0	0	0	1	1	0	0	0	0	0	0	0	0	0	0.122599	0	0	1	0
20725	2	2	210	24234	175	1	0	0	0	0	5615	1	5.615	0	0	0	0.552	10	4.3	38	0	1	1	3	1	1	0	0	0	0	1	0	0	0	0	0	0	0	0	0	0.122599	0	0	1	0
20726	2	2	210	24234	175	1	0	0	0	0	16835	1	16.835	0	0	0	2.032	13	6	50	0	1	1	3	1	1	0	0	0	0	1	1	0	0	0	0	0	0	0	0	0.122599	0	0	1	0
20727	2	2	210	24234	175	1	0	0	0	0	15880	1	15.88	0	0	0	1.26	14	6.3	58	0	1	1	3	1	1	0	0	0	0	1	0	0	1	0	0	0	0	0	0	0.122599	0	0	1	0
21090	2	2	210	24296	307.5	0	0	0	0	1	-155375	0		2	1	0	25.488	10	5.5	48	1	8	1	3	0	1	0	0	0	0	1	0	0	1	0	0	1	0	0	0	0.122599	0	1	0	1
21091	2	2	210	24296	307.5	1	0	0	0	0	24600	1	24.6	0	0	0	0	4	2.3	65	0	5	0	3	1	1	0	0	0	0	1	1	0	0	0	0	0	1	0	0	0.122599	0	0	1	0
21092	2	2	210	24297	2121	0	0	0	0	1	14665	1	14.665	0	0	0	0.64	2	1.5	48	0	7	1	3	0	0	0	0	1	0	1	0	0	1	0	0	0	0	0	0	0.122599	0	0	1	0
21093	2	2	210	24297	2121	1	0	0	0	0	4094	1	4.094	0	0	0	0.24	6	2.9	52	0	1	1	3	0	0	0	0	1	0	1	0	0	1	0	0	0	1	0	0	0.122599	0	0	1	0
21094	2	2	210	24297	606	0	0	0	0	1	13455	1	13.455	0	0	0	0.16	5	2.4	36	0	10	0	3	0	0	0	0	1	0	1	0	0	1	0	0	0	1	0	0	0.122599	0	0	1	0
21095	2	2	210	24297	606	0	0	0	0	1	49935	1	49.935	0	0	0	1.2	5	2.4	37	0	10	1	3	0	1	0	0	0	0	1	0	0	1	0	0	0	0	0	0	0.122599	0	0	1	0
21096	2	2	210	24297	277.75	0	0	0	0	1	33615	1	33.615	0	0	0	5.6	4	2.5	50	0	7	1	3	0	1	0	0	0	0	1	0	0	1	0	0	0	1	0	0	0.122599	0	0	1	0
21097	2	2	210	24297	277.75	0	0	0	0	1	44380	1	44.38	0	0	0	5.44	3	2	49	0	1	1	3	1	1	0	0	0	0	1	0	0	1	0	0	0	0	0	0	0.122599	0	0	1	0
21098	2	2	210	24297	277.75	0	0	0	0	1	36330	1	36.33	0	0	0	6.4	11	5.8	46	0	7	1	3	0	1	0	0	0	0	1	0	0	1	0	0	0	1	0	0	0.122599	0	0	1	0
21099	2	2	210	24297	277.75	0	0	0	0	1	47155	1	47.155	0	0	0	5.6	5	3	60	0	8	1	3	0	1	0	0	0	0	1	0	0	1	0	0	0	1	0	0	0.122599	0	0	1	0
21100	2	2	210	24298	1144	1	0	0	0	0	3850	1	3.85	0	0	0	0.21	7	3.4	42	0	7	1	2	1	0	0	0	0	0	0	0	0	1	0	1	1	0	0	0	0.122599	0	0	1	0
21101	2	2	210	24298	832	0	0	0	0	1	57880	1	57.88	0	0	0	1.26	3	2	62	0	6	1	3	1	1	0	0	0	0	1	1	0	1	0	1	1	0	0	0	0.122599	0	0	1	0
21102	2	2	210	24298	364	0	0	0	0	1	14675	1	14.675	0	0	0	2.94	2	1.5	22	0	6	1	2	1	0	0	0	0	0	1	0	0	1	0	0	0	0	0	0	0.122599	0	0	1	0
21103	2	2	210	24298	364	0	0	0	0	1	40700	1	40.7	0	0	0	1.002	6	3.5	46	0	8	1	3	1	1	0	0	0	0	1	0	0	1	0	1	0	0	0	0	0.122599	0	0	1	0
21104	2	2	210	24298	3120	0	0	0	0	1	43870	1	43.87	0	0	0	0.294	5	2.6	32	0	12	1	3	0	1	0	0	0	0	1	1	0	1	0	1	0	0	0	0	0.122599	0	0	1	0
21105	2	2	210	24298	936	0	0	0	0	1	32010	1	32.01	0	0	0	1.008	4	2.3	42	0	13	1	3	1	1	0	0	0	0	1	0	0	1	0	1	0	0	0	0	0.122599	0	0	1	0
21106	2	2	210	24298	416	0	0	0	0	1	162775	1	162.775	0	0	0	2.1	12	5.3	35	0	7	1	3	1	1	0	0	0	0	1	0	0	1	0	1	1	0	0	0	0.122599	0	0	1	0
21107	2	2	210	24298	416	1	0	0	0	0	37160	1	37.16	4	1	0	0	5	3	44	0	1	0	3	0	1	0	0	0	0	1	0	0	1	0	1	1	0	0	0	0.122599	0	0	1	0
20201	2	2	211	24143	3890.5	0	0	0	0	1	27150	1	27.15	0	0	0	0.31	4	2.5	42	0	6	1	3	0	0	0	0	1	0	1	0	0	1	0	0	1	0	0	0	0.0645679	1	0	1	0
20202	2	2	211	24143	3890.5	0	0	0	0	1	incomplete data	0				0	0.21	4	2.5	49	0	8	1	3	0	0	1	0	0	0	1	0	0	1	0	0	1	0	0	0	0.0645679	0	1	0	1
20203	2	2	211	24143	376.5	0	0	0	0	1	-150	1	-0.15	0	0	0	1.344	3	1.8	40	0	6	1	2	0	0	0	0	1	0	1	0	0	0	0	0	0	0	0	0	0.0645679	1	0	1	0
20204	2	2	211	24143	376.5	0	0	0	0	1	-1550	1	-1.55	0	0	0	1.302	4	2.1	32	0	7	1	2	0	0	0	0	1	0	1	0	0	0	0	0	0	0	0	0	0.0645679	1	0	1	0
20205	2	2	211	24143	313.75	0	0	0	0	1	-850	1	-0.85	0	0	0	2.52	7	3.6	58	0	8	1	3	0	0	0	0	1	0	1	0	0	0	0	0	0	0	0	0	0.0645679	1	0	1	0
20206	2	2	211	24143	313.75	0	0	0	0	1	10900	1	10.9	0	0	0	0.42	4	2.5	52	0	8	1	3	0	0	0	0	1	0	1	0	0	0	0	1	0	0	0	0	0.0645679	1	0	1	0
20207	2	2	211	24143	313.75	0	0	0	0	1	38850	1	38.85	0	0	0	2.124	3	2	62	1	8	1	3	0	0	0	0	0	1	0	0	0	0	1	0	1	0	0	1	0.0645679	1	0	1	0
20208	2	2	211	24143	313.75	0	0	0	0	1	810	1	0.81	0	0	0	2.94	3	2	40	1	1	1	3	1	0	0	0	0	1	1	0	0	0	0	0	0	0	0	0	0.0645679	1	0	1	0
20225	2	2	211	24146	4182	0	0	0	0	1	217310	1	217.31	0	0	0	0.96	4	2.1	32	0	10	1	3	0	1	0	0	0	0	1	0	0	0	1	1	1	0	0	0	0.0645679	1	0	1	0
20226	2	2	211	24146	4182	0	0	0	0	1	-3980	1	-3.98	0	0	0	0.8	2	1.5	44	0	8	1	3	0	0	0	1	0	0	1	1	0	0	1	1	0	0	0	0	0.0645679	1	0	1	0
20227	2	2	211	24146	738	0	0	0	0	1	93150	1	93.15	0	0	0	1.76	6	3.3	70	0	1	1	3	0	1	0	0	0	0	0	1	0	0	1	1	0	0	0	0	0.0645679	1	0	1	0
20228	2	2	211	24146	738	0	0	0	0	1	54260	1	54.26	6	1	0	1.152	5	2.8	57	0	7	1	3	1	1	0	0	0	0	1	1	0	1	1	1	0	0	0	0	0.0645679	1	0	1	0
20229	2	2	211	24146	287	0	0	0	0	1	290200	1	290.2	0	0	0	4.42	6	3.1	52	0	7	1	3	0	0	0	0	1	0	0	1	0	1	1	1	0	0	0	0	0.0645679	1	0	1	0
20230	2	2	211	24146	287	0	0	0	0	1	5350	1	5.35	0	0	1	2.16	5	2.6	30	0	8	1	3	0	0	0	0	1	0	0	1	0	0	1	1	0	0	0	0	0.0645679	1	0	1	0
20231	2	2	211	24146	287	0	0	0	0	1	15890	1	15.89	0	0	0	2.24	5	3	39	0	8	1	3	0	1	0	0	0	0	0	1	0	1	1	1	1	0	0	0	0.0645679	1	0	1	0
20232	2	2	211	24146	287	0	0	0	0	1	330550	1	330.55	6	1	0	2.82	8	4.5	53	0	8	1	3	0	1	0	0	0	0	0	0	0	1	1	1	1	0	0	0	0.0645679	1	0	1	0
20233	2	2	211	24147	3344	0	0	0	0	1	328835	1	328.835	0	0	0	0.84	3	2	45	0	12	1	3	0	1	0	0	0	0	0	0	0	0	1	1	1	0	0	0	0.0645679	1	0	1	0
20234	2	2	211	24147	1672	0	0	0	0	1	870210	0		0	0	0	2.982	2	1.5	83	0	5	1	3	0	1	0	0	0	0	0	0	0	0	1	1	1	0	0	0	0.0645679	0	1	0	1
20235	2	2	211	24147	104.5	0	0	0	0	1	395145	1	395.145	0	0	0	2.52	4	2.5	72	0	12	1	3	0	1	0	0	0	0	0	0	0	0	1	1	1	0	0	0	0.0645679	1	0	1	0
20236	2	2	211	24147	4807	0	0	0	0	1	168510	1	168.51	9	1	0	0.42	3	2	58	0	8	1	3	0	1	0	0	0	0	0	0	0	0	1	0	1	0	0	0	0.0645679	1	0	1	0
20237	2	2	211	24147	1254	1	0	0	0	0	9180	1	9.18	0	0	0	0.42	3	2	67	0	1	1	3	1	1	0	0	0	0	0	0	0	0	1	0	1	0	0	0	0.0645679	1	0	1	0
20238	2	2	211	24147	1254	0	0	0	0	1	614455	0		0	0	0	1.26	3	2	78	0	5	1	3	0	1	0	0	0	0	0	0	0	0	1	1	1	0	0	0	0.0645679	0	1	0	1
20239	2	2	211	24147	209	0	0	0	0	1	1100000	0		11	1	0	2.342	4	2.5	50	0	12	1	3	0	1	0	0	0	0	0	0	0	0	1	0	1	0	0	0	0.0645679	0	1	0	1
20240	2	2	211	24147	209	0	0	0	0	1	314370	1	314.37	4	1	0	2.142	4	2.5	65	0	8	1	3	0	1	0	0	0	0	0	0	0	0	1	0	1	0	0	0	0.0645679	1	0	1	0
20241	2	2	211	24148	2830.5	0	0	0	0	1	53205	1	53.205	0	0	0	0.42	2	1.5	60	0	1	1	3	1	1	0	0	0	0	0	0	0	0	1	1	1	0	0	0	0.0645679	1	0	1	0
20242	2	2	211	24148	360.75	0	0	0	0	1	1200000	0		0	0	0	2.94	4	2.5	64	0	7	1	3	0	1	0	0	0	0	0	0	0	0	1	1	1	0	0	0	0.0645679	0	1	0	1
20243	2	2	211	24148	360.75	0	0	0	0	1	65150	1	65.15	0	0	0	1.12	2	1.5	70	0	1	1	3	1	1	0	0	0	0	0	0	0	0	1	0	1	0	0	0	0.0645679	1	0	1	0
20244	2	2	211	24148	4662	0	0	0	0	1	74130	1	74.13	0	0	0	0.504	7	3.8	47	0	8	1	3	0	1	0	0	0	0	0	0	0	0	1	1	0	0	0	0	0.0645679	1	0	1	0
20245	2	2	211	24148	333	0	0	0	0	1	78100	1	78.1	0	0	0	1.252	3	2	56	1	1	1	3	0	1	0	0	0	0	0	0	0	0	1	1	1	0	0	0	0.0645679	1	0	1	0
20246	2	2	211	24148	333	0	0	0	0	1	157400	1	157.4	0	0	0	1.36	4	2.5	56	0	6	1	3	0	1	0	0	0	0	0	0	0	0	1	0	1	0	0	0	0.0645679	1	0	1	0
20247	2	2	211	24148	111	0	0	0	0	1	1200000	0		0	0	0	2.312	6	3.1	65	0	8	1	3	0	1	0	0	0	0	0	1	0	0	1	0	1	0	0	0	0.0645679	0	1	0	1
20248	2	2	211	24148	111	0	0	0	0	1	453250	1	453.25	0	0	0	3.22	8	4.1	38	0	13	1	3	0	1	0	0	0	0	0	0	0	0	1	0	1	0	0	0	0.0645679	1	0	1	0
20249	2	2	211	24149	882	0	0	0	0	1	96380	1	96.38	0	0	0	0.528	10	5.3	70	0	5	1	3	1	1	0	0	0	0	0	1	0	0	0	0	1	0	0	0	0.0645679	1	0	1	0
20250	2	2	211	24149	882	0	0	0	0	1	142000	1	142	0	0	0	0.528	9	4.4	55	0	7	1	3	1	1	0	0	0	0	0	0	0	0	0	0	1	0	0	0	0.0645679	1	0	1	0
20251	2	2	211	24149	882	0	0	0	0	1	43050	1	43.05	0	0	0	0	4	2.3	35	0	5	0	3		1	0	0	0	0	0	0	0	0	0	0	1	0	0	0	0.0645679	1	0	1	0
20252	2	2	211	24149	882	0	0	0	0	1	55400	1	55.4	0	0	0	0	6	2.7	31	0	5	0	3		1	0	0	0	0	0	0	0	0	0	0	1	0	0	0	0.0645679	1	0	1	0
20253	2	2	211	24149	882	0	0	0	0	1	76150	1	76.15	0	0	0	5.272	4	2.5	43	0	8	1	3	0	1	0	0	0	0	1	0	0	0	0	0	1	0	0	0	0.0645679	1	0	1	0
20688	2	2	211	24230	4180	0	0	0	0	1	174600	1	174.6	0	0	0	0.798	8	4.3	52	0	7	1	3	1	1	0	0	0	0	0	0	0	0	1	1	1	0	0	0	0.0645679	1	0	1	0
20689	2	2	211	24230	731.5	0	0	0	0	1	343000	1	343	0	0	0	1.722	2	1.5	55	0	6	1	3	0	0	0	0	0	0	0	0	0	0	1	1	1	0	0	0	0.0645679	1	0	1	0
20690	2	2	211	24230	104.5	0	0	0	0	1	254200	1	254.2	0	0	0	2.216	3	2	43	0	8	1	3	0	1	0	0	0	0	0	0	0	0	1	0	1	0	0	0	0.0645679	1	0	1	0
20691	2	2	211	24230	104.5	0	0	0	0	1	3100000	0		0	0	0	3.182	6	3.3	60	0	8	1	3	1	0	0	0	0	0	0	0	0	0	1	1	1	0	0	0	0.0645679	0	1	0	1
20692	2	2	211	24230	8151	1	0	0	0	0	147100	1	147.1	0	0	0	0.294	5	3	50	0	6	1	3	1	0	0	0	0	0	0	0	0	0	1	0	1	0	0	0	0.0645679	1	0	1	0
20693	2	2	211	24230	836	1	0	0	0	0	39520	1	39.52	0	0	0	1.008	4	2.5	59	1	1	1	3	0	1	0	0	0	0	0	0	0	0	1	1	1	0	0	0	0.0645679	1	0	1	0
20694	2	2	211	24230	836	0	0	0	0	1	37460	1	37.46	0	0	0	2.604	1	1	72	0	7	1	3	0	1	0	0	0	0	0	0	0	0	1	1	0	0	0	0	0.0645679	1	0	1	0
20695	2	2	211	24230	209	0	0	0	0	1	440100	1	440.1	0	0	0	2.978	6	3.5	50	0	7	1	3	0	0	1	0	0	0	0	0	0	0	1	1	1	0	0	0	0.0645679	1	0	1	0
20696	2	2	211	24231	4016	0	0	0	0	1	26710	1	26.71	0	0	0	0.48	3	2	48	0	5	1	3	1	1	0	0	0	0	1	0	0	0	1	0	0	0	0	0	0.0645679	1	0	1	0
20697	2	2	211	24231	4016	0	0	0	0	1	50500	1	50.5	0	0	0	0.312	6	3.3	45	0	7	1	3	0	1	0	0	0	0	1	1	0	0	1	0	0	0	0	0	0.0645679	1	0	1	0
20698	2	2	211	24231	334.67	0	0	0	0	1	-2380	1	-2.38	0	0	0	1.2	6	3.3	70	0	6	1	3	1	1	0	0	0	0	1	0	0	0	1	0	0	0	0	0	0.0645679	1	0	1	0
20699	2	2	211	24231	334.67	0	0	0	0	1	111450	1	111.45	0	0	0	1.35	5	2.4	29	0	8	1	3	1	1	0	0	0	0	1	0	0	0	1	0	0	0	0	0	0.0645679	1	0	1	0
20700	2	2	211	24231	334.67	0	0	0	0	1	34100	1	34.1	0	0	0	1.12	7	3.6	60	0	5	1	3	0	1	0	0	0	0	1	1	0	0	1	1	0	0	0	0	0.0645679	1	0	1	0
20701	2	2	211	24231	334.67	0	0	0	0	1	49395	1	49.395	0	0	0	1.28	6	3.1	28	0	8	1	3	0	1	0	0	0	0	1	1	0	0	1	1	0	0	0	0	0.0645679	1	0	1	0
20702	2	2	211	24231	334.67	0	0	0	0	1	42550	1	42.55	0	0	0	1.2	4	2.5	56	0	1	1	3	1	1	0	0	0	0	1	1	0	0	1	0	0	0	0	0	0.0645679	1	0	1	0
20703	2	2	211	24231	334.67	0	0	0	0	1	75050	1	75.05	0	0	0	2.08	3	1.8	35	0	8	1	3	0	1	0	0	0	0	0	1	0	1	1	0	0	0	0	0	0.0645679	1	0	1	0
20704	2	2	211	24232	2205	1	0	0	0	0	2015	1	2.015	0	0	0	0.6	5	2.6	65	0	8	1	3	0	0	0	0	1	0	1	0	0	0	0	1	0	1	0	0	0.0645679	1	0	1	0
20705	2	2	211	24232	2205	1	0	0	0	0	-750	1	-0.75	0	0	0	0.4	4	2.5	45	0	1	1	3	0	0	0	0	1	0	1	0	0	0	0	1	0	1	0	0	0.0645679	1	0	1	0
20706	2	2	211	24232	1176	1	0	0	0	0	550	1	0.55	0	0	0	1.226	6	3.5	68	0	1	1	3	0	0	0	0	1	0	1	0	0	1	0	1	1	1	0	0	0.0645679	1	0	1	0
20707	2	2	211	24232	1176	1	0	0	0	0	-342	1	-0.342	0	0	0	1.28	7	3.4	56	0	1	1	3	0	0	0	0	1	0	1	0	0	1	0	1	0	1	0	0	0.0645679	1	0	1	0
20708	2	2	211	24232	1176	1	0	0	0	0	1525	1	1.525	0	0	0	1.2	8	4.5	74	0	1	1	3	0	0	0	0	1	0	1	1	0	1	0	1	0	1	0	0	0.0645679	1	0	1	0
20709	2	2	211	24232	882	0	0	0	0	1	-25850	0		0	0	0	1.008	6	3.1	39	0	10	1	3	0	0	0	0	1	0	0	0	0	1	0	1	0	1	0	0	0.0645679	0	1	0	1
20710	2	2	211	24232	882	0	0	0	0	1	13570	1	13.57	0	0	0	0	3	2	55	0	1	1	3	0	0	0	0	1	0	1	1	0	1	0	0	0	0	0	0	0.0645679	1	0	1	0
20711	2	2	211	24232	882	0	0	0	0	1	4600	1	4.6	0	0	0	2.08	4	2.3	40	0	1	1	3	0	0	0	0	1	0	1	0	0	1	0	1	0	0	0	0	0.0645679	1	0	1	0
20728	2	2	211	24235	4756	1	0	0	0	0	250	1	0.25	0	0	0	0.42	5	2.8	76	1	1	1	3	0	0	0	0	0	1	0	1	0	0	1	0	1	0	0	0	0.0645679	1	0	1	0
20729	2	2	211	24235	4756	1	0	0	0	0	200	1	0.2	0	0	0	0.84	5	2.6	30	0	7	1	3	0	0	0	0	0	0	0	1	0	0	1	0	1	0	0	0	0.0645679	1	0	1	0
20730	2	2	211	24235	524.8	0	0	0	0	1	123950	1	123.95	0	0	0	1.68	2	1.5	58	0	8	1	3	0	1	0	0	0	0	1	0	0	0	1	1	1	0	0	0	0.0645679	1	0	1	0
20731	2	2	211	24235	524.8	0	0	0	0	1	31158	1	31.158	0	0	0	1.68	5	2.6	69	0	5	1	3	0	0	0	0	0	1	1	0	0	0	1	1	1	0	0	0	0.0645679	1	0	1	0
20732	2	2	211	24235	524.8	0	0	0	0	1	551500	1	551.5	0	0	0	2.52	2	1.5	52	0	13	1	3	0	0	0	0	0	0	1	0	0	0	1	1	1	0	0	0	0.0645679	1	0	1	0
20733	2	2	211	24235	524.8	0	0	0	0	1	41530	1	41.53	0	0	0	1.176	5	2.6	36	1	7	1	3	0	1	0	0	0	0	1	0	0	0	1	0	1	0	0	0	0.0645679	1	0	1	0
20734	2	2	211	24235	524.8	0	0	0	0	1	132750	1	132.75	0	0	0	1.008	4	2.5	57	0	8	1	3	0	1	0	0	0	0	1	0	0	1	1	1	1	0	0	0	0.0645679	1	0	1	0
20735	2	2	211	24235	164	0	0	0	0	1	62802	1	62.802	0	0	0	5.944	6	3.3	76	0	6	1	3	0	1	0	0	0	0	1	1	0	0	1	0	1	0	0	0	0.0645679	1	0	1	0
20752	2	2	211	24239	1017.5	1	0	0	0	0	21820	1	21.82	0	0	0	0.32	4	2.1	35	0	10	1	3	0	1	0	0	0	0	1	1	0	0	1	0	1	0	0	0	0.0645679	1	0	1	0
20753	2	2	211	24239	1017.5	1	0	0	0	0	13135	1	13.135	0	0	0	0.12	2	1.5	58	0	1	1	3	1	1	0	0	0	0	1	0	0	0	1	0	1	0	0	0	0.0645679	1	0	1	0
20754	2	2	211	24239	1017.5	0	0	0	0	1	613120	0		0	0	0	1.6	8	4.1	56	0	8	1	3	0	1	0	0	0	0	1	1	0	0	1	0	0	0	0	0	0.0645679	0	1	0	1
20755	2	2	211	24239	55.5	0	0	0	0	1	1300000	0		0	0	0	2.42	12	6.1	75	0	10	1	3	0	1	0	0	0	0	1	1	0	0	1	0	0	0	0	0	0.0645679	0	1	0	1
20756	2	2	211	24239	55.5	0	0	0	0	1	94150	1	94.15	0	0	0	1.52	3	2	70	0	6	1	3	0	1	0	0	0	0	1	0	0	0	1	0	0	0	0	0	0.0645679	1	0	1	0
20757	2	2	211	24239	2220	1	0	0	0	0	24645	1	24.645	0	0	0	0.4	4	2.1	36	0	13	1	3	0	0	0	0	1	0	1	1	0	0	1	0	1	0	0	0	0.0645679	1	0	1	0
20758	2	2	211	24239	2220	1	0	0	0	0	58425	1	58.425	0	0	0	0.24	4	2.5	45	0	6	1	3	1	1	0	0	0	0	1	0	0	0	1	0	0	0	0	0	0.0645679	1	0	1	0
20759	2	2	211	24239	2220	1	0	0	0	0	47300	1	47.3	0	0	0	0.16	5	2.6	55	0	1	1	3	1	1	0	0	0	0	0	1	0	0	1	0	1	0	0	0	0.0645679	1	0	1	0
20712	2	2	212	24233	6270	0	1	0	0	0	82500	1	82.5	0	0	0	0.32	1	1	67	1	1	1	2	0	1	0	0	0	0	1	0	0	0	1	0	0	0	0	0	0	0	1	1	0
20713	2	2	212	24233	6270	1	0	0	0	0	58800	1	58.8	0	0	0	0.2	1	1	57	0	1	1	2	0	1	0	0	0	0	1	0	0	0	1	0	0	0	0	0	0	0	1	1	0
20714	2	2	212	24233	6270	0	1	0	0	0	621950	0		0	0	0	0.56	5	2.8	40	0	10	1	3	0	1	0	0	0	0	0	0	0	0	1	0	1	0	0	0	0	0	1	0	1
20715	2	2	212	24233	6270	0	1	0	0	0	204150	1	204.15	0	0	0	0.64	2	1.5	48	1	1	1	3	0	1	0	0	0	0	1	0	0	0	1	0	1	0	0	0	0	0	1	1	0
20716	2	2	212	24233	6270	0	1	0	0	0	47205	1	47.205	0	0	0	0.176	4	2.3	34	1	7	1	3	0	1	0	0	0	0	0	0	0	0	1	0	0	0	0	0	0	0	1	1	0
20717	2	2	212	24233	330	0	1	0	0	0	194880	1	194.88	0	0	0	1.024	10	5.1	60	0	5	1	3	1	1	0	0	0	0	1	0	0	0	1	0	1	0	0	0	0	0	1	1	0
20718	2	2	212	24233	330	0	1	0	0	0	1100000	0		0	0	0	2.98	4	2.5	60	0	8	1	3	0	1	0	0	0	0	1	0	0	0	1	0	1	0	0	0	0	0	1	0	1
20719	2	2	212	24233	330	0	1	0	0	0	11000000	0		4	1	0	12.8	6	3.5	72	0	8	1	3	0	1	0	0	0	0	0	0	0	0	1	0	1	0	0	0	0	0	1	0	1
20035	2	3	301	24101	9020	0	0	0	0	1	incomplete data	0				0	0.007	6	3.3	60	0	1	1	2	1	0	0	0	1	0	1	0	0	0	0	0	0	0	0	1	0.0832883	0	1	0	1
20036	2	3	301	24101	9020	0	0	0	0	1	804100	0		0	0	0	0.809	6	3.5	63	0	8	1	3	0	1	0	0	0	0	1	0	0	0	0	0	0	0	0	0	0.0832883	0	1	0	1
20037	2	3	301	24101	1435	0	0	0	0	1	2600000	0		0	0	0	2.428	6	3.1	25	0	7	1	3	0	0	0	0	0	0	1	0	0	0	0	0	0	1	0	1	0.0832883	0	1	0	1
20038	2	3	301	24101	1435	0	0	0	0	1	1300000	0		0	0	0	1.214	3	2	20	0	10	1	3	0	1	0	0	0	0	1	0	0	0	0	0	0	0	0	1	0.0832883	0	1	0	1
20039	2	3	301	24101	922.5	0	0	0	0	1	337500	1	337.5	0	0	0	4.247	4	2.5	48	0	6	1	3	0	1	0	0	0	0	1	0	0	0	0	0	0	0	0	1	0.0832883	1	0	1	0
20040	2	3	301	24101	922.5	0	0	0	0	1	-42350	0		0	0	0	4.856	17	7.4	60	1	6	1	3	0	0	0	0	1	0	1	0	0	0	0	0	0	0	0	1	0.0832883	0	1	0	1
20041	2	3	301	24101	922.5	0	0	0	0	1	197350	1	197.35	0	0	0	2.63	6	3.5	70	0	7	1	3	0	1	0	0	0	0	1	0	0	0	0	0	0	0	0	1	0.0832883	1	0	1	0
20042	2	3	301	24101	922.5	0	0	0	0	1	1800000	0		0	0	0	3	3	2	68	0	8	1	3	0	0	0	0	0	1	1	0	0	0	0	0	0	1	0	1	0.0832883	0	1	0	1
20043	2	3	301	24102	416.25	1	0	0	0	0	incomplete data	0				1	0.004	5	2.4	40	0	8	1	3	0	0	0	0	1	0	1	0	0	0	0	0	0	1	0	1	0.0832883	0	1	0	1
20044	2	3	301	24102	416.25	1	0	0	0	0	incomplete data	0				1	0.004	5	2.8	46	0	6	1	3	1	0	1	0	0	0	1	0	0	0	0	0	0	1	0	1	0.0832883	0	1	0	1
20045	2	3	301	24102	4162.5	0	0	0	0	1	41850	1	41.85	0	0	0	0.632	6	3.1	58	0	8	1	3	0	1	0	0	0	0	1	0	0	0	0	0	0	0	0	0	0.0832883	1	0	1	0
20046	2	3	301	24102	4162.5	1	0	0	0	0	incomplete data	0				1	0.01	6	3.1	65	0	1	1	3	1	0	0	0	0	1	1	0	0	0	0	0	0	0	0	0	0.0832883	0	1	0	1
20047	2	3	301	24102	485.63	0	0	0	0	1	59920	1	59.92	0	0	0	1.224	6	2.9	80	0	1	1	3	0	1	0	0	0	0	1	0	0	0	0	0	0	0	0	1	0.0832883	1	0	1	0
20048	2	3	301	24102	485.63	0	0	0	0	1	109700	1	109.7	0	0	0	1.264	4	2.5	55	0	10	1	3	0	1	0	0	0	0	1	0	0	0	0	0	0	0	0	1	0.0832883	1	0	1	0
20049	2	3	301	24102	485.63	0	0	0	0	1	161310	1	161.31	0	0	0	1.643	5	2.8	60	0	7	1	3	0	1	0	0	0	0	1	0	0	0	0	0	0	0	0	1	0.0832883	1	0	1	0
20050	2	3	301	24102	485.63	1	0	0	0	0	26055	1	26.055	0	0	0	1.15	6	3.1	65	0	6	1	3	0	1	0	0	0	0	1	0	0	0	0	0	0	0	0	1	0.0832883	1	0	1	0
20059	2	3	301	24105	1044	0	0	0	1	0	incomplete data	0				1	0.004	2	1.5	57	0	8	1	3	0	0	1	0	0	0	1	0	0	0	0	0	0	0	0	1	0.0832883	0	1	0	1
20060	2	3	301	24105	7830	0	0	0	0	1	77800	1	77.8	0	0	0	0.883	6	3.1	69	0	8	1	3	0	1	0	0	0	0	1	0	0	0	0	0	0	0	0	1	0.0832883	1	0	1	0
20061	2	3	301	24105	1566	0	0	0	0	1	120500	1	120.5	0	0	0	1.628	4	2.1	35	0	12	1	3	0	0	0	0	1	0	1	0	0	0	0	0	0	0	0	1	0.0832883	1	0	1	0
20062	2	3	301	24105	1566	1	0	0	0	0	incomplete data	0				0	0.004	6	3.3	38	0	1	1	3	1	0	1	0	0	0	1	0	0	0	0	0	0	0	0	1	0.0832883	0	1	0	1
20063	2	3	301	24105	14094	0	0	0	0	1	10280	1	10.28	0	0	0	0.12	4	2.5	58	0	8	1	3	1	0	0	0	0	1	1	0	0	0	0	0	0	0	0	0	0.0832883	1	0	1	0
20064	2	3	301	24105	2610	0	0	0	0	1	266150	1	266.15	0	0	0	2.051	5	3	45	0	10	1	3	1	0	0	0	1	0	1	0	0	0	0	0	0	0	0	0	0.0832883	1	0	1	0
20065	2	3	301	24105	4959	0	0	0	0	1	120300	1	120.3	0	0	0	1.831	3	2	39	0	13	1	1	0	1	0	0	0	0	1	0	0	0	0	0	0	0	0	0	0.0832883	1	0	1	0
20162	2	3	301	24138	277.5	1	0	0	0	0	incomplete data	0				1	0.003	8	4.3	50	0	8	1	3		0	1	0	0	0	1	0	0	0	0	0	0	0	0	1	0.0832883	0	1	0	1
20163	2	3	301	24138	3191.25	0	0	0	0	1	207000	1	207	0	0	0	0.546	5	2.6	63	0	7	1	3	0	1	0	0	0	0	1	0	1	0	0	0	0	0	0	1	0.0832883	1	0	1	0
20164	2	3	301	24138	3191.25	0	0	0	0	1	incomplete data	0				1	0.007	4	1.9	31	1	8	1	3		0	0	0	0	1	1	0	1	0	0	0	0	0	0	1	0.0832883	0	1	0	1
20165	2	3	301	24138	346.88	0	0	0	0	1	448780	1	448.78	8	1	0	1.648	5	3	42	0	8	1	3	0	0	0	0	1	0	1	0	1	0	0	0	0	0	0	0	0.0832883	1	0	1	0
20166	2	3	301	24138	346.88	0	0	0	0	1	353000	1	353	0	0	0	1.234	8	4.5	49	0	8	1	3	1	1	0	0	0	0	1	0	1	0	0	0	0	0	0	1	0.0832883	1	0	1	0
20167	2	3	301	24138	346.88	0	0	0	0	1	304300	1	304.3	0	0	0	1.214	4	2.1	42	0	8	1	3	0	1	0	0	0	0	1	0	1	0	0	0	0	0	0	1	0.0832883	1	0	1	0
20168	2	3	301	24138	346.88	0	0	0	0	1	67280	1	67.28	0	0	0	1.234	2	1.5	55	0	7	1	3	1	1	0	0	0	0	1	0	0	0	0	0	0	0	0	1	0.0832883	1	0	1	0
20169	2	3	301	24138	277.5	0	0	0	0	1	508690	1	508.69	0	0	0	2.428	5	2.6	55	0	12	1	3	0	1	0	0	0	0	1	0	1	0	0	0	0	0	0	1	0.0832883	1	0	1	0
20270	2	3	301	24162	652.5	0	0	0	0	1	incomplete data	0				1	0.005	5	3	65	0	7	1	3	0	0	0	0	1	0	1	0	0	0	0	0	0	0	0	1	0.0832883	0	1	0	1
20271	2	3	301	24162	652.5	1	0	0	0	0	incomplete data	0				1	0.003	2	1.5	68	0	1	1	3	0	0	0	0	0	0	1	0	0	0	0	0	0	0	0	1	0.0832883	0	1	0	1
20272	2	3	301	24162	8221.5	1	0	0	0	0	incomplete data	0				1	0.02	6	3.3	70	0	1	1	3	1	0	0	0	1	0	1	0	0	0	0	0	0	0	0	1	0.0832883	0	1	0	1
20273	2	3	301	24162	8221.5	0	0	0	0	1	148230	1	148.23	0	0	0	0.416	3	2	78	0	12	1	3	0	1	0	0	0	0	1	0	0	0	0	0	0	0	0	1	0.0832883	1	0	1	0
20274	2	3	301	24162	391.5	0	0	0	0	1	27190	1	27.19	0	0	0	1.264	2	1.5	55	0	7	1	3	0	0	0	0	1	0	1	0	0	0	0	0	0	1	0	1	0.0832883	1	0	1	0
20275	2	3	301	24162	391.5	0	0	0	0	1	182650	1	182.65	4	1	0	1.858	6	3.5	57	0	8	1	3	0	1	0	0	0	0	1	0	0	0	0	0	0	1	0	1	0.0832883	1	0	1	0
20276	2	3	301	24162	1435.5	0	0	0	0	1	250710	1	250.71	0	0	0	2.428	7	3.6	65	0	6	1	3	0	1	0	0	0	0	1	0	0	0	0	0	0	0	0	0	0.0832883	1	0	1	0
20277	2	3	301	24162	1435.5	0	0	0	0	1	527300	1	527.3	0	0	0	2.428	3	1.8	28	0	8	1	3	0	1	0	0	0	0	1	0	1	0	0	0	0	0	0	1	0.0832883	1	0	1	0
20286	2	3	301	24164	512.5	0	0	0	1	0	incomplete data	0				1	0.003	3	2	65	0	1	1	1	0	0	0	0	1	0	1	0	0	0	0	0	0	0	0	1	0.0832883	0	1	0	1
20287	2	3	301	24164	512.5	1	0	0	0	0	incomplete data	0				1	0.003	6	3.1	50	0	1	1	3	1	0	0	0	1	0	1	0	0	0	0	0	0	0	0	1	0.0832883	0	1	0	1
20288	2	3	301	24164	5842.5	1	0	0	0	0	incomplete data	0				1	0.027	6	3.3	65	0	1	1	3	0	0	0	0	1	0	1	0	0	0	0	0	0	0	0	1	0.0832883	0	1	0	1
20289	2	3	301	24164	5842.5	1	0	0	0	0	incomplete data	0				1	0.014	6	3.5	65	0	1	1	3		0	0	0	1	0	1	0	0	0	0	0	0	0	0	1	0.0832883	0	1	0	1
20290	2	3	301	24164	1435	0	0	0	0	1	152595	1	152.595	0	0	0	1.446	6	3.1	70	0	1	1	3	0	1	0	0	0	0	1	0	0	0	0	0	0	0	0	1	0.0832883	1	0	1	0
20291	2	3	301	24164	1435	0	0	0	0	1	265100	1	265.1	4	1	0	2.023	5	3	50	0	5	1	3	0	1	0	0	0	0	1	0	0	0	0	0	0	0	0	1	0.0832883	1	0	1	0
20292	2	3	301	24164	205	0	1	0	0	0	610425	0		4	1	0	3.237	4	2.3	30	0	7	1	3	0	1	0	0	0	0	1	0	0	0	0	0	0	0	0	1	0.0832883	0	1	0	1
20293	2	3	301	24164	205	0	0	0	0	1	241100	1	241.1	0	0	0	2.438	6	3.1	55	0	8	1	3	0	1	0	0	0	0	1	0	0	0	0	0	0	0	0	1	0.0832883	1	0	1	0
20027	2	3	302	24100	226	1	0	0	0	0	incomplete data	0				1	0.037	6	3.3	50	0	1	1	3		0	1	0	0	0	1	0	0	0	0	0	0	1	0	1	0.386675	0	1	0	1
20028	2	3	302	24100	10735	0	0	0	0	1	43200	1	43.2	0	0	0	0.454	5	3	70	0	5	1	3		0	0	0	1	0	0	0	0	0	0	0	0	0	0	1	0.386675	1	0	1	0
20029	2	3	302	24100	3955	0	0	0	0	1	155880	1	155.88	0	0	0	1.685	4	2.5	30	0	12	1	3	0	1	0	0	0	0	1	0	0	0	0	0	0	0	0	1	0.386675	1	0	1	0
20030	2	3	302	24100	3955	0	0	0	0	1	110680	1	110.68	0	0	0	0.457	4	2.5	45	0	1	1	2	0	1	0	0	0	0	1	0	0	0	0	0	0	0	0	1	0.386675	1	0	1	0
20031	2	3	302	24100	706.25	0	0	0	0	1	439956	1	439.956	0	0	0	3.717	14	6.9	55	0	5	1	3	0	1	0	0	0	0	1	0	0	0	0	0	0	0	0	1	0.386675	1	0	1	0
20032	2	3	302	24100	706.25	0	0	0	0	1	498420	1	498.42	0	0	0	4.077	12	5.5	36	0	12	1	3		1	0	0	0	0	1	0	0	0	0	0	0	0	0	1	0.386675	1	0	1	0
20033	2	3	302	24100	706.25	0	0	0	0	1	294520	1	294.52	4	1	0	3.085	7	3.4	53	0	8	1	3	0	1	0	0	0	0	1	0	0	0	0	0	0	0	0	1	0.386675	1	0	1	0
20034	2	3	302	24100	706.25	0	0	0	0	1	210150	1	210.15	0	0	0	0.694	8	4.3	72	0	1	1	3	0	1	0	0	0	0	1	0	0	0	0	0	0	0	0	1	0.386675	1	0	1	0
20051	2	3	302	24103	81.5	1	0	0	0	0	incomplete data	0				1	0.003	5	2.4	38	0	1	1	3	0	0	1	0	0	0	1	0	0	0	0	0	0	0	0	1	0.386675	0	1	0	1
20052	2	3	302	24103	2608	0	0	0	0	1	6130	1	6.13	0	0	0	0.06	5	2.8	45	0	1	1	3	0	1	0	0	0	0	0	0	0	0	0	0	0	0	0	1	0.386675	1	0	1	0
20053	2	3	302	24103	326	0	0	0	0	1	266980	1	266.98	0	0	0	1.681	6	3.3	48	0	1	1	3	0	1	0	0	0	0	1	0	0	0	0	0	0	0	0	1	0.386675	1	0	1	0
20054	2	3	302	24103	326	0	0	0	0	1	291600	1	291.6	4	1	0	2.842	5	3	60	0	8	1	3	0	1	0	0	0	0	1	0	0	0	0	0	0	0	0	1	0.386675	1	0	1	0
20055	2	3	302	24103	8557.5	0	0	0	0	1	incomplete data	0				1	0.01	5	2.6	70	1	1	1	3	0	0	1	0	0	0	1	0	0	0	0	0	0	0	0	1	0.386675	0	1	0	1
20056	2	3	302	24103	2934	0	0	0	0	1	548400	1	548.4	0	0	0	2.148	2	1.5	52	1	1	1	3	0	1	0	0	0	0	1	0	0	0	0	0	0	0	0	1	0.386675	1	0	1	0
20057	2	3	302	24103	1222.5	0	0	0	0	1	251200	1	251.2	0	0	0	2.842	5	3	55	0	8	1	3	0	1	0	0	0	0	1	0	0	0	0	0	0	0	0	1	0.386675	1	0	1	0
20058	2	3	302	24103	1222.5	0	0	0	0	1	374800	1	374.8	0	0	0	4.5	10	4.7	68	0	8	1	3	0	1	0	0	0	0	1	0	0	0	0	0	0	0	0	1	0.386675	1	0	1	0
20090	2	3	302	24109	3432	0	0	0	0	1	37010	1	37.01	6	1	0	0.607	5	2.8	66	0	6	1	3	0	1	0	0	0	0	1	0	0	0	0	0	0	0	0	1	0.386675	1	0	1	0
20091	2	3	302	24109	3432	0	0	0	0	1	45518	1	45.518	0	0	0	0.432	4	2.5	55	0	10	1	3	0	1	0	0	0	0	1	0	0	0	0	0	0	0	0	1	0.386675	1	0	1	0
20092	2	3	302	24109	1482	0	0	0	0	1	26060	1	26.06	0	0	0	0.504	4	2.3	42	0	6	1	3	0	1	0	0	0	0	1	0	0	0	0	0	0	0	0	1	0.386675	1	0	1	0
20093	2	3	302	24109	1482	0	0	0	0	1	258090	1	258.09	0	0	0	1.036	6	3.3	62	0	6	1	3	0	1	0	0	0	0	1	0	0	0	0	0	1	0	0	1	0.386675	1	0	1	0
20094	2	3	302	24109	819	0	0	0	0	1	135040	1	135.04	0	0	0	3.892	4	2.1	50	0	6	1	3	0	1	0	0	0	0	1	0	0	0	0	0	0	0	0	1	0.386675	1	0	1	0
20095	2	3	302	24109	819	0	0	0	0	1	159240	1	159.24	0	0	0	1.668	4	2.5	75	0	1	1	3	0	1	0	0	0	0	1	0	0	0	0	0	0	0	0	1	0.386675	1	0	1	0
20096	2	3	302	24109	819	0	0	0	0	1	75440	1	75.44	0	0	0	2.023	4	2.5	75	0	7	1	3	0	1	0	0	0	0	1	0	0	0	0	0	0	0	0	1	0.386675	1	0	1	0
20097	2	3	302	24109	819	0	0	0	0	1	248300	1	248.3	0	0	0	0.809	4	2.1	35	0	10	1	3		1	0	0	0	0	1	0	0	0	0	0	0	0	0	1	0.386675	1	0	1	0
20254	2	3	302	24160	2526.5	1	0	0	0	0	incomplete data	0				0	0.01	10	4.7	70	0	1	1	3	0	0	1	0	0	0	1	0	0	0	0	0	1	0	0	0	0.386675	0	1	0	1
20255	2	3	302	24160	326	0	0	0	0	1	130260	1	130.26	0	0	0	1.036	4	2.5	66	0	6	1	3	0	1	0	0	0	0	1	0	0	0	0	0	0	0	0	1	0.386675	1	0	1	0
20256	2	3	302	24160	326	0	0	0	0	1	194380	1	194.38	0	0	0	0.814	5	2.4	35	0	10	1	3	0	1	0	0	0	0	1	0	0	0	0	0	0	0	0	1	0.386675	1	0	1	0
20257	2	3	302	24160	326	0	0	0	0	1	1100000	0		0	0	0	0.619	5	3	44	0	12	1	3	0	1	0	0	0	0	1	0	0	0	0	0	0	0	0	1	0.386675	0	1	0	1
20258	2	3	302	24160	244.5	1	0	0	0	0	incomplete data	0				0	0.002	5	2.4	35	0	1	1	3		0	1	0	0	0	1	0	0	0	0	0	0	0	0	1	0.386675	0	1	0	1
20259	2	3	302	24160	1956	0	0	0	0	1	25830	1	25.83	0	0	0	0.313	6	3.3	65	0	8	1	3	0	1	0	0	0	0	1	0	0	0	0	0	0	0	0	1	0.386675	1	0	1	0
20260	2	3	302	24160	978	0	0	0	0	1	532525	1	532.525	5	1	0	1.048	3	2	52	0	8	1	3	0	1	0	0	0	0	1	0	0	0	0	0	0	0	0	0	0.386675	1	0	1	0
20261	2	3	302	24160	3178.5	0	0	0	0	1	255260	1	255.26	0	0	0	2.448	3	2	42	0	10	1	3	0	1	0	0	0	0	1	0	0	0	0	0	0	0	0	0	0.386675	1	0	1	0
20262	2	3	302	24161	113	1	0	0	0	0	incomplete data	0				1	0.003	7	3	33	0	7	1	3		0	0	0	0	0	1	0	0	0	0	0	0	0	0	0	0.386675	0	1	0	1
20263	2	3	302	24161	3955	1	0	0	0	0	24800	1	24.8	0	0	0	0.227	6	3.5	48	0	8	1	3	0	1	0	0	0	0	0	0	0	0	0	0	0	0	0	1	0.386675	1	0	1	0
20264	2	3	302	24161	904	0	0	0	0	1	217450	1	217.45	0	0	0	2.043	2	1.5	70	0	12	1	3	0	1	0	0	0	0	1	1	0	0	0	0	0	0	0	0	0.386675	1	0	1	0
20265	2	3	302	24161	904	0	0	0	0	1	262200	1	262.2	0	0	0	2.123	2	1.5	74	0	12	1	3	0	1	0	0	0	0	1	0	0	0	0	0	0	0	0	1	0.386675	1	0	1	0
20266	2	3	302	24161	1130	1	0	0	0	0	incomplete data	0				1	0.003	4	2.3	52	0	1	1	3	0	0	0	0	1	0	1	0	0	0	0	0	0	0	0	1	0.386675	0	1	0	1
20267	2	3	302	24161	6780	0	0	0	0	1	49100	1	49.1	0	0	0	0.454	11	5.4	65	0	1	1	3	0	1	0	0	0	0	1	0	0	0	0	0	0	0	0	0	0.386675	1	0	1	0
20268	2	3	302	24161	2712	0	0	0	0	1	138000	1	138	8	1	0	0.05	7	3.8	58	0	12	1	3	0	1	0	0	0	0	1	0	0	0	0	0	0	0	0	1	0.386675	1	0	1	0
20269	2	3	302	24161	2034	0	0	0	0	1	385280	1	385.28	4	1	0	2.907	6	3.1	61	0	8	1	3	0	1	0	0	0	0	1	0	0	0	0	0	0	0	0	1	0.386675	1	0	1	0
20294	2	3	302	24165	156	1	0	0	0	0	incomplete data	0				0	0.012	10	4.7	60	0	1	1	3	0	0	0	0	1	0	1	0	0	0	0	0	0	0	0	1	0.386675	0	1	0	1
20295	2	3	302	24165	2418	0	0	0	0	1	30650	1	30.65	0	0	1	0.308	1	1	45	1	1	1	1	1	1	0	0	0	0	1	0	0	0	0	0	0	0	0	0	0.386675	1	0	1	0
20296	2	3	302	24165	2418	0	0	0	0	1	39730	1	39.73	0	0	0	0.808	7	3.8	54	0	8	1	3	0	0	0	0	1	0	1	0	0	0	0	0	0	0	0	0	0.386675	1	0	1	0
20297	2	3	302	24165	156	0	0	0	0	1	230105	1	230.105	0	0	0	1.633	5	2.8	70	0	1	1	3	0	1	0	0	0	0	1	0	0	0	0	0	0	0	0	1	0.386675	1	0	1	0
20298	2	3	302	24165	156	0	0	0	0	1	259370	1	259.37	4	1	0	1.344	3	2	55	0	6	1	3	0	1	0	0	0	0	1	0	0	0	0	0	0	0	0	1	0.386675	1	0	1	0
20299	2	3	302	24165	312	0	0	0	0	1	425780	1	425.78	0	0	0	3.347	2	1.5	59	0	6	1	3	0	1	0	0	0	0	1	0	0	0	0	0	0	0	0	1	0.386675	1	0	1	0
20300	2	3	302	24165	312	0	0	0	0	1	329790	1	329.79	0	0	0	2.043	5	3	55	0	1	1	3	0	1	0	0	0	0	1	0	0	0	0	0	0	0	0	1	0.386675	1	0	1	0
20301	2	3	302	24165	312	0	0	0	0	1	318050	1	318.05	0	0	0	2.023	5	3	65	0	11	1	3	0	1	0	0	0	0	1	0	0	0	0	0	0	0	0	1	0.386675	1	0	1	0
20066	2	3	303	24106	1192	1	0	0	0	0	incomplete data	0				1	0.017	6	3.5	50	0	1	1	3	0	0	0	1	0	0	1	0	0	0	0	0	0	0	0	0	0.0018104	0	1	0	1
20067	2	3	303	24106	1192	0	0	0	0	1	incomplete data	0				0	0.411	3	1.6	40	1	6	1	3	1	0	0	0	0	1	1	0	0	0	0	0	0	0	0	0	0.0018104	0	1	0	1
20068	2	3	303	24106	223.5	1	0	0	0	0	incomplete data	0				1	0.03	6	3.1	35	0	10	1	3	0	0	0	0	1	0	1	0	0	0	0	0	0	0	0	0	0.0018104	0	1	0	1
20069	2	3	303	24106	223.5	0	0	0	0	1	165585	1	165.585	0	0	0	0.624	4	2.1	35	0	8	1	3	0	0	1	0	0	0	1	0	0	0	0	0	0	0	0	1	0.0018104	1	0	1	0
20070	2	3	303	24106	223.5	0	0	0	0	1	281320	1	281.32	0	0	0	2.857	3	2	70	0	8	1	3	1	1	0	0	0	0	1	0	0	0	0	0	0	0	0	0	0.0018104	1	0	1	0
20071	2	3	303	24106	223.5	0	0	0	0	1	41820	1	41.82	0	0	0	0.423	4	2.3	45	0	7	1	3	0	0	0	1	0	0	1	0	0	0	0	0	0	0	0	1	0.0018104	1	0	1	0
20072	2	3	303	24106	223.5	0	0	0	0	1	598949	0		0	0	0	4.906	7	3.4	70	0	6	1	3	0	0	0	1	0	0	1	0	0	0	0	0	0	0	0	1	0.0018104	0	1	0	1
20073	2	3	303	24106	223.5	0	0	0	0	1	392530	1	392.53	10	1	0	3.136	3	2	59	0	10	1	3	0	1	0	0	0	0	1	0	0	0	0	0	0	0	0	1	0.0018104	1	0	1	0
20074	2	3	303	24107	573.75	0	0	0	0	1	102970	1	102.97	0	0	0	0.966	3	2	45	0	5	1	3	1	1	0	0	0	0	1	1	0	0	0	0	1	0	0	1	0.0018104	1	0	1	0
20075	2	3	303	24107	573.75	1	0	0	0	0	incomplete data	0				1	0.02	6	3.1	66	0	1	1	3	1	0	0	0	1	0	1	1	0	0	0	0	1	0	0	1	0.0018104	0	1	0	1
20076	2	3	303	24107	828.75	0	0	0	0	1	103318	1	103.318	0	0	0	1.226	5	2.6	39	0	10	1	3	0	0	0	0	1	0	1	0	0	0	0	0	0	0	0	1	0.0018104	1	0	1	0
20077	2	3	303	24107	828.75	0	0	0	1	0	167310	1	167.31	0	0	0	1.643	6	3.5	65	0	1	1	3	0	1	0	0	0	0	1	0	0	0	0	0	0	0	0	1	0.0018104	1	0	1	0
20078	2	3	303	24107	1785	0	0	0	1	0	295610	1	295.61	0	0	0	2.88	2	1.5	48	0	8	1	3	0	1	0	0	0	0	1	0	0	0	0	0	0	0	0	1	0.0018104	1	0	1	0
20079	2	3	303	24107	1785	0	0	0	0	1	1300000	0		0	0	0	9.712	7	3.8	70	0	1	1	3	0	1	0	0	0	0	1	0	0	0	0	0	0	0	0	1	0.0018104	0	1	0	1
20080	2	3	303	24107	1785	0	0	0	1	0	720448	0		4	1	0	5.323	9	4.4	65	0	5	1	3	0	1	0	0	0	0	1	0	0	0	0	0	1	0	0	1	0.0018104	0	1	0	1
20081	2	3	303	24107	1785	0	0	0	1	0	353900	1	353.9	0	0	0	2.83	3	2	55	0	1	1	3	0	1	0	0	0	0	1	1	0	0	0	0	0	0	0	1	0.0018104	1	0	1	0
20154	2	3	303	24137	346	1	0	0	0	0	incomplete data	0				0	0.005	2	1.5	63	0	1	1	3	0	0	1	0	0	0	1	0	0	0	0	0	0	0	0	1	0.0018104	0	1	0	1
20155	2	3	303	24137	3114	0	0	0	1	0	incomplete data	0				0	2.037	4	2.5	45	1	12	1	3	0	0	1	0	0	0	1	0	0	0	0	0	0	0	0	1	0.0018104	0	1	0	1
20156	2	3	303	24137	3114	0	0	0	1	0	incomplete data	0				0	0.005	4	2.5	68	0	1	1	3	0	0	0	1	0	0	1	0	0	0	0	0	0	0	0	1	0.0018104	0	1	0	1
20157	2	3	303	24137	346	0	0	0	1	0	99495	1	99.495	0	0	0	0.847	4	2.5	45	0	8	1	3	0	1	0	0	0	0	1	0	0	0	0	0	0	0	0	1	0.0018104	1	0	1	0
20158	2	3	303	24137	346	0	0	0	1	0	118650	1	118.65	0	0	0	1.122	6	3.5	65	1	1	1	3	0	1	0	0	0	0	1	0	0	0	0	0	0	0	0	1	0.0018104	1	0	1	0
20159	2	3	303	24137	461.33	0	0	0	1	0	732540	0		0	0	0	2.503	7	3.4	65	0	6	1	3	0	1	0	0	0	0	1	0	0	0	0	0	1	0	0	1	0.0018104	0	1	0	1
20160	2	3	303	24137	461.33	0	0	0	1	0	2200000	0		0	0	0	12.216	12	6.5	57	0	6	1	3	0	1	0	0	0	0	1	0	0	0	0	1	1	0	0	1	0.0018104	0	1	0	1
20161	2	3	303	24137	461.33	0	0	0	1	0	477260	1	477.26	0	0	0	2.049	4	2.3	60	0	12	1	3	0	1	0	0	0	0	1	0	0	0	0	0	0	0	0	1	0.0018104	1	0	1	0
20278	2	3	303	24163	3697.5	0	0	0	0	1	33750	1	33.75	0	0	0	0.033	4	2.3	41	0	7	1	3		0	0	0	1	0	0	0	0	0	0	0	0	0	0	1	0.0018104	1	0	1	0
20279	2	3	303	24163	637.5	0	0	0	0	1	44160	1	44.16	0	0	0	2.073	5	3	65	1	1	1	3	0	0	0	0	0	1	0	0	0	0	0	0	0	0	0	1	0.0018104	1	0	1	0
20280	2	3	303	24163	446.25	0	0	0	0	1	827000	0		0	0	0	4.478	7	4	44	0	6	1	3	0	1	0	0	0	0	1	0	0	0	0	1	0	0	0	1	0.0018104	0	1	0	1
20281	2	3	303	24163	446.25	1	0	0	0	0	92600	1	92.6	0	0	0	0.419	4	2.5	46	0	7	1	3	0	0	0	0	1	0	1	0	0	0	0	0	0	0	0	1	0.0018104	1	0	1	0
20282	2	3	303	24163	5100	0	0	0	0	1	incomplete data	0				0	0.01	4	2.3	39	0	10	1	3	0	0	0	0	1	0	1	0	0	0	0	0	0	0	0	1	0.0018104	0	1	0	1
20283	2	3	303	24163	1912.5	0	0	0	0	1	45400	1	45.4	0	0	0	1.036	3	2	49	1	8	1	3	0	0	0	0	0	0	1	0	0	0	0	0	0	0	0	1	0.0018104	1	0	1	0
20284	2	3	303	24163	1912.5	0	0	0	0	1	256720	1	256.72	0	0	0	2.149	6	3.1	52	0	1	1	3	0	1	0	0	0	0	1	0	0	0	0	0	0	0	0	1	0.0018104	1	0	1	0
20285	2	3	303	24163	1912.5	1	0	0	0	0	incomplete data	0				0	0	3	2	55	0	1	0	3	0	0	0	0	1	0	1	0	0	0	0	0	0	0	0	1	0.0018104	0	1	0	1
20326	2	3	303	24169	2682	0	0	0	0	1	60000	1	60	0	0	0	0.829	4	2.5	77	1	1	1	3	0	1	0	0	0	0	1	0	0	0	0	0	0	0	0	1	0.0018104	1	0	1	0
20327	2	3	303	24169	2682	0	0	0	0	1	118820	1	118.82	0	0	0	1.031	4	2.5	95	1	1	1	3	0	1	0	0	0	0	1	0	0	0	0	0	0	0	0	1	0.0018104	1	0	1	0
20328	2	3	303	24169	1862.5	0	0	0	0	1	76170	1	76.17	0	0	0	0.839	5	3	65	0	6	1	3	0	0	1	0	0	0	1	0	0	0	0	0	0	0	0	1	0.0018104	1	0	1	0
20329	2	3	303	24169	1862.5	0	0	0	0	1	23590	1	23.59	0	0	0	1.077	5	3	75	0	1	1	3	0	0	1	0	0	0	0	0	0	0	0	0	0	0	0	1	0.0018104	1	0	1	0
20330	2	3	303	24169	1788	0	0	0	0	1	193810	1	193.81	0	0	0	2.871	6	3.1	65	0	1	1	3	0	1	0	0	0	0	1	0	0	0	0	0	0	0	0	1	0.0018104	1	0	1	0
20331	2	3	303	24169	1788	0	0	0	0	1	259660	1	259.66	0	0	0	3.276	6	3.3	75	0	1	1	3		1	0	0	0	0	1	0	0	0	0	0	0	0	0	1	0.0018104	1	0	1	0
20332	2	3	303	24169	1788	0	0	0	0	1	305840	1	305.84	0	0	0	4.085	6	3.1	56	0	8	1	3	0	1	0	0	0	0	1	0	0	0	0	0	0	0	0	1	0.0018104	1	0	1	0
20333	2	3	303	24169	1788	0	0	0	0	1	345610	1	345.61	0	0	0	3.68	3	2	65	0	5	1	3	0	1	0	0	0	0	1	0	0	0	0	0	0	0	0	1	0.0018104	1	0	1	0
20082	2	3	304	24108	2772	0	0	0	1	0	14600	1	14.6	0	0	0	0.168	6	3.1	55	1	5	1	3	0	0	0	1	0	0	0	0	0	0	0	0	0	0	0	1	0.0011511	1	0	1	0
20083	2	3	304	24108	2772	0	0	0	0	1	89740	1	89.74	0	0	0	0.929	6	3.3	60	0	7	1	3	0	1	0	0	0	0	1	0	0	0	0	0	0	0	0	1	0.0011511	1	0	1	0
20084	2	3	304	24108	840	0	0	0	0	1	9860	1	9.86	0	0	0	0.24	4	2.5	49	0	6	1	3	0	1	0	0	0	0	1	0	0	0	0	0	0	0	0	1	0.0011511	1	0	1	0
20085	2	3	304	24108	840	0	0	0	0	1	210700	1	210.7	0	0	0	1.649	18	8.1	65	0	7	1	3	0	0	0	1	0	0	1	0	1	0	0	0	0	0	0	1	0.0011511	1	0	1	0
20086	2	3	304	24108	756	0	0	0	0	1	393645	1	393.645	0	0	0	2.251	6	3.3	44	0	8	1	3	0	1	0	0	0	0	1	0	0	0	0	0	0	0	0	1	0.0011511	1	0	1	0
20087	2	3	304	24108	756	0	0	0	0	1	334020	1	334.02	0	0	0	3.263	14	6.7	85	0	1	1	3	0	1	0	0	0	0	1	0	0	0	0	0	0	0	0	1	0.0011511	1	0	1	0
20088	2	3	304	24108	756	0	0	0	1	0	267200	1	267.2	0	0	0	0.125	6	2.9	44	0	7	1	3	0	1	0	0	0	0	1	1	1	0	0	0	0	0	0	1	0.0011511	1	0	1	0
20089	2	3	304	24108	756	0	0	0	0	1	2315	1	2.315	0	0	0	0.025	4	2.3	47	0	8	1	3	0	1	0	0	0	0	1	0	0	0	0	0	0	0	0	1	0.0011511	1	0	1	0
20302	2	3	304	24166	2688	1	0	0	0	0	incomplete data	0				1	0.042	8	3.9	50	0	1	1	3	1	0	0	0	1	0	1	0	0	0	0	0	0	0	0	1	0.0011511	0	1	0	1
20303	2	3	304	24166	2688	0	0	0	0	1	23400	1	23.4	0	0	0	1.037	5	3	62	0	1	1	3	0	0	0	0	1	0	0	0	0	0	0	0	0	0	0	1	0.0011511	1	0	1	0
20304	2	3	304	24166	168	0	0	0	1	0	90480	1	90.48	0	0	0	0.85	4	2.5	50	0	8	1	3	0	1	0	0	0	0	1	0	0	0	0	0	0	0	0	1	0.0011511	1	0	1	0
20305	2	3	304	24166	571.2	0	0	0	0	1	962700	0		0	0	0	4.172	9	4.4	48	0	8	1	3	0	1	0	0	0	0	1	0	0	0	0	1	0	0	0	1	0.0011511	0	1	0	1
20306	2	3	304	24166	571.2	0	0	0	0	1	411720	1	411.72	0	0	0	3.526	7	4	80	0	1	1	3	0	1	0	0	0	0	1	0	0	0	0	0	0	0	0	1	0.0011511	1	0	1	0
20307	2	3	304	24166	571.2	0	0	0	0	1	3500000	0		0	0	0	1.264	8	4.5	45	0	8	1	3	0	1	0	0	0	0	1	0	0	0	1	1	0	0	0	1	0.0011511	0	1	0	1
20308	2	3	304	24166	571.2	0	0	0	0	1	795600	0		0	0	0	3.787	7	3.6	60	0	5	1	3	0	1	0	0	0	0	1	0	0	0	0	1	0	0	0	1	0.0011511	0	1	0	1
20309	2	3	304	24166	571.2	0	0	0	0	1	391250	1	391.25	0	0	0	4.134	10	5.3	78	0	1	1	3	0	1	0	0	0	0	1	0	0	0	0	0	0	0	0	1	0.0011511	1	0	1	0
20310	2	3	304	24167	2029.5	1	0	0	0	0	incomplete data	0				1	0.005	5	2.4	38	0	6	1	3	0	0	0	0	1	0	1	0	0	0	0	0	0	0	0	1	0.0011511	0	1	0	1
20311	2	3	304	24167	2029.5	0	0	0	0	1	16250	1	16.25	0	0	0	0.645	3	2	48	1	7	1	3	0	0	0	0	1	0	0	0	0	0	0	0	0	0	0	1	0.0011511	1	0	1	0
20312	2	3	304	24167	184.5	0	0	0	0	1	135350	1	135.35	0	0	0	1.436	2	1.5	45	1	8	1	3	0	1	0	0	0	0	1	0	0	0	0	0	0	0	0	1	0.0011511	1	0	1	0
20313	2	3	304	24167	184.5	0	0	0	0	1	281030	1	281.03	0	0	0	1.876	9	4.6	75	0	1	1	3	0	1	0	0	0	0	1	0	0	0	0	0	0	0	0	1	0.0011511	1	0	1	0
20314	2	3	304	24167	322.88	0	0	0	0	1	28350	1	28.35	0	0	0	2.468	6	3.5	49	0	8	1	3	0	0	1	0	0	0	0	0	0	0	0	0	0	0	0	1	0.0011511	1	0	1	0
20315	2	3	304	24167	322.88	0	0	0	0	1	18550	1	18.55	0	0	0	0.721	5	2.8	43	0	6	1	3	0	0	1	0	0	0	0	0	0	0	0	0	0	0	0	1	0.0011511	1	0	1	0
20316	2	3	304	24167	322.88	0	0	0	0	1	585790	0		0	0	0	7.32	6	3.3	53	0	1	1	3	0	1	0	0	0	0	1	0	0	0	0	0	0	0	0	1	0.0011511	0	1	0	1
20317	2	3	304	24167	322.88	0	0	0	0	1	260280	1	260.28	0	0	0	2.503	9	4.6	74	1	1	1	3	0	1	0	0	0	0	1	0	0	0	0	0	0	1	0	1	0.0011511	1	0	1	0
20318	2	3	304	24168	145.5	1	0	0	0	0	incomplete data	0				1	0.004	5	2.4	40	0	5	1	3	0	0	0	0	1	0	1	0	0	0	0	0	0	1	0	1	0.0011511	0	1	0	1
20319	2	3	304	24168	145.5	1	0	0	0	0	incomplete data	0				1	0.004	4	1.9	36	1	1	1	3	0	0	0	0	1	0	1	0	0	0	0	0	0	1	0	1	0.0011511	0	1	0	1
20320	2	3	304	24168	3007	1	0	0	0	0	141730	1	141.73	0	0	0	0.025	8	4.1	52	0	1	1	3		1	0	0	0	0	1	0	0	0	0	0	0	0	0	1	0.0011511	1	0	1	0
20321	2	3	304	24168	194	0	0	0	0	1	101365	1	101.365	0	0	0	1.032	2	1.5	54	0	8	1	3	0	1	0	0	0	0	1	0	0	0	0	0	0	0	0	1	0.0011511	1	0	1	0
20322	2	3	304	24168	97	1	0	0	0	0	191185	1	191.185	0	0	0	0.075	5	3	60	0	1	1	3	1	1	0	0	0	0	1	0	0	0	0	0	0	0	0	1	0.0011511	1	0	1	0
20323	2	3	304	24168	10185	1	0	0	0	0	incomplete data	0				1	0.015	6	3.1	60	0	5	1	3	1	0	0	0	1	0	1	0	0	0	0	0	0	0	0	1	0.0011511	0	1	0	1
20324	2	3	304	24168	873	0	0	0	0	1	156440	1	156.44	0	0	0	1.644	5	2.8	70	0	1	1	3	0	1	0	0	0	0	1	0	0	0	0	0	0	0	0	1	0.0011511	1	0	1	0
20325	2	3	304	24168	1455	0	0	0	0	1	196300	1	196.3	0	0	0	1.259	10	4.7	80	0	6	1	3	0	1	0	0	0	0	1	0	0	0	0	0	0	0	0	1	0.0011511	1	0	1	0
20502	2	3	304	24192	97	1	0	0	0	0	incomplete data	0				0	0.004	7	3.2	35	0	1	1	3	0	0	0	0	1	0	0	0	0	0	0	0	0	0	0	1	0.0011511	0	1	0	1
20503	2	3	304	24192	1067	0	0	0	0	1	75400	1	75.4	0	0	0	0.016	6	3.5	76	0	1	1	3	0	1	0	0	0	0	1	0	0	0	0	0	0	0	0	1	0.0011511	1	0	1	0
20504	2	3	304	24192	291	0	0	0	0	1	136980	1	136.98	0	0	0	0.435	4	2.5	60	0	1	1	3	0	1	0	0	0	0	1	0	0	0	0	0	0	0	0	0	0.0011511	1	0	1	0
20505	2	3	304	24192	97	0	0	0	0	1	227600	1	227.6	0	0	0	2.039	8	4.1	65	0	1	1	3	0	1	0	0	0	0	1	0	0	0	0	0	0	0	0	1	0.0011511	1	0	1	0
20506	2	3	304	24192	97	0	0	0	0	1	281700	1	281.7	5	1	0	1.642	5	2.8	60	0	8	1	3	0	1	0	0	0	0	1	0	0	0	0	0	0	0	0	1	0.0011511	1	0	1	0
20507	2	3	304	24192	1164	1	0	0	0	0	incomplete data	0				0	0.003	7	3.4	42	0	6	1	3	0	0	1	0	0	0	1	0	0	0	0	0	0	0	0	1	0.0011511	0	1	0	1
20508	2	3	304	24192	8148	0	0	0	0	1	23000	1	23	0	0	0	0.202	5	3	52	1	8	1	3	0	0	1	0	0	0	0	0	0	0	0	0	0	0	0	1	0.0011511	1	0	1	0
20509	2	3	304	24192	2910	0	0	0	0	1	87840	1	87.84	0	0	0	0.824	4	2.5	50	0	1	1	3	0	1	0	0	0	0	1	0	0	0	0	0	0	0	0	1	0.0011511	1	0	1	0
20518	2	3	304	24194	307.5	0	0	0	0	1	incomplete data	0				0	0.075	9	4.6	60	0	1	1	3	0	0	1	0	0	0	1	0	0	0	0	0	0	1	0	1	0.0011511	0	1	0	1
20519	2	3	304	24194	307.5	0	0	0	0	1	incomplete data	0				0	0.075	4	2.1	28	0	1	1	3	0	0	1	0	0	0	1	0	0	0	0	0	0	1	0	1	0.0011511	0	1	0	1
20520	2	3	304	24194	307.5	0	0	0	0	1	incomplete data	0				0	0.075	4	2.1	32	0	1	1	3	0	0	1	0	0	0	1	0	0	0	0	0	0	1	0	1	0.0011511	0	1	0	1
20521	2	3	304	24194	184.5	0	0	0	0	1	37615	1	37.615	0	0	0	0.404	3	2	56	0	5	1	3	0	1	0	0	0	0	1	0	0	0	0	0	0	0	0	1	0.0011511	1	0	1	0
20522	2	3	304	24194	184.5	0	0	0	0	1	415050	1	415.05	0	0	0	1.669	5	2.8	62	0	6	1	3	0	1	0	0	0	0	1	0	0	0	0	0	0	0	0	1	0.0011511	1	0	1	0
20523	2	3	304	24194	184.5	0	0	0	0	1	230350	1	230.35	0	0	0	2.445	3	2	56	0	1	1	3	0	1	0	0	0	0	1	0	0	0	0	0	1	0	0	1	0.0011511	1	0	1	0
20524	2	3	304	24194	184.5	0	0	0	0	1	707000	0		0	0	0	6.525	8	4.1	72	0	1	1	3	0	1	0	0	0	0	1	0	0	0	0	0	0	1	0	1	0.0011511	0	1	0	1
20525	2	3	304	24194	184.5	0	0	0	0	1	397820	1	397.82	4	1	0	5.315	8	4.5	74	0	1	1	1	0	1	0	0	0	0	1	0	0	0	0	0	0	0	0	1	0.0011511	1	0	1	0
20342	2	3	305	24171	7518.25	1	0	0	0	0	incomplete data	0				0	0.013	7	3.8	48	0	10	1	3	0	0	0	0	1	0	1	0	0	0	0	0	0	0	0	1	0.0089407	0	1	0	1
20343	2	3	305	24171	7518.25	1	0	0	0	0	incomplete data	0				0	0.02	5	2.6	38	0	7	1	3	0	0	0	0	1	0	1	0	0	0	0	0	0	0	0	1	0.0089407	0	1	0	1
20344	2	3	305	24171	246.5	0	0	0	0	1	115015	1	115.015	5	1	0	1.769	3	2	50	0	1	1	3	0	1	0	0	0	0	1	0	0	0	0	0	0	0	0	1	0.0089407	0	0	1	0
20345	2	3	305	24171	345.1	0	0	0	0	1	700698	0		5	1	0	5.058	5	3	76	0	8	1	3	0	1	0	0	0	0	1	0	1	0	0	0	0	0	0	1	0.0089407	0	1	0	1
20346	2	3	305	24171	345.1	0	0	0	0	1	950420	0		0	0	0	6.223	7	4	47	0	8	1	3	0	1	0	0	0	0	1	0	1	0	0	1	0	0	0	1	0.0089407	0	1	0	1
20347	2	3	305	24171	345.1	0	0	0	0	1	393030	1	393.03	0	0	0	2.125	6	3.5	70	0	6	1	3	0	1	0	0	0	0	1	0	1	0	0	0	0	0	0	1	0.0089407	0	0	1	0
20348	2	3	305	24171	345.1	0	0	0	0	1	2100000	0		10	1	0	16.39	6	3.1	70	0	13	1	3	0	1	0	0	0	0	1	0	1	0	0	1	0	0	0	1	0.0089407	0	1	0	1
20349	2	3	305	24171	345.1	0	0	0	0	1	507710	1	507.71	0	0	0	5.135	5	2.6	70	0	12	1	3	0	1	0	0	0	0	1	0	1	0	0	1	0	0	0	1	0.0089407	0	0	1	0
20350	2	3	305	24172	9987.5	0	0	1	0	0	16070	1	16.07	0	0	0	0.311	5	3	50	0	1	1	3	1	0	1	0	0	0	1	0	0	0	0	0	0	0	0	1	0.0089407	0	0	1	0
20351	2	3	305	24172	2762.5	0	0	0	0	1	225100	1	225.1	5	1	0	1.12	5	2.8	67	1	6	1	3	0	0	0	0	0	1	1	0	0	0	0	0	0	0	0	1	0.0089407	0	0	1	0
20352	2	3	305	24172	850	0	0	0	0	1	197880	1	197.88	0	0	0	2.049	5	2.8	68	0	8	1	3	0	1	0	0	0	0	1	0	0	0	0	0	0	0	0	1	0.0089407	0	0	1	0
20353	2	3	305	24172	850	0	0	0	0	1	148960	1	148.96	0	0	0	2.453	3	1.8	45	0	7	1	3	0	1	0	0	0	0	1	0	0	0	0	0	0	0	0	1	0.0089407	0	0	1	0
20354	2	3	305	24172	425	0	0	0	1	0	incomplete data	0				0	0.004	2	1.5	35	0	5	1	3	0	0	0	1	0	0	1	0	0	0	0	0	0	0	0	1	0.0089407	0	1	0	1
20355	2	3	305	24172	17425	0	0	0	1	0	9365	1	9.365	0	0	0	0.165	4	2.5	47	0	8	1	3	0	0	0	0	0	1	1	0	0	0	0	0	0	0	0	1	0.0089407	0	0	1	0
20356	2	3	305	24172	3825	0	0	0	1	0	69240	1	69.24	0	0	0	0.419	6	3.1	55	0	1	1	3	0	1	0	0	0	0	1	0	0	0	0	0	0	0	0	1	0.0089407	0	0	1	0
20357	2	3	305	24172	850	1	0	0	0	0	207895	1	207.895	0	0	0	0.038	15	6.4	46	0	8	1	3	0	1	0	0	0	0	1	0	0	0	0	0	0	0	0	1	0.0089407	0	0	1	0
20366	2	3	305	24174	11664	1	0	0	0	0	incomplete data	0				0	0.03	6	3.5	42	0	6	1	3	1	0	0	0	1	0	1	0	0	0	0	0	0	0	0	1	0.0089407	0	1	0	1
20367	2	3	305	24174	648	1	0	0	0	0	incomplete data	0				1	1.041	4	2.3	45	0	8	1	3	0	0	0	1	0	0	1	0	0	0	0	0	0	0	0	1	0.0089407	0	1	0	1
20368	2	3	305	24174	432	1	0	0	0	0	incomplete data	0				0	2.631	3	2	65	1	1	1	3	0	0	0	0	1	0	1	0	0	0	0	0	0	0	0	1	0.0089407	0	1	0	1
20369	2	3	305	24174	432	1	0	0	0	0	30600	1	30.6	0	0	0	2.034	2	1.5	85	0	5	1	3	0	1	0	0	0	0	1	0	0	0	0	0	0	0	0	1	0.0089407	0	0	1	0
20370	2	3	305	24174	24624	1	0	0	0	0	incomplete data	0				0	0.01	1	1	55	0	6	1	3	1	0	0	0	1	0	1	0	0	0	0	0	0	0	0	1	0.0089407	0	1	0	1
20371	2	3	305	24174	1944	1	0	0	0	0	-20950	1	-20.95	0	0	0	1.238	5	3	55	0	6	1	3	0	0	0	0	1	0	1	0	0	0	0	0	0	0	0	0	0.0089407	0	0	1	0
20372	2	3	305	24174	648	1	0	0	0	0	164688	1	164.688	0	0	0	0.02	2	1.5	29	0	6	1	3		1	0	0	0	0	1	0	0	0	0	0	0	0	0	1	0.0089407	0	0	1	0
20373	2	3	305	24174	648	1	0	0	0	0	-23050	1	-23.05	0	0	0	2.459	6	3.1	60	0	8	1	3	0	0	0	0	0	1	1	0	0	0	0	0	0	0	0	0	0.0089407	0	0	1	0
20486	2	3	305	24190	246.5	1	0	0	0	0	incomplete data	0				0	0.003	4	2.3	42	0	8	1	3	0	0	0	0	1	0	1	0	0	0	0	0	0	0	0	0	0.0089407	0	1	0	1
20487	2	3	305	24190	2711.5	1	0	0	0	0	incomplete data	0				1	0	6	3.3	58	0	5	0	3	1	0	0	0	1	0	1	0	0	0	0	0	0	0	0	0	0.0089407	0	1	0	1
20488	2	3	305	24190	2711.5	1	0	0	0	0	incomplete data	0				0	0.025	7	3.6	50	0	1	1	3	0	0	0	0	1	0	1	0	0	0	0	0	0	0	0	0	0.0089407	0	1	0	1
20489	2	3	305	24190	246.5	0	0	0	0	1	130690	1	130.69	0	0	0	3.287	4	2.3	53	1	6	1	3	0	1	0	0	0	0	1	0	0	0	0	0	0	0	0	1	0.0089407	0	0	1	0
20490	2	3	305	24190	616.25	0	0	0	0	1	510350	1	510.35	5	1	0	4.856	3	2	50	0	7	1	3	0	1	0	0	0	0	1	0	1	0	0	0	0	0	0	1	0.0089407	0	0	1	0
20491	2	3	305	24190	616.25	0	0	0	0	1	192523	1	192.523	5	1	0	2.966	2	1.5	65	0	10	1	3	0	0	0	0	0	1	1	0	1	0	0	0	0	0	0	1	0.0089407	0	0	1	0
20492	2	3	305	24190	616.25	0	0	0	0	1	169981	1	169.981	0	0	0	2.534	2	1.5	69	0	7	1	3	0	1	0	0	0	0	1	0	0	0	0	0	0	0	0	1	0.0089407	0	0	1	0
20493	2	3	305	24190	616.25	0	0	0	0	1	155423	1	155.423	0	0	0	2.527	6	3.5	80	0	1	1	3	0	1	0	0	0	0	1	0	1	0	0	0	0	0	0	1	0.0089407	0	0	1	0
20494	2	3	305	24191	216	1	0	0	0	0	incomplete data	0				0	0.004	4	2.1	32	0	8	1	3		0	0	0	1	0	1	0	1	0	0	0	0	0	0	1	0.0089407	0	1	0	1
20495	2	3	305	24191	216	0	0	0	0	1	incomplete data	0				0	0.005	5	2.8	47	0	7	1	3	0	0	0	0	1	0	1	0	1	0	0	0	0	0	0	1	0.0089407	0	1	0	1
20496	2	3	305	24191	4212	0	0	0	0	1	incomplete data	0				0	0.013	6	3.1	80	0	7	1	3	0	0	0	0	1	0	1	0	1	0	0	0	0	0	0	1	0.0089407	0	1	0	1
20497	2	3	305	24191	4212	1	0	0	0	0	incomplete data	0				0	0.253	5	3	53	0	7	1	3	0	0	0	0	0	1	1	0	1	0	0	0	0	0	0	1	0.0089407	0	1	0	1
20498	2	3	305	24191	972	0	0	0	0	1	incomplete data	0				0	1.34	6	3.3	62	0	6	1	3	0	0	0	0	0	0	1	0	1	0	0	0	0	0	0	1	0.0089407	0	1	0	1
20499	2	3	305	24191	972	0	0	0	0	1	6622	1	6.622	0	0	0	1.113	6	3.5	85	0	5	1	3	0	0	0	0	1	0	0	0	0	0	0	0	0	0	0	1	0.0089407	0	0	1	0
20500	2	3	305	24191	3564	0	0	0	0	1	incomplete data	0				0	2.428	2	1.5	65	0	7	1	3	0	0	0	0	1	0	0	0	0	0	0	0	0	0	0	1	0.0089407	0	1	0	1
20501	2	3	305	24191	3564	1	0	0	0	0	incomplete data	0				0	3.06	4	2.5	55	1	6	1	3	0	0	0	0	1	0	0	0	0	0	0	0	0	0	0	1	0.0089407	0	1	0	1
20526	2	3	305	24195	3400	1	0	0	0	0	18960	1	18.96	0	0	0	0.419	7	3.2	60	0	6	1	3	0	0	0	0	1	0	1	0	0	0	0	0	0	0	0	1	0.0089407	0	0	1	0
20527	2	3	305	24195	3400	0	0	0	0	1	49794	1	49.794	0	0	0	0.859	3	2	42	0	8	1	3	0	1	0	0	0	0	1	0	0	0	0	0	0	0	0	1	0.0089407	0	0	1	0
20528	2	3	305	24195	1593.75	0	0	0	0	1	113010	1	113.01	0	0	0	1.046	4	2.1	37	0	8	1	3	0	1	0	0	0	0	1	0	1	0	0	0	0	0	0	1	0.0089407	0	0	1	0
20529	2	3	305	24195	1593.75	0	0	0	0	1	91194	1	91.194	0	0	0	1.066	4	2.3	52	0	7	1	3	0	1	0	0	0	0	1	0	0	0	0	0	0	0	0	1	0.0089407	0	0	1	0
20530	2	3	305	24195	584.38	0	0	0	0	1	366600	1	366.6	0	0	0	4.097	6	3.5	65	0	1	1	3	0	1	0	0	0	0	1	0	1	0	0	0	0	0	0	1	0.0089407	0	0	1	0
20531	2	3	305	24195	584.38	0	0	0	0	1	147598	1	147.598	0	0	0	2.049	4	2.5	45	1	8	1	3	0	1	0	0	0	0	1	0	0	0	0	0	0	0	0	1	0.0089407	0	0	1	0
20532	2	3	305	24195	584.38	0	0	0	0	1	887460	0		0	0	0	1.669	4	2.5	42	0	6	1	3	0	1	0	0	0	0	1	0	1	0	0	0	0	0	0	1	0.0089407	0	1	0	1
20533	2	3	305	24195	584.38	0	0	0	0	1	449928	1	449.928	0	0	0	3.693	2	1.5	45	0	7	1	3	0	1	0	0	0	0	1	0	1	0	0	0	0	1	0	1	0.0089407	0	0	1	0
20334	2	3	306	24170	115.5	1	0	0	0	0	incomplete data	0				1	0.003	7	3.4	65	1	1	1	3	1	0	1	0	0	0	1	0	0	0	0	0	0	0	0	1	0.006742	0	1	0	1
20335	2	3	306	24170	115.5	1	0	0	0	0	incomplete data	0				0	0.003	5	2.6	42	0	1	1	3	1	0	0	0	1	0	1	0	0	0	0	0	0	0	0	1	0.006742	0	1	0	1
20336	2	3	306	24170	1328.25	0	0	0	0	1	5930	1	5.93	0	0	0	0.05	3	2	70	0	5	1	3	0	0	0	0	1	0	1	0	0	0	0	0	0	0	0	1	0.006742	0	0	1	0
20337	2	3	306	24170	1328.25	0	0	0	0	1	69171	1	69.171	0	0	0	0.627	3	2	55	0	5	1	3	0	0	0	0	1	0	1	0	0	0	0	0	0	0	0	1	0.006742	0	0	1	0
20338	2	3	306	24170	259.88	0	0	0	0	1	254224	1	254.224	0	0	0	1.265	5	3	60	0	1	1	3	0	1	0	0	0	0	1	0	0	0	0	0	0	0	0	1	0.006742	0	0	1	0
20339	2	3	306	24170	259.88	0	0	0	0	1	391206	1	391.206	0	0	0	2.858	5	3	65	0	1	1	3	0	1	0	0	0	0	1	0	0	0	0	0	1	0	0	1	0.006742	0	0	1	0
20340	2	3	306	24170	259.88	0	0	0	0	1	44480	1	44.48	0	0	0	0.637	5	3	46	0	7	1	3	0	1	0	0	0	0	1	0	1	0	0	0	0	0	0	1	0.006742	0	0	1	0
20341	2	3	306	24170	259.88	0	0	0	0	1	198280	1	198.28	0	0	0	2.832	2	1.5	68	1	10	1	3	0	1	0	0	0	0	1	0	0	0	0	0	0	0	0	1	0.006742	0	0	1	0
20374	2	3	306	24175	3723	0	0	0	0	1	incomplete data	0				0	0.025	3	2	56	0	5	1	3	0	0	0	0	0	1	1	0	0	0	0	0	0	0	0	0	0.006742	0	1	0	1
20375	2	3	306	24175	1533	0	0	0	0	1	121504	1	121.504	0	0	0	1.305	6	3.3	42	0	5	1	3	0	0	0	1	0	0	1	0	0	0	0	0	0	0	0	1	0.006742	0	0	1	0
20376	2	3	306	24175	985.5	0	0	0	0	1	235740	1	235.74	5	1	0	1.062	5	2.8	45	0	8	1	3	0	1	0	0	0	0	1	0	0	0	0	0	0	0	0	1	0.006742	0	0	1	0
20377	2	3	306	24175	985.5	0	0	0	0	1	546160	1	546.16	0	0	0	2.044	3	2	53	0	6	1	3	0	1	0	0	0	0	1	0	1	0	0	0	0	0	0	1	0.006742	0	0	1	0
20378	2	3	306	24175	219	1	0	0	0	0	incomplete data	0				0	0.004	5	3	42	0	5	1	3	1	0	0	0	1	0	1	0	1	0	0	0	0	0	0	1	0.006742	0	1	0	1
20379	2	3	306	24175	5694	1	0	0	0	0	incomplete data	0				0	0.01	5	3	50	0	6	1	3	1	0	0	0	1	0	1	0	1	0	0	0	0	0	0	1	0.006742	0	1	0	1
20380	2	3	306	24175	657	0	0	0	0	1	26920	1	26.92	0	0	0	0.86	6	3.5	76	0	5	1	3	0	1	0	0	0	0	1	0	0	0	0	0	0	0	0	1	0.006742	0	0	1	0
20381	2	3	306	24175	1095	1	0	0	0	0	125660	1	125.66	0	0	0	1.839	5	3	65	0	7	1	3	0	1	0	0	0	0	1	0	0	0	0	0	0	0	0	1	0.006742	0	0	1	0
20510	2	3	306	24193	115.5	0	0	0	0	1	incomplete data	0				0	0.003	5	2.4	40	0	8	1	3	0	0	0	0	1	0	1	0	0	0	0	0	0	0	0	1	0.006742	0	1	0	1
20511	2	3	306	24193	2252.25	1	0	0	0	0	incomplete data	0				1	0.01	3	1.8	23	0	6	1	3	0	0	0	0	1	0	1	0	0	0	0	0	0	0	0	1	0.006742	0	1	0	1
20512	2	3	306	24193	2252.25	1	0	0	0	0	8600	1	8.6	0	0	0	0.012	4	2.1	28	0	6	1	3		0	0	0	1	0	1	0	0	0	0	0	0	0	0	1	0.006742	0	0	1	0
20513	2	3	306	24193	115.5	1	0	0	0	0	111684	1	111.684	0	0	0	0.809	6	3.3	70	0	1	1	3	0	1	0	0	0	0	1	0	0	0	0	0	0	0	0	1	0.006742	0	0	1	0
20514	2	3	306	24193	115.5	1	0	0	0	0	203488	1	203.488	0	0	0	5.423	4	2.5	60	0	1	1	3	0	1	0	0	0	0	1	0	0	0	0	0	0	1	0	1	0.006742	0	0	1	0
20515	2	3	306	24193	115.5	1	0	0	0	0	246300	1	246.3	5	1	0	3.035	5	3	60	0	11	1	3	0	1	0	0	0	0	1	0	0	0	0	0	0	0	0	1	0.006742	0	0	1	0
20516	2	3	306	24193	115.5	0	0	0	0	1	961286	0		0	0	0	12.141	5	2.6	65	0	12	1	3	0	1	0	0	0	0	1	0	1	0	0	0	0	0	0	1	0.006742	0	1	0	1
20517	2	3	306	24193	115.5	0	0	0	0	1	360020	1	360.02	0	0	0	6.475	4	2.5	55	0	8	1	3	0	1	0	0	0	0	1	0	0	0	0	0	0	1	0	1	0.006742	0	0	1	0
20558	2	3	306	24199	273.75	0	0	0	1	0	23075	1	23.075	5	1	0	0.025	4	2.1	28	0	6	1	3	0	0	1	0	0	0	1	0	0	0	0	0	0	0	0	1	0.006742	0	0	1	0
20559	2	3	306	24199	273.75	0	0	0	1	0	48705	1	48.705	0	0	0	0.809	3	2	45	1	1	1	3	0	0	1	0	0	0	1	0	0	0	0	0	0	0	0	1	0.006742	0	0	1	0
20560	2	3	306	24199	164.25	0	0	0	1	0	23320	1	23.32	0	0	0	0.435	5	3	45	0	1	1	3	0	0	1	0	0	0	1	0	0	0	0	0	0	0	0	1	0.006742	0	0	1	0
20561	2	3	306	24199	164.25	0	0	0	0	1	41325	1	41.325	0	0	0	1.032	5	3	58	0	7	1	3	0	0	1	0	0	0	1	0	0	0	0	0	0	0	0	1	0.006742	0	0	1	0
20562	2	3	306	24199	109.5	0	0	0	1	0	63890	1	63.89	10	1	0	0.985	3	2	60	0	12	1	3	0	1	0	0	0	0	1	0	0	0	0	0	0	0	0	1	0.006742	0	0	1	0
20563	2	3	306	24199	109.5	0	0	0	1	0	140145	1	140.145	0	0	0	3.49	6	3.3	57	0	12	1	3	0	1	0	0	0	0	1	0	0	0	0	0	0	0	0	1	0.006742	0	0	1	0
20564	2	3	306	24199	109.5	0	0	0	1	0	117826	1	117.826	0	0	0	1.1	2	1.5	45	0	6	1	3	0	0	1	0	0	0	1	0	0	0	0	0	0	0	0	1	0.006742	0	0	1	0
20565	2	3	306	24199	109.5	0	0	0	1	0	520075	1	520.075	0	0	0	4.326	4	2.5	41	0	10	1	3	0	1	0	0	0	0	1	0	0	0	0	0	0	0	0	1	0.006742	0	0	1	0
20454	2	3	307	24186	136	1	0	0	0	0	incomplete data	0				0	0.064	9	4.4	52	0	1	1	3	1	0	0	0	1	0	1	0	0	0	0	0	0	0	0	1	0.0042099	0	1	0	1
20455	2	3	307	24186	544	0	0	0	0	1	15250	1	15.25	0	0	0	0.859	6	3.1	70	1	1	1	3	0	1	0	0	0	0	1	0	0	0	0	0	0	0	0	1	0.0042099	1	0	1	0
20456	2	3	307	24186	544	1	0	0	0	0	incomplete data	0				1	0.025	3	2	60	0	1	1	1	1	0	0	0	1	0	1	0	0	0	0	0	0	0	0	1	0.0042099	0	1	0	1
20457	2	3	307	24186	136	0	0	0	0	1	166250	1	166.25	0	0	0	2.108	5	2.6	30	0	7	1	3	0	1	0	0	0	0	1	0	0	0	0	0	0	0	0	1	0.0042099	1	0	1	0
20458	2	3	307	24186	136	0	0	0	0	1	307290	1	307.29	4	1	0	12.14	9	5	85	0	1	1	3	0	1	0	0	0	0	1	0	0	0	0	0	0	0	0	1	0.0042099	1	0	1	0
20459	2	3	307	24186	453.33	0	0	0	0	1	217340	1	217.34	0	0	0	4.24	4	2.5	85	0	1	1	3	0	1	0	0	0	0	1	0	0	0	0	0	0	0	0	1	0.0042099	1	0	1	0
20460	2	3	307	24186	453.33	0	0	0	0	1	220100	1	220.1	0	0	0	3.237	8	3.9	32	0	7	1	3	0	1	0	0	0	0	1	0	0	0	0	0	0	0	0	1	0.0042099	1	0	1	0
20461	2	3	307	24186	453.33	0	0	0	0	1	462450	1	462.45	5	1	0	5.261	3	2	85	0	1	1	3	0	1	0	0	0	0	1	0	1	0	0	0	1	0	0	1	0.0042099	1	0	1	0
20462	2	3	307	24187	1702	0	0	0	0	1	incomplete data	0				0	0.201	2	1.5	68	0	5	1	3	0	0	0	0	0	1	1	0	1	0	0	0	1	0	0	1	0.0042099	0	1	0	1
20463	2	3	307	24187	1702	0	0	0	1	0	incomplete data	0				0	0.008	7	4	70	0	6	1	2	0	0	0	1	0	0	1	0	1	0	0	0	1	0	0	1	0.0042099	0	1	0	1
20464	2	3	307	24187	2294	0	0	0	0	1	93440	1	93.44	0	0	0	1.265	4	2.3	42	0	10	1	3	0	1	0	0	0	0	1	0	0	0	0	0	0	0	0	1	0.0042099	1	0	1	0
20465	2	3	307	24187	2294	0	0	0	0	1	662980	0		0	0	0	0.826	5	3	56	0	6	1	3	0	1	0	0	0	0	1	0	0	0	0	0	0	0	0	1	0.0042099	0	1	0	1
20466	2	3	307	24187	666	0	0	0	0	1	1100000	0		2	1	0	1.26	5	3	50	0	10	1	3	0	1	0	0	0	0	1	0	0	0	0	0	1	0	0	1	0.0042099	0	1	0	1
20467	2	3	307	24187	666	0	0	0	0	1	68390	1	68.39	0	0	0	1.011	10	4.9	60	0	1	1	3	0	1	0	0	0	0	1	0	0	0	0	0	0	0	0	1	0.0042099	1	0	1	0
20468	2	3	307	24187	444	0	0	0	0	1	238650	1	238.65	0	0	0	0.809	5	3	78	0	8	1	3	0	1	0	0	0	0	1	0	0	0	0	0	0	0	0	1	0.0042099	1	0	1	0
20469	2	3	307	24187	444	0	0	0	0	1	1300000	0		0	0	0	0.843	7	3.8	70	0	1	1	3	0	1	0	0	0	0	1	0	0	0	0	0	0	0	0	1	0.0042099	0	1	0	1
22601	2	3	307	24523	544	0	0	0	1	0	incomplete data	0				0	0.067	5	2.8	65	0	6	1	3	0	0	0	1	0	0	1	0	0	0	0	0	0	0	0	1	0.0042099	0	1	0	1
22602	2	3	307	24523	544	0	0	0	1	0	incomplete data	0				1	0.007	5	2.6	30	0	5	1	2	1	0	0	0	1	0	1	0	0	0	0	0	0	0	0	1	0.0042099	0	1	0	1
22603	2	3	307	24523	1768	0	0	0	0	1	incomplete data	0				1	0.008	2	1.5	72	1	7	1	3		0	0	0	0	1	1	0	0	0	0	0	0	0	0	1	0.0042099	0	1	0	1
22604	2	3	307	24523	1768	0	0	0	1	0	6950	1	6.95	0	0	0	0.302	6	3.1	55	1	6	1	3	0	1	0	0	0	0	1	0	0	0	0	0	0	0	0	1	0.0042099	1	0	1	0
22605	2	3	307	24523	181.34	0	0	0	0	1	15500	1	15.5	0	0	0	1.315	7	3.6	75	0	7	1	3	0	1	0	0	0	0	0	0	0	0	0	0	0	0	0	1	0.0042099	1	0	1	0
22606	2	3	307	24523	181.34	0	0	0	0	1	105800	1	105.8	0	0	0	2.046	3	2	50	0	13	1	3	0	0	0	0	1	0	1	0	0	0	0	0	0	0	0	1	0.0042099	1	0	1	0
22607	2	3	307	24523	181.34	0	0	0	0	1	16350	1	16.35	0	0	1	0.333	11	5.2	62	0	7	1	2	0	0	0	0	0	1	1	0	0	0	0	0	0	0	0	0	0.0042099	1	0	1	0
22608	2	3	307	24523	136	0	0	0	0	1	60800	1	60.8	0	0	0	9.004	9	4.4	65	0	10	1	3	0	1	0	0	0	0	1	0	0	0	0	0	0	0	0	1	0.0042099	1	0	1	0
22625	2	3	307	24526	3256	0	0	0	0	1	54960	1	54.96	0	0	0	0.86	6	3.3	50	0	10	1	3	0	1	0	0	0	0	1	0	0	0	0	0	0	0	0	1	0.0042099	1	0	1	0
22626	2	3	307	24526	3256	0	0	0	0	1	27250	1	27.25	0	0	0	0.412	6	3.3	50	0	1	1	3	0	0	0	0	1	0	1	0	0	0	0	0	0	0	0	1	0.0042099	1	0	1	0
22627	2	3	307	24526	1554	0	0	0	0	1	85500	1	85.5	0	0	0	1.071	6	3.5	53	0	7	1	3	0	0	0	0	1	0	1	0	0	0	0	0	0	0	0	1	0.0042099	1	0	1	0
22628	2	3	307	24526	1554	0	0	0	0	1	59410	1	59.41	0	0	0	0.91	10	4.9	74	0	7	1	3	0	1	0	0	0	0	1	0	0	0	0	0	0	0	0	1	0.0042099	1	0	1	0
22629	2	3	307	24526	185	0	0	0	0	1	206700	1	206.7	8	1	0	2.448	3	2	52	0	12	1	3	0	1	0	0	0	0	1	0	0	0	0	0	0	0	0	1	0.0042099	1	0	1	0
22630	2	3	307	24526	185	0	0	0	0	1	17750	1	17.75	10	1	0	8.484	6	2.9	75	0	12	1	3	0	0	0	0	1	0	1	0	0	0	0	0	0	0	0	1	0.0042099	1	0	1	0
22631	2	3	307	24526	185	0	0	0	0	1	162400	1	162.4	8	1	0	2.063	6	3.3	22	0	10	1	3	0	1	0	0	0	0	1	0	0	0	0	0	0	0	0	1	0.0042099	1	0	1	0
22632	2	3	307	24526	185	0	0	0	0	1	33700	1	33.7	0	0	0	0.515	7	3.8	90	0	1	1	3	0	1	0	0	0	0	1	0	0	0	0	0	0	0	0	1	0.0042099	1	0	1	0
20470	2	3	308	24188	327	1	0	0	0	0	incomplete data	0				0	0.004	2	1.5	28	0	7	1	3		0	0	1	0	0	1	0	0	0	0	0	0	0	0	1	0	0	1	0	1
20471	2	3	308	24188	327	1	0	0	0	0	incomplete data	0				0	0.002	5	3	43	0	7	1	3	1	0	0	0	1	0	1	0	0	0	0	0	0	0	0	1	0	0	1	0	1
20472	2	3	308	24188	7194	1	0	0	0	0	incomplete data	0				0	0.008	7	4	50	0	1	1	3	1	0	0	0	1	0	1	0	0	0	0	0	0	0	0	1	0	0	1	0	1
20473	2	3	308	24188	1090	0	0	0	0	1	16670	1	16.67	0	0	0	0.809	7	3.8	57	0	1	1	3	0	1	0	0	0	0	1	0	0	0	0	0	0	0	0	1	0	1	0	1	0
20474	2	3	308	24188	2180	0	0	0	0	1	incomplete data	0				0	0.024	4	2.1	32	0	7	1	3	0	0	0	0	1	0	1	0	0	0	0	0	0	0	0	1	0	0	1	0	1
20475	2	3	308	24188	18312	0	0	0	0	1	-4050	1	-4.05	0	0	1	0.035	8	4.1	65	0	6	1	3	0	0	1	0	0	0	0	0	0	0	0	0	0	0	0	1	0	1	0	1	0
20476	2	3	308	24188	7848	0	0	0	0	1	incomplete data	0				0	1.062	2	1.5	45	0	7	1	3	0	0	1	0	0	0	0	0	0	0	0	0	0	0	0	1	0	0	1	0	1
20477	2	3	308	24188	16350	0	0	0	0	1	238455	1	238.455	0	0	0	2.934	5	3	70	0	1	1	3	0	1	0	0	0	0	1	0	0	0	0	0	0	0	0	1	0	1	0	1	0
22633	2	3	308	24527	654	0	0	0	0	1	incomplete data	0				1	0.042	4	2.5	47	0	7	1	3	0	0	1	0	0	0	1	0	0	0	0	0	0	0	0	1	0	0	1	0	1
22634	2	3	308	24527	654	0	0	0	0	1	679900	0		0	0	0	0.017	6	3.1	60	0	1	1	3	0	0	0	0	1	0	1	0	0	0	0	0	0	0	0	1	0	0	1	0	1
22635	2	3	308	24527	1853	0	0	0	0	1	incomplete data	0				0	0.824	2	1.5	62	0	10	1	3	0	0	1	0	0	0	1	0	0	0	0	0	0	0	0	1	0	0	1	0	1
22636	2	3	308	24527	1853	0	0	0	0	1	incomplete data	0				1	0.013	8	3.9	50	0	7	1	3	1	0	1	0	0	0	1	0	0	0	0	0	0	0	0	1	0	0	1	0	1
22637	2	3	308	24527	763	0	0	0	0	1	incomplete data	0				1	0.008	4	2.3	38	0	6	1	3	0	0	1	0	0	0	1	0	0	0	0	0	0	0	0	1	0	0	1	0	1
22638	2	3	308	24527	763	0	0	0	0	1	102300	1	102.3	4	1	0	2.022	4	2.5	40	0	7	1	3	0	1	0	0	0	0	1	0	0	0	0	0	0	0	0	1	0	1	0	1	0
22639	2	3	308	24527	1635	0	0	0	0	1	439160	1	439.16	3	1	0	1.113	6	3.3	64	0	10	1	3	0	1	0	0	0	0	1	0	0	0	0	0	0	0	0	1	0	1	0	1	0
22640	2	3	308	24527	1635	0	0	0	0	1	15000	1	15	0	0	0	4.067	5	2.8	90	0	1	1	3	0	0	1	0	0	0	0	0	0	0	0	0	0	0	0	1	0	1	0	1	0
22521	2	3	309	24512	2826	1	0	0	0	0	incomplete data	0				0	0.015	7	3.6	56	0	8	1	3	1	0	0	0	1	0	1	0	0	0	0	0	0	0	1	0	0.0373518	0	1	0	1
22522	2	3	309	24512	157	0	0	0	0	1	incomplete data	0				1	1.682	4	2.3	48	0	6	1	3	0	0	0	0	0	1	1	0	0	0	0	0	0	0	1	0	0.0373518	0	1	0	1
22523	2	3	309	24512	392.5	0	0	0	0	1	468725	1	468.725	8	1	0	0.732	7	4	65	0	7	1	3	0	1	0	0	0	0	1	0	0	0	0	0	0	0	0	1	0.0373518	1	0	1	0
22524	2	3	309	24512	314	1	0	0	0	0	incomplete data	0				1	0.004	4	2.1	40	0	6	1	3		0	0	0	1	0	1	0	0	0	0	0	0	0	0	1	0.0373518	0	1	0	1
22525	2	3	309	24512	314	1	0	0	0	0	incomplete data	0				1	0.004	4	2.3	35	0	6	1	3	1	0	0	0	1	0	1	0	0	0	0	0	0	0	0	1	0.0373518	0	1	0	1
22526	2	3	309	24512	11304	1	0	0	0	0	incomplete data	0				1	0.034	6	3.3	70	1	6	1	3	0	0	0	0	1	0	1	0	0	0	0	0	0	0	0	1	0.0373518	0	1	0	1
22527	2	3	309	24512	314	0	0	0	0	1	incomplete data	0				1	1.113	9	4.6	63	0	8	1	3	0	0	0	0	0	0	1	0	0	0	0	0	0	0	0	1	0.0373518	0	1	0	1
22528	2	3	309	24512	1570	0	0	0	0	1	214720	1	214.72	8	1	0	3.321	2	1.5	28	0	10	1	3	0	1	0	0	0	0	1	0	0	0	0	0	0	0	0	1	0.0373518	1	0	1	0
22537	2	3	309	24514	4032	1	0	0	0	0	15700	1	15.7	5	1	0	0.043	5	3	53	0	1	1	3	1	0	0	0	1	0	0	0	0	0	0	0	0	0	0	1	0.0373518	1	0	1	0
22538	2	3	309	24514	4032	0	0	0	0	1	1380	1	1.38	0	0	0	0.013	4	2.5	45	0	10	1	3	0	0	0	0	1	0	1	0	0	0	0	0	0	0	0	1	0.0373518	1	0	1	0
22539	2	3	309	24514	192	1	0	0	0	0	-13780	1	-13.78	10	1	0	0.013	8	4.5	45	0	7	1	3	1	1	0	0	0	0	1	0	0	0	0	0	0	0	0	0	0.0373518	1	0	1	0
22540	2	3	309	24514	614.4	0	0	0	1	0	177820	1	177.82	0	0	0	2.895	13	7	72	0	5	1	3	1	1	0	0	0	0	1	0	0	0	0	0	0	0	0	1	0.0373518	1	0	1	0
22541	2	3	309	24514	614.4	0	0	0	0	1	374620	1	374.62	0	0	0	3.743	10	4.9	75	0	1	1	3	0	1	0	0	0	0	1	0	0	0	0	0	0	0	0	1	0.0373518	1	0	1	0
22542	2	3	309	24514	614.4	0	0	0	0	1	145800	1	145.8	0	0	0	4.085	5	2.8	40	0	5	1	3	1	1	0	0	0	0	1	0	0	0	0	0	0	0	0	1	0.0373518	1	0	1	0
22543	2	3	309	24514	614.4	0	0	0	0	1	661800	0		0	0	0	5.767	5	3	60	0	6	1	3		1	0	0	0	0	1	0	0	0	0	0	0	0	0	1	0.0373518	0	1	0	1
22544	2	3	309	24514	614.4	0	0	0	0	1	238500	1	238.5	6	1	0	2.833	5	3	43	0	6	1	3	0	1	0	0	0	0	1	0	0	0	0	0	0	0	0	1	0.0373518	1	0	1	0
22641	2	3	309	24528	749.25	0	0	0	0	1	incomplete data	0				0	0.485	10	4.7	68	1	6	1	3	0	0	0	0	1	0	0	0	0	0	0	0	0	0	0	1	0.0373518	0	1	0	1
22642	2	3	309	24528	749.25	1	0	0	0	0	incomplete data	0				1	0.009	8	4.1	59	0	7	1	3	1	0	0	0	1	0	0	0	0	0	0	0	0	0	0	1	0.0373518	0	1	0	1
22643	2	3	309	24528	416.25	0	0	0	0	1	295950	1	295.95	8	1	0	1.036	4	2.5	46	0	10	1	3	0	1	0	0	0	0	1	0	0	0	0	0	0	0	0	0	0.0373518	1	0	1	0
22644	2	3	309	24528	416.25	0	0	0	0	1	162325	1	162.325	0	0	0	1.458	4	2.5	70	0	10	1	3	0	1	0	0	0	0	1	0	0	0	0	0	0	0	0	1	0.0373518	1	0	1	0
22645	2	3	309	24528	749.25	0	0	0	0	1	252610	1	252.61	16	1	0	2.833	3	2	53	0	8	1	3	0	1	0	0	0	0	1	0	0	0	0	0	0	0	0	1	0.0373518	1	0	1	0
22646	2	3	309	24528	749.25	0	0	0	0	1	1000000	0		16	1	0	3.035	6	3.5	54	0	7	1	3	0	1	0	0	0	0	1	0	0	0	0	1	0	0	0	1	0.0373518	0	1	0	1
22647	2	3	309	24528	749.25	0	0	0	0	1	350250	1	350.25	4	1	0	2.875	4	2.5	50	0	10	1	3	0	1	0	0	0	0	1	0	0	0	0	0	0	0	0	1	0.0373518	1	0	1	0
22648	2	3	309	24528	749.25	0	0	0	0	1	156570	1	156.57	0	0	0	1.659	5	3	54	0	6	1	3	0	1	0	0	0	0	1	0	0	0	0	0	0	0	0	1	0.0373518	1	0	1	0
22703	2	3	309	24541	3061.5	0	0	0	0	1	85370	1	85.37	4	1	0	0.455	3	2	55	0	8	1	3	0	0	1	0	0	0	1	0	0	0	0	0	0	0	0	1	0.0373518	1	0	1	0
22704	2	3	309	24541	628	0	0	0	0	1	8000	1	8	0	0	0	1.052	2	1.5	50	0	7	1	3	0	0	1	0	0	0	0	0	0	0	0	0	0	0	0	1	0.0373518	1	0	1	0
22705	2	3	309	24541	981.25	0	0	0	0	1	632390	0		8	1	0	3.237	6	3.5	70	0	8	1	3	0	1	0	0	0	0	1	0	0	0	0	0	0	0	0	1	0.0373518	0	1	0	1
22706	2	3	309	24541	981.25	0	0	0	0	1	199205	1	199.205	8	1	0	1.333	7	3.6	62	0	8	1	3	0	1	0	0	0	0	1	0	0	0	0	0	0	0	0	1	0.0373518	1	0	1	0
22707	2	3	309	24541	5024	0	0	0	0	1	incomplete data	0				0	0.042	2	1.5	65	0	1	1	3	1	0	0	0	1	0	1	0	0	0	0	0	0	0	0	1	0.0373518	0	1	0	1
22708	2	3	309	24541	1884	0	0	0	0	1	336220	1	336.22	10	1	0	2.116	5	3	53	0	12	1	3	0	1	0	0	0	0	1	0	0	0	0	0	0	0	0	1	0.0373518	1	0	1	0
22709	2	3	309	24541	1334.5	0	0	0	0	1	443200	1	443.2	0	0	0	2.089	5	2.8	66	0	1	1	3	0	1	0	0	0	0	1	0	0	0	0	0	0	0	0	1	0.0373518	1	0	1	0
22710	2	3	309	24541	1334.5	0	0	0	0	1	301750	1	301.75	4	1	0	1.922	8	4.3	85	0	1	1	3	0	1	0	0	0	0	1	0	0	0	0	0	0	0	0	1	0.0373518	1	0	1	0
22711	2	3	309	24542	6144	0	0	0	0	1	-800	1	-0.8	0	0	0	0.708	6	3.3	38	0	6	1	3	0	0	1	0	0	0	0	0	0	0	0	0	0	0	0	1	0.0373518	1	0	1	0
22712	2	3	309	24542	6144	0	0	0	0	1	incomplete data	0				0	0.02	7	3.6	60	0	1	1	3	1	0	1	0	0	0	0	0	0	0	0	0	0	0	0	1	0.0373518	0	1	0	1
22713	2	3	309	24542	864	0	0	0	0	1	22430	1	22.43	0	0	0	1.353	6	3.3	60	0	12	1	3	0	1	0	0	0	0	1	0	0	0	0	0	0	0	0	1	0.0373518	1	0	1	0
22714	2	3	309	24542	864	1	0	0	0	0	62980	1	62.98	0	0	0	0.857	5	3	42	0	7	1	3	1	1	0	0	0	0	1	0	0	0	0	0	0	0	0	1	0.0373518	1	0	1	0
22715	2	3	309	24542	528	1	0	0	0	0	-309100	0		10	1	0	0.04	5	3	43	0	7	1	3		1	0	0	0	0	1	0	0	0	0	0	1	0	0	1	0.0373518	0	1	0	1
22716	2	3	309	24542	528	0	0	0	0	1	33600	1	33.6	0	0	0	2.073	5	3	44	0	6	1	3	0	0	1	0	0	0	0	0	0	0	0	0	0	0	0	1	0.0373518	1	0	1	0
22717	2	3	309	24542	528	0	0	0	0	1	200	1	0.2	0	0	0	3.085	8	4.1	80	0	1	1	3	0	0	0	0	0	0	0	0	0	0	0	0	0	0	0	1	0.0373518	1	0	1	0
22718	2	3	309	24542	528	0	0	0	0	1	286785	1	286.785	10	1	0	2.302	14	7.5	83	0	1	1	3	0	1	0	0	0	0	1	0	0	0	0	0	0	0	0	1	0.0373518	1	0	1	0
22727	2	3	309	24544	2664	0	0	0	0	1	37682	1	37.682	0	0	0	0.042	9	4.6	54	0	5	1	3	0	1	0	0	0	0	1	0	0	0	0	0	1	0	0	1	0.0373518	1	0	1	0
22728	2	3	309	24544	2664	0	0	0	0	1	1350	1	1.35	0	0	0	0.101	6	3.1	42	0	8	1	3	0	0	1	0	0	0	0	0	0	0	0	0	0	0	0	1	0.0373518	1	0	1	0
22729	2	3	309	24544	915.75	0	0	0	0	1	80482	1	80.482	0	0	0	2.012	4	2.5	44	0	6	1	3	0	0	0	0	0	1	1	0	0	0	0	0	1	0	0	1	0.0373518	1	0	1	0
22730	2	3	309	24544	915.75	0	0	0	0	1	203944	1	203.944	0	0	0	1.726	6	3.3	50	0	6	1	3	0	1	0	0	0	0	1	0	0	0	0	0	1	0	0	1	0.0373518	1	0	1	0
22731	2	3	309	24544	291.38	0	0	0	0	1	141422	1	141.422	0	0	0	1.821	7	3.6	60	0	1	1	3	0	1	0	0	0	0	1	0	0	0	0	0	0	0	0	1	0.0373518	1	0	1	0
22732	2	3	309	24544	291.38	0	0	0	0	1	499100	1	499.1	0	0	0	4.855	7	3.8	82	0	1	1	3	0	1	0	0	0	0	1	0	0	0	0	0	0	0	0	1	0.0373518	1	0	1	0
22733	2	3	309	24544	291.38	0	0	0	0	1	210480	1	210.48	0	0	0	2.023	9	4.8	62	0	5	1	3	0	1	0	0	0	0	1	0	0	0	0	0	0	0	0	1	0.0373518	1	0	1	0
22734	2	3	309	24544	291.38	0	0	0	0	1	163290	1	163.29	0	0	0	1.112	5	3	45	0	8	1	3	0	1	0	0	0	0	1	0	0	0	0	0	0	0	0	1	0.0373518	1	0	1	0
20358	2	3	310	24173	3876	0	0	0	0	1	13650	1	13.65	0	0	0	0.325	6	2.7	37	0	7	1	3	0	0	1	0	0	0	1	0	0	0	0	0	0	0	0	1	0	1	0	1	0
20359	2	3	310	24173	714	0	0	0	0	1	91792	1	91.792	4	1	0	1.214	5	2.8	26	0	6	1	3	0	1	0	0	0	0	1	0	0	0	0	0	0	0	0	1	0	1	0	1	0
20360	2	3	310	24173	255	0	0	0	0	1	711340	0		4	1	0	6.171	10	5.5	45	0	12	1	3	0	1	0	0	0	0	1	0	0	0	0	0	0	0	0	1	0	0	1	0	1
20361	2	3	310	24173	255	0	0	0	0	1	226920	1	226.92	4	1	0	2.062	8	3.9	70	0	8	1	3	0	1	0	0	0	0	1	0	0	0	0	0	0	0	0	1	0	1	0	1	0
20362	2	3	310	24173	8772	0	0	0	0	1	13550	1	13.55	0	0	0	0.225	5	3	47	0	8	1	3	0	0	0	0	1	0	1	0	0	0	0	0	0	0	0	1	0	1	0	1	0
20363	2	3	310	24173	2244	0	0	0	0	1	114750	1	114.75	0	0	0	1.031	5	2.8	62	0	5	1	3	0	1	0	0	0	0	1	0	0	0	0	0	0	0	0	1	0	1	0	1	0
20364	2	3	310	24173	1122	0	0	0	0	1	324300	1	324.3	8	1	0	2.023	5	3	47	0	5	1	3	0	1	0	0	0	0	1	0	0	0	0	0	0	0	0	1	0	1	0	1	0
20365	2	3	310	24173	1122	0	0	0	0	1	286800	1	286.8	0	0	0	2.088	5	3	50	0	6	1	3	0	1	0	0	0	0	1	0	0	0	0	0	0	0	0	1	0	1	0	1	0
20406	2	3	310	24179	1485	1	0	0	0	0	incomplete data	0				1	0.025	5	3	45	0	6	1	3	0	0	0	0	1	0	1	0	0	0	0	0	0	0	0	1	0	0	1	0	1
20407	2	3	310	24179	55	0	0	0	0	1	140036	1	140.036	8	1	0	1.2	6	2.9	58	0	6	1	3	0	1	0	0	0	0	1	0	0	0	0	0	0	0	0	1	0	1	0	1	0
20408	2	3	310	24179	55	0	0	0	0	1	129450	1	129.45	8	1	0	1.05	1	1	56	0	6	1	3	0	1	0	0	0	0	1	0	0	0	0	0	0	0	0	1	0	1	0	1	0
20409	2	3	310	24179	55	0	0	0	0	1	125268	1	125.268	8	1	0	1.15	3	2	54	0	6	1	3	0	1	0	0	0	0	1	0	0	0	0	0	0	0	0	1	0	1	0	1	0
20410	2	3	310	24179	8250	1	0	0	0	0	incomplete data	0				1	0.013	7	4	61	0	5	1	3	1	0	0	0	1	0	1	0	0	0	0	0	0	0	0	1	0	0	1	0	1
20411	2	3	310	24179	275	0	0	0	0	1	239710	1	239.71	4	1	0	18.741	6	3.5	53	0	12	1	3	0	1	0	0	0	0	1	0	0	0	0	0	0	0	0	1	0	1	0	1	0
20412	2	3	310	24179	275	0	0	0	0	1	220810	1	220.81	4	1	0	2.092	11	5.6	52	0	1	1	3	0	0	0	1	0	0	1	0	0	0	0	0	0	0	0	1	0	1	0	1	0
20413	2	3	310	24179	275	0	0	0	0	1	202900	1	202.9	9	1	0	0.055	5	3	50	0	1	1	3	0	1	0	0	0	0	1	0	0	0	0	0	0	0	1	1	0	1	0	1	0
20534	2	3	310	24196	1815	1	0	0	0	0	incomplete data	0				0	0.018	5	2.8	48	0	1	1	3	1	0	1	0	0	0	1	0	1	0	0	0	0	1	0	1	0	0	1	0	1
20535	2	3	310	24196	55	0	0	0	0	1	563840	0		8	1	0	2.075	4	2.5	65	0	1	1	3	0	1	0	0	0	0	1	0	0	0	0	0	0	0	0	1	0	0	1	0	1
20536	2	3	310	24196	55	0	0	0	0	1	380908	1	380.908	8	1	0	3.051	6	3.1	60	0	1	1	3	0	1	0	0	0	0	1	0	0	0	0	0	0	0	1	1	0	1	0	1	0
20537	2	3	310	24196	55	0	0	0	0	1	377536	1	377.536	4	1	0	3.592	6	3.5	85	0	1	1	3	0	1	0	0	0	0	1	0	0	0	0	0	0	0	1	1	0	1	0	1	0
20538	2	3	310	24196	55	0	0	0	0	1	413230	1	413.23	4	1	0	3.388	4	2.5	44	0	6	1	3	0	1	0	0	0	0	1	0	0	0	0	0	0	0	0	1	0	1	0	1	0
20539	2	3	310	24196	55	0	0	0	0	1	579240	0		0	0	0	3.717	6	3.3	68	0	1	1	3	0	1	0	0	0	0	1	0	0	0	0	0	0	0	0	1	0	0	1	0	1
20540	2	3	310	24196	18315	0	0	0	0	1	incomplete data	0				0	0	5	2.6	67	1	1	0	3	0	0	0	0	1	0	1	0	0	0	0	0	0	0	0	1	0	0	1	0	1
20541	2	3	310	24196	495	0	0	0	0	1	734336	0		0	0	0	3.035	3	2	50	0	10	1	3	0	1	0	0	0	0	1	0	0	0	0	0	0	0	0	0	0	0	1	0	1
20542	2	3	310	24197	102	1	0	0	0	0	incomplete data	0				1	0.004	3	2	50	0	1	1	3	0	0	1	0	0	0	1	0	0	0	0	0	0	0	0	0	0	0	1	0	1
20543	2	3	310	24197	4386	1	0	0	0	0	incomplete data	0				1	0.02	3	2	40	0	1	1	3	0	0	0	0	1	0	1	0	0	0	0	0	0	0	0	0	0	0	1	0	1
20544	2	3	310	24197	408	0	0	0	0	1	92780	1	92.78	0	0	0	1.87	10	4.7	48	0	6	1	3	0	1	0	0	0	0	1	0	0	0	0	0	0	0	0	1	0	1	0	1	0
20545	2	3	310	24197	1428	0	0	0	0	1	110700	1	110.7	0	0	0	2.528	3	2	50	0	8	1	3	0	1	0	0	0	0	1	0	0	0	0	0	0	0	0	1	0	1	0	1	0
20546	2	3	310	24197	9588	0	0	0	0	1	-5120	1	-5.12	0	0	0	0.037	3	2	75	0	1	1	3	0	0	1	0	0	0	1	0	0	0	0	0	0	0	0	1	0	1	0	1	0
20547	2	3	310	24197	2244	0	0	0	0	1	111020	1	111.02	0	0	0	1.516	4	2.1	35	0	8	1	3	0	1	0	0	0	0	1	0	0	0	0	0	0	0	0	0	0	1	0	1	0
20548	2	3	310	24197	1836	0	0	0	0	1	409800	1	409.8	0	0	0	2.123	2	1.5	53	0	10	1	3	0	1	0	0	0	0	1	0	0	0	0	0	0	0	0	1	0	1	0	1	0
20549	2	3	310	24197	1836	0	0	0	0	1	304976	1	304.976	0	0	0	3.662	8	4.1	70	0	10	1	3	0	1	0	0	0	0	1	0	0	0	0	0	0	0	0	1	0	1	0	1	0
20114	2	3	311	24132	4407	0	0	0	1	0	58304	1	58.304	0	0	0	0.47	7	3.8	55	0	1	1	3	0	1	0	0	0	0	1	0	0	0	0	0	0	0	0	1	0.0364343	0	0	1	0
20115	2	3	311	24132	1469	0	0	0	1	0	137580	1	137.58	0	0	0	1.645	5	2.6	75	0	1	1	3	0	1	0	0	0	0	1	0	0	0	0	0	0	0	0	1	0.0364343	0	0	1	0
20116	2	3	311	24132	2599	0	0	0	1	0	215850	1	215.85	0	0	0	2.478	5	3	51	0	8	1	3	0	1	0	0	0	0	1	0	0	0	0	0	0	0	0	1	0.0364343	0	0	1	0
20117	2	3	311	24132	452	1	0	0	0	0	incomplete data	0				0	0.004	5	3	40	0	8	1	3	0	0	0	0	1	0	1	0	0	0	0	0	0	0	0	1	0.0364343	0	1	0	1
20118	2	3	311	24132	452	0	0	0	1	0	incomplete data	0				0	0.004	4	2.1	35	0	1	1	3	0	0	0	0	1	0	1	0	0	0	0	0	0	0	0	1	0.0364343	0	1	0	1
20119	2	3	311	24132	6780	0	0	0	1	0	46872	1	46.872	0	0	0	0.415	4	2.5	40	0	10	1	3	0	0	0	0	1	0	1	0	0	0	0	0	0	0	0	0	0.0364343	0	0	1	0
20120	2	3	311	24132	3390	0	0	0	1	0	142970	1	142.97	0	0	0	1.254	7	4	65	0	1	1	3	0	1	0	0	0	0	1	0	0	0	0	0	0	0	0	1	0.0364343	0	0	1	0
20121	2	3	311	24132	4294	0	0	0	1	0	227055	1	227.055	0	0	0	2.055	5	3	52	0	8	1	3	0	1	0	0	0	0	1	0	0	0	0	0	0	0	0	1	0.0364343	0	0	1	0
20130	2	3	311	24134	4664.5	0	0	0	0	1	88302	1	88.302	0	0	0	0.834	5	3	83	0	1	1	3	0	1	0	0	0	0	1	0	0	0	0	0	0	0	0	1	0.0364343	0	0	1	0
20131	2	3	311	24134	4664.5	0	0	0	0	1	incomplete data	0				1	0.824	1	1	75	0	1	1	3	0	0	1	0	0	0	1	0	0	0	0	0	0	0	0	1	0.0364343	0	1	0	1
20132	2	3	311	24134	2209.5	0	0	0	0	1	96726	1	96.726	16	1	0	1.011	4	2.5	41	0	8	1	3	0	0	0	1	0	0	1	0	0	0	0	0	0	0	0	1	0.0364343	0	0	1	0
20133	2	3	311	24134	2209.5	0	0	0	0	1	167492	1	167.492	8	1	0	1.656	3	1.8	50	0	8	1	3	0	1	0	0	0	0	1	0	0	0	0	0	0	0	0	1	0.0364343	0	0	1	0
20134	2	3	311	24134	797.88	0	0	0	0	1	307300	1	307.3	8	1	0	3.085	4	2.5	40	0	1	1	3	0	1	0	0	0	0	1	0	0	0	0	0	0	0	0	1	0.0364343	0	0	1	0
20135	2	3	311	24134	797.88	0	0	0	0	1	270740	1	270.74	0	0	0	3.06	9	4.4	65	0	7	1	3	0	1	0	0	0	0	1	0	0	0	0	0	0	0	0	1	0.0364343	0	0	1	0
20136	2	3	311	24134	797.88	0	0	0	0	1	361274	1	361.274	4	1	0	3.313	6	3.1	55	0	6	1	3	0	1	0	0	0	0	1	0	0	0	0	0	0	0	0	1	0.0364343	0	0	1	0
20137	2	3	311	24134	797.88	0	0	0	0	1	241094	1	241.094	8	1	0	2.513	5	3	65	0	1	1	3	0	1	0	0	0	0	1	0	0	0	0	0	0	0	0	1	0.0364343	0	0	1	0
20382	2	3	311	24176	3094	1	0	0	0	0	-4870	1	-4.87	0	0	1	0.02	7	3.6	68	0	6	1	3	0	0	0	0	1	0	0	0	0	0	0	0	0	0	0	1	0.0364343	0	0	1	0
20383	2	3	311	24176	276.25	0	0	0	0	1	1100000	0		16	1	0	10.117	3	2	48	0	7	1	3	0	1	0	0	0	0	1	0	0	0	0	0	0	0	0	1	0.0364343	0	1	0	1
20384	2	3	311	24176	276.25	0	0	0	0	1	746200	0		20	1	0	4.047	4	2.5	72	0	1	1	3	0	1	0	0	0	0	1	0	0	0	0	0	0	0	0	1	0.0364343	0	1	0	1
20385	2	3	311	24176	5967	1	0	0	0	0	incomplete data	0				0	0.005	6	2.7	35	0	1	1	3	1	0	0	0	1	0	1	0	0	0	0	0	0	0	0	1	0.0364343	0	1	0	1
20386	2	3	311	24176	1326	0	0	0	1	0	41338	1	41.338	8	1	0	1.249	1	1	50	1	1	1	3	0	1	0	0	0	0	1	0	0	0	0	0	0	0	0	0	0.0364343	0	0	1	0
20387	2	3	311	24176	1326	0	0	0	1	0	49825	1	49.825	8	1	0	0.025	4	2.5	41	0	6	1	3	0	1	0	0	0	0	1	0	0	0	0	0	0	0	0	1	0.0364343	0	0	1	0
20388	2	3	311	24176	2983.5	0	0	0	1	0	149780	1	149.78	12	1	0	2.087	5	2.6	35	0	8	1	3	0	1	0	0	0	0	1	0	0	0	0	0	0	0	0	1	0.0364343	0	0	1	0
20389	2	3	311	24176	2983.5	0	0	0	1	0	208960	1	208.96	8	1	0	2.074	6	3.1	55	0	1	1	3	0	1	0	0	0	0	1	0	0	0	0	0	0	0	0	1	0.0364343	0	0	1	0
20390	2	3	311	24177	3314.25	0	0	0	0	1	incomplete data	0				0	0.025	7	3.4	70	0	1	1	3	0	0	0	1	0	0	1	0	0	0	0	0	0	0	0	1	0.0364343	0	1	0	1
20391	2	3	311	24177	3314.25	0	0	0	0	1	incomplete data	0				0	0.075	5	3	50	0	6	1	3		0	0	0	1	0	1	0	0	0	0	0	0	0	0	1	0.0364343	0	1	0	1
20392	2	3	311	24177	1473	0	0	0	0	1	136200	1	136.2	9	1	0	1.516	11	5.8	80	0	1	1	3	0	1	0	0	0	0	1	0	0	0	0	0	0	0	0	1	0.0364343	0	0	1	0
20393	2	3	311	24177	1473	0	0	0	0	1	181600	1	181.6	16	1	0	1.416	5	2.8	65	0	1	1	3	0	1	0	0	0	0	1	0	0	0	0	0	0	0	0	1	0.0364343	0	0	1	0
20394	2	3	311	24177	1718.5	0	0	0	0	1	254800	1	254.8	0	0	0	1.264	8	4.1	66	0	1	1	3	0	1	0	0	0	0	1	0	0	0	0	0	0	0	0	1	0.0364343	0	0	1	0
20395	2	3	311	24177	1718.5	0	0	0	0	1	242270	1	242.27	0	0	0	2.023	3	2	50	0	1	1	3	0	1	0	0	0	0	1	0	0	0	0	0	0	0	0	1	0.0364343	0	0	1	0
20396	2	3	311	24177	1718.5	0	0	0	0	1	276200	1	276.2	9	1	0	2.243	4	2.5	25	0	10	1	3	0	1	0	0	0	0	1	0	0	0	0	0	0	0	0	1	0.0364343	0	0	1	0
20397	2	3	311	24177	1718.5	0	0	0	0	1	212740	1	212.74	14	1	0	2.092	4	2.3	37	0	5	1	3	0	1	0	0	0	0	1	0	0	0	0	0	0	0	0	1	0.0364343	0	0	1	0
20398	2	3	311	24178	2260	1	0	0	0	0	30850	1	30.85	0	0	0	0.215	6	3.3	47	0	6	1	3	1	1	0	0	0	0	1	0	0	0	0	0	0	0	0	1	0.0364343	0	0	1	0
20399	2	3	311	24178	2260	1	0	0	0	0	incomplete data	0				0	0.025	6	3.5	50	0	1	1	3	1	0	0	1	0	0	1	0	0	0	0	0	0	0	0	1	0.0364343	0	1	0	1
20400	2	3	311	24178	452	0	0	0	1	0	174110	1	174.11	4	1	0	1.625	4	2.3	40	0	5	1	3	0	1	0	0	0	0	1	0	0	0	0	0	0	0	0	1	0.0364343	0	0	1	0
20401	2	3	311	24178	452	0	0	0	1	0	70590	1	70.59	4	1	0	1.237	3	1.8	55	0	7	1	3	0	1	0	0	0	0	1	0	0	0	0	0	0	0	0	1	0.0364343	0	0	1	0
20402	2	3	311	24178	536.75	0	0	0	1	0	729910	0		8	1	0	4.48	4	2.5	42	0	1	1	3	0	1	0	0	0	0	1	0	0	0	0	0	0	0	0	1	0.0364343	0	1	0	1
20403	2	3	311	24178	536.75	0	0	0	1	0	383900	1	383.9	0	0	0	3.575	6	2.9	50	0	5	1	3	1	1	0	0	0	0	1	0	0	0	0	0	0	0	0	1	0.0364343	0	0	1	0
20404	2	3	311	24178	536.75	1	0	0	0	0	64560	1	64.56	4	1	1	0.01	5	3	42	0	1	1	3	1	1	0	0	0	0	1	0	0	0	0	0	0	0	0	1	0.0364343	0	0	1	0
20405	2	3	311	24178	536.75	0	0	0	1	0	720500	0		12	1	0	4.465	4	2.5	46	1	6	1	3	0	1	0	0	0	0	1	0	0	0	0	0	0	0	0	1	0.0364343	0	1	0	1
20550	2	3	311	24198	110.5	1	0	0	0	0	incomplete data	0				1	0.004	7	3	40	0	1	1	3	1	0	0	0	1	0	1	0	0	0	0	0	0	0	0	1	0.0364343	0	1	0	1
20551	2	3	311	24198	5967	1	0	0	0	0	377250	1	377.25	8	1	0	0.015	6	2.7	35	0	1	1	3	0	1	0	0	0	0	1	0	0	0	0	0	0	0	1	1	0.0364343	0	0	1	0
20552	2	3	311	24198	221	0	0	0	0	1	145670	1	145.67	16	1	0	0.012	5	2.6	40	0	7	1	3	0	1	0	0	0	0	1	0	0	0	0	0	0	0	1	1	0.0364343	0	0	1	0
20553	2	3	311	24198	1215.5	0	0	0	1	0	177400	1	177.4	0	0	0	2.035	4	2.5	65	0	6	1	3	0	1	0	0	0	0	1	0	0	0	0	0	0	0	1	0	0.0364343	0	0	1	0
20554	2	3	311	24198	552.5	0	0	0	1	0	incomplete data	0				0	0.004	4	2.3	47	0	1	1	3	0	0	0	0	0	0	1	0	0	0	0	0	0	0	1	0	0.0364343	0	1	0	1
20555	2	3	311	24198	22652.5	1	0	0	0	0	incomplete data	0				0	0.013	8	4.1	35	0	5	1	3	0	0	0	0	1	0	1	0	0	0	0	0	0	0	1	0	0.0364343	0	1	0	1
20556	2	3	311	24198	2210	1	0	0	0	0	112400	1	112.4	0	0	0	0.025	6	3.5	45	0	10	1	3	0	1	0	0	0	0	1	0	0	0	0	0	0	0	1	0	0.0364343	0	0	1	0
20557	2	3	311	24198	9392.5	0	0	0	0	1	557980	1	557.98	12	1	0	7.49	5	2.6	45	0	13	1	3	0	0	0	0	1	0	1	0	0	0	0	0	0	0	1	1	0.0364343	0	0	1	0
20106	2	3	312	24131	2310	1	0	0	0	0	19800	1	19.8	0	0	0	0.227	5	2.4	30	0	6	1	3	1	0	0	0	1	0	1	0	0	0	0	0	0	0	1	1	0.0360182	1	0	1	0
20107	2	3	312	24131	605	0	0	0	0	1	108780	1	108.78	0	0	0	1.851	3	1.8	32	0	10	1	3	0	0	0	1	0	0	1	0	0	0	0	0	0	0	1	1	0.0360182	1	0	1	0
20108	2	3	312	24131	605	0	0	0	0	1	721543	0		0	0	0	6.626	9	4.4	56	0	8	1	3	0	1	0	0	0	0	1	0	0	0	0	0	0	1	1	1	0.0360182	0	1	0	1
20109	2	3	312	24131	605	0	0	0	0	1	393555	1	393.555	0	0	0	4.048	4	2.5	45	0	8	1	3	0	1	0	0	0	0	1	0	0	0	0	0	0	0	1	1	0.0360182	1	0	1	0
20110	2	3	312	24131	4785	1	0	0	0	0	incomplete data	0				0	0.013	6	2.9	50	0	1	1	2	1	0	0	0	1	0	1	0	0	0	0	0	0	0	1	1	0.0360182	0	1	0	1
20111	2	3	312	24131	1815	1	0	0	0	0	63980	1	63.98	0	0	0	1.515	7	3.4	65	0	6	1	3	1	1	0	0	0	0	1	0	0	0	0	0	0	0	1	1	0.0360182	1	0	1	0
20112	2	3	312	24131	2557.5	0	0	0	0	1	2000000	0		22	1	0	20.361	14	7.1	80	1	1	1	3	0	1	0	0	0	0	1	0	0	0	0	0	0	1	1	1	0.0360182	0	1	0	1
20113	2	3	312	24131	2557.5	0	0	0	0	1	381504	1	381.504	0	0	0	2.681	4	2.5	53	0	6	1	3	0	1	0	0	0	0	1	0	0	0	0	0	0	0	1	1	0.0360182	1	0	1	0
20138	2	3	312	24135	2178	1	0	0	0	0	16132	1	16.132	0	0	0	0.005	3	2	45	0	1	1	3	1	1	0	0	0	0	1	0	0	0	0	0	0	0	0	0	0.0360182	1	0	1	0
20139	2	3	312	24135	121	0	0	0	0	1	177642	1	177.642	0	0	0	1.631	6	3.5	42	0	8	1	3	0	0	0	0	1	0	1	0	0	0	0	0	0	0	0	1	0.0360182	1	0	1	0
20140	2	3	312	24135	121	0	0	0	0	1	50050	1	50.05	0	0	0	1.264	7	3.6	70	0	1	1	3	0	1	0	0	0	0	1	0	0	0	0	0	0	0	1	1	0.0360182	1	0	1	0
20141	2	3	312	24135	847	0	0	0	0	1	108012	1	108.012	0	0	0	0.859	4	2.3	37	0	7	1	3	0	1	0	0	0	0	1	0	0	0	0	0	0	0	1	1	0.0360182	1	0	1	0
20142	2	3	312	24135	847	0	0	0	0	1	525740	1	525.74	0	0	0	4.147	6	3.5	65	0	6	1	3	0	1	0	0	0	0	1	0	0	0	0	0	0	0	1	1	0.0360182	1	0	1	0
20143	2	3	312	24135	4114	1	0	0	0	0	incomplete data	0				0	0.018	7	4	42	0	6	1	3	1	0	0	1	0	0	1	0	0	0	0	0	0	0	1	1	0.0360182	0	1	0	1
20144	2	3	312	24135	847	0	0	0	0	1	538040	1	538.04	0	0	0	7.115	7	3.8	51	0	6	1	3	0	1	0	0	0	0	1	0	0	0	0	0	0	0	1	1	0.0360182	1	0	1	0
20145	2	3	312	24135	847	0	0	0	0	1	2100000	0		28	1	0	23.476	5	2.8	55	0	8	1	3	0	1	0	0	0	0	1	0	0	0	0	0	0	0	0	1	0.0360182	0	1	0	1
20430	2	3	312	24182	2178	1	0	0	0	0	42170	1	42.17	0	0	0	0.025	5	3	40	0	1	1	3	1	1	0	0	0	0	1	0	0	0	0	0	0	0	1	1	0.0360182	1	0	1	0
20431	2	3	312	24182	2178	0	0	0	0	1	incomplete data	0				0	3.44	2	1.5	45	0	5	1	3	0	0	0	0	0	0	1	0	0	0	0	0	0	0	1	1	0.0360182	0	1	0	1
20432	2	3	312	24182	302.5	0	0	0	1	0	175400	1	175.4	5	1	0	1.567	10	4.9	47	0	8	1	3	1	1	0	0	0	0	1	0	0	0	0	0	0	0	1	1	0.0360182	1	0	1	0
20433	2	3	312	24182	302.5	1	0	0	0	0	incomplete data	0				0	0.025	6	3.3	62	0	1	1	3	1	0	0	0	1	0	1	0	0	0	0	0	0	0	1	1	0.0360182	0	1	0	1
20434	2	3	312	24182	529.38	0	0	0	0	1	559035	1	559.035	22	1	0	8.094	4	2.5	51	0	11	1	3	0	1	0	0	0	0	1	0	0	0	0	0	0	0	1	1	0.0360182	1	0	1	0
20435	2	3	312	24182	529.38	0	0	0	0	1	1100000	0		4	1	0	22.259	8	4.3	52	0	11	1	3	0	1	0	0	0	0	1	0	0	0	0	0	0	0	1	1	0.0360182	0	1	0	1
20436	2	3	312	24182	529.38	0	0	0	0	1	570950	0		15	1	0	8.979	6	3.5	68	0	8	1	3	0	1	0	0	0	0	1	0	0	0	0	0	0	0	1	1	0.0360182	0	1	0	1
20437	2	3	312	24182	529.38	0	0	0	0	1	731100	0		16	1	0	11.381	6	3.1	60	0	6	1	3	0	1	0	0	0	0	1	0	0	0	0	0	0	0	1	1	0.0360182	0	1	0	1
20438	2	3	312	24184	2310	0	0	0	1	0	incomplete data	0				0	0.003	4	2.1	36	1	1	1	3	1	0	0	0	1	0	1	0	0	0	0	0	0	0	1	1	0.0360182	0	1	0	1
20439	2	3	312	24184	1155	0	0	0	0	1	incomplete data	0				0	3.502	4	2.5	62	0	1	1	3	0	0	0	0	0	0	1	0	0	0	0	0	0	0	1	1	0.0360182	0	1	0	1
20440	2	3	312	24184	1430	0	0	0	0	1	83960	1	83.96	0	0	0	4.521	6	3.5	57	0	5	1	3	0	1	0	0	0	0	1	0	0	0	0	0	0	0	0	1	0.0360182	1	0	1	0
20441	2	3	312	24184	1430	0	0	0	0	1	159640	1	159.64	0	0	0	2.667	7	3.6	60	0	1	1	3	0	1	0	0	0	0	1	0	0	0	0	0	0	0	1	1	0.0360182	1	0	1	0
20442	2	3	312	24184	14355	0	0	0	0	1	8150	1	8.15	0	0	0	1.897	6	3.3	47	0	6	1	3	0	0	0	0	0	0	0	0	0	0	0	0	0	0	0	1	0.0360182	1	0	1	0
20443	2	3	312	24184	1485	0	0	0	0	1	70815	1	70.815	0	0	0	1.841	2	1.5	62	0	8	1	3	0	0	1	0	0	0	1	0	0	0	0	0	0	0	1	1	0.0360182	1	0	1	0
20444	2	3	312	24184	5940	0	0	0	0	1	375710	1	375.71	10	1	0	8.094	6	3.1	60	0	1	1	3	0	1	0	0	0	0	1	0	0	0	0	0	0	0	1	1	0.0360182	1	0	1	0
20445	2	3	312	24184	5940	0	0	0	0	1	6200	1	6.2	0	0	0	0.885	5	3	60	0	1	1	3	0	1	0	0	0	0	1	0	0	0	0	0	0	0	1	1	0.0360182	1	0	1	0
20098	2	3	313	24130	81	1	0	0	0	0	incomplete data	0				1	0.075	2	1.5	77	0	1	1	3	1	0	1	0	0	0	1	0	0	0	0	0	0	0	0	1	0	0	1	0	1
20099	2	3	313	24130	3240	0	0	0	1	0	17810	1	17.81	4	1	0	0.41	2	1.5	70	0	7	1	3	0	0	0	0	0	0	1	0	0	0	0	0	0	0	1	0	0	1	0	1	0
20100	2	3	313	24130	3240	1	0	0	0	0	incomplete data	0				0	0.013	5	2.4	38	0	1	1	3	1	0	0	0	0	0	1	0	0	0	0	0	0	0	1	0	0	0	1	0	1
20101	2	3	313	24130	810	0	0	0	0	1	68393	1	68.393	0	0	0	1.922	5	3	50	0	5	1	3	1	1	0	0	0	0	1	0	0	0	0	0	0	0	0	1	0	1	0	1	0
20102	2	3	313	24130	810	0	0	0	0	1	81210	1	81.21	8	1	0	1.249	2	1.5	60	0	1	1	3	1	1	0	0	0	0	1	0	0	0	0	0	0	0	0	1	0	1	0	1	0
20103	2	3	313	24130	1350	0	0	0	0	1	141820	1	141.82	4	1	0	3.238	8	4.1	69	0	7	1	1	0	1	0	0	0	0	1	0	0	0	0	0	0	0	0	1	0	1	0	1	0
20104	2	3	313	24130	1350	0	0	0	0	1	274546	1	274.546	12	1	0	2.503	10	4.9	55	0	6	1	3	0	1	0	0	0	0	1	0	0	0	0	0	0	0	1	1	0	1	0	1	0
20105	2	3	313	24130	1350	0	0	0	0	1	-175230	0		8	1	0	0.02	9	4.8	52	0	6	1	3	1	1	0	0	0	0	1	0	0	0	0	0	0	0	0	1	0	0	1	0	1
20422	2	3	313	24181	4698	1	0	0	0	0	incomplete data	0				1	0.01	5	2.8	39	0	1	1	3	1	0	0	0	1	0	1	0	0	0	0	0	0	0	0	1	0	0	1	0	1
20423	2	3	313	24181	405	0	0	0	0	1	12718	1	12.718	0	0	0	1.012	4	2.3	75	0	1	1	3	0	1	0	0	0	0	1	0	0	0	0	0	0	0	1	1	0	1	0	1	0
20424	2	3	313	24181	445.5	0	0	0	0	1	448890	1	448.89	0	0	0	4.097	6	3.1	62	0	6	1	3	0	1	0	0	0	0	1	0	0	0	0	0	0	0	1	1	0	1	0	1	0
20425	2	3	313	24181	445.5	1	0	0	0	0	42625	1	42.625	0	0	0	0.015	3	2	60	0	1	1	3	1	1	0	0	0	0	1	0	0	0	0	0	0	0	0	1	0	1	0	1	0
20426	2	3	313	24181	11664	0	0	0	0	1	10790	1	10.79	0	0	0	0.439	4	2.5	43	0	1	1	3	0	1	0	0	0	0	0	0	0	0	0	0	0	0	0	1	0	1	0	1	0
20427	2	3	313	24181	5832	0	0	0	0	1	198200	1	198.2	0	0	0	1.061	4	2.5	50	0	1	1	3	0	1	0	0	0	0	1	0	0	0	0	0	0	0	0	1	0	1	0	1	0
20428	2	3	313	24181	10935	0	0	0	0	1	518015	1	518.015	0	0	0	4.956	6	3.5	73	0	1	1	3	0	1	0	0	0	0	1	0	0	0	0	0	0	0	1	1	0	1	0	1	0
20429	2	3	313	24181	10935	0	0	0	0	1	391700	1	391.7	0	0	0	3.742	3	1.8	33	0	10	1	3	0	1	0	0	0	0	1	0	0	0	0	0	0	0	1	1	0	1	0	1	0
22505	2	3	314	24510	52	1	0	0	0	0	incomplete data	0				1	0.004	4	2.1	40	0	1	1	3	1	0	0	0	1	0	1	0	0	1	1	1	1	1	0	0	0.016368	0	1	0	1
22506	2	3	314	24510	52	1	0	0	0	0	incomplete data	0				1	0.004	7	3	32	0	1	1	3	1	0	0	0	1	0	1	0	0	1	1	1	1	1	0	0	0.016368	0	1	0	1
22507	2	3	314	24510	1612	0	0	0	0	1	9750	1	9.75	0	0	0	0.008	4	2.1	32	0	7	1	3	0	1	0	0	0	0	1	0	0	0	0	0	0	0	1	1	0.016368	1	0	1	0
22508	2	3	314	24510	572	0	0	0	0	1	111610	1	111.61	10	1	0	1.235	5	2.6	30	0	8	1	3	0	1	0	0	0	0	1	0	0	0	0	0	0	0	0	1	0.016368	1	0	1	0
22509	2	3	314	24510	1352	0	0	0	0	1	400540	1	400.54	4	1	0	4.958	4	2.5	76	0	1	1	3	0	1	0	0	0	0	1	0	0	0	0	0	0	0	0	1	0.016368	1	0	1	0
22510	2	3	314	24510	3536	0	0	0	1	0	12910	1	12.91	0	0	0	0.01	3	2	48	0	1	1	3	1	1	0	0	0	0	1	0	0	0	0	0	0	0	1	1	0.016368	1	0	1	0
22511	2	3	314	24510	1144	0	0	0	0	1	145360	1	145.36	4	1	0	1.444	6	3.1	52	0	10	1	3	0	1	0	0	0	0	1	0	0	0	0	0	0	0	1	1	0.016368	1	0	1	0
22512	2	3	314	24510	3328	0	0	0	0	1	72896	1	72.896	0	0	0	4.452	8	4.1	56	0	6	1	3	0	1	0	0	0	0	1	0	0	0	0	0	0	0	1	1	0.016368	1	0	1	0
22513	2	3	314	24511	1417.5	1	0	0	0	0	incomplete data	0				1	0.006	5	3	40	0	1	1	3	1	0	0	0	1	0	1	0	0	0	0	0	0	0	1	1	0.016368	0	1	0	1
22514	2	3	314	24511	40.5	1	0	0	0	0	-38714	0		0	0	0	0.016	8	3.9	66	0	1	1	3	1	1	0	0	0	0	1	0	0	0	0	0	0	0	1	1	0.016368	0	1	0	1
22515	2	3	314	24511	101.25	0	0	0	0	1	129315	1	129.315	16	1	0	2.074	4	2.5	40	1	1	1	3	0	1	0	0	0	0	1	0	0	0	0	0	0	0	0	1	0.016368	1	0	1	0
22516	2	3	314	24511	101.25	0	0	0	0	1	322700	1	322.7	16	1	0	4.097	6	3.1	35	0	8	1	3	0	1	0	0	0	0	1	0	0	0	0	0	0	0	0	1	0.016368	1	0	1	0
22517	2	3	314	24511	13122	0	0	0	0	1	2900	1	2.9	0	0	0	1.55	5	2.8	55	0	5	1	3	0	0	0	0	0	1	0	0	0	0	0	0	0	0	0	1	0.016368	1	0	1	0
22518	2	3	314	24511	2916	0	0	0	0	1	53720	1	53.72	8	1	0	1.274	5	3	56	1	1	1	3	1	1	0	0	0	0	1	0	0	0	0	0	0	0	1	1	0.016368	1	0	1	0
22519	2	3	314	24511	6014.25	0	0	0	0	1	212085	1	212.085	0	0	0	2.302	10	4.9	72	0	1	1	3	0	1	0	0	0	0	1	0	0	0	0	0	0	0	1	1	0.016368	1	0	1	0
22520	2	3	314	24511	6014.25	0	0	0	0	1	247730	1	247.73	4	1	0	2.883	3	1.8	32	0	10	1	3	0	1	0	0	0	0	1	0	0	0	0	0	0	0	1	0	0.016368	1	0	1	0
22545	2	3	314	24515	1627.5	1	0	0	0	0	incomplete data	0				1	0.011	3	2	67	0	1	1	3	1	0	0	0	1	0	1	0	0	0	0	0	0	0	0	1	0.016368	0	1	0	1
22546	2	3	314	24515	46.5	1	0	0	0	0	incomplete data	0				1	0.038	7	3.8	70	0	1	1	3	1	0	0	0	1	0	1	0	0	0	0	0	0	0	0	1	0.016368	0	1	0	1
22547	2	3	314	24515	302.25	0	0	0	0	1	728550	0		16	1	0	10.218	9	4.6	69	0	7	1	3	0	1	0	0	0	0	1	0	0	0	0	0	0	0	1	1	0.016368	0	1	0	1
22548	2	3	314	24515	302.25	0	0	0	0	1	190040	1	190.04	0	0	0	1.619	8	3.9	65	0	6	1	3	0	1	0	0	0	0	1	0	0	0	0	0	0	0	1	1	0.016368	1	0	1	0
22549	2	3	314	24515	744	1	0	0	0	0	incomplete data	0				0	0.01	3	2	45	0	1	1	3	1	0	0	0	1	0	1	0	0	0	0	0	0	0	1	1	0.016368	0	1	0	1
22550	2	3	314	24515	837	0	0	0	0	1	84700	1	84.7	0	0	0	1.451	6	2.9	40	0	1	1	3	0	1	0	0	0	0	1	0	0	0	0	0	0	0	0	1	0.016368	1	0	1	0
22551	2	3	314	24515	2697	0	0	0	0	1	656550	0		0	0	0	5.261	8	4.1	55	0	1	1	3	0	1	0	0	0	0	1	0	0	0	0	0	0	0	1	1	0.016368	0	1	0	1
22552	2	3	314	24515	2697	0	0	0	0	1	371560	1	371.56	0	0	0	3.946	6	3.3	50	0	1	1	3	0	1	0	0	0	0	1	0	0	0	0	0	0	0	1	1	0.016368	1	0	1	0
22695	2	3	314	24540	2511	1	0	0	0	0	incomplete data	0				0	0.017	6	3.1	35	0	1	1	3	1	0	0	0	1	0	1	0	0	0	0	0	0	0	0	0	0.016368	0	1	0	1
22696	2	3	314	24540	139.5	0	0	0	0	1	94277	1	94.277	0	0	0	1.517	3	2	30	0	7	1	3	0	1	0	0	0	0	1	0	0	0	0	0	0	0	1	0	0.016368	1	0	1	0
22697	2	3	314	24540	69.75	0	0	0	0	1	363860	1	363.86	0	0	0	6.121	7	3.8	55	0	1	1	3	0	1	0	0	0	0	1	0	0	0	0	0	0	1	1	1	0.016368	1	0	1	0
22698	2	3	314	24540	69.75	0	0	0	0	1	29364	1	29.364	0	0	0	0.86	5	3	48	0	1	1	3	0	1	0	0	0	0	1	0	0	0	0	0	0	0	1	1	0.016368	1	0	1	0
22699	2	3	314	24540	2976	0	0	0	0	1	72005	1	72.005	0	0	0	1.014	3	1.8	36	0	6	1	3	0	1	0	0	0	0	1	0	0	0	0	0	0	0	1	1	0.016368	1	0	1	0
22700	2	3	314	24540	3534	0	0	0	0	1	21550	1	21.55	0	0	0	0.852	4	2.1	40	0	6	1	3	0	1	0	0	0	0	1	0	0	0	0	0	0	0	1	1	0.016368	1	0	1	0
22701	2	3	314	24540	2325	0	0	0	0	1	190740	1	190.74	0	0	0	2.681	7	3.8	48	0	6	1	3	0	1	0	0	0	0	1	0	0	0	0	0	0	1	1	1	0.016368	1	0	1	0
22702	2	3	314	24540	2325	0	0	0	0	1	97775	1	97.775	0	0	0	1.742	3	2	75	1	1	1	3	0	1	0	0	0	0	1	0	0	0	0	0	0	1	1	1	0.016368	1	0	1	0
22735	2	3	314	24545	1579.5	0	0	0	0	1	incomplete data	0				0	0.273	3	2	43	0	7	1	3	0	0	0	0	0	0	1	0	0	0	0	0	0	0	0	1	0.016368	0	1	0	1
22736	2	3	314	24545	526.5	0	0	0	0	1	83030	1	83.03	0	0	0	1.075	5	3	54	0	8	1	3	0	1	0	0	0	0	1	0	0	0	0	0	0	0	1	1	0.016368	1	0	1	0
22737	2	3	314	24545	668.25	0	0	0	0	1	-157760	0		5	1	0	0.809	4	2.5	46	0	6	1	3	0	1	0	0	0	0	1	0	0	0	0	0	0	0	1	1	0.016368	0	1	0	1
22738	2	3	314	24545	668.25	0	0	0	0	1	1000000	0		8	1	0	9.005	3	2	49	0	12	1	3	0	1	0	0	0	0	1	0	0	0	0	0	0	1	1	1	0.016368	0	1	0	1
22739	2	3	314	24545	6075	0	0	0	1	0	-4750	1	-4.75	0	0	0	0.01	2	1.5	48	0	6	1	3	0	0	0	0	1	0	1	0	0	0	0	0	0	0	1	1	0.016368	1	0	1	0
22740	2	3	314	24545	4617	0	0	0	0	1	50185	1	50.185	0	0	0	0.726	3	2	66	0	1	1	3	0	1	0	0	0	0	1	0	0	0	0	0	0	0	1	1	0.016368	1	0	1	0
22741	2	3	314	24545	4374	0	0	0	0	1	609570	0		4	1	0	7.285	6	3.3	46	0	8	1	3	0	1	0	0	0	0	1	0	0	0	0	0	1	1	1	1	0.016368	0	1	0	1
22742	2	3	314	24545	4374	0	0	0	0	1	286920	1	286.92	8	1	0	3.241	9	4.4	57	0	8	1	3	0	0	0	0	1	0	1	0	0	0	0	0	0	1	1	1	0.016368	1	0	1	0
22767	2	3	314	24549	1820	1	0	0	0	0	incomplete data	0				0	0.025	5	3	55	0	1	1	3	1	0	0	0	1	0	1	0	0	0	0	0	0	0	0	1	0.016368	0	1	0	1
22768	2	3	314	24549	52	0	0	0	0	1	66040	1	66.04	0	0	0	0.115	3	1.8	55	0	5	1	3	0	1	0	0	0	0	1	0	0	0	0	0	0	0	1	1	0.016368	1	0	1	0
22769	2	3	314	24549	520	0	0	0	0	1	11710	1	11.71	0	0	0	3.227	6	3.1	54	0	8	1	3	0	1	0	0	0	0	1	0	0	0	0	0	0	0	1	1	0.016368	1	0	1	0
22770	2	3	314	24549	520	0	0	0	0	1	618070	0		0	0	0	8.101	9	4.6	37	0	6	1	3	0	1	0	0	0	0	1	0	0	0	0	0	1	0	0	1	0.016368	0	1	0	1
22771	2	3	314	24549	6240	0	0	0	1	0	23020	1	23.02	0	0	0	0.429	6	3.1	38	0	5	1	3	0	0	0	1	0	0	1	0	0	0	0	0	0	0	1	1	0.016368	1	0	1	0
22772	2	3	314	24549	1560	0	0	0	0	1	141150	1	141.15	8	1	0	2.023	6	3.5	46	0	8	1	3	0	1	0	0	0	0	1	0	0	0	0	0	1	0	1	1	0.016368	1	0	1	0
22773	2	3	314	24549	2418	0	0	0	0	1	198859	1	198.859	0	0	0	1.021	4	2.3	38	0	6	1	3	0	1	0	0	0	0	1	0	0	0	0	0	0	0	1	1	0.016368	1	0	1	0
22774	2	3	314	24549	2418	0	0	0	0	1	532018	1	532.018	8	1	0	5.402	6	3.5	49	0	8	1	3	0	0	0	1	0	0	1	0	0	0	0	0	0	0	1	1	0.016368	1	0	1	0
22529	2	3	315	24513	2640	0	0	0	1	0	47800	1	47.8	0	0	0	0.75	3	2	60	0	5	1	3	0	0	0	1	0	0	1	0	0	0	0	0	0	0	1	1	0.0235207	1	0	1	0
22530	2	3	315	24513	2640	0	0	0	1	0	incomplete data	0				0	0.18	6	3.3	66	0	1	1	3	1	0	0	0	1	0	1	0	0	0	0	0	0	0	1	1	0.0235207	0	1	0	1
22531	2	3	315	24513	264	0	0	0	0	1	123672	1	123.672	10	1	0	1.264	6	3.1	67	0	10	1	3	0	1	0	0	0	0	1	0	0	0	0	0	0	0	1	1	0.0235207	1	0	1	0
22532	2	3	315	24513	264	0	0	0	0	1	132110	1	132.11	0	0	0	0.839	7	4	72	0	1	1	3	0	1	0	0	0	0	1	0	0	0	0	0	0	0	1	1	0.0235207	1	0	1	0
22533	2	3	315	24513	891	0	0	0	0	1	379360	1	379.36	0	0	0	3.364	6	3.3	76	0	1	1	3	0	1	0	0	0	0	1	0	0	0	0	0	0	0	1	1	0.0235207	1	0	1	0
22534	2	3	315	24513	891	0	0	0	0	1	199690	1	199.69	4	1	0	1.896	3	2	48	0	1	1	3	0	1	0	0	0	0	1	0	0	0	0	0	0	0	1	1	0.0235207	1	0	1	0
22535	2	3	315	24513	891	0	0	0	0	1	175985	1	175.985	0	0	0	2.048	4	2.3	27	0	1	1	3	0	1	0	0	0	0	1	0	0	0	0	0	0	0	0	1	0.0235207	1	0	1	0
22536	2	3	315	24513	891	0	0	0	0	1	124825	1	124.825	0	0	0	2.048	4	2.5	75	0	8	1	3	0	1	0	0	0	0	1	0	0	0	0	0	0	0	1	1	0.0235207	1	0	1	0
22569	2	3	315	24519	2257.5	0	0	0	1	0	20770	1	20.77	0	0	0	0.474	6	3.3	52	0	1	1	3	0	1	0	0	0	0	1	0	0	0	0	0	0	0	1	1	0.0235207	1	0	1	0
22570	2	3	315	24519	1417.5	0	0	0	0	1	113760	1	113.76	0	0	0	0.829	4	2.3	40	0	1	1	3	0	1	0	0	0	0	1	0	0	0	0	0	0	0	1	1	0.0235207	1	0	1	0
22571	2	3	315	24519	525	0	0	0	0	1	111800	1	111.8	15	1	0	2.265	6	3.3	68	0	7	1	3	0	1	0	0	0	0	1	0	0	0	0	0	0	0	1	1	0.0235207	1	0	1	0
22572	2	3	315	24519	525	0	0	0	0	1	201420	1	201.42	0	0	0	2.013	5	2.6	34	0	7	1	3	0	1	0	0	0	0	1	0	0	0	0	0	0	0	1	1	0.0235207	1	0	1	0
22573	2	3	315	24519	4410	1	0	0	0	0	incomplete data	0				1	0.014	6	3.5	55	0	7	1	3	1	0	0	0	1	0	1	0	0	0	0	0	0	0	1	1	0.0235207	0	1	0	1
22574	2	3	315	24519	1260	0	0	0	0	1	99726	1	99.726	0	0	0	1.234	3	2	39	0	1	1	3	0	1	0	0	0	0	1	0	0	0	0	0	0	0	1	1	0.0235207	1	0	1	0
22575	2	3	315	24519	630	0	0	0	0	1	337730	1	337.73	8	1	0	3.48	6	3.3	55	0	1	1	3	0	1	0	0	0	0	1	0	0	0	0	0	0	0	0	1	0.0235207	1	0	1	0
22576	2	3	315	24519	630	0	0	0	0	1	507470	1	507.47	0	0	0	4.047	10	5.1	80	0	1	1	3	0	1	0	0	0	0	1	0	0	0	0	0	0	0	1	1	0.0235207	1	0	1	0
22719	2	3	315	24543	2467.5	0	0	0	0	1	3380	1	3.38	0	0	0	0.518	4	2.1	40	0	8	1	3	0	0	0	0	1	0	0	0	0	0	0	0	0	0	0	1	0.0235207	1	0	1	0
22720	2	3	315	24543	525	0	0	0	0	1	123400	1	123.4	0	0	0	1.239	6	3.1	28	0	1	1	3	0	1	0	0	0	0	1	0	0	0	0	0	0	0	1	1	0.0235207	1	0	1	0
22721	2	3	315	24543	997.5	0	0	0	0	1	125140	1	125.14	0	0	0	2.066	6	3.5	49	0	1	1	3	0	1	0	0	0	0	1	0	0	0	0	0	0	0	1	1	0.0235207	1	0	1	0
22722	2	3	315	24543	997.5	0	0	0	0	1	260430	1	260.43	0	0	0	2.052	4	2.5	42	0	6	1	3	0	1	0	0	0	0	1	0	0	0	0	0	0	0	1	1	0.0235207	1	0	1	0
22723	2	3	315	24543	14700	1	0	0	0	0	incomplete data	0				0	0.013	4	2.5	45	0	1	1	3	1	0	0	0	1	0	1	0	0	0	0	0	0	0	1	1	0.0235207	0	1	0	1
22724	2	3	315	24543	1102.5	0	0	0	0	1	182000	1	182	0	0	0	1.85	4	2.5	46	0	1	1	3	0	1	0	0	0	0	1	0	0	0	0	0	0	0	1	1	0.0235207	1	0	1	0
22725	2	3	315	24543	2205	0	0	0	0	1	195680	1	195.68	0	0	0	4.997	10	5.3	55	0	6	1	3	0	1	0	0	0	0	1	0	0	0	0	0	0	0	1	1	0.0235207	1	0	1	0
22726	2	3	315	24543	2205	1	0	0	0	0	98450	1	98.45	0	0	0	2.075	13	6	75	0	1	1	3	0	1	0	0	0	0	1	0	0	0	0	0	0	0	1	1	0.0235207	1	0	1	0
22743	2	3	315	24546	2244	1	0	0	0	0	incomplete data	0				1	0.016	3	1.8	25	0	6	1	3		0	0	0	1	0	1	0	0	0	0	0	0	1	1	1	0.0235207	0	1	0	1
22744	2	3	315	24546	2244	1	0	0	0	0	incomplete data	0				0	0.025	8	3.7	50	0	6	1	3	0	0	0	0	1	0	1	0	0	0	0	0	0	1	1	1	0.0235207	0	1	0	1
22745	2	3	315	24546	462	0	0	0	0	1	111345	1	111.345	0	0	0	2.041	5	2.8	28	0	6	1	3	0	1	0	0	0	0	1	0	0	0	0	0	0	0	1	1	0.0235207	1	0	1	0
22746	2	3	315	24546	462	0	0	0	0	1	93810	1	93.81	0	0	0	2.706	6	3.3	60	0	1	1	3	0	1	0	0	0	0	1	0	0	0	0	0	0	0	1	1	0.0235207	1	0	1	0
22747	2	3	315	24546	957	0	0	0	0	1	120160	1	120.16	0	0	0	1.654	4	2.5	40	0	1	1	3	0	1	0	0	0	0	1	0	0	0	0	0	0	0	1	1	0.0235207	1	0	1	0
22748	2	3	315	24546	957	0	0	0	0	1	520360	1	520.36	0	0	0	7.132	4	2.3	57	0	1	1	3	0	0	1	0	0	0	1	0	0	0	0	0	0	0	1	1	0.0235207	1	0	1	0
22749	2	3	315	24546	957	0	0	0	0	1	819242	0		16	1	0	6.27	10	4.9	62	0	1	1	3	0	1	0	0	0	0	1	0	0	0	0	0	0	0	1	1	0.0235207	0	1	0	1
22750	2	3	315	24546	957	0	0	0	0	1	478460	1	478.46	8	1	0	6.69	5	2.8	40	0	1	1	3	0	1	0	0	0	0	1	0	0	0	0	0	0	0	1	1	0.0235207	1	0	1	0
22553	2	3	316	24516	89.5	1	0	0	0	0	incomplete data	0				1	0.004	6	3.1	40	0	8	1	3	0	0	0	0	1	0	1	0	0	0	0	0	0	0	1	1	0.0001663	0	1	0	1
22554	2	3	316	24516	89.5	1	0	0	0	0	incomplete data	0				1	0.003	2	1.5	60	0	1	1	3	0	0	0	0	1	0	1	0	0	0	0	0	0	0	1	1	0.0001663	0	1	0	1
22555	2	3	316	24516	4296	0	0	0	0	1	incomplete data	0				1	0.025	3	2	42	0	7	1	3	0	0	0	0	1	0	1	0	0	0	0	0	0	0	1	1	0.0001663	0	1	0	1
22556	2	3	316	24516	1432	0	0	0	0	1	128525	1	128.525	0	0	0	1.539	7	3.8	55	0	1	1	3	0	1	0	0	0	0	1	0	0	0	0	0	0	0	0	1	0.0001663	1	0	1	0
22557	2	3	316	24516	1163.5	0	0	0	0	1	572343	0		0	0	0	4.898	5	3	42	0	8	1	3	0	1	0	0	0	0	1	0	0	0	0	0	0	0	0	1	0.0001663	0	1	0	1
22558	2	3	316	24516	12172	0	0	0	0	1	113645	1	113.645	0	0	0	0.809	4	2.5	43	0	8	1	3	0	1	0	0	0	0	1	0	0	0	0	0	0	0	0	1	0.0001663	1	0	1	0
22559	2	3	316	24516	3938	0	0	0	0	1	114170	1	114.17	0	0	0	1.022	5	3	45	0	7	1	3	0	1	0	0	0	0	1	0	0	0	0	0	0	0	0	1	0.0001663	1	0	1	0
22560	2	3	316	24516	2506	0	0	0	1	0	354515	1	354.515	0	0	0	3.439	6	3.1	35	0	7	1	3	0	1	0	0	0	0	1	0	0	0	0	0	0	0	1	1	0.0001663	1	0	1	0
22561	2	3	316	24518	4062.5	1	0	0	0	0	incomplete data	0				1	0.006	6	3.3	42	0	1	1	3	1	0	0	0	1	0	1	0	0	0	0	0	0	0	1	1	0.0001663	0	1	0	1
22562	2	3	316	24518	187.5	0	0	0	1	0	202810	1	202.81	0	0	0	1.871	3	2	63	0	6	1	3	0	1	0	0	0	0	1	0	0	0	0	0	0	0	0	1	0.0001663	1	0	1	0
22563	2	3	316	24518	93.75	0	0	0	0	1	953930	0		0	0	0	8.093	6	3.3	45	0	1	1	3	0	1	0	0	0	0	1	0	0	0	0	0	0	0	0	1	0.0001663	0	1	0	1
22564	2	3	316	24518	93.75	0	0	0	0	1	410385	1	410.385	0	0	0	4.097	5	3	46	0	1	1	3	0	1	0	0	0	0	1	0	0	0	0	0	0	0	0	1	0.0001663	1	0	1	0
22565	2	3	316	24518	5437.5	0	0	0	1	0	incomplete data	0				1	0.021	6	3.3	47	0	1	1	3	0	0	0	0	1	0	1	0	0	0	0	0	0	0	0	1	0.0001663	0	1	0	1
22566	2	3	316	24518	2812.5	0	0	0	0	1	226280	1	226.28	0	0	0	1.829	4	2.5	70	0	1	1	3	0	1	0	0	0	0	1	0	0	0	0	0	0	0	0	1	0.0001663	1	0	1	0
22567	2	3	316	24518	2062.5	0	0	0	0	1	560000	1	560	0	0	0	5.302	8	4.1	55	0	1	1	3	0	1	0	0	0	0	1	0	0	0	0	0	0	0	1	1	0.0001663	1	0	1	0
22568	2	3	316	24518	2062.5	0	0	0	0	1	248048	1	248.048	0	0	0	2.241	3	2	52	0	1	1	3	0	1	0	0	0	0	1	0	0	0	0	0	0	0	0	0	0.0001663	1	0	1	0
22609	2	3	316	24524	156.25	1	0	0	0	0	incomplete data	0				1	0.004	5	2.8	61	0	1	1	3		0	0	0	1	0	1	0	0	0	0	0	0	0	0	1	0.0001663	0	1	0	1
22610	2	3	316	24524	156.25	1	0	0	0	0	incomplete data	0				1	0.004	6	3.3	63	0	1	1	3	1	0	0	0	1	0	1	0	0	0	0	0	0	0	0	1	0.0001663	0	1	0	1
22611	2	3	316	24524	3812.5	1	0	0	0	0	incomplete data	0				1	0.012	5	3	45	0	1	1	3	1	0	0	0	1	0	1	0	0	0	0	0	0	0	0	1	0.0001663	0	1	0	1
22612	2	3	316	24524	312.5	0	0	0	0	1	145070	1	145.07	0	0	0	0.631	3	1.8	32	0	1	1	3	0	1	0	0	0	0	1	0	0	0	0	0	0	0	0	1	0.0001663	1	0	1	0
22613	2	3	316	24524	62.5	0	0	0	0	1	184435	1	184.435	0	0	0	2.444	4	2.5	46	0	5	1	3	0	1	0	0	0	0	1	0	0	0	0	0	0	0	0	1	0.0001663	1	0	1	0
22614	2	3	316	24524	9750	1	0	0	0	0	incomplete data	0				1	0.021	9	4.6	60	0	1	1	3	1	0	0	0	1	0	1	0	0	0	0	0	0	0	0	1	0.0001663	0	1	0	1
22615	2	3	316	24524	250	0	0	0	0	1	191212	1	191.212	0	0	0	1.644	4	2.5	65	0	7	1	3	0	0	0	0	1	0	1	0	0	0	0	0	0	0	0	1	0.0001663	1	0	1	0
22616	2	3	316	24524	1750	0	0	0	0	1	357005	1	357.005	0	0	0	2.881	2	1.5	46	0	6	1	3	0	1	0	0	0	0	1	0	0	0	0	0	0	0	1	1	0.0001663	1	0	1	0
22751	2	3	316	24547	537	1	0	0	0	0	incomplete data	0				0	0.004	2	1.5	43	0	5	1	2	1	0	0	0	1	0	1	0	0	0	0	0	0	0	1	1	0.0001663	0	1	0	1
22752	2	3	316	24547	3490.5	1	0	0	0	0	incomplete data	0				0	0.008	5	2.8	45	0	7	1	3	0	0	0	0	1	0	1	0	0	0	0	0	0	0	1	1	0.0001663	0	1	0	1
22753	2	3	316	24547	268.5	0	0	0	0	1	80120	1	80.12	0	0	0	1.037	3	1.8	56	0	1	1	3	0	1	0	0	0	0	1	0	0	0	0	0	0	0	0	1	0.0001663	1	0	1	0
22754	2	3	316	24547	716	0	0	0	0	1	277110	1	277.11	0	0	0	1.247	3	1.8	31	0	10	1	3	0	1	0	0	0	0	1	0	0	0	0	0	0	0	0	1	0.0001663	1	0	1	0
22755	2	3	316	24547	179	1	0	0	0	0	incomplete data	0				0	0.004	5	2.6	45	0	1	1	3	0	0	0	0	1	0	1	0	0	0	0	0	0	0	0	1	0.0001663	0	1	0	1
22756	2	3	316	24547	6265	1	0	0	0	0	incomplete data	0				0	0.016	2	1.5	50	1	1	1	2	0	0	1	0	0	0	1	0	0	0	0	0	0	0	0	1	0.0001663	0	1	0	1
22757	2	3	316	24547	1611	0	0	0	0	1	238417	1	238.417	0	0	0	1.77	5	3	53	0	8	1	3	0	1	0	0	0	0	1	0	0	0	0	0	0	0	0	1	0.0001663	1	0	1	0
22758	2	3	316	24547	1432	0	0	0	0	1	336400	1	336.4	0	0	0	4.919	11	5.6	52	0	8	1	3	0	1	0	0	0	0	1	0	0	0	0	0	0	0	0	1	0.0001663	1	0	1	0
22759	2	3	316	24548	129	1	0	0	0	0	incomplete data	0				0	0.004	4	2.5	48	0	10	1	3	0	0	0	0	1	0	1	0	0	0	0	0	0	0	0	1	0.0001663	0	1	0	1
22760	2	3	316	24548	3418.5	1	0	0	0	0	incomplete data	0				0	0.008	5	3	62	0	1	1	3	1	0	0	0	1	0	1	0	0	0	0	0	0	0	0	1	0.0001663	0	1	0	1
22761	2	3	316	24548	3418.5	0	0	0	0	1	27000	1	27	0	0	0	0.611	2	1.5	65	0	1	1	3	0	1	0	0	0	0	1	0	0	0	0	0	0	0	0	1	0.0001663	1	0	1	0
22762	2	3	316	24548	1032	0	0	0	0	1	74050	1	74.05	0	0	0	1.628	6	3.3	65	0	8	1	3	0	1	0	0	0	0	1	0	0	0	0	0	0	0	0	1	0.0001663	1	0	1	0
22763	2	3	316	24548	1032	0	0	0	0	1	1400000	0		0	0	0	8.914	8	4.3	47	0	10	1	3	0	1	0	0	0	0	1	0	0	0	0	0	0	0	0	1	0.0001663	0	1	0	1
22764	2	3	316	24548	774	0	0	0	0	1	210925	1	210.925	0	0	0	3.438	4	2.5	42	0	7	1	3	0	1	0	0	0	0	1	0	0	0	0	0	0	0	0	1	0.0001663	1	0	1	0
22765	2	3	316	24548	774	0	0	0	0	1	754960	0		0	0	0	7.359	6	3.5	65	0	5	1	3	0	1	0	0	0	0	1	0	0	0	0	0	0	0	0	1	0.0001663	0	1	0	1
22766	2	3	316	24548	774	0	0	0	0	1	391000	1	391	0	0	0	0.847	10	4.9	60	0	6	1	3	0	1	0	0	0	0	1	0	0	0	0	0	0	0	0	1	0.0001663	1	0	1	0
22585	2	3	317	24521	190	0	0	0	0	1	-4590	1	-4.59	0	0	0	0.004	3	2	35	0	5	1	3	0	0	1	0	0	0	1	0	0	0	0	0	0	0	0	1	0.000625	1	0	1	0
22586	2	3	317	24521	1900	0	0	0	0	1	11750	1	11.75	0	0	0	0.396	6	3.5	52	0	12	1	3	0	0	0	0	1	0	1	0	0	0	0	0	0	0	0	1	0.000625	1	0	1	0
22587	2	3	317	24521	1900	0	0	0	0	1	8450	1	8.45	0	0	0	0.172	2	1.5	47	1	6	1	3	0	0	1	0	0	0	0	0	0	0	0	0	0	0	0	1	0.000625	1	0	1	0
22588	2	3	317	24521	1425	0	0	0	0	1	2250	1	2.25	0	0	0	1.022	5	2.6	35	0	8	1	3	0	0	0	0	1	0	0	0	0	0	0	0	0	0	0	1	0.000625	1	0	1	0
22589	2	3	317	24521	1425	0	0	0	0	1	18370	1	18.37	0	0	0	1.64	4	2.3	60	0	1	1	3	0	1	0	0	0	0	1	0	0	0	0	0	0	0	0	1	0.000625	1	0	1	0
22590	2	3	317	24521	633.34	0	0	0	0	1	178750	1	178.75	0	0	0	4.047	7	3.6	38	0	6	1	3	0	1	0	0	0	0	1	0	0	0	0	0	0	0	0	1	0.000625	1	0	1	0
22591	2	3	317	24521	633.34	0	0	0	0	1	355820	1	355.82	20	1	0	4.047	9	4.4	70	0	1	1	3	0	1	0	0	0	0	1	0	0	0	0	0	0	0	0	1	0.000625	1	0	1	0
22592	2	3	317	24521	633.34	0	0	0	0	1	278200	1	278.2	20	1	0	3.574	5	3	47	0	12	1	3	0	1	0	0	0	0	1	0	0	0	0	0	0	0	0	1	0.000625	1	0	1	0
22593	2	3	317	24522	1091.25	0	0	0	0	1	incomplete data	0				1	0.025	1	1	55	0	1	1	3	0	0	0	0	0	0	1	0	0	0	0	0	0	0	0	1	0.000625	0	1	0	1
22594	2	3	317	24522	1091.25	0	0	0	0	1	incomplete data	0				1	0.025	5	2.6	45	0	1	1	3	0	0	0	0	1	0	1	0	0	0	0	0	0	0	0	1	0.000625	0	1	0	1
22595	2	3	317	24522	218.25	0	0	0	0	1	101505	1	101.505	0	0	0	1.197	5	2.8	65	0	1	1	3	0	1	0	0	0	0	1	0	0	0	0	0	0	0	0	1	0.000625	1	0	1	0
22596	2	3	317	24522	218.25	0	0	0	0	1	28460	1	28.46	0	0	0	0.82	3	2	45	0	1	1	3	0	1	0	0	0	0	1	0	0	0	0	0	0	0	0	1	0.000625	1	0	1	0
22597	2	3	317	24522	509.25	0	0	0	0	1	667850	0		16	1	0	10.117	10	5.3	42	0	12	1	3	0	1	0	0	0	0	1	0	0	0	0	0	0	0	0	1	0.000625	0	1	0	1
22598	2	3	317	24522	509.25	0	0	0	0	1	356120	1	356.12	16	1	0	3.692	6	3.1	60	0	5	1	3	0	1	0	0	0	0	1	0	0	0	0	0	0	0	0	1	0.000625	1	0	1	0
22599	2	3	317	24522	509.25	0	0	0	0	1	666450	0		0	0	0	10.622	8	4.3	55	0	1	1	3	0	1	0	0	0	0	1	0	0	0	0	0	0	0	0	1	0.000625	0	1	0	1
22600	2	3	317	24522	509.25	0	0	0	0	1	325230	1	325.23	0	0	0	2.503	5	2.8	40	0	7	1	2	0	1	0	0	0	0	1	0	0	0	0	0	0	0	0	1	0.000625	1	0	1	0
22617	2	3	317	24525	464	1	0	0	0	0	incomplete data	0				1	0.003	5	2.8	45	0	6	1	3	1	0	0	0	0	0	1	0	0	0	0	0	0	0	1	1	0.000625	0	1	0	1
22618	2	3	317	24525	5104	1	0	0	0	0	incomplete data	0				1	0.008	4	2.3	38	0	6	1	3	1	0	0	0	0	0	1	0	0	0	0	0	0	0	1	1	0.000625	0	1	0	1
22619	2	3	317	24525	1392	0	0	0	0	1	169150	1	169.15	0	0	0	2.388	8	4.1	59	1	6	1	3	0	1	0	0	0	0	1	0	0	0	0	0	0	0	0	1	0.000625	1	0	1	0
22620	2	3	317	24525	2320	0	0	0	1	0	394075	1	394.075	4	1	0	1.539	9	4.6	52	0	7	1	3	0	1	0	0	0	0	1	0	0	0	0	0	0	0	0	1	0.000625	1	0	1	0
22621	2	3	317	24525	348	0	0	0	0	1	incomplete data	0				1	0.004	6	3.3	40	1	1	1	3	1	0	0	0	1	0	1	0	0	0	0	0	0	0	0	1	0.000625	0	1	0	1
22622	2	3	317	24525	16356	0	0	0	0	1	237225	1	237.225	4	1	0	1.095	4	2.3	40	0	10	1	3	0	1	0	0	0	0	1	0	0	0	0	1	0	0	0	0	0.000625	1	0	1	0
22623	2	3	317	24525	5220	0	0	0	0	1	177000	1	177	0	0	0	2.63	5	3	45	0	1	1	3	0	1	0	0	0	0	1	0	0	0	0	0	0	0	0	1	0.000625	1	0	1	0
22624	2	3	317	24525	4872	0	0	0	0	1	708158	0		4	1	0	6.12	7	3.8	60	0	8	1	3	0	1	0	0	0	0	1	0	0	0	0	0	0	0	0	1	0.000625	0	1	0	1
22775	2	3	317	24551	2204	1	0	0	0	0	incomplete data	0				1	0.012	7	3.8	55	0	1	1	3	1	0	0	0	1	0	1	0	0	0	0	0	0	0	1	1	0.000625	0	1	0	1
22776	2	3	317	24551	116	0	0	0	0	1	17940	1	17.94	0	0	0	0.138	7	3.8	66	0	1	1	3	0	1	0	0	0	0	0	0	0	0	0	0	0	0	0	1	0.000625	1	0	1	0
22777	2	3	317	24551	116	0	0	0	0	1	1100000	0		0	0	0	4.047	6	3.5	85	0	1	1	3	0	1	0	0	0	0	1	0	0	0	0	0	0	0	0	1	0.000625	0	1	0	1
22778	2	3	317	24551	14210	0	0	0	0	1	8650	1	8.65	0	0	0	0.016	5	3	45	0	1	1	3	0	0	0	1	0	0	0	0	0	0	0	0	0	0	0	1	0.000625	1	0	1	0
22779	2	3	317	24551	14210	1	0	0	0	0	incomplete data	0				0	0.02	8	4.1	52	0	1	1	3	1	0	0	1	0	0	0	0	0	0	0	0	0	0	0	1	0.000625	0	1	0	1
22780	2	3	317	24551	812	1	0	0	0	0	20150	1	20.15	0	0	0	0.212	8	4.3	68	0	6	1	3	0	0	0	0	1	0	0	0	0	0	0	0	0	0	0	1	0.000625	1	0	1	0
22781	2	3	317	24551	812	0	0	0	0	1	513100	1	513.1	4	1	0	5.057	12	5.7	58	1	1	1	3	1	1	0	0	0	0	1	0	0	0	0	0	0	0	0	1	0.000625	1	0	1	0
22782	2	3	317	24551	812	0	0	0	1	0	96550	1	96.55	0	0	0	1.214	6	3.5	50	0	8	1	3	0	1	0	0	0	0	1	0	0	0	0	0	0	0	0	1	0.000625	1	0	1	0
22783	2	3	317	24552	570	0	0	0	1	0	incomplete data	0				1	0.005	4	2.1	26	0	7	1	3	1	0	0	0	1	0	1	0	0	0	0	0	0	0	0	1	0.000625	0	1	0	1
22784	2	3	317	24552	570	0	0	0	1	0	incomplete data	0				1	0.005	3	2	60	0	1	1	3	1	0	1	0	0	0	1	0	0	0	0	0	0	0	0	1	0.000625	0	1	0	1
22785	2	3	317	24552	3515	0	0	0	1	0	incomplete data	0				1	0.015	7	3.4	60	0	1	1	2	1	0	0	0	1	0	1	0	0	0	0	0	0	0	0	1	0.000625	0	1	0	1
22786	2	3	317	24552	3515	1	0	0	0	0	incomplete data	0				1	0.008	4	2.3	34	0	1	1	3	0	0	0	0	1	0	1	0	0	0	0	0	0	0	0	1	0.000625	0	1	0	1
22787	2	3	317	24552	380	1	0	0	0	0	incomplete data	0				1	0.033	6	3.5	45	0	1	1	2	1	0	0	0	1	0	1	0	0	0	0	0	0	0	0	1	0.000625	0	1	0	1
22788	2	3	317	24552	380	0	0	0	0	1	914700	0		0	0	0	3.095	5	2.6	32	0	5	1	3	0	1	0	0	0	0	1	0	0	0	0	0	0	0	0	1	0.000625	0	1	0	1
22789	2	3	317	24552	1235	0	0	0	0	1	331050	1	331.05	0	0	0	4.245	5	2.6	27	0	7	1	3	0	1	0	0	0	0	1	0	0	0	0	0	0	0	0	1	0.000625	1	0	1	0
22790	2	3	317	24552	1235	0	0	0	0	1	1000000	0		0	0	0	2.832	6	3.3	35	0	1	1	3	0	1	0	0	0	0	1	0	0	0	0	0	0	0	0	1	0.000625	0	1	0	1
22791	2	3	317	24554	4001.25	0	0	0	0	1	incomplete data	0				0	0.02	6	3.5	50	0	1	1	3		0	0	0	1	0	1	0	0	0	0	0	0	0	0	1	0.000625	0	1	0	1
22792	2	3	317	24554	4001.25	0	0	0	0	1	48650	1	48.65	0	0	0	0.454	4	2.5	35	0	1	1	3	0	1	0	0	0	0	1	0	0	0	0	0	0	0	0	1	0.000625	1	0	1	0
22793	2	3	317	24554	509.25	0	0	0	0	1	86500	1	86.5	0	0	0	1.72	5	3	45	0	1	1	3	0	1	0	0	0	0	1	0	0	0	0	0	0	0	0	0	0.000625	1	0	1	0
22794	2	3	317	24554	509.25	0	0	0	0	1	152780	1	152.78	0	0	0	1.416	4	2.3	45	0	1	1	3	0	0	1	0	0	0	1	0	0	0	0	0	0	0	0	1	0.000625	1	0	1	0
22795	2	3	317	24554	509.25	0	0	0	0	1	365100	1	365.1	0	0	0	2.828	5	2.8	80	0	1	1	3	0	1	0	0	0	0	1	0	0	0	0	0	0	0	0	1	0.000625	1	0	1	0
22796	2	3	317	24554	509.25	0	0	0	0	1	incomplete data	0				0	0.05	4	2.1	30	0	8	1	3		0	1	0	0	0	1	0	0	0	0	0	0	0	0	1	0.000625	0	1	0	1
22797	2	3	317	24554	509.25	0	0	0	0	1	425700	1	425.7	0	0	0	4.432	6	3.1	54	0	12	1	3	0	1	0	0	0	0	1	0	0	0	0	0	0	0	0	1	0.000625	1	0	1	0
22798	2	3	317	24554	509.25	0	0	0	0	1	460100	1	460.1	0	0	0	4.457	8	4.1	50	0	1	1	3	0	1	0	0	0	0	1	0	0	0	0	0	0	0	0	1	0.000625	1	0	1	0
22577	2	3	318	24520	3667	0	0	0	0	1	incomplete data	0				1	0.414	9	4.4	50	0	6	1	3	0	0	0	0	1	0	1	0	0	0	0	0	0	0	1	1	0.0022496	0	1	0	1
22578	2	3	318	24520	3667	0	0	0	0	1	22750	1	22.75	0	0	0	3.267	6	3.5	80	0	1	1	3	0	0	0	1	0	0	1	0	0	0	0	0	0	0	0	1	0.0022496	1	0	1	0
22579	2	3	318	24520	868.5	0	0	0	0	1	incomplete data	0				0	2.083	2	1.5	50	1	7	1	3	0	0	0	0	0	0	1	0	0	0	0	0	0	0	0	1	0.0022496	0	1	0	1
22580	2	3	318	24520	868.5	0	0	0	0	1	277325	1	277.325	0	0	0	2.033	12	5.9	52	0	7	1	3	0	1	0	0	0	0	1	0	0	0	0	0	0	0	0	1	0.0022496	1	0	1	0
22581	2	3	318	24520	193	0	0	0	0	1	48050	1	48.05	0	0	1	0.057	9	4.6	65	0	1	1	3	0	1	0	0	0	0	1	0	0	0	0	0	0	0	0	1	0.0022496	1	0	1	0
22582	2	3	318	24520	193	0	0	0	0	1	465240	1	465.24	8	1	0	4.856	9	4.8	75	0	12	1	3	0	1	0	0	0	0	1	0	0	0	0	0	0	0	0	1	0.0022496	1	0	1	0
[truncated: 33,201 more rows]
